# Supplementary material for: Transcriptome and De Novo Analysis of Rosa xanthina f. spontanea&nbsp;in Response to Cold Stress
Source: Research Square preprint supplement (doi:10.21203/rs.3.rs-199455/v1), 2021-02-16
Supplement: Supplementary file 1 [file 18a9106509f136e7c29b48cd.xlsx]

## Sheet: Sheet1
Query	KEGG_hit	KEGG_identity	KEGG_evalue	GeneName	GeneDescription	KOEntry	KODescription	EC	PathwayEntry	PathwayDefinition	KEGGLevel1	KEGGLevel2
TRINITY_DN26953_c0_g5	fve:101309581	92.7	1.5e-106	-	60S ribosomal protein L13a-4	K02872	large subunit ribosomal protein L13Ae	-	fve03010	Ribosome	Genetic Information Processing	Translation
TRINITY_DN26953_c0_g8	pmum:103339734	35.1	4.8e-36	-	serine/threonine-protein kinase CTR1	K14510	serine/threonine-protein kinase CTR1	EC:2.7.11.1	pmum04075	Plant hormone signal transduction	Environmental Information Processing	Signal transduction
TRINITY_DN26955_c0_g1	sita:101771278	57.1	3.8e-64	-	ras-related protein RABE1d-like	K07901	Ras-related protein Rab-8A	-	sita04144	Endocytosis	Cellular Processes	Transport and catabolism
TRINITY_DN26955_c0_g2	mpp:MICPUCDRAFT_49521	60.3	1.5e-66	-	hypothetical protein	K07901	Ras-related protein Rab-8A	-	mpp04144	Endocytosis	Cellular Processes	Transport and catabolism
TRINITY_DN26958_c0_g1	zma:100192545	73.6	3.5e-55	-	uncharacterized LOC100192545	K14758	casein kinase I homolog HRR25	EC:2.7.11.1	zma03008	Ribosome biogenesis in eukaryotes	Genetic Information Processing	Translation
TRINITY_DN26958_c0_g4	vvi:100232857	60.8	3.5e-21	ADH7	alcohol dehydrogenase 7	K18857	alcohol dehydrogenase class-P	EC:1.1.1.1	vvi00010	Glycolysis / Gluconeogenesis	Metabolism	Carbohydrate metabolism
TRINITY_DN26958_c0_g4	vvi:100232857	60.8	3.5e-21	ADH7	alcohol dehydrogenase 7	K18857	alcohol dehydrogenase class-P	EC:1.1.1.1	vvi00071	Fatty acid degradation	Metabolism	Lipid metabolism
TRINITY_DN26958_c0_g4	vvi:100232857	60.8	3.5e-21	ADH7	alcohol dehydrogenase 7	K18857	alcohol dehydrogenase class-P	EC:1.1.1.1	vvi00592	alpha-Linolenic acid metabolism	Metabolism	Lipid metabolism
TRINITY_DN26958_c0_g4	vvi:100232857	60.8	3.5e-21	ADH7	alcohol dehydrogenase 7	K18857	alcohol dehydrogenase class-P	EC:1.1.1.1	vvi00350	Tyrosine metabolism	Metabolism	Amino acid metabolism
TRINITY_DN26958_c0_g5	zma:100192545	50.9	1.5e-13	-	uncharacterized LOC100192545	K14758	casein kinase I homolog HRR25	EC:2.7.11.1	zma03008	Ribosome biogenesis in eukaryotes	Genetic Information Processing	Translation
TRINITY_DN26959_c0_g3	pper:PRUPE_ppa007115mg	82.4	1.4e-28	-	hypothetical protein	K10882	crossover junction endonuclease EME1	EC:3.1.22.-	pper03440	Homologous recombination	Genetic Information Processing	Replication and repair
TRINITY_DN26959_c0_g4	fve:101311611	91.9	6.5e-205	-	crossover junction endonuclease EME1B-like	K10882	crossover junction endonuclease EME1	EC:3.1.22.-	fve03440	Homologous recombination	Genetic Information Processing	Replication and repair
TRINITY_DN26960_c0_g1	fve:101310331	87	1.6e-90	-	cytochrome P450 CYP749A22-like	K15639	PHYB activation tagged suppressor 1	EC:1.14.-.-	fve00905	Brassinosteroid biosynthesis	Metabolism	Metabolism of terpenoids and polyketides
TRINITY_DN26960_c0_g10	fve:101302926	92	2.3e-34	-	cytochrome P450 CYP749A22-like	K15639	PHYB activation tagged suppressor 1	EC:1.14.-.-	fve00905	Brassinosteroid biosynthesis	Metabolism	Metabolism of terpenoids and polyketides
TRINITY_DN26960_c0_g11	fve:101310331	79.4	2.9e-124	-	cytochrome P450 CYP749A22-like	K15639	PHYB activation tagged suppressor 1	EC:1.14.-.-	fve00905	Brassinosteroid biosynthesis	Metabolism	Metabolism of terpenoids and polyketides
TRINITY_DN26960_c0_g2	pmum:103342103	70.3	4.6e-214	-	cytochrome P450 CYP749A22-like	K15639	PHYB activation tagged suppressor 1	EC:1.14.-.-	pmum00905	Brassinosteroid biosynthesis	Metabolism	Metabolism of terpenoids and polyketides
TRINITY_DN26960_c0_g3	pmum:103342103	75.8	4.1e-128	-	cytochrome P450 CYP749A22-like	K15639	PHYB activation tagged suppressor 1	EC:1.14.-.-	pmum00905	Brassinosteroid biosynthesis	Metabolism	Metabolism of terpenoids and polyketides
TRINITY_DN26960_c0_g4	mdm:103452311	74.4	2.6e-33	-	uncharacterized LOC103452311	K15639	PHYB activation tagged suppressor 1	EC:1.14.-.-	mdm00905	Brassinosteroid biosynthesis	Metabolism	Metabolism of terpenoids and polyketides
TRINITY_DN26960_c0_g7	pmum:103342103	69.9	1.1e-103	-	cytochrome P450 CYP749A22-like	K15639	PHYB activation tagged suppressor 1	EC:1.14.-.-	pmum00905	Brassinosteroid biosynthesis	Metabolism	Metabolism of terpenoids and polyketides
TRINITY_DN26960_c0_g8	fve:101302926	71.6	7e-76	-	cytochrome P450 CYP749A22-like	K15639	PHYB activation tagged suppressor 1	EC:1.14.-.-	fve00905	Brassinosteroid biosynthesis	Metabolism	Metabolism of terpenoids and polyketides
TRINITY_DN26960_c0_g9	fve:101303120	80.3	2e-51	-	cytochrome P450 CYP749A22-like	K15639	PHYB activation tagged suppressor 1	EC:1.14.-.-	fve00905	Brassinosteroid biosynthesis	Metabolism	Metabolism of terpenoids and polyketides
TRINITY_DN26964_c1_g1	fve:101293299	94.2	7.5e-154	-	probable cyclic nucleotide-gated ion channel 20	K05391	cyclic nucleotide gated channel, other eukaryote	-	fve04626	Plant-pathogen interaction	Organismal Systems	Environmental adaptation
TRINITY_DN26964_c1_g3	sita:101763429	82.6	3e-28	-	probable cyclic nucleotide-gated ion channel 20	K05391	cyclic nucleotide gated channel, other eukaryote	-	sita04626	Plant-pathogen interaction	Organismal Systems	Environmental adaptation
TRINITY_DN26964_c1_g4	sly:100736467	62	6.6e-101	SERK3A	somatic embryogenesis receptor kinase 3A	K13416	brassinosteroid insensitive 1-associated receptor kinase 1	EC:2.7.10.1 2.7.11.1	sly04075	Plant hormone signal transduction	Environmental Information Processing	Signal transduction
TRINITY_DN26964_c1_g4	sly:100736467	62	6.6e-101	SERK3A	somatic embryogenesis receptor kinase 3A	K13416	brassinosteroid insensitive 1-associated receptor kinase 1	EC:2.7.10.1 2.7.11.1	sly04626	Plant-pathogen interaction	Organismal Systems	Environmental adaptation
TRINITY_DN26964_c1_g6	bvg:104905769	36.4	2.1e-08	-	BRASSINOSTEROID INSENSITIVE 1-associated receptor kinase 1-like	K13416	brassinosteroid insensitive 1-associated receptor kinase 1	EC:2.7.10.1 2.7.11.1	bvg04075	Plant hormone signal transduction	Environmental Information Processing	Signal transduction
TRINITY_DN26964_c1_g6	bvg:104905769	36.4	2.1e-08	-	BRASSINOSTEROID INSENSITIVE 1-associated receptor kinase 1-like	K13416	brassinosteroid insensitive 1-associated receptor kinase 1	EC:2.7.10.1 2.7.11.1	bvg04626	Plant-pathogen interaction	Organismal Systems	Environmental adaptation
TRINITY_DN26964_c1_g8	mus:103969554	77.1	8.3e-43	-	probable cyclic nucleotide-gated ion channel 20	K05391	cyclic nucleotide gated channel, other eukaryote	-	mus04626	Plant-pathogen interaction	Organismal Systems	Environmental adaptation
TRINITY_DN26964_c1_g9	pvu:PHAVU_002G206900g	41.2	2.8e-09	-	hypothetical protein	K13416	brassinosteroid insensitive 1-associated receptor kinase 1	EC:2.7.10.1 2.7.11.1	pvu04075	Plant hormone signal transduction	Environmental Information Processing	Signal transduction
TRINITY_DN26964_c1_g9	pvu:PHAVU_002G206900g	41.2	2.8e-09	-	hypothetical protein	K13416	brassinosteroid insensitive 1-associated receptor kinase 1	EC:2.7.10.1 2.7.11.1	pvu04626	Plant-pathogen interaction	Organismal Systems	Environmental adaptation
TRINITY_DN26966_c0_g1	sot:107058339	37.7	2.9e-58	-	methylecgonone reductase-like	K00011	aldehyde reductase	EC:1.1.1.21	sot00040	Pentose and glucuronate interconversions	Metabolism	Carbohydrate metabolism
TRINITY_DN26966_c0_g1	sot:107058339	37.7	2.9e-58	-	methylecgonone reductase-like	K00011	aldehyde reductase	EC:1.1.1.21	sot00051	Fructose and mannose metabolism	Metabolism	Carbohydrate metabolism
TRINITY_DN26966_c0_g1	sot:107058339	37.7	2.9e-58	-	methylecgonone reductase-like	K00011	aldehyde reductase	EC:1.1.1.21	sot00052	Galactose metabolism	Metabolism	Carbohydrate metabolism
TRINITY_DN26966_c0_g1	sot:107058339	37.7	2.9e-58	-	methylecgonone reductase-like	K00011	aldehyde reductase	EC:1.1.1.21	sot00561	Glycerolipid metabolism	Metabolism	Lipid metabolism
TRINITY_DN26967_c0_g1	sbi:SORBI_07g003460	59.7	1.1e-17	SORBIDRAFT_07g003460	hypothetical protein	K04715	ceramide kinase	EC:2.7.1.138	sbi00600	Sphingolipid metabolism	Metabolism	Lipid metabolism
TRINITY_DN26967_c1_g1	fve:101292913	91.5	1.6e-179	-	aspartate--tRNA ligase	K01876	aspartyl-tRNA synthetase	EC:6.1.1.12	fve00970	Aminoacyl-tRNA biosynthesis	Genetic Information Processing	Translation
TRINITY_DN26967_c1_g2	smo:SELMODRAFT_123514	48.2	6.8e-142	-	hypothetical protein	K04718	sphingosine kinase	EC:2.7.1.91	smo00600	Sphingolipid metabolism	Metabolism	Lipid metabolism
TRINITY_DN26967_c1_g3	bdi:106866148	46.1	2.6e-15	-	31 kDa ribonucleoprotein	K12831	splicing factor 3B subunit 4	-	bdi03040	Spliceosome	Genetic Information Processing	Transcription
TRINITY_DN26967_c1_g6	nnu:104611773	84.6	1.1e-239	-	aspartate--tRNA ligase	K01876	aspartyl-tRNA synthetase	EC:6.1.1.12	nnu00970	Aminoacyl-tRNA biosynthesis	Genetic Information Processing	Translation
TRINITY_DN26968_c0_g2	fve:101314222	91.1	4.3e-267	-	multiple inositol polyphosphate phosphatase 1	K03103	multiple inositol-polyphosphate phosphatase / 2,3-bisphosphoglycerate 3-phosphatase	EC:3.1.3.62 3.1.3.80	fve00010	Glycolysis / Gluconeogenesis	Metabolism	Carbohydrate metabolism
TRINITY_DN26968_c0_g2	fve:101314222	91.1	4.3e-267	-	multiple inositol polyphosphate phosphatase 1	K03103	multiple inositol-polyphosphate phosphatase / 2,3-bisphosphoglycerate 3-phosphatase	EC:3.1.3.62 3.1.3.80	fve00562	Inositol phosphate metabolism	Metabolism	Carbohydrate metabolism
TRINITY_DN26971_c0_g1	cic:CICLE_v10027727mg	35.7	7.8e-51	-	hypothetical protein	K00679	phospholipid:diacylglycerol acyltransferase	EC:2.3.1.158	cic00561	Glycerolipid metabolism	Metabolism	Lipid metabolism
TRINITY_DN26973_c0_g1	fve:101309216	96.7	5.3e-80	-	ferredoxin	K02639	ferredoxin	-	fve00195	Photosynthesis	Metabolism	Energy metabolism
TRINITY_DN26977_c0_g1	fve:101291608	100	4.8e-22	-	non-specific phospholipase C1	K01114	phospholipase C	EC:3.1.4.3	fve00562	Inositol phosphate metabolism	Metabolism	Carbohydrate metabolism
TRINITY_DN26977_c0_g1	fve:101291608	100	4.8e-22	-	non-specific phospholipase C1	K01114	phospholipase C	EC:3.1.4.3	fve00564	Glycerophospholipid metabolism	Metabolism	Lipid metabolism
TRINITY_DN26977_c0_g1	fve:101291608	100	4.8e-22	-	non-specific phospholipase C1	K01114	phospholipase C	EC:3.1.4.3	fve00565	Ether lipid metabolism	Metabolism	Lipid metabolism
TRINITY_DN26977_c0_g2	fve:101291608	93.9	4e-237	-	non-specific phospholipase C1	K01114	phospholipase C	EC:3.1.4.3	fve00562	Inositol phosphate metabolism	Metabolism	Carbohydrate metabolism
TRINITY_DN26977_c0_g2	fve:101291608	93.9	4e-237	-	non-specific phospholipase C1	K01114	phospholipase C	EC:3.1.4.3	fve00564	Glycerophospholipid metabolism	Metabolism	Lipid metabolism
TRINITY_DN26977_c0_g2	fve:101291608	93.9	4e-237	-	non-specific phospholipase C1	K01114	phospholipase C	EC:3.1.4.3	fve00565	Ether lipid metabolism	Metabolism	Lipid metabolism
TRINITY_DN26978_c0_g1	zma:541977	42.9	6.4e-75	bx6	benzoxazin 6	K13229	2,4-dihydroxy-1,4-benzoxazin-3-one-glucoside dioxygenase	EC:1.14.20.2	zma00402	Benzoxazinoid biosynthesis	Metabolism	Biosynthesis of other secondary metabolites
TRINITY_DN26978_c0_g2	zma:541977	47	3.5e-90	bx6	benzoxazin 6	K13229	2,4-dihydroxy-1,4-benzoxazin-3-one-glucoside dioxygenase	EC:1.14.20.2	zma00402	Benzoxazinoid biosynthesis	Metabolism	Biosynthesis of other secondary metabolites
TRINITY_DN26978_c0_g6	pper:PRUPE_ppa008322mg	32.6	1.1e-45	-	hypothetical protein	K05278	flavonol synthase	EC:1.14.11.23	pper00941	Flavonoid biosynthesis	Metabolism	Biosynthesis of other secondary metabolites
TRINITY_DN26978_c0_g7	zma:541977	52.2	3.1e-31	bx6	benzoxazin 6	K13229	2,4-dihydroxy-1,4-benzoxazin-3-one-glucoside dioxygenase	EC:1.14.20.2	zma00402	Benzoxazinoid biosynthesis	Metabolism	Biosynthesis of other secondary metabolites
TRINITY_DN26978_c0_g8	gra:105792153	38.8	1.5e-67	-	leucoanthocyanidin dioxygenase-like	K05277	leucoanthocyanidin dioxygenase	EC:1.14.11.19	gra00941	Flavonoid biosynthesis	Metabolism	Biosynthesis of other secondary metabolites
TRINITY_DN26979_c0_g1	fve:101296028	83.4	1.2e-223	-	cytoplasmic tRNA 2-thiolation protein 2	K14169	cytoplasmic tRNA 2-thiolation protein 2	-	fve04122	Sulfur relay system	Genetic Information Processing	Folding, sorting and degradation
TRINITY_DN26982_c0_g5	sbi:SORBI_03g032990	32.7	1.7e-34	SORBIDRAFT_03g032990	hypothetical protein	K13415	protein brassinosteroid insensitive 1	EC:2.7.10.1 2.7.11.1	sbi04075	Plant hormone signal transduction	Environmental Information Processing	Signal transduction
TRINITY_DN26982_c0_g6	cit:102622554	41.2	2.3e-30	-	pentatricopeptide repeat-containing protein At4g16470-like	K00857	thymidine kinase	EC:2.7.1.21	cit00240	Pyrimidine metabolism	Metabolism	Nucleotide metabolism
TRINITY_DN26984_c0_g1	spen:107007029	46.9	6.3e-100	-	micronuclear linker histone polyprotein-like	K14323	protein CASC3	-	spen03013	RNA transport	Genetic Information Processing	Translation
TRINITY_DN26984_c0_g1	spen:107007029	46.9	6.3e-100	-	micronuclear linker histone polyprotein-like	K14323	protein CASC3	-	spen03015	mRNA surveillance pathway	Genetic Information Processing	Translation
TRINITY_DN26985_c0_g1	fve:101292712	84	7.3e-125	-	riboflavin synthase	K00793	riboflavin synthase	EC:2.5.1.9	fve00740	Riboflavin metabolism	Metabolism	Metabolism of cofactors and vitamins
TRINITY_DN26985_c0_g2	vvi:100257400	84.2	4.6e-44	-	riboflavin synthase	K00793	riboflavin synthase	EC:2.5.1.9	vvi00740	Riboflavin metabolism	Metabolism	Metabolism of cofactors and vitamins
TRINITY_DN26987_c0_g3	thj:104815985	26.6	7.5e-32	-	40S ribosomal protein S15-4-like	K02958	small subunit ribosomal protein S15e	-	thj03010	Ribosome	Genetic Information Processing	Translation
TRINITY_DN26988_c0_g1	rcu:RCOM_1433890	93.1	3.1e-88	-	60S ribosomal protein L18	K02883	large subunit ribosomal protein L18e	-	rcu03010	Ribosome	Genetic Information Processing	Translation
TRINITY_DN26990_c0_g2	nnu:104586001	44.4	8.1e-15	-	ubiquitin-conjugating enzyme E2 11-like	K06689	ubiquitin-conjugating enzyme E2 D/E	EC:2.3.2.23	nnu04141	Protein processing in endoplasmic reticulum	Genetic Information Processing	Folding, sorting and degradation
TRINITY_DN26990_c0_g2	nnu:104586001	44.4	8.1e-15	-	ubiquitin-conjugating enzyme E2 11-like	K06689	ubiquitin-conjugating enzyme E2 D/E	EC:2.3.2.23	nnu04120	Ubiquitin mediated proteolysis	Genetic Information Processing	Folding, sorting and degradation
TRINITY_DN26991_c0_g1	smo:SELMODRAFT_169811	53.7	2.4e-18	-	hypothetical protein	K12741	heterogeneous nuclear ribonucleoprotein A1/A3	-	smo03040	Spliceosome	Genetic Information Processing	Transcription
TRINITY_DN26993_c0_g2	fve:101309240	96.1	1.4e-277	-	glucan endo-1	K19893	glucan endo-1,3-beta-glucosidase 5/6	EC:3.2.1.39	fve00500	Starch and sucrose metabolism	Metabolism	Carbohydrate metabolism
TRINITY_DN26993_c0_g3	smo:SELMODRAFT_450549	45.4	1.6e-69	CCR1-1	cinnamoyl-CoA reductase	K09753	cinnamoyl-CoA reductase	EC:1.2.1.44	smo00940	Phenylpropanoid biosynthesis	Metabolism	Biosynthesis of other secondary metabolites
TRINITY_DN26993_c0_g7	ath:AT5G62430	76	7.8e-06	CDF1	cycling DOF factor 1	K16222	Dof zinc finger protein DOF5.5	-	ath04712	Circadian rhythm - plant	Organismal Systems	Environmental adaptation
TRINITY_DN26993_c0_g8	smo:SELMODRAFT_450549	44.3	1.1e-66	CCR1-1	cinnamoyl-CoA reductase	K09753	cinnamoyl-CoA reductase	EC:1.2.1.44	smo00940	Phenylpropanoid biosynthesis	Metabolism	Biosynthesis of other secondary metabolites
TRINITY_DN26995_c1_g13	gmx:547790	47.9	9.8e-24	SPK-1	protein kinase	K14498	serine/threonine-protein kinase SRK2	EC:2.7.11.1	gmx04075	Plant hormone signal transduction	Environmental Information Processing	Signal transduction
TRINITY_DN26995_c1_g3	fve:101303478	97	1.1e-128	-	proteasome subunit beta type-6	K02738	20S proteasome subunit beta 1	EC:3.4.25.1	fve03050	Proteasome	Genetic Information Processing	Folding, sorting and degradation
TRINITY_DN26995_c1_g8	sbi:SORBI_08g019700	42.6	1.7e-15	SORBIDRAFT_08g019700	hypothetical protein	K14498	serine/threonine-protein kinase SRK2	EC:2.7.11.1	sbi04075	Plant hormone signal transduction	Environmental Information Processing	Signal transduction
TRINITY_DN26996_c0_g5	fve:101306907	90	0	-	ATP-dependent DNA helicase 2 subunit KU70	K10884	ATP-dependent DNA helicase 2 subunit 1	-	fve03450	Non-homologous end-joining	Genetic Information Processing	Replication and repair
TRINITY_DN26998_c1_g4	mtr:MTR_2g040220	45.1	4.6e-156	-	HSPA4 nucleotide-binding domain protein	K03283	heat shock 70kDa protein 1/8	-	mtr03040	Spliceosome	Genetic Information Processing	Transcription
TRINITY_DN26998_c1_g4	mtr:MTR_2g040220	45.1	4.6e-156	-	HSPA4 nucleotide-binding domain protein	K03283	heat shock 70kDa protein 1/8	-	mtr04141	Protein processing in endoplasmic reticulum	Genetic Information Processing	Folding, sorting and degradation
TRINITY_DN26998_c1_g4	mtr:MTR_2g040220	45.1	4.6e-156	-	HSPA4 nucleotide-binding domain protein	K03283	heat shock 70kDa protein 1/8	-	mtr04144	Endocytosis	Cellular Processes	Transport and catabolism
TRINITY_DN26998_c1_g5	mpp:MICPUCDRAFT_56959	26.7	3.8e-07	-	glycosyltransferase family 4 protein	K06119	sulfoquinovosyltransferase	EC:2.4.1.-	mpp00561	Glycerolipid metabolism	Metabolism	Lipid metabolism
TRINITY_DN26999_c0_g1	egu:105050072	41.7	1.4e-10	-	lipase-like PAD4	K18875	enhanced disease susceptibility 1 protein	-	egu04626	Plant-pathogen interaction	Organismal Systems	Environmental adaptation
TRINITY_DN269_c0_g1	csl:COCSUDRAFT_56339	37.5	4.9e-07	-	hypothetical protein	K14304	nuclear pore complex protein Nup85	-	csl03013	RNA transport	Genetic Information Processing	Translation
TRINITY_DN26_c0_g1	vra:106778599	94.8	1.7e-37	-	ketol-acid reductoisomerase	K00053	ketol-acid reductoisomerase	EC:1.1.1.86	vra01210	2-Oxocarboxylic acid metabolism	Metabolism	Overview
TRINITY_DN26_c0_g1	vra:106778599	94.8	1.7e-37	-	ketol-acid reductoisomerase	K00053	ketol-acid reductoisomerase	EC:1.1.1.86	vra01230	Biosynthesis of amino acids	Metabolism	Overview
TRINITY_DN26_c0_g1	vra:106778599	94.8	1.7e-37	-	ketol-acid reductoisomerase	K00053	ketol-acid reductoisomerase	EC:1.1.1.86	vra00290	Valine, leucine and isoleucine biosynthesis	Metabolism	Amino acid metabolism
TRINITY_DN26_c0_g1	vra:106778599	94.8	1.7e-37	-	ketol-acid reductoisomerase	K00053	ketol-acid reductoisomerase	EC:1.1.1.86	vra00770	Pantothenate and CoA biosynthesis	Metabolism	Metabolism of cofactors and vitamins
TRINITY_DN27001_c0_g2	smo:SELMODRAFT_450159	37.1	4.1e-30	BAHDe1-1	BAHD family acyltransferase, clade V	K15400	omega-hydroxypalmitate O-feruloyl transferase	EC:2.3.1.188	smo00073	Cutin, suberine and wax biosynthesis	Metabolism	Lipid metabolism
TRINITY_DN27001_c1_g1	fve:101309283	96.1	2.9e-129	-	acyl-protein thioesterase 2	K06130	lysophospholipase II	EC:3.1.1.5	fve00564	Glycerophospholipid metabolism	Metabolism	Lipid metabolism
TRINITY_DN27001_c1_g3	pda:103708784	86.8	3.2e-135	-	acyl-protein thioesterase 2	K06130	lysophospholipase II	EC:3.1.1.5	pda00564	Glycerophospholipid metabolism	Metabolism	Lipid metabolism
TRINITY_DN27003_c0_g1	fve:101296893	91	3.6e-302	-	cytochrome P450 86A8-like	K15398	fatty acid omega-hydroxylase	EC:1.14.-.-	fve00073	Cutin, suberine and wax biosynthesis	Metabolism	Lipid metabolism
TRINITY_DN27004_c0_g2	fve:101308723	85.6	7.1e-136	-	3-hydroxy-3-methylglutaryl-coenzyme A reductase 1-like	K00021	hydroxymethylglutaryl-CoA reductase (NADPH)	EC:1.1.1.34	fve00900	Terpenoid backbone biosynthesis	Metabolism	Metabolism of terpenoids and polyketides
TRINITY_DN27005_c1_g1	mdm:103433959	86.7	5.2e-248	-	serine--tRNA ligase-like	K01875	seryl-tRNA synthetase	EC:6.1.1.11	mdm00970	Aminoacyl-tRNA biosynthesis	Genetic Information Processing	Translation
TRINITY_DN27006_c0_g1	pda:103697129	68.4	5.9e-113	-	probable 6-phosphogluconolactonase 4	K01057	6-phosphogluconolactonase	EC:3.1.1.31	pda01200	Carbon metabolism	Metabolism	Overview
TRINITY_DN27006_c0_g1	pda:103697129	68.4	5.9e-113	-	probable 6-phosphogluconolactonase 4	K01057	6-phosphogluconolactonase	EC:3.1.1.31	pda00030	Pentose phosphate pathway	Metabolism	Carbohydrate metabolism
TRINITY_DN27007_c0_g1	mdm:103410473	38.4	7.1e-41	-	G-type lectin S-receptor-like serine/threonine-protein kinase RKS1	K05349	beta-glucosidase	EC:3.2.1.21	mdm00500	Starch and sucrose metabolism	Metabolism	Carbohydrate metabolism
TRINITY_DN27007_c0_g1	mdm:103410473	38.4	7.1e-41	-	G-type lectin S-receptor-like serine/threonine-protein kinase RKS1	K05349	beta-glucosidase	EC:3.2.1.21	mdm00460	Cyanoamino acid metabolism	Metabolism	Metabolism of other amino acids
TRINITY_DN27007_c0_g1	mdm:103410473	38.4	7.1e-41	-	G-type lectin S-receptor-like serine/threonine-protein kinase RKS1	K05349	beta-glucosidase	EC:3.2.1.21	mdm00940	Phenylpropanoid biosynthesis	Metabolism	Biosynthesis of other secondary metabolites
TRINITY_DN27007_c0_g3	gra:105783845	45.2	4.6e-18	-	wall-associated receptor kinase-like 10	-	-	-	gra00520	Amino sugar and nucleotide sugar metabolism	Metabolism	Carbohydrate metabolism
TRINITY_DN27007_c0_g5	mdm:103410473	52.4	2.1e-113	-	G-type lectin S-receptor-like serine/threonine-protein kinase RKS1	K05349	beta-glucosidase	EC:3.2.1.21	mdm00500	Starch and sucrose metabolism	Metabolism	Carbohydrate metabolism
TRINITY_DN27007_c0_g5	mdm:103410473	52.4	2.1e-113	-	G-type lectin S-receptor-like serine/threonine-protein kinase RKS1	K05349	beta-glucosidase	EC:3.2.1.21	mdm00460	Cyanoamino acid metabolism	Metabolism	Metabolism of other amino acids
TRINITY_DN27007_c0_g5	mdm:103410473	52.4	2.1e-113	-	G-type lectin S-receptor-like serine/threonine-protein kinase RKS1	K05349	beta-glucosidase	EC:3.2.1.21	mdm00940	Phenylpropanoid biosynthesis	Metabolism	Biosynthesis of other secondary metabolites
TRINITY_DN27007_c0_g6	mdm:103410473	46.1	3e-37	-	G-type lectin S-receptor-like serine/threonine-protein kinase RKS1	K05349	beta-glucosidase	EC:3.2.1.21	mdm00500	Starch and sucrose metabolism	Metabolism	Carbohydrate metabolism
TRINITY_DN27007_c0_g6	mdm:103410473	46.1	3e-37	-	G-type lectin S-receptor-like serine/threonine-protein kinase RKS1	K05349	beta-glucosidase	EC:3.2.1.21	mdm00460	Cyanoamino acid metabolism	Metabolism	Metabolism of other amino acids
TRINITY_DN27007_c0_g6	mdm:103410473	46.1	3e-37	-	G-type lectin S-receptor-like serine/threonine-protein kinase RKS1	K05349	beta-glucosidase	EC:3.2.1.21	mdm00940	Phenylpropanoid biosynthesis	Metabolism	Biosynthesis of other secondary metabolites
TRINITY_DN27007_c0_g7	mdm:103410473	52.6	2.5e-109	-	G-type lectin S-receptor-like serine/threonine-protein kinase RKS1	K05349	beta-glucosidase	EC:3.2.1.21	mdm00500	Starch and sucrose metabolism	Metabolism	Carbohydrate metabolism
TRINITY_DN27007_c0_g7	mdm:103410473	52.6	2.5e-109	-	G-type lectin S-receptor-like serine/threonine-protein kinase RKS1	K05349	beta-glucosidase	EC:3.2.1.21	mdm00460	Cyanoamino acid metabolism	Metabolism	Metabolism of other amino acids
TRINITY_DN27007_c0_g7	mdm:103410473	52.6	2.5e-109	-	G-type lectin S-receptor-like serine/threonine-protein kinase RKS1	K05349	beta-glucosidase	EC:3.2.1.21	mdm00940	Phenylpropanoid biosynthesis	Metabolism	Biosynthesis of other secondary metabolites
TRINITY_DN27009_c0_g12	egu:105049952	73.4	6.2e-25	-	heterogeneous nuclear ribonucleoprotein 1-like	K12741	heterogeneous nuclear ribonucleoprotein A1/A3	-	egu03040	Spliceosome	Genetic Information Processing	Transcription
TRINITY_DN27009_c0_g4	smo:SELMODRAFT_268342	69.7	5.8e-06	-	hypothetical protein	K05670	ATP-binding cassette, subfamily C (CFTR/MRP), member 13	-	smo02010	ABC transporters	Environmental Information Processing	Membrane transport
TRINITY_DN27009_c0_g7	smo:SELMODRAFT_268342	71.1	2.6e-40	-	hypothetical protein	K05670	ATP-binding cassette, subfamily C (CFTR/MRP), member 13	-	smo02010	ABC transporters	Environmental Information Processing	Membrane transport
TRINITY_DN27009_c0_g9	vra:106773074	46.8	5.5e-06	-	ABC transporter C family member 8-like	K05665	ATP-binding cassette, subfamily C (CFTR/MRP), member 1	-	vra02010	ABC transporters	Environmental Information Processing	Membrane transport
TRINITY_DN27014_c0_g1	pxb:103959806	37.5	6.6e-76	-	disease resistance protein RPP8-like	K13457	disease resistance protein RPM1	-	pxb04626	Plant-pathogen interaction	Organismal Systems	Environmental adaptation
TRINITY_DN27015_c0_g2	vcn:VOLCADRAFT_77867	28.8	8.4e-35	-	hypothetical protein	K12858	ATP-dependent RNA helicase DDX23/PRP28	EC:3.6.4.13	vcn03040	Spliceosome	Genetic Information Processing	Transcription
TRINITY_DN27016_c0_g3	nnu:104594284	87.2	2.5e-84	-	heterogeneous nuclear ribonucleoprotein 1	K12741	heterogeneous nuclear ribonucleoprotein A1/A3	-	nnu03040	Spliceosome	Genetic Information Processing	Transcription
TRINITY_DN27016_c0_g4	fve:101304344	94.4	1.4e-138	-	methionine gamma-lyase	K01761	methionine-gamma-lyase	EC:4.4.1.11	fve00270	Cysteine and methionine metabolism	Metabolism	Amino acid metabolism
TRINITY_DN27016_c0_g4	fve:101304344	94.4	1.4e-138	-	methionine gamma-lyase	K01761	methionine-gamma-lyase	EC:4.4.1.11	fve00450	Selenocompound metabolism	Metabolism	Metabolism of other amino acids
TRINITY_DN27016_c0_g5	fve:101298011	71.2	3.7e-47	-	uncharacterized LOC101298011	K02911	large subunit ribosomal protein L32	-	fve03010	Ribosome	Genetic Information Processing	Translation
TRINITY_DN27016_c0_g6	fve:101298011	85.2	3e-63	-	uncharacterized LOC101298011	K02911	large subunit ribosomal protein L32	-	fve03010	Ribosome	Genetic Information Processing	Translation
TRINITY_DN27016_c0_g7	nnu:104593448	84.4	1.2e-165	-	methionine gamma-lyase	K01761	methionine-gamma-lyase	EC:4.4.1.11	nnu00270	Cysteine and methionine metabolism	Metabolism	Amino acid metabolism
TRINITY_DN27016_c0_g7	nnu:104593448	84.4	1.2e-165	-	methionine gamma-lyase	K01761	methionine-gamma-lyase	EC:4.4.1.11	nnu00450	Selenocompound metabolism	Metabolism	Metabolism of other amino acids
TRINITY_DN27016_c0_g8	cit:102609475	98.5	2.3e-32	-	methionine gamma-lyase-like	K01761	methionine-gamma-lyase	EC:4.4.1.11	cit00270	Cysteine and methionine metabolism	Metabolism	Amino acid metabolism
TRINITY_DN27016_c0_g8	cit:102609475	98.5	2.3e-32	-	methionine gamma-lyase-like	K01761	methionine-gamma-lyase	EC:4.4.1.11	cit00450	Selenocompound metabolism	Metabolism	Metabolism of other amino acids
TRINITY_DN27018_c0_g10	ath:AT1G22400	58	5.4e-45	UGT85A1	UDP-glycosyltransferase 85A1	-	-	-	ath00908	Zeatin biosynthesis	Metabolism	Metabolism of terpenoids and polyketides
TRINITY_DN27018_c0_g7	fve:101304654	93.4	5.1e-153	-	UBA and UBX domain-containing protein At4g15410	K14012	UBX domain-containing protein 1	-	fve04141	Protein processing in endoplasmic reticulum	Genetic Information Processing	Folding, sorting and degradation
TRINITY_DN27018_c0_g8	ath:AT1G22400	66.5	1.3e-139	UGT85A1	UDP-glycosyltransferase 85A1	-	-	-	ath00908	Zeatin biosynthesis	Metabolism	Metabolism of terpenoids and polyketides
TRINITY_DN27018_c0_g9	egu:105041866	49.4	9.7e-14	-	uncharacterized LOC105041866	K07466	replication factor A1	-	egu03030	DNA replication	Genetic Information Processing	Replication and repair
TRINITY_DN27018_c0_g9	egu:105041866	49.4	9.7e-14	-	uncharacterized LOC105041866	K07466	replication factor A1	-	egu03420	Nucleotide excision repair	Genetic Information Processing	Replication and repair
TRINITY_DN27018_c0_g9	egu:105041866	49.4	9.7e-14	-	uncharacterized LOC105041866	K07466	replication factor A1	-	egu03430	Mismatch repair	Genetic Information Processing	Replication and repair
TRINITY_DN27018_c0_g9	egu:105041866	49.4	9.7e-14	-	uncharacterized LOC105041866	K07466	replication factor A1	-	egu03440	Homologous recombination	Genetic Information Processing	Replication and repair
TRINITY_DN2701_c0_g1	thj:104825067	76.2	4.4e-33	-	probable UMP-CMP kinase 2	K13800	UMP-CMP kinase	EC:2.7.4.- 2.7.4.14	thj00240	Pyrimidine metabolism	Metabolism	Nucleotide metabolism
TRINITY_DN27021_c1_g1	fve:101303212	87.1	1.5e-162	-	cytochrome P450 CYP749A22-like	K15639	PHYB activation tagged suppressor 1	EC:1.14.-.-	fve00905	Brassinosteroid biosynthesis	Metabolism	Metabolism of terpenoids and polyketides
TRINITY_DN27021_c1_g3	pmum:103342103	68.4	5.5e-97	-	cytochrome P450 CYP749A22-like	K15639	PHYB activation tagged suppressor 1	EC:1.14.-.-	pmum00905	Brassinosteroid biosynthesis	Metabolism	Metabolism of terpenoids and polyketides
TRINITY_DN27021_c1_g4	fve:101303995	84.2	2.1e-45	-	cytochrome P450 CYP749A22-like	K15639	PHYB activation tagged suppressor 1	EC:1.14.-.-	fve00905	Brassinosteroid biosynthesis	Metabolism	Metabolism of terpenoids and polyketides
TRINITY_DN27021_c1_g5	fve:101302926	89.7	2.7e-158	-	cytochrome P450 CYP749A22-like	K15639	PHYB activation tagged suppressor 1	EC:1.14.-.-	fve00905	Brassinosteroid biosynthesis	Metabolism	Metabolism of terpenoids and polyketides
TRINITY_DN27022_c1_g1	smo:SELMODRAFT_10835	59.8	3.6e-139	-	hypothetical protein	K05681	ATP-binding cassette, subfamily G (WHITE), member 2	-	smo02010	ABC transporters	Environmental Information Processing	Membrane transport
TRINITY_DN27022_c1_g2	fve:101290969	92.3	3.2e-41	-	photosystem I reaction center subunit VI	K02695	photosystem I subunit VI	-	fve00195	Photosynthesis	Metabolism	Energy metabolism
TRINITY_DN27022_c1_g3	nnu:104595173	88.2	1.7e-68	-	photosystem I reaction center subunit VI	K02695	photosystem I subunit VI	-	nnu00195	Photosynthesis	Metabolism	Energy metabolism
TRINITY_DN27023_c0_g5	fve:101306250	93.8	4.9e-165	-	S-formylglutathione hydrolase	K01070	S-formylglutathione hydrolase	EC:3.1.2.12	fve01200	Carbon metabolism	Metabolism	Overview
TRINITY_DN27024_c1_g1	pxb:103942819	39	3.8e-17	-	cathepsin L1-like	K01365	cathepsin L	EC:3.4.22.15	pxb04145	Phagosome	Cellular Processes	Transport and catabolism
TRINITY_DN27025_c1_g2	thj:104802400	35.1	1.9e-65	-	DEAD-box ATP-dependent RNA helicase 14	K12823	ATP-dependent RNA helicase DDX5/DBP2	EC:3.6.4.13	thj03040	Spliceosome	Genetic Information Processing	Transcription
TRINITY_DN27026_c0_g1	cvr:CHLNCDRAFT_6734	43	1.9e-106	-	hypothetical protein	K00703	starch synthase	EC:2.4.1.21	cvr00500	Starch and sucrose metabolism	Metabolism	Carbohydrate metabolism
TRINITY_DN27027_c0_g2	cit:102624793	25.6	8.5e-76	-	topless-related protein 4-like	K14558	periodic tryptophan protein 2	-	cit03008	Ribosome biogenesis in eukaryotes	Genetic Information Processing	Translation
TRINITY_DN27027_c0_g3	fve:101314269	98.8	4e-43	-	autophagy-related protein 8i	K08341	GABA(A) receptor-associated protein	-	fve04140	Regulation of autophagy	Cellular Processes	Transport and catabolism
TRINITY_DN27029_c0_g1	csv:101222280	24.3	5.5e-11	-	protein CHROMATIN REMODELING 8	K10841	DNA excision repair protein ERCC-6	-	csv03420	Nucleotide excision repair	Genetic Information Processing	Replication and repair
TRINITY_DN27029_c0_g2	gmx:100776168	44.1	6.4e-49	-	26S proteasome regulatory subunit 4 homolog A	K03062	26S proteasome regulatory subunit T2	-	gmx03050	Proteasome	Genetic Information Processing	Folding, sorting and degradation
TRINITY_DN27032_c1_g1	fve:101310115	93.4	2.3e-129	-	adenylate kinase 4	K00939	adenylate kinase	EC:2.7.4.3	fve00230	Purine metabolism	Metabolism	Nucleotide metabolism
TRINITY_DN27035_c0_g1	pda:103721727	69.6	3.8e-108	-	shikimate kinase 3	K00891	shikimate kinase	EC:2.7.1.71	pda01230	Biosynthesis of amino acids	Metabolism	Overview
TRINITY_DN27035_c0_g1	pda:103721727	69.6	3.8e-108	-	shikimate kinase 3	K00891	shikimate kinase	EC:2.7.1.71	pda00400	Phenylalanine, tyrosine and tryptophan biosynthesis	Metabolism	Amino acid metabolism
TRINITY_DN27037_c0_g1	eus:EUTSA_v10004013mg	43.3	1.6e-106	-	hypothetical protein	K19891	glucan endo-1,3-beta-glucosidase 1/2/3	EC:3.2.1.39	eus00500	Starch and sucrose metabolism	Metabolism	Carbohydrate metabolism
TRINITY_DN27038_c1_g1	tcc:TCM_042532	85.2	6.7e-76	-	Cytochrome P450 superfamily protein isoform 1	K09588	cytochrome P450, family 90, subfamily A, polypeptide 1	EC:1.14.-.-	tcc00905	Brassinosteroid biosynthesis	Metabolism	Metabolism of terpenoids and polyketides
TRINITY_DN27038_c1_g2	nnu:104595015	86.4	3.8e-37	-	cytochrome P450 90A1-like	K09588	cytochrome P450, family 90, subfamily A, polypeptide 1	EC:1.14.-.-	nnu00905	Brassinosteroid biosynthesis	Metabolism	Metabolism of terpenoids and polyketides
TRINITY_DN27038_c3_g1	nnu:104601254	93.1	4.5e-32	-	cytochrome P450 90A1	K09588	cytochrome P450, family 90, subfamily A, polypeptide 1	EC:1.14.-.-	nnu00905	Brassinosteroid biosynthesis	Metabolism	Metabolism of terpenoids and polyketides
TRINITY_DN27038_c4_g6	apro:F751_1077	41.1	6.1e-08	-	Acyl carrier protein	K03955	NADH dehydrogenase (ubiquinone) 1 alpha/beta subcomplex 1	-	apro00190	Oxidative phosphorylation	Metabolism	Energy metabolism
TRINITY_DN27039_c0_g1	ath:AT2G19190	37.8	6.5e-55	FRK1	FLG22-induced receptor-like kinase 1	K16224	senescence-induced receptor-like serine/threonine-protein kinase	-	ath04626	Plant-pathogen interaction	Organismal Systems	Environmental adaptation
TRINITY_DN27040_c0_g1	sly:101254423	50.8	7.4e-87	-	uncharacterized LOC101254423	K00276	primary-amine oxidase	EC:1.4.3.21	sly00260	Glycine, serine and threonine metabolism	Metabolism	Amino acid metabolism
TRINITY_DN27040_c0_g1	sly:101254423	50.8	7.4e-87	-	uncharacterized LOC101254423	K00276	primary-amine oxidase	EC:1.4.3.21	sly00350	Tyrosine metabolism	Metabolism	Amino acid metabolism
TRINITY_DN27040_c0_g1	sly:101254423	50.8	7.4e-87	-	uncharacterized LOC101254423	K00276	primary-amine oxidase	EC:1.4.3.21	sly00360	Phenylalanine metabolism	Metabolism	Amino acid metabolism
TRINITY_DN27040_c0_g1	sly:101254423	50.8	7.4e-87	-	uncharacterized LOC101254423	K00276	primary-amine oxidase	EC:1.4.3.21	sly00410	beta-Alanine metabolism	Metabolism	Metabolism of other amino acids
TRINITY_DN27040_c0_g1	sly:101254423	50.8	7.4e-87	-	uncharacterized LOC101254423	K00276	primary-amine oxidase	EC:1.4.3.21	sly00950	Isoquinoline alkaloid biosynthesis	Metabolism	Biosynthesis of other secondary metabolites
TRINITY_DN27040_c0_g1	sly:101254423	50.8	7.4e-87	-	uncharacterized LOC101254423	K00276	primary-amine oxidase	EC:1.4.3.21	sly00960	Tropane, piperidine and pyridine alkaloid biosynthesis	Metabolism	Biosynthesis of other secondary metabolites
TRINITY_DN27040_c0_g2	sly:101254423	51	2.9e-21	-	uncharacterized LOC101254423	K00276	primary-amine oxidase	EC:1.4.3.21	sly00260	Glycine, serine and threonine metabolism	Metabolism	Amino acid metabolism
TRINITY_DN27040_c0_g2	sly:101254423	51	2.9e-21	-	uncharacterized LOC101254423	K00276	primary-amine oxidase	EC:1.4.3.21	sly00350	Tyrosine metabolism	Metabolism	Amino acid metabolism
TRINITY_DN27040_c0_g2	sly:101254423	51	2.9e-21	-	uncharacterized LOC101254423	K00276	primary-amine oxidase	EC:1.4.3.21	sly00360	Phenylalanine metabolism	Metabolism	Amino acid metabolism
TRINITY_DN27040_c0_g2	sly:101254423	51	2.9e-21	-	uncharacterized LOC101254423	K00276	primary-amine oxidase	EC:1.4.3.21	sly00410	beta-Alanine metabolism	Metabolism	Metabolism of other amino acids
TRINITY_DN27040_c0_g2	sly:101254423	51	2.9e-21	-	uncharacterized LOC101254423	K00276	primary-amine oxidase	EC:1.4.3.21	sly00950	Isoquinoline alkaloid biosynthesis	Metabolism	Biosynthesis of other secondary metabolites
TRINITY_DN27040_c0_g2	sly:101254423	51	2.9e-21	-	uncharacterized LOC101254423	K00276	primary-amine oxidase	EC:1.4.3.21	sly00960	Tropane, piperidine and pyridine alkaloid biosynthesis	Metabolism	Biosynthesis of other secondary metabolites
TRINITY_DN27042_c0_g2	fve:101302879	87.3	3.7e-152	-	E3 ubiquitin-protein ligase FANCL	K10606	E3 ubiquitin-protein ligase FANCL	EC:2.3.2.27	fve04120	Ubiquitin mediated proteolysis	Genetic Information Processing	Folding, sorting and degradation
TRINITY_DN27045_c0_g1	fve:101309791	98.4	4.3e-55	-	serine/arginine-rich splicing factor RSZ22-like	K12896	splicing factor, arginine/serine-rich 7	-	fve03040	Spliceosome	Genetic Information Processing	Transcription
TRINITY_DN27046_c0_g4	pda:103695950	70.2	8.3e-12	-	uncharacterized LOC103695950	K02975	small subunit ribosomal protein S25e	-	pda03010	Ribosome	Genetic Information Processing	Translation
TRINITY_DN27047_c0_g1	fve:101300415	91.1	0	-	uncharacterized LOC101300415	K14311	nuclear pore complex protein Nup188	-	fve03013	RNA transport	Genetic Information Processing	Translation
TRINITY_DN27051_c0_g1	rcu:RCOM_1152900	47.6	1.5e-78	-	cysteine protease	K01365	cathepsin L	EC:3.4.22.15	rcu04145	Phagosome	Cellular Processes	Transport and catabolism
TRINITY_DN27052_c0_g3	apro:F751_3184	29.8	3.4e-11	-	Vacuolar protein sorting-associated protein 45-like protein	K12479	vacuolar protein sorting-associated protein 45	-	apro04144	Endocytosis	Cellular Processes	Transport and catabolism
TRINITY_DN27055_c0_g8	bna:106392594	44.8	2.1e-102	-	uncharacterized LOC106392594	K00620	glutamate N-acetyltransferase / amino-acid N-acetyltransferase	EC:2.3.1.35 2.3.1.1	bna01210	2-Oxocarboxylic acid metabolism	Metabolism	Overview
TRINITY_DN27055_c0_g8	bna:106392594	44.8	2.1e-102	-	uncharacterized LOC106392594	K00620	glutamate N-acetyltransferase / amino-acid N-acetyltransferase	EC:2.3.1.35 2.3.1.1	bna01230	Biosynthesis of amino acids	Metabolism	Overview
TRINITY_DN27055_c0_g8	bna:106392594	44.8	2.1e-102	-	uncharacterized LOC106392594	K00620	glutamate N-acetyltransferase / amino-acid N-acetyltransferase	EC:2.3.1.35 2.3.1.1	bna00220	Arginine biosynthesis	Metabolism	Amino acid metabolism
TRINITY_DN27059_c1_g2	spen:107026625	39.8	1.8e-52	-	serine/threonine-protein kinase SAPK3-like	K14498	serine/threonine-protein kinase SRK2	EC:2.7.11.1	spen04075	Plant hormone signal transduction	Environmental Information Processing	Signal transduction
TRINITY_DN27062_c0_g1	csl:COCSUDRAFT_18080	35.4	5.2e-93	-	peptidase C19	K11839	ubiquitin carboxyl-terminal hydrolase 8	EC:3.4.19.12	csl04144	Endocytosis	Cellular Processes	Transport and catabolism
TRINITY_DN27063_c0_g1	ota:Ot14g02880	26.6	3.6e-20	-	putative xeroderma pigmentosum group C protein (ISS)	K10838	xeroderma pigmentosum group C-complementing protein	-	ota03420	Nucleotide excision repair	Genetic Information Processing	Replication and repair
TRINITY_DN27065_c0_g4	gmx:100794508	48.1	8.9e-70	-	G-type lectin S-receptor-like serine/threonine-protein kinase CES101	K01183	chitinase	EC:3.2.1.14	gmx00520	Amino sugar and nucleotide sugar metabolism	Metabolism	Carbohydrate metabolism
TRINITY_DN27065_c0_g5	gmx:100794508	32.3	1.8e-31	-	G-type lectin S-receptor-like serine/threonine-protein kinase CES101	K01183	chitinase	EC:3.2.1.14	gmx00520	Amino sugar and nucleotide sugar metabolism	Metabolism	Carbohydrate metabolism
TRINITY_DN27065_c0_g6	sot:102590164	35.9	7.9e-09	-	chitinase-3-like protein 2	K01183	chitinase	EC:3.2.1.14	sot00520	Amino sugar and nucleotide sugar metabolism	Metabolism	Carbohydrate metabolism
TRINITY_DN27065_c0_g7	gra:105783845	66.7	4.6e-08	-	wall-associated receptor kinase-like 10	-	-	-	gra00520	Amino sugar and nucleotide sugar metabolism	Metabolism	Carbohydrate metabolism
TRINITY_DN27066_c0_g1	pper:PRUPE_ppa002052mg	84	1.3e-29	-	hypothetical protein	K10527	enoyl-CoA hydratase/3-hydroxyacyl-CoA dehydrogenase	EC:4.2.1.17 1.1.1.35 1.1.1.211	pper01212	Fatty acid metabolism	Metabolism	Overview
TRINITY_DN27066_c0_g1	pper:PRUPE_ppa002052mg	84	1.3e-29	-	hypothetical protein	K10527	enoyl-CoA hydratase/3-hydroxyacyl-CoA dehydrogenase	EC:4.2.1.17 1.1.1.35 1.1.1.211	pper00071	Fatty acid degradation	Metabolism	Lipid metabolism
TRINITY_DN27066_c0_g1	pper:PRUPE_ppa002052mg	84	1.3e-29	-	hypothetical protein	K10527	enoyl-CoA hydratase/3-hydroxyacyl-CoA dehydrogenase	EC:4.2.1.17 1.1.1.35 1.1.1.211	pper00592	alpha-Linolenic acid metabolism	Metabolism	Lipid metabolism
TRINITY_DN27066_c0_g2	fve:101294002	95.9	0	-	peroxisomal fatty acid beta-oxidation multifunctional protein AIM1	K10527	enoyl-CoA hydratase/3-hydroxyacyl-CoA dehydrogenase	EC:4.2.1.17 1.1.1.35 1.1.1.211	fve01212	Fatty acid metabolism	Metabolism	Overview
TRINITY_DN27066_c0_g2	fve:101294002	95.9	0	-	peroxisomal fatty acid beta-oxidation multifunctional protein AIM1	K10527	enoyl-CoA hydratase/3-hydroxyacyl-CoA dehydrogenase	EC:4.2.1.17 1.1.1.35 1.1.1.211	fve00071	Fatty acid degradation	Metabolism	Lipid metabolism
TRINITY_DN27066_c0_g2	fve:101294002	95.9	0	-	peroxisomal fatty acid beta-oxidation multifunctional protein AIM1	K10527	enoyl-CoA hydratase/3-hydroxyacyl-CoA dehydrogenase	EC:4.2.1.17 1.1.1.35 1.1.1.211	fve00592	alpha-Linolenic acid metabolism	Metabolism	Lipid metabolism
TRINITY_DN27066_c0_g3	nnu:104595160	86	1.2e-172	-	peroxisomal fatty acid beta-oxidation multifunctional protein AIM1	K10527	enoyl-CoA hydratase/3-hydroxyacyl-CoA dehydrogenase	EC:4.2.1.17 1.1.1.35 1.1.1.211	nnu01212	Fatty acid metabolism	Metabolism	Overview
TRINITY_DN27066_c0_g3	nnu:104595160	86	1.2e-172	-	peroxisomal fatty acid beta-oxidation multifunctional protein AIM1	K10527	enoyl-CoA hydratase/3-hydroxyacyl-CoA dehydrogenase	EC:4.2.1.17 1.1.1.35 1.1.1.211	nnu00071	Fatty acid degradation	Metabolism	Lipid metabolism
TRINITY_DN27066_c0_g3	nnu:104595160	86	1.2e-172	-	peroxisomal fatty acid beta-oxidation multifunctional protein AIM1	K10527	enoyl-CoA hydratase/3-hydroxyacyl-CoA dehydrogenase	EC:4.2.1.17 1.1.1.35 1.1.1.211	nnu00592	alpha-Linolenic acid metabolism	Metabolism	Lipid metabolism
TRINITY_DN27066_c0_g4	pper:PRUPE_ppa002052mg	76.7	6.1e-24	-	hypothetical protein	K10527	enoyl-CoA hydratase/3-hydroxyacyl-CoA dehydrogenase	EC:4.2.1.17 1.1.1.35 1.1.1.211	pper01212	Fatty acid metabolism	Metabolism	Overview
TRINITY_DN27066_c0_g4	pper:PRUPE_ppa002052mg	76.7	6.1e-24	-	hypothetical protein	K10527	enoyl-CoA hydratase/3-hydroxyacyl-CoA dehydrogenase	EC:4.2.1.17 1.1.1.35 1.1.1.211	pper00071	Fatty acid degradation	Metabolism	Lipid metabolism
TRINITY_DN27066_c0_g4	pper:PRUPE_ppa002052mg	76.7	6.1e-24	-	hypothetical protein	K10527	enoyl-CoA hydratase/3-hydroxyacyl-CoA dehydrogenase	EC:4.2.1.17 1.1.1.35 1.1.1.211	pper00592	alpha-Linolenic acid metabolism	Metabolism	Lipid metabolism
TRINITY_DN27068_c0_g1	ppp:PHYPADRAFT_13874	39	5.8e-68	-	hypothetical protein	K14494	DELLA protein	-	ppp04075	Plant hormone signal transduction	Environmental Information Processing	Signal transduction
TRINITY_DN27069_c1_g2	vcn:VOLCADRAFT_55911	44.1	2.3e-59	-	hypothetical protein	K06123	1-acylglycerone phosphate reductase	EC:1.1.1.101	vcn00564	Glycerophospholipid metabolism	Metabolism	Lipid metabolism
TRINITY_DN27069_c1_g2	vcn:VOLCADRAFT_55911	44.1	2.3e-59	-	hypothetical protein	K06123	1-acylglycerone phosphate reductase	EC:1.1.1.101	vcn00565	Ether lipid metabolism	Metabolism	Lipid metabolism
TRINITY_DN27071_c0_g3	fve:101295708	94.4	0	-	delta(24)-sterol reductase	K09828	Delta24-sterol reductase	EC:1.3.1.72 1.3.1.-	fve00100	Steroid biosynthesis	Metabolism	Lipid metabolism
TRINITY_DN27071_c0_g4	nnu:104611785	90.8	0	-	delta(24)-sterol reductase	K09828	Delta24-sterol reductase	EC:1.3.1.72 1.3.1.-	nnu00100	Steroid biosynthesis	Metabolism	Lipid metabolism
TRINITY_DN27073_c0_g1	mdm:103448436	59.3	8.1e-20	-	LRR receptor-like serine/threonine-protein kinase EFR	K13428	LRR receptor-like serine/threonine-protein kinase EFR	EC:2.7.11.1	mdm04626	Plant-pathogen interaction	Organismal Systems	Environmental adaptation
TRINITY_DN27073_c0_g2	mdm:103448436	55.6	5.4e-26	-	LRR receptor-like serine/threonine-protein kinase EFR	K13428	LRR receptor-like serine/threonine-protein kinase EFR	EC:2.7.11.1	mdm04626	Plant-pathogen interaction	Organismal Systems	Environmental adaptation
TRINITY_DN27073_c0_g5	mdm:103448436	67.2	9.9e-13	-	LRR receptor-like serine/threonine-protein kinase EFR	K13428	LRR receptor-like serine/threonine-protein kinase EFR	EC:2.7.11.1	mdm04626	Plant-pathogen interaction	Organismal Systems	Environmental adaptation
TRINITY_DN27073_c0_g6	mdm:103448436	66.3	8.4e-31	-	LRR receptor-like serine/threonine-protein kinase EFR	K13428	LRR receptor-like serine/threonine-protein kinase EFR	EC:2.7.11.1	mdm04626	Plant-pathogen interaction	Organismal Systems	Environmental adaptation
TRINITY_DN27073_c1_g1	brp:103845674	41.7	2.7e-43	-	LRR receptor-like serine/threonine-protein kinase EFR	K13428	LRR receptor-like serine/threonine-protein kinase EFR	EC:2.7.11.1	brp04626	Plant-pathogen interaction	Organismal Systems	Environmental adaptation
TRINITY_DN27073_c1_g2	pda:103721336	50.8	7.3e-46	-	uncharacterized LOC103721336	K01886	glutaminyl-tRNA synthetase	EC:6.1.1.18	pda00970	Aminoacyl-tRNA biosynthesis	Genetic Information Processing	Translation
TRINITY_DN27073_c1_g3	eus:EUTSA_v10015316mg	46.7	3.7e-81	-	hypothetical protein	K13428	LRR receptor-like serine/threonine-protein kinase EFR	EC:2.7.11.1	eus04626	Plant-pathogen interaction	Organismal Systems	Environmental adaptation
TRINITY_DN27074_c1_g5	fve:101292653	81.9	1.8e-205	-	WD repeat-containing protein RUP2	K10143	E3 ubiquitin-protein ligase RFWD2	EC:2.3.2.27	fve04120	Ubiquitin mediated proteolysis	Genetic Information Processing	Folding, sorting and degradation
TRINITY_DN27074_c1_g5	fve:101292653	81.9	1.8e-205	-	WD repeat-containing protein RUP2	K10143	E3 ubiquitin-protein ligase RFWD2	EC:2.3.2.27	fve04712	Circadian rhythm - plant	Organismal Systems	Environmental adaptation
TRINITY_DN27075_c2_g1	thj:104818029	29.7	5.4e-23	-	probable polygalacturonase At3g15720	K01184	polygalacturonase	EC:3.2.1.15	thj00040	Pentose and glucuronate interconversions	Metabolism	Carbohydrate metabolism
TRINITY_DN27075_c2_g1	thj:104818029	29.7	5.4e-23	-	probable polygalacturonase At3g15720	K01184	polygalacturonase	EC:3.2.1.15	thj00500	Starch and sucrose metabolism	Metabolism	Carbohydrate metabolism
TRINITY_DN27076_c0_g3	brp:103875261	41	1.7e-18	-	serine/threonine-protein kinase At3g07070	K13430	serine/threonine-protein kinase PBS1	EC:2.7.11.1	brp04626	Plant-pathogen interaction	Organismal Systems	Environmental adaptation
TRINITY_DN27076_c0_g4	aly:ARALYDRAFT_668785	39.2	1.4e-52	-	hypothetical protein	K13436	pto-interacting protein 1	EC:2.7.11.1	aly04626	Plant-pathogen interaction	Organismal Systems	Environmental adaptation
TRINITY_DN27077_c0_g1	fve:101314765	88.6	0	-	pyrophosphate-energized vacuolar membrane proton pump 1-like	K01507	inorganic pyrophosphatase	EC:3.6.1.1	fve00190	Oxidative phosphorylation	Metabolism	Energy metabolism
TRINITY_DN27081_c0_g1	fve:101313066	95.4	1.2e-63	-	serine/arginine-rich splicing factor SR34A	K12890	splicing factor, arginine/serine-rich 1/9	-	fve03040	Spliceosome	Genetic Information Processing	Transcription
TRINITY_DN27085_c0_g1	fve:101290764	74.2	8.7e-101	-	(-)-germacrene D synthase-like	K15803	(-)-germacrene D synthase	EC:4.2.3.22 4.2.3.75	fve00909	Sesquiterpenoid and triterpenoid biosynthesis	Metabolism	Metabolism of terpenoids and polyketides
TRINITY_DN27085_c0_g2	fve:101302497	63.5	1.8e-143	-	(-)-germacrene D synthase-like	K15803	(-)-germacrene D synthase	EC:4.2.3.22 4.2.3.75	fve00909	Sesquiterpenoid and triterpenoid biosynthesis	Metabolism	Metabolism of terpenoids and polyketides
TRINITY_DN27085_c0_g3	fve:101291476	78	4.8e-196	-	(-)-germacrene D synthase-like	K15803	(-)-germacrene D synthase	EC:4.2.3.22 4.2.3.75	fve00909	Sesquiterpenoid and triterpenoid biosynthesis	Metabolism	Metabolism of terpenoids and polyketides
TRINITY_DN27085_c0_g4	vvi:100232954	70.5	2.6e-28	-	(-)-germacrene D synthase	K15803	(-)-germacrene D synthase	EC:4.2.3.22 4.2.3.75	vvi00909	Sesquiterpenoid and triterpenoid biosynthesis	Metabolism	Metabolism of terpenoids and polyketides
TRINITY_DN27085_c0_g5	fve:101311088	62.5	7e-59	-	(-)-germacrene D synthase-like	K15803	(-)-germacrene D synthase	EC:4.2.3.22 4.2.3.75	fve00909	Sesquiterpenoid and triterpenoid biosynthesis	Metabolism	Metabolism of terpenoids and polyketides
TRINITY_DN27085_c0_g6	vvi:100232955	50.7	9.1e-35	VALCS	(+)-valencene synthase	K14181	valencene/7-epi-alpha-selinene synthase	EC:4.2.3.73 4.2.3.86	vvi00909	Sesquiterpenoid and triterpenoid biosynthesis	Metabolism	Metabolism of terpenoids and polyketides
TRINITY_DN27085_c0_g7	fve:101302497	88.2	3e-283	-	(-)-germacrene D synthase-like	K15803	(-)-germacrene D synthase	EC:4.2.3.22 4.2.3.75	fve00909	Sesquiterpenoid and triterpenoid biosynthesis	Metabolism	Metabolism of terpenoids and polyketides
TRINITY_DN27086_c0_g10	thj:104825665	92.5	3.6e-31	-	uncharacterized LOC104825665	K00737	beta-1,4-mannosyl-glycoprotein beta-1,4-N-acetylglucosaminyltransferase	EC:2.4.1.144	thj00510	N-Glycan biosynthesis	Metabolism	Glycan biosynthesis and metabolism
TRINITY_DN27086_c0_g12	thj:104799770	48.9	7.2e-27	-	uncharacterized LOC104799770	K13379	reversibly glycosylated polypeptide / UDP-arabinopyranose mutase	EC:2.4.1.- 5.4.99.30	thj00520	Amino sugar and nucleotide sugar metabolism	Metabolism	Carbohydrate metabolism
TRINITY_DN27086_c0_g3	nnu:104591508	88.3	8.1e-35	-	uncharacterized LOC104591508	K00737	beta-1,4-mannosyl-glycoprotein beta-1,4-N-acetylglucosaminyltransferase	EC:2.4.1.144	nnu00510	N-Glycan biosynthesis	Metabolism	Glycan biosynthesis and metabolism
TRINITY_DN27086_c0_g7	fve:101308596	97.7	1.6e-231	-	uncharacterized LOC101308596	K00737	beta-1,4-mannosyl-glycoprotein beta-1,4-N-acetylglucosaminyltransferase	EC:2.4.1.144	fve00510	N-Glycan biosynthesis	Metabolism	Glycan biosynthesis and metabolism
TRINITY_DN27086_c1_g1	mdm:103446271	39.1	1.7e-24	-	uncharacterized LOC103446271	K13506	glycerol-3-phosphate O-acyltransferase 3/4	EC:2.3.1.15	mdm00561	Glycerolipid metabolism	Metabolism	Lipid metabolism
TRINITY_DN27086_c1_g1	mdm:103446271	39.1	1.7e-24	-	uncharacterized LOC103446271	K13506	glycerol-3-phosphate O-acyltransferase 3/4	EC:2.3.1.15	mdm00564	Glycerophospholipid metabolism	Metabolism	Lipid metabolism
TRINITY_DN27087_c0_g3	fve:101305363	97.1	8.1e-94	-	allene oxide cyclase 3	K10525	allene oxide cyclase	EC:5.3.99.6	fve00592	alpha-Linolenic acid metabolism	Metabolism	Lipid metabolism
TRINITY_DN27087_c0_g5	ath:AT4G22753	44.7	2.2e-62	SMO1-3	sterol 4-alpha methyl oxidase 1-3	K14423	4,4-dimethyl-9beta,19-cyclopropylsterol-4alpha-methyl oxidase	EC:1.14.13.72	ath00100	Steroid biosynthesis	Metabolism	Lipid metabolism
TRINITY_DN27087_c0_g6	ath:AT4G22753	54.3	1.8e-31	SMO1-3	sterol 4-alpha methyl oxidase 1-3	K14423	4,4-dimethyl-9beta,19-cyclopropylsterol-4alpha-methyl oxidase	EC:1.14.13.72	ath00100	Steroid biosynthesis	Metabolism	Lipid metabolism
TRINITY_DN27088_c0_g1	bvg:104895495	33.4	8.1e-48	-	systemin receptor SR160	K13415	protein brassinosteroid insensitive 1	EC:2.7.10.1 2.7.11.1	bvg04075	Plant hormone signal transduction	Environmental Information Processing	Signal transduction
TRINITY_DN27089_c0_g5	pmum:103344474	41.7	9.7e-06	-	uncharacterized LOC103344474	K02883	large subunit ribosomal protein L18e	-	pmum03010	Ribosome	Genetic Information Processing	Translation
TRINITY_DN27090_c0_g1	mdm:103406190	67.1	2.5e-53	-	uncharacterized LOC103406190	K02993	small subunit ribosomal protein S7e	-	mdm03010	Ribosome	Genetic Information Processing	Translation
TRINITY_DN27090_c0_g2	mdm:103436590	78.8	1.2e-08	-	uncharacterized LOC103436590	K01431	beta-ureidopropionase	EC:3.5.1.6	mdm00240	Pyrimidine metabolism	Metabolism	Nucleotide metabolism
TRINITY_DN27090_c0_g2	mdm:103436590	78.8	1.2e-08	-	uncharacterized LOC103436590	K01431	beta-ureidopropionase	EC:3.5.1.6	mdm00410	beta-Alanine metabolism	Metabolism	Metabolism of other amino acids
TRINITY_DN27090_c0_g2	mdm:103436590	78.8	1.2e-08	-	uncharacterized LOC103436590	K01431	beta-ureidopropionase	EC:3.5.1.6	mdm00770	Pantothenate and CoA biosynthesis	Metabolism	Metabolism of cofactors and vitamins
TRINITY_DN27092_c1_g1	mtr:MTR_3g073560	53.8	1.1e-12	-	transcription factor TGA7	K14431	transcription factor TGA	-	mtr04075	Plant hormone signal transduction	Environmental Information Processing	Signal transduction
TRINITY_DN27093_c0_g1	pda:103718718	69	4.4e-43	-	F-box protein SKP2A-like	K03875	F-box and leucine-rich repeat protein 1 (S-phase kinase-associated protein 2)	-	pda04120	Ubiquitin mediated proteolysis	Genetic Information Processing	Folding, sorting and degradation
TRINITY_DN27093_c0_g4	ppp:PHYPADRAFT_164647	26.3	1e-25	-	hypothetical protein	K13422	transcription factor MYC2	-	ppp04075	Plant hormone signal transduction	Environmental Information Processing	Signal transduction
TRINITY_DN27094_c0_g3	bna:106394545	36.3	8.3e-18	-	cyclin-D3-2-like	K14505	cyclin D3, plant	-	bna04075	Plant hormone signal transduction	Environmental Information Processing	Signal transduction
TRINITY_DN27095_c0_g1	aly:ARALYDRAFT_340891	39.1	6.7e-16	-	hypothetical protein	K00770	1,4-beta-D-xylan synthase	EC:2.4.2.24	aly00500	Starch and sucrose metabolism	Metabolism	Carbohydrate metabolism
TRINITY_DN27095_c0_g1	aly:ARALYDRAFT_340891	39.1	6.7e-16	-	hypothetical protein	K00770	1,4-beta-D-xylan synthase	EC:2.4.2.24	aly00520	Amino sugar and nucleotide sugar metabolism	Metabolism	Carbohydrate metabolism
TRINITY_DN27097_c1_g2	fve:101307506	93.1	2e-100	-	ferredoxin	K02639	ferredoxin	-	fve00195	Photosynthesis	Metabolism	Energy metabolism
TRINITY_DN27099_c2_g1	nnu:104600899	78.5	3.5e-24	-	ribosomal RNA small subunit methyltransferase nep-1	K14568	rRNA small subunit pseudouridine methyltransferase Nep1	EC:2.1.1.260	nnu03008	Ribosome biogenesis in eukaryotes	Genetic Information Processing	Translation
TRINITY_DN27099_c2_g4	fve:101302441	81.1	5.1e-266	-	monofunctional riboflavin biosynthesis protein RIBA 3	K14652	3,4-dihydroxy 2-butanone 4-phosphate synthase / GTP cyclohydrolase II	EC:4.1.99.12 3.5.4.25	fve00740	Riboflavin metabolism	Metabolism	Metabolism of cofactors and vitamins
TRINITY_DN27099_c2_g5	vvi:100260745	76.8	1.5e-35	-	ribosomal RNA small subunit methyltransferase nep-1	K14568	rRNA small subunit pseudouridine methyltransferase Nep1	EC:2.1.1.260	vvi03008	Ribosome biogenesis in eukaryotes	Genetic Information Processing	Translation
TRINITY_DN27099_c2_g9	nnu:104600899	89.7	2.5e-23	-	ribosomal RNA small subunit methyltransferase nep-1	K14568	rRNA small subunit pseudouridine methyltransferase Nep1	EC:2.1.1.260	nnu03008	Ribosome biogenesis in eukaryotes	Genetic Information Processing	Translation
TRINITY_DN2709_c0_g1	fve:101310767	96.3	6.5e-43	-	acyl-[acyl-carrier-protein] desaturase 6	K03921	acyl-[acyl-carrier-protein] desaturase	EC:1.14.19.2 1.14.19.11 1.14.19.26	fve01212	Fatty acid metabolism	Metabolism	Overview
TRINITY_DN2709_c0_g1	fve:101310767	96.3	6.5e-43	-	acyl-[acyl-carrier-protein] desaturase 6	K03921	acyl-[acyl-carrier-protein] desaturase	EC:1.14.19.2 1.14.19.11 1.14.19.26	fve00061	Fatty acid biosynthesis	Metabolism	Lipid metabolism
TRINITY_DN2709_c0_g1	fve:101310767	96.3	6.5e-43	-	acyl-[acyl-carrier-protein] desaturase 6	K03921	acyl-[acyl-carrier-protein] desaturase	EC:1.14.19.2 1.14.19.11 1.14.19.26	fve01040	Biosynthesis of unsaturated fatty acids	Metabolism	Lipid metabolism
TRINITY_DN27101_c1_g1	fve:101310732	95	1.9e-123	-	GTP-binding nuclear protein Ran-3-like	K07936	GTP-binding nuclear protein Ran	-	fve03013	RNA transport	Genetic Information Processing	Translation
TRINITY_DN27101_c1_g1	fve:101310732	95	1.9e-123	-	GTP-binding nuclear protein Ran-3-like	K07936	GTP-binding nuclear protein Ran	-	fve03008	Ribosome biogenesis in eukaryotes	Genetic Information Processing	Translation
TRINITY_DN27101_c1_g3	pper:PRUPE_ppa008371mg	99.4	4.6e-104	-	hypothetical protein	K07936	GTP-binding nuclear protein Ran	-	pper03013	RNA transport	Genetic Information Processing	Translation
TRINITY_DN27101_c1_g3	pper:PRUPE_ppa008371mg	99.4	4.6e-104	-	hypothetical protein	K07936	GTP-binding nuclear protein Ran	-	pper03008	Ribosome biogenesis in eukaryotes	Genetic Information Processing	Translation
TRINITY_DN27101_c1_g4	fve:101310732	87	1e-55	-	GTP-binding nuclear protein Ran-3-like	K07936	GTP-binding nuclear protein Ran	-	fve03013	RNA transport	Genetic Information Processing	Translation
TRINITY_DN27101_c1_g4	fve:101310732	87	1e-55	-	GTP-binding nuclear protein Ran-3-like	K07936	GTP-binding nuclear protein Ran	-	fve03008	Ribosome biogenesis in eukaryotes	Genetic Information Processing	Translation
TRINITY_DN27101_c1_g5	pper:PRUPE_ppa010188mg	100	2.9e-47	-	hypothetical protein	K07936	GTP-binding nuclear protein Ran	-	pper03013	RNA transport	Genetic Information Processing	Translation
TRINITY_DN27101_c1_g5	pper:PRUPE_ppa010188mg	100	2.9e-47	-	hypothetical protein	K07936	GTP-binding nuclear protein Ran	-	pper03008	Ribosome biogenesis in eukaryotes	Genetic Information Processing	Translation
TRINITY_DN27101_c1_g6	mdm:103431343	91.9	1.5e-118	-	GTP-binding nuclear protein Ran1-like	K07936	GTP-binding nuclear protein Ran	-	mdm03013	RNA transport	Genetic Information Processing	Translation
TRINITY_DN27101_c1_g6	mdm:103431343	91.9	1.5e-118	-	GTP-binding nuclear protein Ran1-like	K07936	GTP-binding nuclear protein Ran	-	mdm03008	Ribosome biogenesis in eukaryotes	Genetic Information Processing	Translation
TRINITY_DN27102_c1_g1	nnu:104600104	95	4.8e-82	-	phosphoglycerate mutase-like	K01834	2,3-bisphosphoglycerate-dependent phosphoglycerate mutase	EC:5.4.2.11	nnu01200	Carbon metabolism	Metabolism	Overview
TRINITY_DN27102_c1_g1	nnu:104600104	95	4.8e-82	-	phosphoglycerate mutase-like	K01834	2,3-bisphosphoglycerate-dependent phosphoglycerate mutase	EC:5.4.2.11	nnu01230	Biosynthesis of amino acids	Metabolism	Overview
TRINITY_DN27102_c1_g1	nnu:104600104	95	4.8e-82	-	phosphoglycerate mutase-like	K01834	2,3-bisphosphoglycerate-dependent phosphoglycerate mutase	EC:5.4.2.11	nnu00010	Glycolysis / Gluconeogenesis	Metabolism	Carbohydrate metabolism
TRINITY_DN27102_c1_g1	nnu:104600104	95	4.8e-82	-	phosphoglycerate mutase-like	K01834	2,3-bisphosphoglycerate-dependent phosphoglycerate mutase	EC:5.4.2.11	nnu00260	Glycine, serine and threonine metabolism	Metabolism	Amino acid metabolism
TRINITY_DN27102_c1_g2	fve:101309348	95.9	2.2e-187	-	phosphoglycerate mutase	K01834	2,3-bisphosphoglycerate-dependent phosphoglycerate mutase	EC:5.4.2.11	fve01200	Carbon metabolism	Metabolism	Overview
TRINITY_DN27102_c1_g2	fve:101309348	95.9	2.2e-187	-	phosphoglycerate mutase	K01834	2,3-bisphosphoglycerate-dependent phosphoglycerate mutase	EC:5.4.2.11	fve01230	Biosynthesis of amino acids	Metabolism	Overview
TRINITY_DN27102_c1_g2	fve:101309348	95.9	2.2e-187	-	phosphoglycerate mutase	K01834	2,3-bisphosphoglycerate-dependent phosphoglycerate mutase	EC:5.4.2.11	fve00010	Glycolysis / Gluconeogenesis	Metabolism	Carbohydrate metabolism
TRINITY_DN27102_c1_g2	fve:101309348	95.9	2.2e-187	-	phosphoglycerate mutase	K01834	2,3-bisphosphoglycerate-dependent phosphoglycerate mutase	EC:5.4.2.11	fve00260	Glycine, serine and threonine metabolism	Metabolism	Amino acid metabolism
TRINITY_DN27102_c1_g4	fve:101306186	94.8	6.8e-252	-	probable pectinesterase/pectinesterase inhibitor 25	K01051	pectinesterase	EC:3.1.1.11	fve00040	Pentose and glucuronate interconversions	Metabolism	Carbohydrate metabolism
TRINITY_DN27102_c1_g4	fve:101306186	94.8	6.8e-252	-	probable pectinesterase/pectinesterase inhibitor 25	K01051	pectinesterase	EC:3.1.1.11	fve00500	Starch and sucrose metabolism	Metabolism	Carbohydrate metabolism
TRINITY_DN27102_c1_g5	nnu:104600104	83.1	1.3e-159	-	phosphoglycerate mutase-like	K01834	2,3-bisphosphoglycerate-dependent phosphoglycerate mutase	EC:5.4.2.11	nnu01200	Carbon metabolism	Metabolism	Overview
TRINITY_DN27102_c1_g5	nnu:104600104	83.1	1.3e-159	-	phosphoglycerate mutase-like	K01834	2,3-bisphosphoglycerate-dependent phosphoglycerate mutase	EC:5.4.2.11	nnu01230	Biosynthesis of amino acids	Metabolism	Overview
TRINITY_DN27102_c1_g5	nnu:104600104	83.1	1.3e-159	-	phosphoglycerate mutase-like	K01834	2,3-bisphosphoglycerate-dependent phosphoglycerate mutase	EC:5.4.2.11	nnu00010	Glycolysis / Gluconeogenesis	Metabolism	Carbohydrate metabolism
TRINITY_DN27102_c1_g5	nnu:104600104	83.1	1.3e-159	-	phosphoglycerate mutase-like	K01834	2,3-bisphosphoglycerate-dependent phosphoglycerate mutase	EC:5.4.2.11	nnu00260	Glycine, serine and threonine metabolism	Metabolism	Amino acid metabolism
TRINITY_DN27102_c1_g6	fve:101295034	82.1	1.1e-06	-	probable isoleucine--tRNA ligase	K01870	isoleucyl-tRNA synthetase	EC:6.1.1.5	fve00970	Aminoacyl-tRNA biosynthesis	Genetic Information Processing	Translation
TRINITY_DN27102_c1_g9	fve:101307636	94.4	3.5e-52	-	phosphoglycerate mutase-like	K01834	2,3-bisphosphoglycerate-dependent phosphoglycerate mutase	EC:5.4.2.11	fve01200	Carbon metabolism	Metabolism	Overview
TRINITY_DN27102_c1_g9	fve:101307636	94.4	3.5e-52	-	phosphoglycerate mutase-like	K01834	2,3-bisphosphoglycerate-dependent phosphoglycerate mutase	EC:5.4.2.11	fve01230	Biosynthesis of amino acids	Metabolism	Overview
TRINITY_DN27102_c1_g9	fve:101307636	94.4	3.5e-52	-	phosphoglycerate mutase-like	K01834	2,3-bisphosphoglycerate-dependent phosphoglycerate mutase	EC:5.4.2.11	fve00010	Glycolysis / Gluconeogenesis	Metabolism	Carbohydrate metabolism
TRINITY_DN27102_c1_g9	fve:101307636	94.4	3.5e-52	-	phosphoglycerate mutase-like	K01834	2,3-bisphosphoglycerate-dependent phosphoglycerate mutase	EC:5.4.2.11	fve00260	Glycine, serine and threonine metabolism	Metabolism	Amino acid metabolism
TRINITY_DN27103_c0_g1	atr:18436398	90	7.9e-96	-	60S ribosomal protein L9	K02940	large subunit ribosomal protein L9e	-	atr03010	Ribosome	Genetic Information Processing	Translation
TRINITY_DN27105_c0_g2	sita:101769255	90.9	4.3e-84	-	peroxidase 64-like	K00430	peroxidase	EC:1.11.1.7	sita00940	Phenylpropanoid biosynthesis	Metabolism	Biosynthesis of other secondary metabolites
TRINITY_DN27105_c0_g5	mus:103995567	43.1	1.7e-06	-	dnaJ homolog subfamily B member 11-like	K09517	DnaJ homolog subfamily B member 11	-	mus04141	Protein processing in endoplasmic reticulum	Genetic Information Processing	Folding, sorting and degradation
TRINITY_DN27105_c0_g9	mis:MICPUN_74177	43.7	2.3e-07	-	hypothetical protein	K09518	DnaJ homolog subfamily B member 12	-	mis04141	Protein processing in endoplasmic reticulum	Genetic Information Processing	Folding, sorting and degradation
TRINITY_DN27106_c0_g1	pda:103716930	90	1.1e-30	-	protein transport protein Sec31A-like	K14005	protein transport protein SEC31	-	pda04141	Protein processing in endoplasmic reticulum	Genetic Information Processing	Folding, sorting and degradation
TRINITY_DN27107_c0_g1	atr:18421530	66.3	5.4e-31	-	uncharacterized protein At3g03773	K15730	cytosolic prostaglandin-E synthase	EC:5.3.99.3	atr00590	Arachidonic acid metabolism	Metabolism	Lipid metabolism
TRINITY_DN27107_c1_g1	fve:101298627	86.4	1.6e-173	-	1-aminocyclopropane-1-carboxylate oxidase	K05933	aminocyclopropanecarboxylate oxidase	EC:1.14.17.4	fve00270	Cysteine and methionine metabolism	Metabolism	Amino acid metabolism
TRINITY_DN27107_c1_g2	pvu:PHAVU_008G214200g	100	5.3e-39	-	hypothetical protein	K05933	aminocyclopropanecarboxylate oxidase	EC:1.14.17.4	pvu00270	Cysteine and methionine metabolism	Metabolism	Amino acid metabolism
TRINITY_DN27107_c1_g3	pvu:PHAVU_008G214200g	100	5.4e-47	-	hypothetical protein	K05933	aminocyclopropanecarboxylate oxidase	EC:1.14.17.4	pvu00270	Cysteine and methionine metabolism	Metabolism	Amino acid metabolism
TRINITY_DN27109_c0_g1	fve:101293139	95.4	1.3e-214	-	sedoheptulose-1	K01100	sedoheptulose-bisphosphatase	EC:3.1.3.37	fve01200	Carbon metabolism	Metabolism	Overview
TRINITY_DN27109_c0_g1	fve:101293139	95.4	1.3e-214	-	sedoheptulose-1	K01100	sedoheptulose-bisphosphatase	EC:3.1.3.37	fve00710	Carbon fixation in photosynthetic organisms	Metabolism	Energy metabolism
TRINITY_DN27109_c0_g3	pvu:PHAVU_001G240200g	100	3.1e-217	-	hypothetical protein	K01100	sedoheptulose-bisphosphatase	EC:3.1.3.37	pvu01200	Carbon metabolism	Metabolism	Overview
TRINITY_DN27109_c0_g3	pvu:PHAVU_001G240200g	100	3.1e-217	-	hypothetical protein	K01100	sedoheptulose-bisphosphatase	EC:3.1.3.37	pvu00710	Carbon fixation in photosynthetic organisms	Metabolism	Energy metabolism
TRINITY_DN27111_c1_g1	pmum:103333626	30.4	3.5e-31	-	cyclic nucleotide-gated ion channel 1-like	K05391	cyclic nucleotide gated channel, other eukaryote	-	pmum04626	Plant-pathogen interaction	Organismal Systems	Environmental adaptation
TRINITY_DN27111_c1_g10	bna:106384454	28.4	6.7e-32	-	uncharacterized LOC106384454	K00872	homoserine kinase	EC:2.7.1.39	bna01230	Biosynthesis of amino acids	Metabolism	Overview
TRINITY_DN27111_c1_g10	bna:106384454	28.4	6.7e-32	-	uncharacterized LOC106384454	K00872	homoserine kinase	EC:2.7.1.39	bna00260	Glycine, serine and threonine metabolism	Metabolism	Amino acid metabolism
TRINITY_DN27111_c1_g3	fve:101315072	93.1	1.3e-13	-	probable 26S proteasome complex subunit sem1-2	K10881	26 proteasome complex subunit DSS1	-	fve03050	Proteasome	Genetic Information Processing	Folding, sorting and degradation
TRINITY_DN27111_c1_g3	fve:101315072	93.1	1.3e-13	-	probable 26S proteasome complex subunit sem1-2	K10881	26 proteasome complex subunit DSS1	-	fve03440	Homologous recombination	Genetic Information Processing	Replication and repair
TRINITY_DN27111_c1_g5	bna:106384454	28.8	7.1e-32	-	uncharacterized LOC106384454	K00872	homoserine kinase	EC:2.7.1.39	bna01230	Biosynthesis of amino acids	Metabolism	Overview
TRINITY_DN27111_c1_g5	bna:106384454	28.8	7.1e-32	-	uncharacterized LOC106384454	K00872	homoserine kinase	EC:2.7.1.39	bna00260	Glycine, serine and threonine metabolism	Metabolism	Amino acid metabolism
TRINITY_DN27113_c1_g2	fve:101292152	88	0	-	ETHYLENE INSENSITIVE 3-like 1 protein	K14514	ethylene-insensitive protein 3	-	fve04075	Plant hormone signal transduction	Environmental Information Processing	Signal transduction
TRINITY_DN27113_c1_g6	bvg:104905769	29.5	1.3e-29	-	BRASSINOSTEROID INSENSITIVE 1-associated receptor kinase 1-like	K13416	brassinosteroid insensitive 1-associated receptor kinase 1	EC:2.7.10.1 2.7.11.1	bvg04075	Plant hormone signal transduction	Environmental Information Processing	Signal transduction
TRINITY_DN27113_c1_g6	bvg:104905769	29.5	1.3e-29	-	BRASSINOSTEROID INSENSITIVE 1-associated receptor kinase 1-like	K13416	brassinosteroid insensitive 1-associated receptor kinase 1	EC:2.7.10.1 2.7.11.1	bvg04626	Plant-pathogen interaction	Organismal Systems	Environmental adaptation
TRINITY_DN27114_c1_g1	gmx:100794508	56.7	3.4e-24	-	G-type lectin S-receptor-like serine/threonine-protein kinase CES101	K01183	chitinase	EC:3.2.1.14	gmx00520	Amino sugar and nucleotide sugar metabolism	Metabolism	Carbohydrate metabolism
TRINITY_DN27114_c1_g2	gra:105765943	43	3.2e-36	-	cysteine-rich receptor-like protein kinase 19	K01183	chitinase	EC:3.2.1.14	gra00520	Amino sugar and nucleotide sugar metabolism	Metabolism	Carbohydrate metabolism
TRINITY_DN27114_c1_g4	gra:105783845	61.5	1.6e-21	-	wall-associated receptor kinase-like 10	-	-	-	gra00520	Amino sugar and nucleotide sugar metabolism	Metabolism	Carbohydrate metabolism
TRINITY_DN27115_c0_g1	sly:101251978	81.6	1e-29	-	uncharacterized LOC101251978	K03655	ATP-dependent DNA helicase RecG	EC:3.6.4.12	sly03440	Homologous recombination	Genetic Information Processing	Replication and repair
TRINITY_DN27115_c1_g1	fve:101291046	89.9	0	-	uncharacterized LOC101291046	K03655	ATP-dependent DNA helicase RecG	EC:3.6.4.12	fve03440	Homologous recombination	Genetic Information Processing	Replication and repair
TRINITY_DN27116_c0_g1	fve:101314495	96.8	2.7e-159	-	NADH--cytochrome b5 reductase 1-like	K00326	cytochrome-b5 reductase	EC:1.6.2.2	fve00520	Amino sugar and nucleotide sugar metabolism	Metabolism	Carbohydrate metabolism
TRINITY_DN27117_c0_g1	fve:101293186	98.2	4.4e-58	-	homocysteine S-methyltransferase 3	K00547	homocysteine S-methyltransferase	EC:2.1.1.10	fve00270	Cysteine and methionine metabolism	Metabolism	Amino acid metabolism
TRINITY_DN27117_c1_g1	fve:101303869	64.6	9.1e-45	-	homocysteine S-methyltransferase 2	K00547	homocysteine S-methyltransferase	EC:2.1.1.10	fve00270	Cysteine and methionine metabolism	Metabolism	Amino acid metabolism
TRINITY_DN27117_c1_g13	zma:103637544	46.7	3.8e-23	-	ABC transporter B family member 21-like	K05658	ATP-binding cassette, subfamily B (MDR/TAP), member 1	EC:3.6.3.44	zma02010	ABC transporters	Environmental Information Processing	Membrane transport
TRINITY_DN27117_c1_g4	gmx:102659388	39.1	7.3e-08	-	leucine aminopeptidase 3	K01255	leucyl aminopeptidase	EC:3.4.11.1	gmx00480	Glutathione metabolism	Metabolism	Metabolism of other amino acids
TRINITY_DN27117_c1_g5	fve:101314926	87.2	9.1e-16	-	mRNA cap guanine-N7 methyltransferase 1-like	K00565	mRNA (guanine-N7-)-methyltransferase	EC:2.1.1.56	fve03015	mRNA surveillance pathway	Genetic Information Processing	Translation
TRINITY_DN27117_c1_g6	fve:101303869	88.4	7.7e-27	-	homocysteine S-methyltransferase 2	K00547	homocysteine S-methyltransferase	EC:2.1.1.10	fve00270	Cysteine and methionine metabolism	Metabolism	Amino acid metabolism
TRINITY_DN27117_c1_g7	gra:105788143	47.6	3.1e-16	-	glycine-rich RNA-binding protein 2	K12741	heterogeneous nuclear ribonucleoprotein A1/A3	-	gra03040	Spliceosome	Genetic Information Processing	Transcription
TRINITY_DN27117_c1_g9	fve:101303869	89.1	6.1e-122	-	homocysteine S-methyltransferase 2	K00547	homocysteine S-methyltransferase	EC:2.1.1.10	fve00270	Cysteine and methionine metabolism	Metabolism	Amino acid metabolism
TRINITY_DN27118_c0_g1	csv:101216698	26	3.3e-07	-	WD repeat-containing protein 36	K14554	U3 small nucleolar RNA-associated protein 21	-	csv03008	Ribosome biogenesis in eukaryotes	Genetic Information Processing	Translation
TRINITY_DN27119_c0_g1	pper:PRUPE_ppa002748mg	84.8	0	-	hypothetical protein	K11808	phosphoribosylaminoimidazole carboxylase	EC:4.1.1.21	pper00230	Purine metabolism	Metabolism	Nucleotide metabolism
TRINITY_DN27121_c0_g1	sita:101776988	47.8	6.5e-08	-	pectinesterase QRT1	K01051	pectinesterase	EC:3.1.1.11	sita00040	Pentose and glucuronate interconversions	Metabolism	Carbohydrate metabolism
TRINITY_DN27121_c0_g1	sita:101776988	47.8	6.5e-08	-	pectinesterase QRT1	K01051	pectinesterase	EC:3.1.1.11	sita00500	Starch and sucrose metabolism	Metabolism	Carbohydrate metabolism
TRINITY_DN27124_c0_g1	fve:101312920	51.3	3.1e-19	-	histidine-containing phosphotransfer protein 1-like	K14490	histidine-containing phosphotransfer peotein	-	fve04075	Plant hormone signal transduction	Environmental Information Processing	Signal transduction
TRINITY_DN27124_c0_g2	tcc:TCM_020258	28.9	1.6e-16	-	Phenylalanyl-tRNA synthetase class IIc family protein	K01889	phenylalanyl-tRNA synthetase alpha chain	EC:6.1.1.20	tcc00970	Aminoacyl-tRNA biosynthesis	Genetic Information Processing	Translation
TRINITY_DN27124_c0_g3	aly:ARALYDRAFT_339268	23.9	2.7e-06	-	hypothetical protein	K12844	U4/U6 small nuclear ribonucleoprotein PRP31	-	aly03040	Spliceosome	Genetic Information Processing	Transcription
TRINITY_DN27124_c0_g4	tcc:TCM_020258	27.8	3.8e-07	-	Phenylalanyl-tRNA synthetase class IIc family protein	K01889	phenylalanyl-tRNA synthetase alpha chain	EC:6.1.1.20	tcc00970	Aminoacyl-tRNA biosynthesis	Genetic Information Processing	Translation
TRINITY_DN27124_c0_g5	tcc:TCM_020258	30.5	5.8e-08	-	Phenylalanyl-tRNA synthetase class IIc family protein	K01889	phenylalanyl-tRNA synthetase alpha chain	EC:6.1.1.20	tcc00970	Aminoacyl-tRNA biosynthesis	Genetic Information Processing	Translation
TRINITY_DN27125_c0_g1	mdm:103403202	49.8	6.2e-89	-	serine/threonine-protein kinase PBS1-like	K13430	serine/threonine-protein kinase PBS1	EC:2.7.11.1	mdm04626	Plant-pathogen interaction	Organismal Systems	Environmental adaptation
TRINITY_DN27126_c1_g1	fve:101301095	98.5	4.8e-185	-	malate dehydrogenase	K00025	malate dehydrogenase	EC:1.1.1.37	fve01200	Carbon metabolism	Metabolism	Overview
TRINITY_DN27126_c1_g1	fve:101301095	98.5	4.8e-185	-	malate dehydrogenase	K00025	malate dehydrogenase	EC:1.1.1.37	fve00020	Citrate cycle (TCA cycle)	Metabolism	Carbohydrate metabolism
TRINITY_DN27126_c1_g1	fve:101301095	98.5	4.8e-185	-	malate dehydrogenase	K00025	malate dehydrogenase	EC:1.1.1.37	fve00620	Pyruvate metabolism	Metabolism	Carbohydrate metabolism
TRINITY_DN27126_c1_g1	fve:101301095	98.5	4.8e-185	-	malate dehydrogenase	K00025	malate dehydrogenase	EC:1.1.1.37	fve00630	Glyoxylate and dicarboxylate metabolism	Metabolism	Carbohydrate metabolism
TRINITY_DN27126_c1_g1	fve:101301095	98.5	4.8e-185	-	malate dehydrogenase	K00025	malate dehydrogenase	EC:1.1.1.37	fve00710	Carbon fixation in photosynthetic organisms	Metabolism	Energy metabolism
TRINITY_DN27126_c1_g1	fve:101301095	98.5	4.8e-185	-	malate dehydrogenase	K00025	malate dehydrogenase	EC:1.1.1.37	fve00270	Cysteine and methionine metabolism	Metabolism	Amino acid metabolism
TRINITY_DN27126_c1_g7	pvu:PHAVU_007G273500g	99	3.9e-47	-	hypothetical protein	K00025	malate dehydrogenase	EC:1.1.1.37	pvu01200	Carbon metabolism	Metabolism	Overview
TRINITY_DN27126_c1_g7	pvu:PHAVU_007G273500g	99	3.9e-47	-	hypothetical protein	K00025	malate dehydrogenase	EC:1.1.1.37	pvu00020	Citrate cycle (TCA cycle)	Metabolism	Carbohydrate metabolism
TRINITY_DN27126_c1_g7	pvu:PHAVU_007G273500g	99	3.9e-47	-	hypothetical protein	K00025	malate dehydrogenase	EC:1.1.1.37	pvu00620	Pyruvate metabolism	Metabolism	Carbohydrate metabolism
TRINITY_DN27126_c1_g7	pvu:PHAVU_007G273500g	99	3.9e-47	-	hypothetical protein	K00025	malate dehydrogenase	EC:1.1.1.37	pvu00630	Glyoxylate and dicarboxylate metabolism	Metabolism	Carbohydrate metabolism
TRINITY_DN27126_c1_g7	pvu:PHAVU_007G273500g	99	3.9e-47	-	hypothetical protein	K00025	malate dehydrogenase	EC:1.1.1.37	pvu00710	Carbon fixation in photosynthetic organisms	Metabolism	Energy metabolism
TRINITY_DN27126_c1_g7	pvu:PHAVU_007G273500g	99	3.9e-47	-	hypothetical protein	K00025	malate dehydrogenase	EC:1.1.1.37	pvu00270	Cysteine and methionine metabolism	Metabolism	Amino acid metabolism
TRINITY_DN27127_c0_g1	fve:101290932	69.1	1.2e-13	-	disease resistance protein RPM1-like	K13457	disease resistance protein RPM1	-	fve04626	Plant-pathogen interaction	Organismal Systems	Environmental adaptation
TRINITY_DN27127_c1_g1	fve:101290932	65.9	3e-38	-	disease resistance protein RPM1-like	K13457	disease resistance protein RPM1	-	fve04626	Plant-pathogen interaction	Organismal Systems	Environmental adaptation
TRINITY_DN27127_c1_g2	fve:101290932	68.2	1.8e-24	-	disease resistance protein RPM1-like	K13457	disease resistance protein RPM1	-	fve04626	Plant-pathogen interaction	Organismal Systems	Environmental adaptation
TRINITY_DN27128_c1_g5	gra:105780378	77.3	3.2e-275	-	ABC transporter G family member 5	K05681	ATP-binding cassette, subfamily G (WHITE), member 2	-	gra02010	ABC transporters	Environmental Information Processing	Membrane transport
TRINITY_DN27129_c0_g1	brp:103845674	48	9.2e-76	-	LRR receptor-like serine/threonine-protein kinase EFR	K13428	LRR receptor-like serine/threonine-protein kinase EFR	EC:2.7.11.1	brp04626	Plant-pathogen interaction	Organismal Systems	Environmental adaptation
TRINITY_DN27131_c0_g1	gra:105761152	40.2	1.9e-11	-	transcription factor PIF3	K12126	phytochrome-interacting factor 3	-	gra04075	Plant hormone signal transduction	Environmental Information Processing	Signal transduction
TRINITY_DN27131_c0_g1	gra:105761152	40.2	1.9e-11	-	transcription factor PIF3	K12126	phytochrome-interacting factor 3	-	gra04712	Circadian rhythm - plant	Organismal Systems	Environmental adaptation
TRINITY_DN27131_c0_g3	gmx:100799994	43.1	5.8e-68	-	cinnamoyl-CoA reductase 1-like	K09753	cinnamoyl-CoA reductase	EC:1.2.1.44	gmx00940	Phenylpropanoid biosynthesis	Metabolism	Biosynthesis of other secondary metabolites
TRINITY_DN27133_c1_g5	obr:102715163	50.5	2.1e-19	-	protein BRASSINOSTEROID INSENSITIVE 1-like	K13415	protein brassinosteroid insensitive 1	EC:2.7.10.1 2.7.11.1	obr04075	Plant hormone signal transduction	Environmental Information Processing	Signal transduction
TRINITY_DN27133_c1_g7	obr:102715163	45.4	6.5e-16	-	protein BRASSINOSTEROID INSENSITIVE 1-like	K13415	protein brassinosteroid insensitive 1	EC:2.7.10.1 2.7.11.1	obr04075	Plant hormone signal transduction	Environmental Information Processing	Signal transduction
TRINITY_DN27134_c0_g1	pmum:103324996	72.8	5.4e-95	-	putative receptor-like protein kinase At3g47110	K13420	LRR receptor-like serine/threonine-protein kinase FLS2	EC:2.7.11.1	pmum04626	Plant-pathogen interaction	Organismal Systems	Environmental adaptation
TRINITY_DN27134_c0_g2	fve:101312618	80.2	6.7e-74	-	probable LRR receptor-like serine/threonine-protein kinase At3g47570	K13420	LRR receptor-like serine/threonine-protein kinase FLS2	EC:2.7.11.1	fve04626	Plant-pathogen interaction	Organismal Systems	Environmental adaptation
TRINITY_DN27134_c0_g3	pxb:103963906	75	2.4e-63	-	probable LRR receptor-like serine/threonine-protein kinase At3g47570	K13420	LRR receptor-like serine/threonine-protein kinase FLS2	EC:2.7.11.1	pxb04626	Plant-pathogen interaction	Organismal Systems	Environmental adaptation
TRINITY_DN27135_c0_g3	cre:CHLREDRAFT_134606	44.6	6.9e-12	ERJ1	ER DnaJ-like protein 1	K09517	DnaJ homolog subfamily B member 11	-	cre04141	Protein processing in endoplasmic reticulum	Genetic Information Processing	Folding, sorting and degradation
TRINITY_DN27136_c0_g1	egr:104428436	39	6.6e-65	-	uncharacterized LOC104428436	K12854	pre-mRNA-splicing helicase BRR2	EC:3.6.4.13	egr03040	Spliceosome	Genetic Information Processing	Transcription
TRINITY_DN27136_c0_g2	egr:104428436	39	2.4e-58	-	uncharacterized LOC104428436	K12854	pre-mRNA-splicing helicase BRR2	EC:3.6.4.13	egr03040	Spliceosome	Genetic Information Processing	Transcription
TRINITY_DN27137_c0_g1	fve:101302909	93.7	7.4e-141	-	acetyl-CoA acetyltransferase	K00626	acetyl-CoA C-acetyltransferase	EC:2.3.1.9	fve01200	Carbon metabolism	Metabolism	Overview
TRINITY_DN27137_c0_g1	fve:101302909	93.7	7.4e-141	-	acetyl-CoA acetyltransferase	K00626	acetyl-CoA C-acetyltransferase	EC:2.3.1.9	fve01212	Fatty acid metabolism	Metabolism	Overview
TRINITY_DN27137_c0_g1	fve:101302909	93.7	7.4e-141	-	acetyl-CoA acetyltransferase	K00626	acetyl-CoA C-acetyltransferase	EC:2.3.1.9	fve00620	Pyruvate metabolism	Metabolism	Carbohydrate metabolism
TRINITY_DN27137_c0_g1	fve:101302909	93.7	7.4e-141	-	acetyl-CoA acetyltransferase	K00626	acetyl-CoA C-acetyltransferase	EC:2.3.1.9	fve00630	Glyoxylate and dicarboxylate metabolism	Metabolism	Carbohydrate metabolism
TRINITY_DN27137_c0_g1	fve:101302909	93.7	7.4e-141	-	acetyl-CoA acetyltransferase	K00626	acetyl-CoA C-acetyltransferase	EC:2.3.1.9	fve00640	Propanoate metabolism	Metabolism	Carbohydrate metabolism
TRINITY_DN27137_c0_g1	fve:101302909	93.7	7.4e-141	-	acetyl-CoA acetyltransferase	K00626	acetyl-CoA C-acetyltransferase	EC:2.3.1.9	fve00650	Butanoate metabolism	Metabolism	Carbohydrate metabolism
TRINITY_DN27137_c0_g1	fve:101302909	93.7	7.4e-141	-	acetyl-CoA acetyltransferase	K00626	acetyl-CoA C-acetyltransferase	EC:2.3.1.9	fve00071	Fatty acid degradation	Metabolism	Lipid metabolism
TRINITY_DN27137_c0_g1	fve:101302909	93.7	7.4e-141	-	acetyl-CoA acetyltransferase	K00626	acetyl-CoA C-acetyltransferase	EC:2.3.1.9	fve00072	Synthesis and degradation of ketone bodies	Metabolism	Lipid metabolism
TRINITY_DN27137_c0_g1	fve:101302909	93.7	7.4e-141	-	acetyl-CoA acetyltransferase	K00626	acetyl-CoA C-acetyltransferase	EC:2.3.1.9	fve00280	Valine, leucine and isoleucine degradation	Metabolism	Amino acid metabolism
TRINITY_DN27137_c0_g1	fve:101302909	93.7	7.4e-141	-	acetyl-CoA acetyltransferase	K00626	acetyl-CoA C-acetyltransferase	EC:2.3.1.9	fve00310	Lysine degradation	Metabolism	Amino acid metabolism
TRINITY_DN27137_c0_g1	fve:101302909	93.7	7.4e-141	-	acetyl-CoA acetyltransferase	K00626	acetyl-CoA C-acetyltransferase	EC:2.3.1.9	fve00380	Tryptophan metabolism	Metabolism	Amino acid metabolism
TRINITY_DN27137_c0_g1	fve:101302909	93.7	7.4e-141	-	acetyl-CoA acetyltransferase	K00626	acetyl-CoA C-acetyltransferase	EC:2.3.1.9	fve00900	Terpenoid backbone biosynthesis	Metabolism	Metabolism of terpenoids and polyketides
TRINITY_DN27137_c0_g2	nnu:104605063	88.5	2.8e-207	-	acetyl-CoA acetyltransferase	K00626	acetyl-CoA C-acetyltransferase	EC:2.3.1.9	nnu01200	Carbon metabolism	Metabolism	Overview
TRINITY_DN27137_c0_g2	nnu:104605063	88.5	2.8e-207	-	acetyl-CoA acetyltransferase	K00626	acetyl-CoA C-acetyltransferase	EC:2.3.1.9	nnu01212	Fatty acid metabolism	Metabolism	Overview
TRINITY_DN27137_c0_g2	nnu:104605063	88.5	2.8e-207	-	acetyl-CoA acetyltransferase	K00626	acetyl-CoA C-acetyltransferase	EC:2.3.1.9	nnu00620	Pyruvate metabolism	Metabolism	Carbohydrate metabolism
TRINITY_DN27137_c0_g2	nnu:104605063	88.5	2.8e-207	-	acetyl-CoA acetyltransferase	K00626	acetyl-CoA C-acetyltransferase	EC:2.3.1.9	nnu00630	Glyoxylate and dicarboxylate metabolism	Metabolism	Carbohydrate metabolism
TRINITY_DN27137_c0_g2	nnu:104605063	88.5	2.8e-207	-	acetyl-CoA acetyltransferase	K00626	acetyl-CoA C-acetyltransferase	EC:2.3.1.9	nnu00640	Propanoate metabolism	Metabolism	Carbohydrate metabolism
TRINITY_DN27137_c0_g2	nnu:104605063	88.5	2.8e-207	-	acetyl-CoA acetyltransferase	K00626	acetyl-CoA C-acetyltransferase	EC:2.3.1.9	nnu00650	Butanoate metabolism	Metabolism	Carbohydrate metabolism
TRINITY_DN27137_c0_g2	nnu:104605063	88.5	2.8e-207	-	acetyl-CoA acetyltransferase	K00626	acetyl-CoA C-acetyltransferase	EC:2.3.1.9	nnu00071	Fatty acid degradation	Metabolism	Lipid metabolism
TRINITY_DN27137_c0_g2	nnu:104605063	88.5	2.8e-207	-	acetyl-CoA acetyltransferase	K00626	acetyl-CoA C-acetyltransferase	EC:2.3.1.9	nnu00072	Synthesis and degradation of ketone bodies	Metabolism	Lipid metabolism
TRINITY_DN27137_c0_g2	nnu:104605063	88.5	2.8e-207	-	acetyl-CoA acetyltransferase	K00626	acetyl-CoA C-acetyltransferase	EC:2.3.1.9	nnu00280	Valine, leucine and isoleucine degradation	Metabolism	Amino acid metabolism
TRINITY_DN27137_c0_g2	nnu:104605063	88.5	2.8e-207	-	acetyl-CoA acetyltransferase	K00626	acetyl-CoA C-acetyltransferase	EC:2.3.1.9	nnu00310	Lysine degradation	Metabolism	Amino acid metabolism
TRINITY_DN27137_c0_g2	nnu:104605063	88.5	2.8e-207	-	acetyl-CoA acetyltransferase	K00626	acetyl-CoA C-acetyltransferase	EC:2.3.1.9	nnu00380	Tryptophan metabolism	Metabolism	Amino acid metabolism
TRINITY_DN27137_c0_g2	nnu:104605063	88.5	2.8e-207	-	acetyl-CoA acetyltransferase	K00626	acetyl-CoA C-acetyltransferase	EC:2.3.1.9	nnu00900	Terpenoid backbone biosynthesis	Metabolism	Metabolism of terpenoids and polyketides
TRINITY_DN27137_c0_g3	ppp:PHYPADRAFT_214139	39.3	8.2e-88	-	hypothetical protein	K19891	glucan endo-1,3-beta-glucosidase 1/2/3	EC:3.2.1.39	ppp00500	Starch and sucrose metabolism	Metabolism	Carbohydrate metabolism
TRINITY_DN27140_c1_g7	rcu:RCOM_1078760	53.5	3.9e-87	-	receptor serine-threonine protein kinase	K13430	serine/threonine-protein kinase PBS1	EC:2.7.11.1	rcu04626	Plant-pathogen interaction	Organismal Systems	Environmental adaptation
TRINITY_DN27140_c1_g9	jcu:105644862	65.7	2.8e-06	-	serine/threonine-protein kinase PBS1	K13430	serine/threonine-protein kinase PBS1	EC:2.7.11.1	jcu04626	Plant-pathogen interaction	Organismal Systems	Environmental adaptation
TRINITY_DN27141_c0_g4	dosa:Os09t0262000-00	64.7	5e-06	Os09g0262000	Similar to Cinnamoyl CoA reductase.	K09753	cinnamoyl-CoA reductase	EC:1.2.1.44	dosa00940	Phenylpropanoid biosynthesis	Metabolism	Biosynthesis of other secondary metabolites
TRINITY_DN27142_c0_g1	fve:101302133	63.2	3.3e-58	-	probable phospholipid hydroperoxide glutathione peroxidase	K00432	glutathione peroxidase	EC:1.11.1.9	fve00590	Arachidonic acid metabolism	Metabolism	Lipid metabolism
TRINITY_DN27142_c0_g1	fve:101302133	63.2	3.3e-58	-	probable phospholipid hydroperoxide glutathione peroxidase	K00432	glutathione peroxidase	EC:1.11.1.9	fve00480	Glutathione metabolism	Metabolism	Metabolism of other amino acids
TRINITY_DN27143_c1_g1	nnu:104611594	92.9	6e-97	-	phosphoenolpyruvate carboxylase	K01595	phosphoenolpyruvate carboxylase	EC:4.1.1.31	nnu01200	Carbon metabolism	Metabolism	Overview
TRINITY_DN27143_c1_g1	nnu:104611594	92.9	6e-97	-	phosphoenolpyruvate carboxylase	K01595	phosphoenolpyruvate carboxylase	EC:4.1.1.31	nnu00620	Pyruvate metabolism	Metabolism	Carbohydrate metabolism
TRINITY_DN27143_c1_g1	nnu:104611594	92.9	6e-97	-	phosphoenolpyruvate carboxylase	K01595	phosphoenolpyruvate carboxylase	EC:4.1.1.31	nnu00710	Carbon fixation in photosynthetic organisms	Metabolism	Energy metabolism
TRINITY_DN27143_c1_g2	egr:104449876	98.1	4.6e-117	-	ras-related protein Rab7	K07897	Ras-related protein Rab-7A	-	egr04144	Endocytosis	Cellular Processes	Transport and catabolism
TRINITY_DN27143_c1_g2	egr:104449876	98.1	4.6e-117	-	ras-related protein Rab7	K07897	Ras-related protein Rab-7A	-	egr04145	Phagosome	Cellular Processes	Transport and catabolism
TRINITY_DN27143_c1_g4	egu:105043985	92.6	4.8e-240	-	phosphoenolpyruvate carboxylase	K01595	phosphoenolpyruvate carboxylase	EC:4.1.1.31	egu01200	Carbon metabolism	Metabolism	Overview
TRINITY_DN27143_c1_g4	egu:105043985	92.6	4.8e-240	-	phosphoenolpyruvate carboxylase	K01595	phosphoenolpyruvate carboxylase	EC:4.1.1.31	egu00620	Pyruvate metabolism	Metabolism	Carbohydrate metabolism
TRINITY_DN27143_c1_g4	egu:105043985	92.6	4.8e-240	-	phosphoenolpyruvate carboxylase	K01595	phosphoenolpyruvate carboxylase	EC:4.1.1.31	egu00710	Carbon fixation in photosynthetic organisms	Metabolism	Energy metabolism
TRINITY_DN27143_c1_g5	pper:PRUPE_ppa002020mg	92.5	3.3e-29	-	hypothetical protein	K01595	phosphoenolpyruvate carboxylase	EC:4.1.1.31	pper01200	Carbon metabolism	Metabolism	Overview
TRINITY_DN27143_c1_g5	pper:PRUPE_ppa002020mg	92.5	3.3e-29	-	hypothetical protein	K01595	phosphoenolpyruvate carboxylase	EC:4.1.1.31	pper00620	Pyruvate metabolism	Metabolism	Carbohydrate metabolism
TRINITY_DN27143_c1_g5	pper:PRUPE_ppa002020mg	92.5	3.3e-29	-	hypothetical protein	K01595	phosphoenolpyruvate carboxylase	EC:4.1.1.31	pper00710	Carbon fixation in photosynthetic organisms	Metabolism	Energy metabolism
TRINITY_DN27144_c0_g1	pmum:103329254	81.7	0	-	phytochrome C	K12120	phytochrome A	-	pmum04712	Circadian rhythm - plant	Organismal Systems	Environmental adaptation
TRINITY_DN27144_c0_g3	vvi:100258014	89.2	4.9e-38	-	phytochrome C	K12120	phytochrome A	-	vvi04712	Circadian rhythm - plant	Organismal Systems	Environmental adaptation
TRINITY_DN27144_c0_g4	tcc:TCM_002400	92.4	4.9e-47	-	Phytochrome C isoform 1	K12120	phytochrome A	-	tcc04712	Circadian rhythm - plant	Organismal Systems	Environmental adaptation
TRINITY_DN27145_c0_g2	fve:101298130	83.9	3.4e-175	-	autophagy protein 5	K08339	autophagy-related protein 5	-	fve04140	Regulation of autophagy	Cellular Processes	Transport and catabolism
TRINITY_DN27145_c0_g3	gra:105803646	65.9	3.3e-11	-	autophagy protein 5	K08339	autophagy-related protein 5	-	gra04140	Regulation of autophagy	Cellular Processes	Transport and catabolism
TRINITY_DN27146_c0_g1	fve:101303171	67.4	1.2e-63	-	tripartite motif-containing protein 47-like	K10666	E3 ubiquitin-protein ligase RNF5	EC:2.3.2.27	fve04141	Protein processing in endoplasmic reticulum	Genetic Information Processing	Folding, sorting and degradation
TRINITY_DN27147_c0_g1	fve:101303237	92.8	1.1e-172	-	violaxanthin de-epoxidase	K09839	violaxanthin de-epoxidase	EC:1.23.5.1	fve00906	Carotenoid biosynthesis	Metabolism	Metabolism of terpenoids and polyketides
TRINITY_DN27148_c1_g2	brp:103842067	45.7	6.6e-09	-	dnaJ homolog subfamily B member 11	K09517	DnaJ homolog subfamily B member 11	-	brp04141	Protein processing in endoplasmic reticulum	Genetic Information Processing	Folding, sorting and degradation
TRINITY_DN27150_c1_g1	zma:100192545	74.9	1.1e-101	-	uncharacterized LOC100192545	K14758	casein kinase I homolog HRR25	EC:2.7.11.1	zma03008	Ribosome biogenesis in eukaryotes	Genetic Information Processing	Translation
TRINITY_DN27150_c1_g2	gra:105802822	92.6	4.2e-46	-	ras-related protein RABA3-like	K07904	Ras-related protein Rab-11A	-	gra04144	Endocytosis	Cellular Processes	Transport and catabolism
TRINITY_DN27150_c1_g4	jcu:105638435	87	5e-28	-	glutamyl-tRNA(Gln) amidotransferase subunit B	K02434	aspartyl-tRNA(Asn)/glutamyl-tRNA(Gln) amidotransferase subunit B	EC:6.3.5.6 6.3.5.7	jcu00970	Aminoacyl-tRNA biosynthesis	Genetic Information Processing	Translation
TRINITY_DN27150_c1_g6	nnu:104602751	89.7	3.6e-31	-	glutamyl-tRNA(Gln) amidotransferase subunit B	K02434	aspartyl-tRNA(Asn)/glutamyl-tRNA(Gln) amidotransferase subunit B	EC:6.3.5.6 6.3.5.7	nnu00970	Aminoacyl-tRNA biosynthesis	Genetic Information Processing	Translation
TRINITY_DN27150_c1_g7	jcu:105642804	75	9.8e-36	-	ras-related protein RABA3	K07904	Ras-related protein Rab-11A	-	jcu04144	Endocytosis	Cellular Processes	Transport and catabolism
TRINITY_DN27150_c1_g8	zma:100192545	80.2	1.2e-44	-	uncharacterized LOC100192545	K14758	casein kinase I homolog HRR25	EC:2.7.11.1	zma03008	Ribosome biogenesis in eukaryotes	Genetic Information Processing	Translation
TRINITY_DN27151_c0_g1	fve:101291933	93.1	3.3e-165	-	cyclin-H1-1	K06634	cyclin H	-	fve03022	Basal transcription factors	Genetic Information Processing	Transcription
TRINITY_DN27151_c0_g1	fve:101291933	93.1	3.3e-165	-	cyclin-H1-1	K06634	cyclin H	-	fve03420	Nucleotide excision repair	Genetic Information Processing	Replication and repair
TRINITY_DN27152_c0_g1	cic:CICLE_v10013498mg	21.8	1.5e-13	-	hypothetical protein	K01535	H+-transporting ATPase	EC:3.6.3.6	cic00190	Oxidative phosphorylation	Metabolism	Energy metabolism
TRINITY_DN27152_c0_g2	zma:100383137	23	1.1e-19	-	hypothetical protein	K01535	H+-transporting ATPase	EC:3.6.3.6	zma00190	Oxidative phosphorylation	Metabolism	Energy metabolism
TRINITY_DN27153_c0_g1	bdi:100833269	61	4.6e-156	-	protein SPA1-RELATED 4-like	K10143	E3 ubiquitin-protein ligase RFWD2	EC:2.3.2.27	bdi04120	Ubiquitin mediated proteolysis	Genetic Information Processing	Folding, sorting and degradation
TRINITY_DN27153_c0_g1	bdi:100833269	61	4.6e-156	-	protein SPA1-RELATED 4-like	K10143	E3 ubiquitin-protein ligase RFWD2	EC:2.3.2.27	bdi04712	Circadian rhythm - plant	Organismal Systems	Environmental adaptation
TRINITY_DN27154_c0_g2	csl:COCSUDRAFT_65874	36.1	1.5e-89	-	hypothetical protein	K14544	U3 small nucleolar RNA-associated protein 22	-	csl03008	Ribosome biogenesis in eukaryotes	Genetic Information Processing	Translation
TRINITY_DN27154_c0_g4	nnu:104600215	75.3	2.1e-94	-	2-C-methyl-D-erythritol 2	K01770	2-C-methyl-D-erythritol 2,4-cyclodiphosphate synthase	EC:4.6.1.12	nnu00900	Terpenoid backbone biosynthesis	Metabolism	Metabolism of terpenoids and polyketides
TRINITY_DN27155_c0_g1	fve:101290752	90.5	0	-	probable 1-deoxy-D-xylulose-5-phosphate synthase	K01662	1-deoxy-D-xylulose-5-phosphate synthase	EC:2.2.1.7	fve00730	Thiamine metabolism	Metabolism	Metabolism of cofactors and vitamins
TRINITY_DN27155_c0_g1	fve:101290752	90.5	0	-	probable 1-deoxy-D-xylulose-5-phosphate synthase	K01662	1-deoxy-D-xylulose-5-phosphate synthase	EC:2.2.1.7	fve00900	Terpenoid backbone biosynthesis	Metabolism	Metabolism of terpenoids and polyketides
TRINITY_DN27155_c0_g2	egu:105035100	93	1.4e-172	-	probable 1-deoxy-D-xylulose-5-phosphate synthase	K01662	1-deoxy-D-xylulose-5-phosphate synthase	EC:2.2.1.7	egu00730	Thiamine metabolism	Metabolism	Metabolism of cofactors and vitamins
TRINITY_DN27155_c0_g2	egu:105035100	93	1.4e-172	-	probable 1-deoxy-D-xylulose-5-phosphate synthase	K01662	1-deoxy-D-xylulose-5-phosphate synthase	EC:2.2.1.7	egu00900	Terpenoid backbone biosynthesis	Metabolism	Metabolism of terpenoids and polyketides
TRINITY_DN27158_c0_g1	egr:104418186	37.8	5.6e-61	-	systemin receptor SR160-like	K13415	protein brassinosteroid insensitive 1	EC:2.7.10.1 2.7.11.1	egr04075	Plant hormone signal transduction	Environmental Information Processing	Signal transduction
TRINITY_DN27158_c2_g1	sbi:SORBI_03g032990	43.3	2.1e-55	SORBIDRAFT_03g032990	hypothetical protein	K13415	protein brassinosteroid insensitive 1	EC:2.7.10.1 2.7.11.1	sbi04075	Plant hormone signal transduction	Environmental Information Processing	Signal transduction
TRINITY_DN27159_c1_g1	cic:CICLE_v10027727mg	32.4	7e-38	-	hypothetical protein	K00679	phospholipid:diacylglycerol acyltransferase	EC:2.3.1.158	cic00561	Glycerolipid metabolism	Metabolism	Lipid metabolism
TRINITY_DN27160_c0_g3	fve:101301721	94.3	1.6e-220	-	protein DJ-1 homolog D	K18881	D-lactate dehydratase	EC:4.2.1.130	fve00620	Pyruvate metabolism	Metabolism	Carbohydrate metabolism
TRINITY_DN27161_c0_g1	fve:101315076	84.5	9.2e-166	-	homogentisate solanesyltransferase	K12501	homogentisate solanesyltransferase	EC:2.5.1.117	fve00130	Ubiquinone and other terpenoid-quinone biosynthesis	Metabolism	Metabolism of cofactors and vitamins
TRINITY_DN27162_c0_g1	fve:101295480	71	8.2e-97	-	cleavage stimulating factor 64-like	K14407	cleavage stimulation factor subunit 2	-	fve03015	mRNA surveillance pathway	Genetic Information Processing	Translation
TRINITY_DN27162_c0_g2	jcu:105635047	48.3	1.3e-80	-	probable disease resistance protein At1g12280	K13459	disease resistance protein RPS2	-	jcu04626	Plant-pathogen interaction	Organismal Systems	Environmental adaptation
TRINITY_DN27162_c0_g3	mus:103987947	26.3	2.1e-18	-	calcium/calmodulin-dependent serine/threonine-protein kinase 1-like	K13412	calcium-dependent protein kinase	EC:2.7.11.1	mus04626	Plant-pathogen interaction	Organismal Systems	Environmental adaptation
TRINITY_DN27162_c0_g5	fve:101311063	97.9	4.1e-278	-	UDP-sulfoquinovose synthase	K06118	UDP-sulfoquinovose synthase	EC:3.13.1.1	fve00520	Amino sugar and nucleotide sugar metabolism	Metabolism	Carbohydrate metabolism
TRINITY_DN27162_c0_g5	fve:101311063	97.9	4.1e-278	-	UDP-sulfoquinovose synthase	K06118	UDP-sulfoquinovose synthase	EC:3.13.1.1	fve00561	Glycerolipid metabolism	Metabolism	Lipid metabolism
TRINITY_DN27164_c0_g2	fve:101302319	87.5	9e-165	-	probable indole-3-acetic acid-amido synthetase GH3.6	K14487	auxin responsive GH3 gene family	-	fve04075	Plant hormone signal transduction	Environmental Information Processing	Signal transduction
TRINITY_DN27164_c0_g3	fve:101298216	93.2	6.3e-55	-	probable acyl-activating enzyme 16	K01897	long-chain acyl-CoA synthetase	EC:6.2.1.3	fve01212	Fatty acid metabolism	Metabolism	Overview
TRINITY_DN27164_c0_g3	fve:101298216	93.2	6.3e-55	-	probable acyl-activating enzyme 16	K01897	long-chain acyl-CoA synthetase	EC:6.2.1.3	fve00061	Fatty acid biosynthesis	Metabolism	Lipid metabolism
TRINITY_DN27164_c0_g3	fve:101298216	93.2	6.3e-55	-	probable acyl-activating enzyme 16	K01897	long-chain acyl-CoA synthetase	EC:6.2.1.3	fve00071	Fatty acid degradation	Metabolism	Lipid metabolism
TRINITY_DN27164_c0_g3	fve:101298216	93.2	6.3e-55	-	probable acyl-activating enzyme 16	K01897	long-chain acyl-CoA synthetase	EC:6.2.1.3	fve04146	Peroxisome	Cellular Processes	Transport and catabolism
TRINITY_DN27169_c1_g6	fve:101296148	87.8	3.8e-91	-	DNA mismatch repair protein MSH3	K08736	DNA mismatch repair protein MSH3	-	fve03430	Mismatch repair	Genetic Information Processing	Replication and repair
TRINITY_DN27170_c0_g1	mdm:103420792	52.3	6.3e-74	-	cyclic nucleotide-gated ion channel 1-like	K05391	cyclic nucleotide gated channel, other eukaryote	-	mdm04626	Plant-pathogen interaction	Organismal Systems	Environmental adaptation
TRINITY_DN27170_c0_g2	pmum:103333626	61.4	3.5e-90	-	cyclic nucleotide-gated ion channel 1-like	K05391	cyclic nucleotide gated channel, other eukaryote	-	pmum04626	Plant-pathogen interaction	Organismal Systems	Environmental adaptation
TRINITY_DN27170_c0_g3	fve:101314040	85.8	8.8e-133	-	cyclic nucleotide-gated ion channel 1-like	K05391	cyclic nucleotide gated channel, other eukaryote	-	fve04626	Plant-pathogen interaction	Organismal Systems	Environmental adaptation
TRINITY_DN27170_c0_g4	pmum:103333626	62.4	2.2e-51	-	cyclic nucleotide-gated ion channel 1-like	K05391	cyclic nucleotide gated channel, other eukaryote	-	pmum04626	Plant-pathogen interaction	Organismal Systems	Environmental adaptation
TRINITY_DN27170_c0_g5	pmum:103333626	54.6	1.8e-74	-	cyclic nucleotide-gated ion channel 1-like	K05391	cyclic nucleotide gated channel, other eukaryote	-	pmum04626	Plant-pathogen interaction	Organismal Systems	Environmental adaptation
TRINITY_DN27170_c0_g6	fve:101308225	45.1	2.3e-11	-	cyclic nucleotide-gated ion channel 1-like	K05391	cyclic nucleotide gated channel, other eukaryote	-	fve04626	Plant-pathogen interaction	Organismal Systems	Environmental adaptation
TRINITY_DN27172_c1_g1	fve:101312886	69.7	3.1e-16	-	peroxisome biogenesis protein 6	K13339	peroxin-6	-	fve04146	Peroxisome	Cellular Processes	Transport and catabolism
TRINITY_DN27172_c1_g3	cam:101488676	24.6	1.5e-09	-	protein SPA1-RELATED 4-like	K10143	E3 ubiquitin-protein ligase RFWD2	EC:2.3.2.27	cam04120	Ubiquitin mediated proteolysis	Genetic Information Processing	Folding, sorting and degradation
TRINITY_DN27172_c1_g3	cam:101488676	24.6	1.5e-09	-	protein SPA1-RELATED 4-like	K10143	E3 ubiquitin-protein ligase RFWD2	EC:2.3.2.27	cam04712	Circadian rhythm - plant	Organismal Systems	Environmental adaptation
TRINITY_DN27173_c1_g1	fve:101301743	82.2	0	-	exosome component 10	K12591	exosome complex exonuclease RRP6	EC:3.1.13.-	fve03018	RNA degradation	Genetic Information Processing	Folding, sorting and degradation
TRINITY_DN27174_c0_g1	fve:101299277	96.1	6.7e-217	-	PAP-specific phosphatase HAL2-like	K01082	3'(2'), 5'-bisphosphate nucleotidase	EC:3.1.3.7	fve00920	Sulfur metabolism	Metabolism	Energy metabolism
TRINITY_DN27174_c0_g2	fve:101298775	91.7	1.8e-239	-	PAP-specific phosphatase HAL2-like	K01082	3'(2'), 5'-bisphosphate nucleotidase	EC:3.1.3.7	fve00920	Sulfur metabolism	Metabolism	Energy metabolism
TRINITY_DN27175_c0_g5	bdi:100823425	49.6	7.5e-29	-	serine/threonine-protein kinase CDL1-like	K13430	serine/threonine-protein kinase PBS1	EC:2.7.11.1	bdi04626	Plant-pathogen interaction	Organismal Systems	Environmental adaptation
TRINITY_DN27176_c1_g5	nnu:104600195	95.6	2.6e-143	-	heat shock protein 83	K04079	molecular chaperone HtpG	-	nnu04141	Protein processing in endoplasmic reticulum	Genetic Information Processing	Folding, sorting and degradation
TRINITY_DN27176_c1_g5	nnu:104600195	95.6	2.6e-143	-	heat shock protein 83	K04079	molecular chaperone HtpG	-	nnu04626	Plant-pathogen interaction	Organismal Systems	Environmental adaptation
TRINITY_DN27177_c0_g1	zma:103637360	40.2	2.7e-13	GRMZM2G459373	GTP-binding nuclear protein Ran1B-like	K07936	GTP-binding nuclear protein Ran	-	zma03013	RNA transport	Genetic Information Processing	Translation
TRINITY_DN27177_c0_g1	zma:103637360	40.2	2.7e-13	GRMZM2G459373	GTP-binding nuclear protein Ran1B-like	K07936	GTP-binding nuclear protein Ran	-	zma03008	Ribosome biogenesis in eukaryotes	Genetic Information Processing	Translation
TRINITY_DN27178_c0_g1	pvu:PHAVU_004G075100g	100	1.7e-86	-	hypothetical protein	K03231	elongation factor 1-alpha	-	pvu03013	RNA transport	Genetic Information Processing	Translation
TRINITY_DN27178_c0_g2	jcu:105642186	98.7	5.1e-260	-	elongation factor 1-alpha	K03231	elongation factor 1-alpha	-	jcu03013	RNA transport	Genetic Information Processing	Translation
TRINITY_DN27178_c0_g3	fve:101305005	99	3.3e-111	-	elongation factor 1-alpha	K03231	elongation factor 1-alpha	-	fve03013	RNA transport	Genetic Information Processing	Translation
TRINITY_DN27179_c0_g1	cit:102622554	46.3	2.2e-30	-	pentatricopeptide repeat-containing protein At4g16470-like	K00857	thymidine kinase	EC:2.7.1.21	cit00240	Pyrimidine metabolism	Metabolism	Nucleotide metabolism
TRINITY_DN27180_c0_g1	smo:SELMODRAFT_443106	35.2	5.6e-15	-	hypothetical protein	K14493	gibberellin receptor GID1	EC:3.-.-.-	smo04075	Plant hormone signal transduction	Environmental Information Processing	Signal transduction
TRINITY_DN27182_c0_g1	fve:101305881	90.6	9.9e-136	-	ribosomal RNA small subunit methyltransferase nep-1	K14568	rRNA small subunit pseudouridine methyltransferase Nep1	EC:2.1.1.260	fve03008	Ribosome biogenesis in eukaryotes	Genetic Information Processing	Translation
TRINITY_DN27184_c0_g1	sind:105169970	96.9	3.6e-48	-	AP-2 complex subunit alpha-1-like	K11824	AP-2 complex subunit alpha	-	sind04144	Endocytosis	Cellular Processes	Transport and catabolism
TRINITY_DN27184_c0_g2	nnu:104587454	81.4	2.9e-212	-	AP-2 complex subunit alpha-1-like	K11824	AP-2 complex subunit alpha	-	nnu04144	Endocytosis	Cellular Processes	Transport and catabolism
TRINITY_DN27184_c0_g4	fve:101302334	96.5	0	-	AP-2 complex subunit alpha-1-like	K11824	AP-2 complex subunit alpha	-	fve04144	Endocytosis	Cellular Processes	Transport and catabolism
TRINITY_DN27187_c0_g2	egu:105032412	93.3	2e-113	-	40S ribosomal protein S8-like	K02995	small subunit ribosomal protein S8e	-	egu03010	Ribosome	Genetic Information Processing	Translation
TRINITY_DN27187_c0_g3	fve:101297611	64.4	5.9e-17	-	alpha-L-fucosidase 2-like	K15923	alpha-L-fucosidase 2	EC:3.2.1.51	fve00511	Other glycan degradation	Metabolism	Glycan biosynthesis and metabolism
TRINITY_DN27187_c0_g4	fve:101297401	67.8	3.6e-130	-	alcohol dehydrogenase-like 7	K00121	S-(hydroxymethyl)glutathione dehydrogenase / alcohol dehydrogenase	EC:1.1.1.284 1.1.1.1	fve01200	Carbon metabolism	Metabolism	Overview
TRINITY_DN27187_c0_g4	fve:101297401	67.8	3.6e-130	-	alcohol dehydrogenase-like 7	K00121	S-(hydroxymethyl)glutathione dehydrogenase / alcohol dehydrogenase	EC:1.1.1.284 1.1.1.1	fve00010	Glycolysis / Gluconeogenesis	Metabolism	Carbohydrate metabolism
TRINITY_DN27187_c0_g4	fve:101297401	67.8	3.6e-130	-	alcohol dehydrogenase-like 7	K00121	S-(hydroxymethyl)glutathione dehydrogenase / alcohol dehydrogenase	EC:1.1.1.284 1.1.1.1	fve00071	Fatty acid degradation	Metabolism	Lipid metabolism
TRINITY_DN27187_c0_g4	fve:101297401	67.8	3.6e-130	-	alcohol dehydrogenase-like 7	K00121	S-(hydroxymethyl)glutathione dehydrogenase / alcohol dehydrogenase	EC:1.1.1.284 1.1.1.1	fve00350	Tyrosine metabolism	Metabolism	Amino acid metabolism
TRINITY_DN27187_c0_g5	fve:101296458	89.1	5.9e-171	-	alpha-L-fucosidase 2	K15923	alpha-L-fucosidase 2	EC:3.2.1.51	fve00511	Other glycan degradation	Metabolism	Glycan biosynthesis and metabolism
TRINITY_DN27187_c0_g6	gra:105762790	83.8	2e-30	-	alpha-L-fucosidase 2-like	K15923	alpha-L-fucosidase 2	EC:3.2.1.51	gra00511	Other glycan degradation	Metabolism	Glycan biosynthesis and metabolism
TRINITY_DN27187_c0_g7	fve:101296458	94.5	0	-	alpha-L-fucosidase 2	K15923	alpha-L-fucosidase 2	EC:3.2.1.51	fve00511	Other glycan degradation	Metabolism	Glycan biosynthesis and metabolism
TRINITY_DN27187_c0_g8	egu:105056147	77.1	1.5e-35	-	alpha-L-fucosidase 2-like	K15923	alpha-L-fucosidase 2	EC:3.2.1.51	egu00511	Other glycan degradation	Metabolism	Glycan biosynthesis and metabolism
TRINITY_DN27187_c0_g9	egu:105056147	71.6	6.6e-37	-	alpha-L-fucosidase 2-like	K15923	alpha-L-fucosidase 2	EC:3.2.1.51	egu00511	Other glycan degradation	Metabolism	Glycan biosynthesis and metabolism
TRINITY_DN27188_c1_g1	mdm:103438814	88.3	2.2e-45	-	ribosomal protein S14	K02954	small subunit ribosomal protein S14	-	mdm03010	Ribosome	Genetic Information Processing	Translation
TRINITY_DN27189_c0_g1	tcc:TCM_035063	39.9	3.1e-64	-	Flavonol synthase	K05278	flavonol synthase	EC:1.14.11.23	tcc00941	Flavonoid biosynthesis	Metabolism	Biosynthesis of other secondary metabolites
TRINITY_DN2718_c0_g1	cre:CHLREDRAFT_155455	77.7	2e-19	RPL27a	ribosomal protein L27a, component of cytosolic 80S ribosome and 60S large subunit	K02900	large subunit ribosomal protein L27Ae	-	cre03010	Ribosome	Genetic Information Processing	Translation
TRINITY_DN27190_c0_g1	fve:101292810	94.7	8.6e-144	-	xanthoxin dehydrogenase	K09841	xanthoxin dehydrogenase	EC:1.1.1.288	fve00906	Carotenoid biosynthesis	Metabolism	Metabolism of terpenoids and polyketides
TRINITY_DN27191_c0_g1	fve:101309212	93.2	2.4e-224	-	aspartate aminotransferase	K14454	aspartate aminotransferase, cytoplasmic	EC:2.6.1.1	fve01200	Carbon metabolism	Metabolism	Overview
TRINITY_DN27191_c0_g1	fve:101309212	93.2	2.4e-224	-	aspartate aminotransferase	K14454	aspartate aminotransferase, cytoplasmic	EC:2.6.1.1	fve01210	2-Oxocarboxylic acid metabolism	Metabolism	Overview
TRINITY_DN27191_c0_g1	fve:101309212	93.2	2.4e-224	-	aspartate aminotransferase	K14454	aspartate aminotransferase, cytoplasmic	EC:2.6.1.1	fve01230	Biosynthesis of amino acids	Metabolism	Overview
TRINITY_DN27191_c0_g1	fve:101309212	93.2	2.4e-224	-	aspartate aminotransferase	K14454	aspartate aminotransferase, cytoplasmic	EC:2.6.1.1	fve00710	Carbon fixation in photosynthetic organisms	Metabolism	Energy metabolism
TRINITY_DN27191_c0_g1	fve:101309212	93.2	2.4e-224	-	aspartate aminotransferase	K14454	aspartate aminotransferase, cytoplasmic	EC:2.6.1.1	fve00250	Alanine, aspartate and glutamate metabolism	Metabolism	Amino acid metabolism
TRINITY_DN27191_c0_g1	fve:101309212	93.2	2.4e-224	-	aspartate aminotransferase	K14454	aspartate aminotransferase, cytoplasmic	EC:2.6.1.1	fve00270	Cysteine and methionine metabolism	Metabolism	Amino acid metabolism
TRINITY_DN27191_c0_g1	fve:101309212	93.2	2.4e-224	-	aspartate aminotransferase	K14454	aspartate aminotransferase, cytoplasmic	EC:2.6.1.1	fve00220	Arginine biosynthesis	Metabolism	Amino acid metabolism
TRINITY_DN27191_c0_g1	fve:101309212	93.2	2.4e-224	-	aspartate aminotransferase	K14454	aspartate aminotransferase, cytoplasmic	EC:2.6.1.1	fve00330	Arginine and proline metabolism	Metabolism	Amino acid metabolism
TRINITY_DN27191_c0_g1	fve:101309212	93.2	2.4e-224	-	aspartate aminotransferase	K14454	aspartate aminotransferase, cytoplasmic	EC:2.6.1.1	fve00350	Tyrosine metabolism	Metabolism	Amino acid metabolism
TRINITY_DN27191_c0_g1	fve:101309212	93.2	2.4e-224	-	aspartate aminotransferase	K14454	aspartate aminotransferase, cytoplasmic	EC:2.6.1.1	fve00360	Phenylalanine metabolism	Metabolism	Amino acid metabolism
TRINITY_DN27191_c0_g1	fve:101309212	93.2	2.4e-224	-	aspartate aminotransferase	K14454	aspartate aminotransferase, cytoplasmic	EC:2.6.1.1	fve00400	Phenylalanine, tyrosine and tryptophan biosynthesis	Metabolism	Amino acid metabolism
TRINITY_DN27191_c0_g1	fve:101309212	93.2	2.4e-224	-	aspartate aminotransferase	K14454	aspartate aminotransferase, cytoplasmic	EC:2.6.1.1	fve00950	Isoquinoline alkaloid biosynthesis	Metabolism	Biosynthesis of other secondary metabolites
TRINITY_DN27191_c0_g1	fve:101309212	93.2	2.4e-224	-	aspartate aminotransferase	K14454	aspartate aminotransferase, cytoplasmic	EC:2.6.1.1	fve00960	Tropane, piperidine and pyridine alkaloid biosynthesis	Metabolism	Biosynthesis of other secondary metabolites
TRINITY_DN27196_c0_g1	bdi:100823425	43.1	2.2e-63	-	serine/threonine-protein kinase CDL1-like	K13430	serine/threonine-protein kinase PBS1	EC:2.7.11.1	bdi04626	Plant-pathogen interaction	Organismal Systems	Environmental adaptation
TRINITY_DN27197_c0_g1	vvi:100854216	81.7	4.2e-193	-	phosphoserine aminotransferase 2	K00831	phosphoserine aminotransferase	EC:2.6.1.52	vvi01200	Carbon metabolism	Metabolism	Overview
TRINITY_DN27197_c0_g1	vvi:100854216	81.7	4.2e-193	-	phosphoserine aminotransferase 2	K00831	phosphoserine aminotransferase	EC:2.6.1.52	vvi01230	Biosynthesis of amino acids	Metabolism	Overview
TRINITY_DN27197_c0_g1	vvi:100854216	81.7	4.2e-193	-	phosphoserine aminotransferase 2	K00831	phosphoserine aminotransferase	EC:2.6.1.52	vvi00260	Glycine, serine and threonine metabolism	Metabolism	Amino acid metabolism
TRINITY_DN27197_c0_g1	vvi:100854216	81.7	4.2e-193	-	phosphoserine aminotransferase 2	K00831	phosphoserine aminotransferase	EC:2.6.1.52	vvi00750	Vitamin B6 metabolism	Metabolism	Metabolism of cofactors and vitamins
TRINITY_DN27198_c0_g3	fve:101313376	89.3	6.3e-118	-	pectinesterase-like	K01051	pectinesterase	EC:3.1.1.11	fve00040	Pentose and glucuronate interconversions	Metabolism	Carbohydrate metabolism
TRINITY_DN27198_c0_g3	fve:101313376	89.3	6.3e-118	-	pectinesterase-like	K01051	pectinesterase	EC:3.1.1.11	fve00500	Starch and sucrose metabolism	Metabolism	Carbohydrate metabolism
TRINITY_DN27198_c0_g4	rcu:RCOM_1616660	42.9	8.4e-22	-	WRKY transcription factor	K13425	WRKY transcription factor 22	-	rcu04626	Plant-pathogen interaction	Organismal Systems	Environmental adaptation
TRINITY_DN27199_c0_g1	gra:105798481	43.4	5.8e-61	-	serine/threonine-protein kinase CDL1-like	K13430	serine/threonine-protein kinase PBS1	EC:2.7.11.1	gra04626	Plant-pathogen interaction	Organismal Systems	Environmental adaptation
TRINITY_DN27200_c0_g1	sly:101258102	37.7	5.7e-10	-	peroxisomal fatty acid beta-oxidation multifunctional protein MFP2	K10527	enoyl-CoA hydratase/3-hydroxyacyl-CoA dehydrogenase	EC:4.2.1.17 1.1.1.35 1.1.1.211	sly01212	Fatty acid metabolism	Metabolism	Overview
TRINITY_DN27200_c0_g1	sly:101258102	37.7	5.7e-10	-	peroxisomal fatty acid beta-oxidation multifunctional protein MFP2	K10527	enoyl-CoA hydratase/3-hydroxyacyl-CoA dehydrogenase	EC:4.2.1.17 1.1.1.35 1.1.1.211	sly00071	Fatty acid degradation	Metabolism	Lipid metabolism
TRINITY_DN27200_c0_g1	sly:101258102	37.7	5.7e-10	-	peroxisomal fatty acid beta-oxidation multifunctional protein MFP2	K10527	enoyl-CoA hydratase/3-hydroxyacyl-CoA dehydrogenase	EC:4.2.1.17 1.1.1.35 1.1.1.211	sly00592	alpha-Linolenic acid metabolism	Metabolism	Lipid metabolism
TRINITY_DN27200_c0_g2	sly:101258102	76	2.4e-18	-	peroxisomal fatty acid beta-oxidation multifunctional protein MFP2	K10527	enoyl-CoA hydratase/3-hydroxyacyl-CoA dehydrogenase	EC:4.2.1.17 1.1.1.35 1.1.1.211	sly01212	Fatty acid metabolism	Metabolism	Overview
TRINITY_DN27200_c0_g2	sly:101258102	76	2.4e-18	-	peroxisomal fatty acid beta-oxidation multifunctional protein MFP2	K10527	enoyl-CoA hydratase/3-hydroxyacyl-CoA dehydrogenase	EC:4.2.1.17 1.1.1.35 1.1.1.211	sly00071	Fatty acid degradation	Metabolism	Lipid metabolism
TRINITY_DN27200_c0_g2	sly:101258102	76	2.4e-18	-	peroxisomal fatty acid beta-oxidation multifunctional protein MFP2	K10527	enoyl-CoA hydratase/3-hydroxyacyl-CoA dehydrogenase	EC:4.2.1.17 1.1.1.35 1.1.1.211	sly00592	alpha-Linolenic acid metabolism	Metabolism	Lipid metabolism
TRINITY_DN27200_c0_g3	sly:101258102	82.1	8.1e-08	-	peroxisomal fatty acid beta-oxidation multifunctional protein MFP2	K10527	enoyl-CoA hydratase/3-hydroxyacyl-CoA dehydrogenase	EC:4.2.1.17 1.1.1.35 1.1.1.211	sly01212	Fatty acid metabolism	Metabolism	Overview
TRINITY_DN27200_c0_g3	sly:101258102	82.1	8.1e-08	-	peroxisomal fatty acid beta-oxidation multifunctional protein MFP2	K10527	enoyl-CoA hydratase/3-hydroxyacyl-CoA dehydrogenase	EC:4.2.1.17 1.1.1.35 1.1.1.211	sly00071	Fatty acid degradation	Metabolism	Lipid metabolism
TRINITY_DN27200_c0_g3	sly:101258102	82.1	8.1e-08	-	peroxisomal fatty acid beta-oxidation multifunctional protein MFP2	K10527	enoyl-CoA hydratase/3-hydroxyacyl-CoA dehydrogenase	EC:4.2.1.17 1.1.1.35 1.1.1.211	sly00592	alpha-Linolenic acid metabolism	Metabolism	Lipid metabolism
TRINITY_DN27200_c0_g4	sly:101258102	36.2	1.9e-09	-	peroxisomal fatty acid beta-oxidation multifunctional protein MFP2	K10527	enoyl-CoA hydratase/3-hydroxyacyl-CoA dehydrogenase	EC:4.2.1.17 1.1.1.35 1.1.1.211	sly01212	Fatty acid metabolism	Metabolism	Overview
TRINITY_DN27200_c0_g4	sly:101258102	36.2	1.9e-09	-	peroxisomal fatty acid beta-oxidation multifunctional protein MFP2	K10527	enoyl-CoA hydratase/3-hydroxyacyl-CoA dehydrogenase	EC:4.2.1.17 1.1.1.35 1.1.1.211	sly00071	Fatty acid degradation	Metabolism	Lipid metabolism
TRINITY_DN27200_c0_g4	sly:101258102	36.2	1.9e-09	-	peroxisomal fatty acid beta-oxidation multifunctional protein MFP2	K10527	enoyl-CoA hydratase/3-hydroxyacyl-CoA dehydrogenase	EC:4.2.1.17 1.1.1.35 1.1.1.211	sly00592	alpha-Linolenic acid metabolism	Metabolism	Lipid metabolism
TRINITY_DN27202_c0_g2	mtr:MTR_7g058700	30.2	1.2e-29	-	tyrosine/DOPA decarboxylase	K01592	tyrosine decarboxylase	EC:4.1.1.25	mtr00350	Tyrosine metabolism	Metabolism	Amino acid metabolism
TRINITY_DN27202_c0_g2	mtr:MTR_7g058700	30.2	1.2e-29	-	tyrosine/DOPA decarboxylase	K01592	tyrosine decarboxylase	EC:4.1.1.25	mtr00950	Isoquinoline alkaloid biosynthesis	Metabolism	Biosynthesis of other secondary metabolites
TRINITY_DN27203_c1_g3	pxb:103946067	24.3	8.7e-10	-	disease resistance protein RPM1-like	K13457	disease resistance protein RPM1	-	pxb04626	Plant-pathogen interaction	Organismal Systems	Environmental adaptation
TRINITY_DN27203_c1_g7	fve:101302671	87.1	9.1e-106	-	U4/U6 small nuclear ribonucleoprotein PRP4-like protein	K12662	U4/U6 small nuclear ribonucleoprotein PRP4	-	fve03040	Spliceosome	Genetic Information Processing	Transcription
TRINITY_DN27203_c1_g8	ota:Ot14g00400	64.4	1.9e-11	-	putative small nuclear ribonucleoprotein Prp4p (ISS)	K12662	U4/U6 small nuclear ribonucleoprotein PRP4	-	ota03040	Spliceosome	Genetic Information Processing	Transcription
TRINITY_DN27210_c0_g1	sbi:SORBI_07g008510	34.6	2.2e-32	SORBIDRAFT_07g008510	hypothetical protein	K00901	diacylglycerol kinase (ATP)	EC:2.7.1.107	sbi00561	Glycerolipid metabolism	Metabolism	Lipid metabolism
TRINITY_DN27210_c0_g1	sbi:SORBI_07g008510	34.6	2.2e-32	SORBIDRAFT_07g008510	hypothetical protein	K00901	diacylglycerol kinase (ATP)	EC:2.7.1.107	sbi00564	Glycerophospholipid metabolism	Metabolism	Lipid metabolism
TRINITY_DN27210_c0_g1	sbi:SORBI_07g008510	34.6	2.2e-32	SORBIDRAFT_07g008510	hypothetical protein	K00901	diacylglycerol kinase (ATP)	EC:2.7.1.107	sbi04070	Phosphatidylinositol signaling system	Environmental Information Processing	Signal transduction
TRINITY_DN27214_c1_g2	cam:101491841	49.1	2.5e-07	-	dnaJ protein P58IPK homolog	K09523	DnaJ homolog subfamily C member 3	-	cam04141	Protein processing in endoplasmic reticulum	Genetic Information Processing	Folding, sorting and degradation
TRINITY_DN27214_c1_g3	fve:101313066	98.6	5.7e-37	-	serine/arginine-rich splicing factor SR34A	K12890	splicing factor, arginine/serine-rich 1/9	-	fve03040	Spliceosome	Genetic Information Processing	Transcription
TRINITY_DN27215_c0_g3	fve:101294733	92.6	6.2e-59	-	ras-related protein RABA5a	K07904	Ras-related protein Rab-11A	-	fve04144	Endocytosis	Cellular Processes	Transport and catabolism
TRINITY_DN27217_c0_g1	fve:101311948	93	3.6e-191	-	2-oxoisovalerate dehydrogenase subunit beta 1	K00167	2-oxoisovalerate dehydrogenase E1 component beta subunit	EC:1.2.4.4	fve00640	Propanoate metabolism	Metabolism	Carbohydrate metabolism
TRINITY_DN27217_c0_g1	fve:101311948	93	3.6e-191	-	2-oxoisovalerate dehydrogenase subunit beta 1	K00167	2-oxoisovalerate dehydrogenase E1 component beta subunit	EC:1.2.4.4	fve00280	Valine, leucine and isoleucine degradation	Metabolism	Amino acid metabolism
TRINITY_DN27217_c0_g3	bna:106384804	71.6	1.8e-20	-	chaperone protein dnaJ 2-like	K09503	DnaJ homolog subfamily A member 2	-	bna04141	Protein processing in endoplasmic reticulum	Genetic Information Processing	Folding, sorting and degradation
TRINITY_DN27218_c0_g2	smo:SELMODRAFT_449237	40.2	3.5e-08	-	hypothetical protein	K14514	ethylene-insensitive protein 3	-	smo04075	Plant hormone signal transduction	Environmental Information Processing	Signal transduction
TRINITY_DN27219_c0_g8	mdm:103429864	71.3	8.4e-41	-	26S protease regulatory subunit 6B homolog	K03063	26S proteasome regulatory subunit T3	-	mdm03050	Proteasome	Genetic Information Processing	Folding, sorting and degradation
TRINITY_DN27220_c0_g1	tcc:TCM_020258	25.9	4.2e-17	-	Phenylalanyl-tRNA synthetase class IIc family protein	K01889	phenylalanyl-tRNA synthetase alpha chain	EC:6.1.1.20	tcc00970	Aminoacyl-tRNA biosynthesis	Genetic Information Processing	Translation
TRINITY_DN27221_c0_g1	gmx:100800522	68	3.3e-137	-	BRASSINOSTEROID INSENSITIVE 1-associated receptor kinase 1	K13416	brassinosteroid insensitive 1-associated receptor kinase 1	EC:2.7.10.1 2.7.11.1	gmx04075	Plant hormone signal transduction	Environmental Information Processing	Signal transduction
TRINITY_DN27221_c0_g1	gmx:100800522	68	3.3e-137	-	BRASSINOSTEROID INSENSITIVE 1-associated receptor kinase 1	K13416	brassinosteroid insensitive 1-associated receptor kinase 1	EC:2.7.10.1 2.7.11.1	gmx04626	Plant-pathogen interaction	Organismal Systems	Environmental adaptation
TRINITY_DN27224_c1_g1	nnu:104611028	83.3	2e-249	-	glutamate decarboxylase-like	K01580	glutamate decarboxylase	EC:4.1.1.15	nnu00650	Butanoate metabolism	Metabolism	Carbohydrate metabolism
TRINITY_DN27224_c1_g1	nnu:104611028	83.3	2e-249	-	glutamate decarboxylase-like	K01580	glutamate decarboxylase	EC:4.1.1.15	nnu00250	Alanine, aspartate and glutamate metabolism	Metabolism	Amino acid metabolism
TRINITY_DN27224_c1_g1	nnu:104611028	83.3	2e-249	-	glutamate decarboxylase-like	K01580	glutamate decarboxylase	EC:4.1.1.15	nnu00410	beta-Alanine metabolism	Metabolism	Metabolism of other amino acids
TRINITY_DN27224_c1_g1	nnu:104611028	83.3	2e-249	-	glutamate decarboxylase-like	K01580	glutamate decarboxylase	EC:4.1.1.15	nnu00430	Taurine and hypotaurine metabolism	Metabolism	Metabolism of other amino acids
TRINITY_DN27225_c0_g1	mis:MICPUN_60437	32	1.9e-35	-	E3 ubiquitin-protein ligase	K10615	E3 ubiquitin-protein ligase HERC4	EC:2.3.2.26	mis04120	Ubiquitin mediated proteolysis	Genetic Information Processing	Folding, sorting and degradation
TRINITY_DN27227_c0_g1	pvu:PHAVU_003G161200g	47.6	5.6e-101	-	hypothetical protein	K15639	PHYB activation tagged suppressor 1	EC:1.14.-.-	pvu00905	Brassinosteroid biosynthesis	Metabolism	Metabolism of terpenoids and polyketides
TRINITY_DN27230_c0_g2	ota:Ot09g03530	34.1	1.9e-16	-	RA54B_CHICK DNA repair and recombination protein RAD54B (ISS)	K10877	DNA repair and recombination protein RAD54B	EC:3.6.4.-	ota03440	Homologous recombination	Genetic Information Processing	Replication and repair
TRINITY_DN27232_c0_g1	obr:102714020	51.9	4.9e-37	-	nudix hydrolase 19	K03426	NAD+ diphosphatase	EC:3.6.1.22	obr00760	Nicotinate and nicotinamide metabolism	Metabolism	Metabolism of cofactors and vitamins
TRINITY_DN27232_c0_g1	obr:102714020	51.9	4.9e-37	-	nudix hydrolase 19	K03426	NAD+ diphosphatase	EC:3.6.1.22	obr04146	Peroxisome	Cellular Processes	Transport and catabolism
TRINITY_DN27232_c0_g2	obr:102714020	48.5	6.9e-15	-	nudix hydrolase 19	K03426	NAD+ diphosphatase	EC:3.6.1.22	obr00760	Nicotinate and nicotinamide metabolism	Metabolism	Metabolism of cofactors and vitamins
TRINITY_DN27232_c0_g2	obr:102714020	48.5	6.9e-15	-	nudix hydrolase 19	K03426	NAD+ diphosphatase	EC:3.6.1.22	obr04146	Peroxisome	Cellular Processes	Transport and catabolism
TRINITY_DN27232_c1_g3	fve:101311997	94.7	7.9e-191	-	carotenoid cleavage dioxygenase 7	K17912	9-cis-beta-carotene 9',10'-cleaving dioxygenase	EC:1.13.11.68	fve00906	Carotenoid biosynthesis	Metabolism	Metabolism of terpenoids and polyketides
TRINITY_DN27232_c1_g7	mdm:103401427	54.3	1.6e-17	-	uncharacterized LOC103401427	K13415	protein brassinosteroid insensitive 1	EC:2.7.10.1 2.7.11.1	mdm04075	Plant hormone signal transduction	Environmental Information Processing	Signal transduction
TRINITY_DN27233_c0_g1	sita:101773397	33.1	1.3e-34	-	PTI1-like tyrosine-protein kinase 1	K13436	pto-interacting protein 1	EC:2.7.11.1	sita04626	Plant-pathogen interaction	Organismal Systems	Environmental adaptation
TRINITY_DN27234_c1_g1	gmx:100777028	28.5	2.2e-10	-	guanine nucleotide-binding protein-like NSN1	K14538	nuclear GTP-binding protein	-	gmx03008	Ribosome biogenesis in eukaryotes	Genetic Information Processing	Translation
TRINITY_DN27235_c1_g3	mus:103984394	46.4	8.4e-37	-	uncharacterized protein LOC103984394	K14317	nuclear pore complex protein Nup214	-	mus03013	RNA transport	Genetic Information Processing	Translation
TRINITY_DN27237_c0_g1	pxb:103943992	61.3	2.6e-212	-	beta-galactosidase	K12309	beta-galactosidase	EC:3.2.1.23	pxb00052	Galactose metabolism	Metabolism	Carbohydrate metabolism
TRINITY_DN27237_c0_g1	pxb:103943992	61.3	2.6e-212	-	beta-galactosidase	K12309	beta-galactosidase	EC:3.2.1.23	pxb00600	Sphingolipid metabolism	Metabolism	Lipid metabolism
TRINITY_DN27237_c0_g1	pxb:103943992	61.3	2.6e-212	-	beta-galactosidase	K12309	beta-galactosidase	EC:3.2.1.23	pxb00531	Glycosaminoglycan degradation	Metabolism	Glycan biosynthesis and metabolism
TRINITY_DN27237_c0_g1	pxb:103943992	61.3	2.6e-212	-	beta-galactosidase	K12309	beta-galactosidase	EC:3.2.1.23	pxb00604	Glycosphingolipid biosynthesis - ganglio series	Metabolism	Glycan biosynthesis and metabolism
TRINITY_DN27237_c0_g1	pxb:103943992	61.3	2.6e-212	-	beta-galactosidase	K12309	beta-galactosidase	EC:3.2.1.23	pxb00511	Other glycan degradation	Metabolism	Glycan biosynthesis and metabolism
TRINITY_DN27238_c0_g1	fve:101309156	92.1	4.6e-230	-	galacturonokinase	K18677	galacturonokinase	EC:2.7.1.44	fve00520	Amino sugar and nucleotide sugar metabolism	Metabolism	Carbohydrate metabolism
TRINITY_DN27239_c1_g1	fve:101297877	94.9	1.4e-292	-	serine hydroxymethyltransferase 7	K00600	glycine hydroxymethyltransferase	EC:2.1.2.1	fve01200	Carbon metabolism	Metabolism	Overview
TRINITY_DN27239_c1_g1	fve:101297877	94.9	1.4e-292	-	serine hydroxymethyltransferase 7	K00600	glycine hydroxymethyltransferase	EC:2.1.2.1	fve01230	Biosynthesis of amino acids	Metabolism	Overview
TRINITY_DN27239_c1_g1	fve:101297877	94.9	1.4e-292	-	serine hydroxymethyltransferase 7	K00600	glycine hydroxymethyltransferase	EC:2.1.2.1	fve00630	Glyoxylate and dicarboxylate metabolism	Metabolism	Carbohydrate metabolism
TRINITY_DN27239_c1_g1	fve:101297877	94.9	1.4e-292	-	serine hydroxymethyltransferase 7	K00600	glycine hydroxymethyltransferase	EC:2.1.2.1	fve00260	Glycine, serine and threonine metabolism	Metabolism	Amino acid metabolism
TRINITY_DN27239_c1_g1	fve:101297877	94.9	1.4e-292	-	serine hydroxymethyltransferase 7	K00600	glycine hydroxymethyltransferase	EC:2.1.2.1	fve00460	Cyanoamino acid metabolism	Metabolism	Metabolism of other amino acids
TRINITY_DN27239_c1_g1	fve:101297877	94.9	1.4e-292	-	serine hydroxymethyltransferase 7	K00600	glycine hydroxymethyltransferase	EC:2.1.2.1	fve00670	One carbon pool by folate	Metabolism	Metabolism of cofactors and vitamins
TRINITY_DN27239_c1_g3	atr:18423947	30.4	2.4e-15	-	pectinesterase	K01051	pectinesterase	EC:3.1.1.11	atr00040	Pentose and glucuronate interconversions	Metabolism	Carbohydrate metabolism
TRINITY_DN27239_c1_g3	atr:18423947	30.4	2.4e-15	-	pectinesterase	K01051	pectinesterase	EC:3.1.1.11	atr00500	Starch and sucrose metabolism	Metabolism	Carbohydrate metabolism
TRINITY_DN27239_c1_g4	vvi:100241225	80.4	2.3e-262	-	serine hydroxymethyltransferase 7-like	K00600	glycine hydroxymethyltransferase	EC:2.1.2.1	vvi01200	Carbon metabolism	Metabolism	Overview
TRINITY_DN27239_c1_g4	vvi:100241225	80.4	2.3e-262	-	serine hydroxymethyltransferase 7-like	K00600	glycine hydroxymethyltransferase	EC:2.1.2.1	vvi01230	Biosynthesis of amino acids	Metabolism	Overview
TRINITY_DN27239_c1_g4	vvi:100241225	80.4	2.3e-262	-	serine hydroxymethyltransferase 7-like	K00600	glycine hydroxymethyltransferase	EC:2.1.2.1	vvi00630	Glyoxylate and dicarboxylate metabolism	Metabolism	Carbohydrate metabolism
TRINITY_DN27239_c1_g4	vvi:100241225	80.4	2.3e-262	-	serine hydroxymethyltransferase 7-like	K00600	glycine hydroxymethyltransferase	EC:2.1.2.1	vvi00260	Glycine, serine and threonine metabolism	Metabolism	Amino acid metabolism
TRINITY_DN27239_c1_g4	vvi:100241225	80.4	2.3e-262	-	serine hydroxymethyltransferase 7-like	K00600	glycine hydroxymethyltransferase	EC:2.1.2.1	vvi00460	Cyanoamino acid metabolism	Metabolism	Metabolism of other amino acids
TRINITY_DN27239_c1_g4	vvi:100241225	80.4	2.3e-262	-	serine hydroxymethyltransferase 7-like	K00600	glycine hydroxymethyltransferase	EC:2.1.2.1	vvi00670	One carbon pool by folate	Metabolism	Metabolism of cofactors and vitamins
TRINITY_DN27239_c1_g7	fve:101294778	92.6	5.5e-283	-	pectinesterase-like	K01051	pectinesterase	EC:3.1.1.11	fve00040	Pentose and glucuronate interconversions	Metabolism	Carbohydrate metabolism
TRINITY_DN27239_c1_g7	fve:101294778	92.6	5.5e-283	-	pectinesterase-like	K01051	pectinesterase	EC:3.1.1.11	fve00500	Starch and sucrose metabolism	Metabolism	Carbohydrate metabolism
TRINITY_DN27242_c1_g2	fve:101293064	96.5	0	-	sulfite reductase [ferredoxin]	K00392	sulfite reductase (ferredoxin)	EC:1.8.7.1	fve00920	Sulfur metabolism	Metabolism	Energy metabolism
TRINITY_DN27242_c1_g3	vvi:100245032	92.7	1.8e-37	-	sulfite reductase 1 [ferredoxin]	K00392	sulfite reductase (ferredoxin)	EC:1.8.7.1	vvi00920	Sulfur metabolism	Metabolism	Energy metabolism
TRINITY_DN27242_c1_g4	nnu:104585910	88.6	1.7e-252	-	sulfite reductase [ferredoxin]	K00392	sulfite reductase (ferredoxin)	EC:1.8.7.1	nnu00920	Sulfur metabolism	Metabolism	Energy metabolism
TRINITY_DN27242_c1_g5	nnu:104597396	95.8	2e-32	-	sulfite reductase [ferredoxin]	K00392	sulfite reductase (ferredoxin)	EC:1.8.7.1	nnu00920	Sulfur metabolism	Metabolism	Energy metabolism
TRINITY_DN27243_c0_g1	apro:F751_6748	51	7.6e-24	-	Peptidyl-tRNA hydrolase	K12900	FUS-interacting serine-arginine-rich protein 1	-	apro03040	Spliceosome	Genetic Information Processing	Transcription
TRINITY_DN27244_c0_g1	mdm:103410473	58.4	2e-25	-	G-type lectin S-receptor-like serine/threonine-protein kinase RKS1	K05349	beta-glucosidase	EC:3.2.1.21	mdm00500	Starch and sucrose metabolism	Metabolism	Carbohydrate metabolism
TRINITY_DN27244_c0_g1	mdm:103410473	58.4	2e-25	-	G-type lectin S-receptor-like serine/threonine-protein kinase RKS1	K05349	beta-glucosidase	EC:3.2.1.21	mdm00460	Cyanoamino acid metabolism	Metabolism	Metabolism of other amino acids
TRINITY_DN27244_c0_g1	mdm:103410473	58.4	2e-25	-	G-type lectin S-receptor-like serine/threonine-protein kinase RKS1	K05349	beta-glucosidase	EC:3.2.1.21	mdm00940	Phenylpropanoid biosynthesis	Metabolism	Biosynthesis of other secondary metabolites
TRINITY_DN27244_c0_g2	gra:105765866	42.2	7.9e-29	-	cysteine-rich receptor-like protein kinase 19	K01183	chitinase	EC:3.2.1.14	gra00520	Amino sugar and nucleotide sugar metabolism	Metabolism	Carbohydrate metabolism
TRINITY_DN27245_c0_g1	pop:POPTR_0016s11050g	38.6	4.5e-20	-	hypothetical protein	K14510	serine/threonine-protein kinase CTR1	EC:2.7.11.1	pop04075	Plant hormone signal transduction	Environmental Information Processing	Signal transduction
TRINITY_DN27246_c0_g1	mtr:MTR_5g034040	62.7	3e-15	-	DNA-directed RNA polymerase II 8.2 kDa protein	K03007	DNA-directed RNA polymerases I, II, and III subunit RPABC5	-	mtr00230	Purine metabolism	Metabolism	Nucleotide metabolism
TRINITY_DN27246_c0_g1	mtr:MTR_5g034040	62.7	3e-15	-	DNA-directed RNA polymerase II 8.2 kDa protein	K03007	DNA-directed RNA polymerases I, II, and III subunit RPABC5	-	mtr00240	Pyrimidine metabolism	Metabolism	Nucleotide metabolism
TRINITY_DN27246_c0_g1	mtr:MTR_5g034040	62.7	3e-15	-	DNA-directed RNA polymerase II 8.2 kDa protein	K03007	DNA-directed RNA polymerases I, II, and III subunit RPABC5	-	mtr03020	RNA polymerase	Genetic Information Processing	Transcription
TRINITY_DN27248_c0_g1	fve:101295713	87.7	0	-	peroxisomal acyl-coenzyme A oxidase 1	K00232	acyl-CoA oxidase	EC:1.3.3.6	fve01212	Fatty acid metabolism	Metabolism	Overview
TRINITY_DN27248_c0_g1	fve:101295713	87.7	0	-	peroxisomal acyl-coenzyme A oxidase 1	K00232	acyl-CoA oxidase	EC:1.3.3.6	fve00071	Fatty acid degradation	Metabolism	Lipid metabolism
TRINITY_DN27248_c0_g1	fve:101295713	87.7	0	-	peroxisomal acyl-coenzyme A oxidase 1	K00232	acyl-CoA oxidase	EC:1.3.3.6	fve00592	alpha-Linolenic acid metabolism	Metabolism	Lipid metabolism
TRINITY_DN27248_c0_g1	fve:101295713	87.7	0	-	peroxisomal acyl-coenzyme A oxidase 1	K00232	acyl-CoA oxidase	EC:1.3.3.6	fve01040	Biosynthesis of unsaturated fatty acids	Metabolism	Lipid metabolism
TRINITY_DN27248_c0_g1	fve:101295713	87.7	0	-	peroxisomal acyl-coenzyme A oxidase 1	K00232	acyl-CoA oxidase	EC:1.3.3.6	fve04146	Peroxisome	Cellular Processes	Transport and catabolism
TRINITY_DN27248_c0_g2	pmum:103339462	83.9	6.5e-292	-	peroxisomal acyl-coenzyme A oxidase 1-like	K00232	acyl-CoA oxidase	EC:1.3.3.6	pmum01212	Fatty acid metabolism	Metabolism	Overview
TRINITY_DN27248_c0_g2	pmum:103339462	83.9	6.5e-292	-	peroxisomal acyl-coenzyme A oxidase 1-like	K00232	acyl-CoA oxidase	EC:1.3.3.6	pmum00071	Fatty acid degradation	Metabolism	Lipid metabolism
TRINITY_DN27248_c0_g2	pmum:103339462	83.9	6.5e-292	-	peroxisomal acyl-coenzyme A oxidase 1-like	K00232	acyl-CoA oxidase	EC:1.3.3.6	pmum00592	alpha-Linolenic acid metabolism	Metabolism	Lipid metabolism
TRINITY_DN27248_c0_g2	pmum:103339462	83.9	6.5e-292	-	peroxisomal acyl-coenzyme A oxidase 1-like	K00232	acyl-CoA oxidase	EC:1.3.3.6	pmum01040	Biosynthesis of unsaturated fatty acids	Metabolism	Lipid metabolism
TRINITY_DN27248_c0_g2	pmum:103339462	83.9	6.5e-292	-	peroxisomal acyl-coenzyme A oxidase 1-like	K00232	acyl-CoA oxidase	EC:1.3.3.6	pmum04146	Peroxisome	Cellular Processes	Transport and catabolism
TRINITY_DN27251_c1_g1	sita:101754403	37.5	4e-07	-	E3 ubiquitin-protein ligase RMA1H1-like	K10666	E3 ubiquitin-protein ligase RNF5	EC:2.3.2.27	sita04141	Protein processing in endoplasmic reticulum	Genetic Information Processing	Folding, sorting and degradation
TRINITY_DN27251_c1_g6	jcu:105633892	43	5.2e-57	-	pentatricopeptide repeat-containing protein At2g04860	K01176	alpha-amylase	EC:3.2.1.1	jcu00500	Starch and sucrose metabolism	Metabolism	Carbohydrate metabolism
TRINITY_DN27252_c0_g1	fve:101300649	94.1	2.6e-203	-	S-adenosylmethionine decarboxylase proenzyme-like	K01611	S-adenosylmethionine decarboxylase	EC:4.1.1.50	fve00270	Cysteine and methionine metabolism	Metabolism	Amino acid metabolism
TRINITY_DN27252_c0_g1	fve:101300649	94.1	2.6e-203	-	S-adenosylmethionine decarboxylase proenzyme-like	K01611	S-adenosylmethionine decarboxylase	EC:4.1.1.50	fve00330	Arginine and proline metabolism	Metabolism	Amino acid metabolism
TRINITY_DN27252_c1_g1	fve:101303120	82.7	4.9e-20	-	cytochrome P450 CYP749A22-like	K15639	PHYB activation tagged suppressor 1	EC:1.14.-.-	fve00905	Brassinosteroid biosynthesis	Metabolism	Metabolism of terpenoids and polyketides
TRINITY_DN27253_c0_g1	fve:101310180	89.6	3.2e-216	-	cysteine protease ATG4-like	K08342	cysteine protease ATG4	EC:3.4.22.-	fve04140	Regulation of autophagy	Cellular Processes	Transport and catabolism
TRINITY_DN27257_c0_g1	atr:18426343	78.4	2.4e-179	-	shaggy-related protein kinase zeta	K14502	protein brassinosteroid insensitive 2	EC:2.7.11.1	atr04075	Plant hormone signal transduction	Environmental Information Processing	Signal transduction
TRINITY_DN27257_c0_g2	atr:18426343	75.9	1.3e-176	-	shaggy-related protein kinase zeta	K14502	protein brassinosteroid insensitive 2	EC:2.7.11.1	atr04075	Plant hormone signal transduction	Environmental Information Processing	Signal transduction
TRINITY_DN27258_c0_g1	fve:101303741	90.3	7.5e-251	-	inositol-3-phosphate synthase	K01858	myo-inositol-1-phosphate synthase	EC:5.5.1.4	fve00562	Inositol phosphate metabolism	Metabolism	Carbohydrate metabolism
TRINITY_DN27258_c0_g6	fve:101312651	91.1	8.3e-247	-	mannan endo-1	K19355	mannan endo-1,4-beta-mannosidase	EC:3.2.1.78	fve00051	Fructose and mannose metabolism	Metabolism	Carbohydrate metabolism
TRINITY_DN27259_c1_g2	pda:103702716	36.1	9.1e-76	-	cytochrome P450 90B1-like	K09587	steroid 22-alpha-hydroxylase	EC:1.14.13.-	pda00905	Brassinosteroid biosynthesis	Metabolism	Metabolism of terpenoids and polyketides
TRINITY_DN27259_c1_g6	sot:102582586	36.4	2e-61	-	UDP-glycosyltransferase 79B8-like	K17193	anthocyanidin 3-O-glucoside 2'''-O-xylosyltransferase	EC:2.4.2.51	sot00942	Anthocyanin biosynthesis	Metabolism	Biosynthesis of other secondary metabolites
TRINITY_DN27259_c1_g8	vvi:100267863	33.3	6.1e-45	-	cytochrome P450 84A1	K09755	ferulate-5-hydroxylase	EC:1.14.-.-	vvi00940	Phenylpropanoid biosynthesis	Metabolism	Biosynthesis of other secondary metabolites
TRINITY_DN27262_c0_g10	sind:105178669	83.3	1.6e-08	-	ATP-dependent RNA helicase DHX36	K14442	ATP-dependent RNA helicase DHX36	EC:3.6.4.13	sind03018	RNA degradation	Genetic Information Processing	Folding, sorting and degradation
TRINITY_DN27262_c0_g11	nnu:104586525	51.4	1.1e-21	-	ATP-dependent RNA helicase DHX36-like	K14442	ATP-dependent RNA helicase DHX36	EC:3.6.4.13	nnu03018	RNA degradation	Genetic Information Processing	Folding, sorting and degradation
TRINITY_DN27262_c0_g4	apro:F751_3805	54.5	8.9e-29	-	ADP-ribosylation factor GTPase-activating protein AGD7	K12492	ADP-ribosylation factor GTPase-activating protein 1	-	apro04144	Endocytosis	Cellular Processes	Transport and catabolism
TRINITY_DN27262_c0_g5	nnu:104586525	48.4	6.2e-13	-	ATP-dependent RNA helicase DHX36-like	K14442	ATP-dependent RNA helicase DHX36	EC:3.6.4.13	nnu03018	RNA degradation	Genetic Information Processing	Folding, sorting and degradation
TRINITY_DN27262_c0_g6	nnu:104586525	63.7	1.5e-25	-	ATP-dependent RNA helicase DHX36-like	K14442	ATP-dependent RNA helicase DHX36	EC:3.6.4.13	nnu03018	RNA degradation	Genetic Information Processing	Folding, sorting and degradation
TRINITY_DN27262_c0_g9	sly:101247633	85.7	1.4e-30	-	ATP-dependent RNA helicase DHX36	K14442	ATP-dependent RNA helicase DHX36	EC:3.6.4.13	sly03018	RNA degradation	Genetic Information Processing	Folding, sorting and degradation
TRINITY_DN27264_c1_g1	fve:101300686	91.3	3.8e-129	-	DNA repair protein XRCC4	K10886	DNA-repair protein XRCC4	-	fve03450	Non-homologous end-joining	Genetic Information Processing	Replication and repair
TRINITY_DN27264_c1_g3	fve:101294270	100	2.2e-10	-	gibberellin 2-beta-dioxygenase 1-like	K04125	gibberellin 2-oxidase	EC:1.14.11.13	fve00904	Diterpenoid biosynthesis	Metabolism	Metabolism of terpenoids and polyketides
TRINITY_DN27264_c1_g8	fve:101294270	96.1	3.7e-189	-	gibberellin 2-beta-dioxygenase 1-like	K04125	gibberellin 2-oxidase	EC:1.14.11.13	fve00904	Diterpenoid biosynthesis	Metabolism	Metabolism of terpenoids and polyketides
TRINITY_DN27265_c0_g1	pda:103720410	92.7	4.4e-77	-	uroporphyrinogen decarboxylase-like	K01599	uroporphyrinogen decarboxylase	EC:4.1.1.37	pda00860	Porphyrin and chlorophyll metabolism	Metabolism	Metabolism of cofactors and vitamins
TRINITY_DN27265_c0_g2	pvu:PHAVU_001G248800g	100	1.7e-66	-	hypothetical protein	K01599	uroporphyrinogen decarboxylase	EC:4.1.1.37	pvu00860	Porphyrin and chlorophyll metabolism	Metabolism	Metabolism of cofactors and vitamins
TRINITY_DN27265_c0_g3	fve:101299710	87	4.5e-211	-	uroporphyrinogen decarboxylase	K01599	uroporphyrinogen decarboxylase	EC:4.1.1.37	fve00860	Porphyrin and chlorophyll metabolism	Metabolism	Metabolism of cofactors and vitamins
TRINITY_DN27265_c0_g4	pop:POPTR_0019s07540g	90.2	1.1e-41	POPTRDRAFT_826111	Uroporphyrinogen decarboxylase family protein	K01599	uroporphyrinogen decarboxylase	EC:4.1.1.37	pop00860	Porphyrin and chlorophyll metabolism	Metabolism	Metabolism of cofactors and vitamins
TRINITY_DN27267_c0_g1	ppp:PHYPADRAFT_165263	74	1e-25	-	hypothetical protein	K03010	DNA-directed RNA polymerase II subunit RPB2	EC:2.7.7.6	ppp00230	Purine metabolism	Metabolism	Nucleotide metabolism
TRINITY_DN27267_c0_g1	ppp:PHYPADRAFT_165263	74	1e-25	-	hypothetical protein	K03010	DNA-directed RNA polymerase II subunit RPB2	EC:2.7.7.6	ppp00240	Pyrimidine metabolism	Metabolism	Nucleotide metabolism
TRINITY_DN27267_c0_g1	ppp:PHYPADRAFT_165263	74	1e-25	-	hypothetical protein	K03010	DNA-directed RNA polymerase II subunit RPB2	EC:2.7.7.6	ppp03020	RNA polymerase	Genetic Information Processing	Transcription
TRINITY_DN27267_c1_g1	vvi:100252267	98.9	1.9e-203	-	DNA-directed RNA polymerase II subunit RPB2-like	K03010	DNA-directed RNA polymerase II subunit RPB2	EC:2.7.7.6	vvi00230	Purine metabolism	Metabolism	Nucleotide metabolism
TRINITY_DN27267_c1_g1	vvi:100252267	98.9	1.9e-203	-	DNA-directed RNA polymerase II subunit RPB2-like	K03010	DNA-directed RNA polymerase II subunit RPB2	EC:2.7.7.6	vvi00240	Pyrimidine metabolism	Metabolism	Nucleotide metabolism
TRINITY_DN27267_c1_g1	vvi:100252267	98.9	1.9e-203	-	DNA-directed RNA polymerase II subunit RPB2-like	K03010	DNA-directed RNA polymerase II subunit RPB2	EC:2.7.7.6	vvi03020	RNA polymerase	Genetic Information Processing	Transcription
TRINITY_DN27269_c0_g1	vvi:100245650	40.1	9.1e-147	-	cytochrome P450 CYP82D47-like	K17961	cytochrome P450, family 82, subfamily G, polypeptide 1	EC:1.14.-.-	vvi00904	Diterpenoid biosynthesis	Metabolism	Metabolism of terpenoids and polyketides
TRINITY_DN2726_c0_g1	pvu:PHAVU_009G121100g	100	5.4e-49	-	hypothetical protein	K02952	small subunit ribosomal protein S13	-	pvu03010	Ribosome	Genetic Information Processing	Translation
TRINITY_DN27270_c0_g6	fve:101311243	90.6	4.2e-168	-	very-long-chain 3-oxoacyl-CoA reductase 1-like	K10251	17beta-estradiol 17-dehydrogenase / very-long-chain 3-oxoacyl-CoA reductase	EC:1.1.1.62 1.1.1.330	fve01212	Fatty acid metabolism	Metabolism	Overview
TRINITY_DN27270_c0_g6	fve:101311243	90.6	4.2e-168	-	very-long-chain 3-oxoacyl-CoA reductase 1-like	K10251	17beta-estradiol 17-dehydrogenase / very-long-chain 3-oxoacyl-CoA reductase	EC:1.1.1.62 1.1.1.330	fve00062	Fatty acid elongation	Metabolism	Lipid metabolism
TRINITY_DN27270_c0_g6	fve:101311243	90.6	4.2e-168	-	very-long-chain 3-oxoacyl-CoA reductase 1-like	K10251	17beta-estradiol 17-dehydrogenase / very-long-chain 3-oxoacyl-CoA reductase	EC:1.1.1.62 1.1.1.330	fve01040	Biosynthesis of unsaturated fatty acids	Metabolism	Lipid metabolism
TRINITY_DN27270_c0_g8	nnu:104591581	84.7	6.1e-157	-	very-long-chain 3-oxoacyl-CoA reductase 1-like	K10251	17beta-estradiol 17-dehydrogenase / very-long-chain 3-oxoacyl-CoA reductase	EC:1.1.1.62 1.1.1.330	nnu01212	Fatty acid metabolism	Metabolism	Overview
TRINITY_DN27270_c0_g8	nnu:104591581	84.7	6.1e-157	-	very-long-chain 3-oxoacyl-CoA reductase 1-like	K10251	17beta-estradiol 17-dehydrogenase / very-long-chain 3-oxoacyl-CoA reductase	EC:1.1.1.62 1.1.1.330	nnu00062	Fatty acid elongation	Metabolism	Lipid metabolism
TRINITY_DN27270_c0_g8	nnu:104591581	84.7	6.1e-157	-	very-long-chain 3-oxoacyl-CoA reductase 1-like	K10251	17beta-estradiol 17-dehydrogenase / very-long-chain 3-oxoacyl-CoA reductase	EC:1.1.1.62 1.1.1.330	nnu01040	Biosynthesis of unsaturated fatty acids	Metabolism	Lipid metabolism
TRINITY_DN27272_c0_g1	fve:101294198	99	3.7e-49	-	60S ribosomal protein L7a-2	K02936	large subunit ribosomal protein L7Ae	-	fve03010	Ribosome	Genetic Information Processing	Translation
TRINITY_DN27272_c0_g10	eus:EUTSA_v10001451mg	96.3	5.8e-09	-	hypothetical protein	K08678	UDP-glucuronate decarboxylase	EC:4.1.1.35	eus00500	Starch and sucrose metabolism	Metabolism	Carbohydrate metabolism
TRINITY_DN27272_c0_g10	eus:EUTSA_v10001451mg	96.3	5.8e-09	-	hypothetical protein	K08678	UDP-glucuronate decarboxylase	EC:4.1.1.35	eus00520	Amino sugar and nucleotide sugar metabolism	Metabolism	Carbohydrate metabolism
TRINITY_DN27272_c0_g2	fve:101308244	97.3	4.5e-146	-	UDP-glucuronic acid decarboxylase 2	K08678	UDP-glucuronate decarboxylase	EC:4.1.1.35	fve00500	Starch and sucrose metabolism	Metabolism	Carbohydrate metabolism
TRINITY_DN27272_c0_g2	fve:101308244	97.3	4.5e-146	-	UDP-glucuronic acid decarboxylase 2	K08678	UDP-glucuronate decarboxylase	EC:4.1.1.35	fve00520	Amino sugar and nucleotide sugar metabolism	Metabolism	Carbohydrate metabolism
TRINITY_DN27272_c0_g4	nnu:104599892	96.1	1.7e-135	-	60S ribosomal protein L7a	K02936	large subunit ribosomal protein L7Ae	-	nnu03010	Ribosome	Genetic Information Processing	Translation
TRINITY_DN27272_c0_g7	fve:101314198	97.1	6.6e-36	-	alpha-1	K13379	reversibly glycosylated polypeptide / UDP-arabinopyranose mutase	EC:2.4.1.- 5.4.99.30	fve00520	Amino sugar and nucleotide sugar metabolism	Metabolism	Carbohydrate metabolism
TRINITY_DN27272_c0_g8	fve:101306629	98	5.5e-151	-	alpha-1	K13379	reversibly glycosylated polypeptide / UDP-arabinopyranose mutase	EC:2.4.1.- 5.4.99.30	fve00520	Amino sugar and nucleotide sugar metabolism	Metabolism	Carbohydrate metabolism
TRINITY_DN27272_c0_g9	gra:105788061	93.4	4.7e-179	-	alpha-1	K13379	reversibly glycosylated polypeptide / UDP-arabinopyranose mutase	EC:2.4.1.- 5.4.99.30	gra00520	Amino sugar and nucleotide sugar metabolism	Metabolism	Carbohydrate metabolism
TRINITY_DN27273_c0_g1	fve:101312254	90.2	4.8e-206	-	phosphatidylinositol 4-phosphate 5-kinase 8	K00889	1-phosphatidylinositol-4-phosphate 5-kinase	EC:2.7.1.68	fve00562	Inositol phosphate metabolism	Metabolism	Carbohydrate metabolism
TRINITY_DN27273_c0_g1	fve:101312254	90.2	4.8e-206	-	phosphatidylinositol 4-phosphate 5-kinase 8	K00889	1-phosphatidylinositol-4-phosphate 5-kinase	EC:2.7.1.68	fve04070	Phosphatidylinositol signaling system	Environmental Information Processing	Signal transduction
TRINITY_DN27273_c0_g1	fve:101312254	90.2	4.8e-206	-	phosphatidylinositol 4-phosphate 5-kinase 8	K00889	1-phosphatidylinositol-4-phosphate 5-kinase	EC:2.7.1.68	fve04144	Endocytosis	Cellular Processes	Transport and catabolism
TRINITY_DN27273_c0_g2	fve:101305091	95.1	0	-	phosphatidylinositol 4-phosphate 5-kinase 9	K00889	1-phosphatidylinositol-4-phosphate 5-kinase	EC:2.7.1.68	fve00562	Inositol phosphate metabolism	Metabolism	Carbohydrate metabolism
TRINITY_DN27273_c0_g2	fve:101305091	95.1	0	-	phosphatidylinositol 4-phosphate 5-kinase 9	K00889	1-phosphatidylinositol-4-phosphate 5-kinase	EC:2.7.1.68	fve04070	Phosphatidylinositol signaling system	Environmental Information Processing	Signal transduction
TRINITY_DN27273_c0_g2	fve:101305091	95.1	0	-	phosphatidylinositol 4-phosphate 5-kinase 9	K00889	1-phosphatidylinositol-4-phosphate 5-kinase	EC:2.7.1.68	fve04144	Endocytosis	Cellular Processes	Transport and catabolism
TRINITY_DN27273_c0_g3	egu:105059076	83	7.3e-66	-	phosphatidylinositol 4-phosphate 5-kinase 9	K00889	1-phosphatidylinositol-4-phosphate 5-kinase	EC:2.7.1.68	egu00562	Inositol phosphate metabolism	Metabolism	Carbohydrate metabolism
TRINITY_DN27273_c0_g3	egu:105059076	83	7.3e-66	-	phosphatidylinositol 4-phosphate 5-kinase 9	K00889	1-phosphatidylinositol-4-phosphate 5-kinase	EC:2.7.1.68	egu04070	Phosphatidylinositol signaling system	Environmental Information Processing	Signal transduction
TRINITY_DN27273_c0_g3	egu:105059076	83	7.3e-66	-	phosphatidylinositol 4-phosphate 5-kinase 9	K00889	1-phosphatidylinositol-4-phosphate 5-kinase	EC:2.7.1.68	egu04144	Endocytosis	Cellular Processes	Transport and catabolism
TRINITY_DN27273_c0_g4	bdi:100846412	95.3	4.9e-69	-	phosphatidylinositol 4-phosphate 5-kinase 9-like	K00889	1-phosphatidylinositol-4-phosphate 5-kinase	EC:2.7.1.68	bdi00562	Inositol phosphate metabolism	Metabolism	Carbohydrate metabolism
TRINITY_DN27273_c0_g4	bdi:100846412	95.3	4.9e-69	-	phosphatidylinositol 4-phosphate 5-kinase 9-like	K00889	1-phosphatidylinositol-4-phosphate 5-kinase	EC:2.7.1.68	bdi04070	Phosphatidylinositol signaling system	Environmental Information Processing	Signal transduction
TRINITY_DN27273_c0_g4	bdi:100846412	95.3	4.9e-69	-	phosphatidylinositol 4-phosphate 5-kinase 9-like	K00889	1-phosphatidylinositol-4-phosphate 5-kinase	EC:2.7.1.68	bdi04144	Endocytosis	Cellular Processes	Transport and catabolism
TRINITY_DN27274_c0_g1	zma:100383789	43.8	4.5e-12	CA2P7	nuclear transcription factor Y subunit A-3	K01883	cysteinyl-tRNA synthetase	EC:6.1.1.16	zma00970	Aminoacyl-tRNA biosynthesis	Genetic Information Processing	Translation
TRINITY_DN27277_c0_g1	tcc:TCM_005697	41.4	7.9e-54	-	Pentatricopeptide repeat superfamily protein isoform 1	K01074	palmitoyl-protein thioesterase	EC:3.1.2.22	tcc01212	Fatty acid metabolism	Metabolism	Overview
TRINITY_DN27277_c0_g1	tcc:TCM_005697	41.4	7.9e-54	-	Pentatricopeptide repeat superfamily protein isoform 1	K01074	palmitoyl-protein thioesterase	EC:3.1.2.22	tcc00062	Fatty acid elongation	Metabolism	Lipid metabolism
TRINITY_DN27277_c0_g2	tcc:TCM_005697	46.2	8.2e-24	-	Pentatricopeptide repeat superfamily protein isoform 1	K01074	palmitoyl-protein thioesterase	EC:3.1.2.22	tcc01212	Fatty acid metabolism	Metabolism	Overview
TRINITY_DN27277_c0_g2	tcc:TCM_005697	46.2	8.2e-24	-	Pentatricopeptide repeat superfamily protein isoform 1	K01074	palmitoyl-protein thioesterase	EC:3.1.2.22	tcc00062	Fatty acid elongation	Metabolism	Lipid metabolism
TRINITY_DN27277_c0_g3	jcu:105633892	47.1	4e-11	-	pentatricopeptide repeat-containing protein At2g04860	K01176	alpha-amylase	EC:3.2.1.1	jcu00500	Starch and sucrose metabolism	Metabolism	Carbohydrate metabolism
TRINITY_DN27278_c0_g2	pvu:PHAVU_004G014800g	100	8.8e-42	-	hypothetical protein	K00122	formate dehydrogenase	EC:1.2.1.2	pvu01200	Carbon metabolism	Metabolism	Overview
TRINITY_DN27278_c0_g2	pvu:PHAVU_004G014800g	100	8.8e-42	-	hypothetical protein	K00122	formate dehydrogenase	EC:1.2.1.2	pvu00630	Glyoxylate and dicarboxylate metabolism	Metabolism	Carbohydrate metabolism
TRINITY_DN27278_c0_g5	fve:101292916	95.6	8.8e-215	-	formate dehydrogenase	K00122	formate dehydrogenase	EC:1.2.1.2	fve01200	Carbon metabolism	Metabolism	Overview
TRINITY_DN27278_c0_g5	fve:101292916	95.6	8.8e-215	-	formate dehydrogenase	K00122	formate dehydrogenase	EC:1.2.1.2	fve00630	Glyoxylate and dicarboxylate metabolism	Metabolism	Carbohydrate metabolism
TRINITY_DN27278_c0_g6	fve:101306124	83.1	2.8e-104	-	shikimate O-hydroxycinnamoyltransferase-like	K13065	shikimate O-hydroxycinnamoyltransferase	EC:2.3.1.133	fve00940	Phenylpropanoid biosynthesis	Metabolism	Biosynthesis of other secondary metabolites
TRINITY_DN27278_c0_g6	fve:101306124	83.1	2.8e-104	-	shikimate O-hydroxycinnamoyltransferase-like	K13065	shikimate O-hydroxycinnamoyltransferase	EC:2.3.1.133	fve00945	Stilbenoid, diarylheptanoid and gingerol biosynthesis	Metabolism	Biosynthesis of other secondary metabolites
TRINITY_DN27278_c0_g6	fve:101306124	83.1	2.8e-104	-	shikimate O-hydroxycinnamoyltransferase-like	K13065	shikimate O-hydroxycinnamoyltransferase	EC:2.3.1.133	fve00941	Flavonoid biosynthesis	Metabolism	Biosynthesis of other secondary metabolites
TRINITY_DN27278_c0_g7	pvu:PHAVU_004G014800g	100	8.2e-63	-	hypothetical protein	K00122	formate dehydrogenase	EC:1.2.1.2	pvu01200	Carbon metabolism	Metabolism	Overview
TRINITY_DN27278_c0_g7	pvu:PHAVU_004G014800g	100	8.2e-63	-	hypothetical protein	K00122	formate dehydrogenase	EC:1.2.1.2	pvu00630	Glyoxylate and dicarboxylate metabolism	Metabolism	Carbohydrate metabolism
TRINITY_DN27279_c0_g1	fve:101305956	91	1.3e-287	-	glutathione synthetase	K01920	glutathione synthase	EC:6.3.2.3	fve00270	Cysteine and methionine metabolism	Metabolism	Amino acid metabolism
TRINITY_DN27279_c0_g1	fve:101305956	91	1.3e-287	-	glutathione synthetase	K01920	glutathione synthase	EC:6.3.2.3	fve00480	Glutathione metabolism	Metabolism	Metabolism of other amino acids
TRINITY_DN27280_c0_g2	brp:103839795	37.1	7.6e-18	-	uncharacterized LOC103839795	K12813	pre-mRNA-splicing factor ATP-dependent RNA helicase DHX16	EC:3.6.4.13	brp03040	Spliceosome	Genetic Information Processing	Transcription
TRINITY_DN27282_c0_g1	fve:101300606	95.1	2.8e-188	-	fructose-bisphosphate aldolase	K01623	fructose-bisphosphate aldolase, class I	EC:4.1.2.13	fve01200	Carbon metabolism	Metabolism	Overview
TRINITY_DN27282_c0_g1	fve:101300606	95.1	2.8e-188	-	fructose-bisphosphate aldolase	K01623	fructose-bisphosphate aldolase, class I	EC:4.1.2.13	fve01230	Biosynthesis of amino acids	Metabolism	Overview
TRINITY_DN27282_c0_g1	fve:101300606	95.1	2.8e-188	-	fructose-bisphosphate aldolase	K01623	fructose-bisphosphate aldolase, class I	EC:4.1.2.13	fve00010	Glycolysis / Gluconeogenesis	Metabolism	Carbohydrate metabolism
TRINITY_DN27282_c0_g1	fve:101300606	95.1	2.8e-188	-	fructose-bisphosphate aldolase	K01623	fructose-bisphosphate aldolase, class I	EC:4.1.2.13	fve00030	Pentose phosphate pathway	Metabolism	Carbohydrate metabolism
TRINITY_DN27282_c0_g1	fve:101300606	95.1	2.8e-188	-	fructose-bisphosphate aldolase	K01623	fructose-bisphosphate aldolase, class I	EC:4.1.2.13	fve00051	Fructose and mannose metabolism	Metabolism	Carbohydrate metabolism
TRINITY_DN27282_c0_g1	fve:101300606	95.1	2.8e-188	-	fructose-bisphosphate aldolase	K01623	fructose-bisphosphate aldolase, class I	EC:4.1.2.13	fve00710	Carbon fixation in photosynthetic organisms	Metabolism	Energy metabolism
TRINITY_DN27283_c1_g2	csv:101217606	52.9	3e-14	XTH6	xyloglucan endotransglucosylase/hydrolase protein 22	K14504	xyloglucan:xyloglucosyl transferase TCH4	EC:2.4.1.207	csv04075	Plant hormone signal transduction	Environmental Information Processing	Signal transduction
TRINITY_DN27284_c0_g2	bna:106417071	73.7	1.6e-09	-	probable low-specificity L-threonine aldolase 1	K01620	threonine aldolase	EC:4.1.2.48	bna01230	Biosynthesis of amino acids	Metabolism	Overview
TRINITY_DN27284_c0_g2	bna:106417071	73.7	1.6e-09	-	probable low-specificity L-threonine aldolase 1	K01620	threonine aldolase	EC:4.1.2.48	bna00260	Glycine, serine and threonine metabolism	Metabolism	Amino acid metabolism
TRINITY_DN27284_c0_g4	pmum:103335303	90.4	1e-128	-	ATP synthase subunit a	K02126	F-type H+-transporting ATPase subunit a	-	pmum00190	Oxidative phosphorylation	Metabolism	Energy metabolism
TRINITY_DN27286_c0_g1	fve:101302870	97.4	0	-	splicing factor 3B subunit 3-like	K12830	splicing factor 3B subunit 3	-	fve03040	Spliceosome	Genetic Information Processing	Transcription
TRINITY_DN27287_c0_g1	fve:101302655	80.4	3.3e-159	-	protein EDS1B-like	K18875	enhanced disease susceptibility 1 protein	-	fve04626	Plant-pathogen interaction	Organismal Systems	Environmental adaptation
TRINITY_DN27287_c0_g2	fve:101291642	97.3	9.6e-210	-	carbon catabolite repressor protein 4 homolog 1	K12603	CCR4-NOT transcription complex subunit 6	EC:3.1.13.4	fve03018	RNA degradation	Genetic Information Processing	Folding, sorting and degradation
TRINITY_DN27287_c0_g5	pda:103712065	95.5	3.5e-34	-	carbon catabolite repressor protein 4 homolog 1-like	K12603	CCR4-NOT transcription complex subunit 6	EC:3.1.13.4	pda03018	RNA degradation	Genetic Information Processing	Folding, sorting and degradation
TRINITY_DN27288_c3_g3	mdm:103448456	55.1	2.1e-07	-	ent-copalyl diphosphate synthase	K04120	ent-copalyl diphosphate synthase	EC:5.5.1.13	mdm00904	Diterpenoid biosynthesis	Metabolism	Metabolism of terpenoids and polyketides
TRINITY_DN27289_c0_g2	fve:101310945	82.9	6.4e-68	-	PXMP2/4 family protein 4-like	K13348	protein Mpv17	-	fve04146	Peroxisome	Cellular Processes	Transport and catabolism
TRINITY_DN27290_c2_g2	fve:101293201	94.4	0	-	putative pre-mRNA-splicing factor ATP-dependent RNA helicase DHX16	K12813	pre-mRNA-splicing factor ATP-dependent RNA helicase DHX16	EC:3.6.4.13	fve03040	Spliceosome	Genetic Information Processing	Transcription
TRINITY_DN27290_c2_g4	fve:101306750	60.5	1.4e-184	-	putative pre-mRNA-splicing factor ATP-dependent RNA helicase DHX16	K12813	pre-mRNA-splicing factor ATP-dependent RNA helicase DHX16	EC:3.6.4.13	fve03040	Spliceosome	Genetic Information Processing	Transcription
TRINITY_DN27290_c2_g5	nnu:104602741	91.9	1.3e-190	-	NADH dehydrogenase [ubiquinone] 1 alpha subcomplex subunit 9	K03953	NADH dehydrogenase (ubiquinone) 1 alpha subcomplex subunit 9	-	nnu00190	Oxidative phosphorylation	Metabolism	Energy metabolism
TRINITY_DN27291_c1_g1	fve:101304749	48.5	3e-28	-	very-long-chain (3R)-3-hydroxyacyl-CoA dehydratase 2	K10703	very-long-chain (3R)-3-hydroxyacyl-CoA dehydratase	EC:4.2.1.134	fve01212	Fatty acid metabolism	Metabolism	Overview
TRINITY_DN27291_c1_g1	fve:101304749	48.5	3e-28	-	very-long-chain (3R)-3-hydroxyacyl-CoA dehydratase 2	K10703	very-long-chain (3R)-3-hydroxyacyl-CoA dehydratase	EC:4.2.1.134	fve00062	Fatty acid elongation	Metabolism	Lipid metabolism
TRINITY_DN27291_c1_g1	fve:101304749	48.5	3e-28	-	very-long-chain (3R)-3-hydroxyacyl-CoA dehydratase 2	K10703	very-long-chain (3R)-3-hydroxyacyl-CoA dehydratase	EC:4.2.1.134	fve01040	Biosynthesis of unsaturated fatty acids	Metabolism	Lipid metabolism
TRINITY_DN27291_c1_g2	fve:101298436	95.7	7.7e-56	-	soluble inorganic pyrophosphatase 1	K01507	inorganic pyrophosphatase	EC:3.6.1.1	fve00190	Oxidative phosphorylation	Metabolism	Energy metabolism
TRINITY_DN27293_c0_g2	mis:MICPUN_60437	30.7	1.3e-09	-	E3 ubiquitin-protein ligase	K10615	E3 ubiquitin-protein ligase HERC4	EC:2.3.2.26	mis04120	Ubiquitin mediated proteolysis	Genetic Information Processing	Folding, sorting and degradation
TRINITY_DN27294_c1_g1	mtr:MTR_2g040370	36.8	7e-12	-	animal HSPA9 nucleotide-binding domain protein	K03283	heat shock 70kDa protein 1/8	-	mtr03040	Spliceosome	Genetic Information Processing	Transcription
TRINITY_DN27294_c1_g1	mtr:MTR_2g040370	36.8	7e-12	-	animal HSPA9 nucleotide-binding domain protein	K03283	heat shock 70kDa protein 1/8	-	mtr04141	Protein processing in endoplasmic reticulum	Genetic Information Processing	Folding, sorting and degradation
TRINITY_DN27294_c1_g1	mtr:MTR_2g040370	36.8	7e-12	-	animal HSPA9 nucleotide-binding domain protein	K03283	heat shock 70kDa protein 1/8	-	mtr04144	Endocytosis	Cellular Processes	Transport and catabolism
TRINITY_DN27296_c0_g1	ota:Ot08g00200	82.9	1.5e-08	-	putative L-ascorbate peroxidase (ISS)	K00434	L-ascorbate peroxidase	EC:1.11.1.11	ota00053	Ascorbate and aldarate metabolism	Metabolism	Carbohydrate metabolism
TRINITY_DN27296_c0_g1	ota:Ot08g00200	82.9	1.5e-08	-	putative L-ascorbate peroxidase (ISS)	K00434	L-ascorbate peroxidase	EC:1.11.1.11	ota00480	Glutathione metabolism	Metabolism	Metabolism of other amino acids
TRINITY_DN27296_c0_g2	fve:101295172	93.8	3.5e-252	-	dolichyl-diphosphooligosaccharide--protein glycosyltransferase subunit 1B	K12666	oligosaccharyltransferase complex subunit alpha (ribophorin I)	-	fve00510	N-Glycan biosynthesis	Metabolism	Glycan biosynthesis and metabolism
TRINITY_DN27296_c0_g2	fve:101295172	93.8	3.5e-252	-	dolichyl-diphosphooligosaccharide--protein glycosyltransferase subunit 1B	K12666	oligosaccharyltransferase complex subunit alpha (ribophorin I)	-	fve04141	Protein processing in endoplasmic reticulum	Genetic Information Processing	Folding, sorting and degradation
TRINITY_DN27296_c0_g3	bna:106425271	45.8	4.5e-47	-	phosphatidylinositol-3-phosphatase myotubularin-2-like	K18081	myotubularin-related protein 1/2	EC:3.1.3.64 3.1.3.95	bna00562	Inositol phosphate metabolism	Metabolism	Carbohydrate metabolism
TRINITY_DN27296_c0_g3	bna:106425271	45.8	4.5e-47	-	phosphatidylinositol-3-phosphatase myotubularin-2-like	K18081	myotubularin-related protein 1/2	EC:3.1.3.64 3.1.3.95	bna04070	Phosphatidylinositol signaling system	Environmental Information Processing	Signal transduction
TRINITY_DN27296_c0_g5	ota:Ot08g00200	46.2	5e-15	-	putative L-ascorbate peroxidase (ISS)	K00434	L-ascorbate peroxidase	EC:1.11.1.11	ota00053	Ascorbate and aldarate metabolism	Metabolism	Carbohydrate metabolism
TRINITY_DN27296_c0_g5	ota:Ot08g00200	46.2	5e-15	-	putative L-ascorbate peroxidase (ISS)	K00434	L-ascorbate peroxidase	EC:1.11.1.11	ota00480	Glutathione metabolism	Metabolism	Metabolism of other amino acids
TRINITY_DN27296_c0_g6	crb:CARUB_v10000495mg	32.3	1.1e-31	-	hypothetical protein	K13414	mitogen-activated protein kinase kinase kinase 1, plant	EC:2.7.11.25	crb04626	Plant-pathogen interaction	Organismal Systems	Environmental adaptation
TRINITY_DN27296_c0_g7	fve:101301107	95.1	7.1e-237	-	dihydropyrimidine dehydrogenase [NADP(+)]	K00207	dihydropyrimidine dehydrogenase (NADP+)	EC:1.3.1.2	fve00240	Pyrimidine metabolism	Metabolism	Nucleotide metabolism
TRINITY_DN27296_c0_g7	fve:101301107	95.1	7.1e-237	-	dihydropyrimidine dehydrogenase [NADP(+)]	K00207	dihydropyrimidine dehydrogenase (NADP+)	EC:1.3.1.2	fve00410	beta-Alanine metabolism	Metabolism	Metabolism of other amino acids
TRINITY_DN27296_c0_g7	fve:101301107	95.1	7.1e-237	-	dihydropyrimidine dehydrogenase [NADP(+)]	K00207	dihydropyrimidine dehydrogenase (NADP+)	EC:1.3.1.2	fve00770	Pantothenate and CoA biosynthesis	Metabolism	Metabolism of cofactors and vitamins
TRINITY_DN27297_c0_g1	fve:101297987	91.9	4.2e-156	-	ribonuclease H2 subunit A	K10743	ribonuclease H2 subunit A	EC:3.1.26.4	fve03030	DNA replication	Genetic Information Processing	Replication and repair
TRINITY_DN27297_c0_g4	mpp:MICPUCDRAFT_29848	25.7	8.8e-26	-	hypothetical protein	K14536	ribosome assembly protein 1	EC:3.6.5.-	mpp03008	Ribosome biogenesis in eukaryotes	Genetic Information Processing	Translation
TRINITY_DN27297_c0_g5	pxb:103949362	88.2	1.4e-26	-	putative glucose-6-phosphate 1-epimerase	K01792	glucose-6-phosphate 1-epimerase	EC:5.1.3.15	pxb00010	Glycolysis / Gluconeogenesis	Metabolism	Carbohydrate metabolism
TRINITY_DN27297_c0_g6	gmx:3989294	87.2	3.9e-17	rps2	30S ribosomal protein S2	K02967	small subunit ribosomal protein S2	-	gmx03010	Ribosome	Genetic Information Processing	Translation
TRINITY_DN27297_c0_g7	fve:101310705	87.3	7.6e-122	-	5-formyltetrahydrofolate cyclo-ligase	K01934	5-formyltetrahydrofolate cyclo-ligase	EC:6.3.3.2	fve00670	One carbon pool by folate	Metabolism	Metabolism of cofactors and vitamins
TRINITY_DN27298_c0_g4	bna:106368734	38.1	3e-45	-	BRASSINOSTEROID INSENSITIVE 1-associated receptor kinase 1	K13416	brassinosteroid insensitive 1-associated receptor kinase 1	EC:2.7.10.1 2.7.11.1	bna04075	Plant hormone signal transduction	Environmental Information Processing	Signal transduction
TRINITY_DN27298_c0_g4	bna:106368734	38.1	3e-45	-	BRASSINOSTEROID INSENSITIVE 1-associated receptor kinase 1	K13416	brassinosteroid insensitive 1-associated receptor kinase 1	EC:2.7.10.1 2.7.11.1	bna04626	Plant-pathogen interaction	Organismal Systems	Environmental adaptation
TRINITY_DN27299_c0_g1	rcu:RCOM_1248100	97.4	7.3e-153	-	heat shock protein	K03283	heat shock 70kDa protein 1/8	-	rcu03040	Spliceosome	Genetic Information Processing	Transcription
TRINITY_DN27299_c0_g1	rcu:RCOM_1248100	97.4	7.3e-153	-	heat shock protein	K03283	heat shock 70kDa protein 1/8	-	rcu04141	Protein processing in endoplasmic reticulum	Genetic Information Processing	Folding, sorting and degradation
TRINITY_DN27299_c0_g1	rcu:RCOM_1248100	97.4	7.3e-153	-	heat shock protein	K03283	heat shock 70kDa protein 1/8	-	rcu04144	Endocytosis	Cellular Processes	Transport and catabolism
TRINITY_DN27299_c0_g2	fve:101311491	96.9	4.6e-104	-	probable mediator of RNA polymerase II transcription subunit 37e	K03283	heat shock 70kDa protein 1/8	-	fve03040	Spliceosome	Genetic Information Processing	Transcription
TRINITY_DN27299_c0_g2	fve:101311491	96.9	4.6e-104	-	probable mediator of RNA polymerase II transcription subunit 37e	K03283	heat shock 70kDa protein 1/8	-	fve04141	Protein processing in endoplasmic reticulum	Genetic Information Processing	Folding, sorting and degradation
TRINITY_DN27299_c0_g2	fve:101311491	96.9	4.6e-104	-	probable mediator of RNA polymerase II transcription subunit 37e	K03283	heat shock 70kDa protein 1/8	-	fve04144	Endocytosis	Cellular Processes	Transport and catabolism
TRINITY_DN27299_c1_g1	fve:101291093	97.8	1.4e-97	-	heat shock cognate 70 kDa protein 2	K03283	heat shock 70kDa protein 1/8	-	fve03040	Spliceosome	Genetic Information Processing	Transcription
TRINITY_DN27299_c1_g1	fve:101291093	97.8	1.4e-97	-	heat shock cognate 70 kDa protein 2	K03283	heat shock 70kDa protein 1/8	-	fve04141	Protein processing in endoplasmic reticulum	Genetic Information Processing	Folding, sorting and degradation
TRINITY_DN27299_c1_g1	fve:101291093	97.8	1.4e-97	-	heat shock cognate 70 kDa protein 2	K03283	heat shock 70kDa protein 1/8	-	fve04144	Endocytosis	Cellular Processes	Transport and catabolism
TRINITY_DN27299_c1_g2	fve:101305698	97.5	7.6e-86	-	probable mediator of RNA polymerase II transcription subunit 37c	K03283	heat shock 70kDa protein 1/8	-	fve03040	Spliceosome	Genetic Information Processing	Transcription
TRINITY_DN27299_c1_g2	fve:101305698	97.5	7.6e-86	-	probable mediator of RNA polymerase II transcription subunit 37c	K03283	heat shock 70kDa protein 1/8	-	fve04141	Protein processing in endoplasmic reticulum	Genetic Information Processing	Folding, sorting and degradation
TRINITY_DN27299_c1_g2	fve:101305698	97.5	7.6e-86	-	probable mediator of RNA polymerase II transcription subunit 37c	K03283	heat shock 70kDa protein 1/8	-	fve04144	Endocytosis	Cellular Processes	Transport and catabolism
TRINITY_DN27299_c1_g4	ath:AT5G02490	99	1.6e-51	-	heat shock protein 70	K03283	heat shock 70kDa protein 1/8	-	ath03040	Spliceosome	Genetic Information Processing	Transcription
TRINITY_DN27299_c1_g4	ath:AT5G02490	99	1.6e-51	-	heat shock protein 70	K03283	heat shock 70kDa protein 1/8	-	ath04141	Protein processing in endoplasmic reticulum	Genetic Information Processing	Folding, sorting and degradation
TRINITY_DN27299_c1_g4	ath:AT5G02490	99	1.6e-51	-	heat shock protein 70	K03283	heat shock 70kDa protein 1/8	-	ath04144	Endocytosis	Cellular Processes	Transport and catabolism
TRINITY_DN27300_c0_g2	bvg:104898700	88.5	4.8e-27	-	probable E3 ubiquitin-protein ligase LOG2	K10604	E3 ubiquitin-protein ligase MGRN1	EC:2.3.2.27	bvg04120	Ubiquitin mediated proteolysis	Genetic Information Processing	Folding, sorting and degradation
TRINITY_DN27300_c0_g4	tcc:TCM_022135	73	1.6e-07	-	RING/U-box superfamily protein isoform 1	K10604	E3 ubiquitin-protein ligase MGRN1	EC:2.3.2.27	tcc04120	Ubiquitin mediated proteolysis	Genetic Information Processing	Folding, sorting and degradation
TRINITY_DN27300_c1_g1	csl:COCSUDRAFT_65874	32.7	2.4e-50	-	hypothetical protein	K14544	U3 small nucleolar RNA-associated protein 22	-	csl03008	Ribosome biogenesis in eukaryotes	Genetic Information Processing	Translation
TRINITY_DN27303_c0_g1	mpp:MICPUCDRAFT_45363	25.7	2.7e-07	-	hypothetical protein	K02516	type II protein arginine methyltransferase	EC:2.1.1.320	mpp03013	RNA transport	Genetic Information Processing	Translation
TRINITY_DN27303_c0_g4	aly:ARALYDRAFT_354960	57.3	1.2e-19	-	hypothetical protein	K05283	phosphatidylinositol glycan, class W	EC:2.3.-.-	aly00563	Glycosylphosphatidylinositol(GPI)-anchor biosynthesis	Metabolism	Glycan biosynthesis and metabolism
TRINITY_DN27304_c1_g1	fve:101314946	95.2	1.6e-207	-	probable transaldolase	K00616	transaldolase	EC:2.2.1.2	fve01200	Carbon metabolism	Metabolism	Overview
TRINITY_DN27304_c1_g1	fve:101314946	95.2	1.6e-207	-	probable transaldolase	K00616	transaldolase	EC:2.2.1.2	fve01230	Biosynthesis of amino acids	Metabolism	Overview
TRINITY_DN27304_c1_g1	fve:101314946	95.2	1.6e-207	-	probable transaldolase	K00616	transaldolase	EC:2.2.1.2	fve00030	Pentose phosphate pathway	Metabolism	Carbohydrate metabolism
TRINITY_DN27304_c1_g2	pxb:103958275	40.1	1.8e-41	-	lysosomal alpha-mannosidase-like	K01191	alpha-mannosidase	EC:3.2.1.24	pxb00511	Other glycan degradation	Metabolism	Glycan biosynthesis and metabolism
TRINITY_DN27304_c1_g5	mus:103989923	84.9	2e-91	-	probable transaldolase	K00616	transaldolase	EC:2.2.1.2	mus01200	Carbon metabolism	Metabolism	Overview
TRINITY_DN27304_c1_g5	mus:103989923	84.9	2e-91	-	probable transaldolase	K00616	transaldolase	EC:2.2.1.2	mus01230	Biosynthesis of amino acids	Metabolism	Overview
TRINITY_DN27304_c1_g5	mus:103989923	84.9	2e-91	-	probable transaldolase	K00616	transaldolase	EC:2.2.1.2	mus00030	Pentose phosphate pathway	Metabolism	Carbohydrate metabolism
TRINITY_DN27304_c1_g7	nnu:104598575	78.8	9.5e-109	-	probable transaldolase	K00616	transaldolase	EC:2.2.1.2	nnu01200	Carbon metabolism	Metabolism	Overview
TRINITY_DN27304_c1_g7	nnu:104598575	78.8	9.5e-109	-	probable transaldolase	K00616	transaldolase	EC:2.2.1.2	nnu01230	Biosynthesis of amino acids	Metabolism	Overview
TRINITY_DN27304_c1_g7	nnu:104598575	78.8	9.5e-109	-	probable transaldolase	K00616	transaldolase	EC:2.2.1.2	nnu00030	Pentose phosphate pathway	Metabolism	Carbohydrate metabolism
TRINITY_DN27304_c1_g8	cit:102621482	80.9	2.6e-37	-	probable transaldolase-like	K00616	transaldolase	EC:2.2.1.2	cit01200	Carbon metabolism	Metabolism	Overview
TRINITY_DN27304_c1_g8	cit:102621482	80.9	2.6e-37	-	probable transaldolase-like	K00616	transaldolase	EC:2.2.1.2	cit01230	Biosynthesis of amino acids	Metabolism	Overview
TRINITY_DN27304_c1_g8	cit:102621482	80.9	2.6e-37	-	probable transaldolase-like	K00616	transaldolase	EC:2.2.1.2	cit00030	Pentose phosphate pathway	Metabolism	Carbohydrate metabolism
TRINITY_DN27305_c0_g5	fve:101304444	89.4	8.3e-254	-	abscisic acid 8'-hydroxylase 4-like	K09843	(+)-abscisic acid 8'-hydroxylase	EC:1.14.13.93	fve00906	Carotenoid biosynthesis	Metabolism	Metabolism of terpenoids and polyketides
TRINITY_DN27306_c0_g2	mus:103980779	61	6.3e-26	-	uncharacterized protein LOC103980779	K10532	heparan-alpha-glucosaminide N-acetyltransferase	EC:2.3.1.78	mus00531	Glycosaminoglycan degradation	Metabolism	Glycan biosynthesis and metabolism
TRINITY_DN27306_c0_g3	mus:103980779	61.8	6.1e-52	-	uncharacterized protein LOC103980779	K10532	heparan-alpha-glucosaminide N-acetyltransferase	EC:2.3.1.78	mus00531	Glycosaminoglycan degradation	Metabolism	Glycan biosynthesis and metabolism
TRINITY_DN27306_c0_g4	mus:103980779	65.6	3.1e-64	-	uncharacterized protein LOC103980779	K10532	heparan-alpha-glucosaminide N-acetyltransferase	EC:2.3.1.78	mus00531	Glycosaminoglycan degradation	Metabolism	Glycan biosynthesis and metabolism
TRINITY_DN27306_c0_g5	mus:103980779	66.1	5.4e-36	-	uncharacterized protein LOC103980779	K10532	heparan-alpha-glucosaminide N-acetyltransferase	EC:2.3.1.78	mus00531	Glycosaminoglycan degradation	Metabolism	Glycan biosynthesis and metabolism
TRINITY_DN27306_c0_g8	mus:103980779	60.9	8e-53	-	uncharacterized protein LOC103980779	K10532	heparan-alpha-glucosaminide N-acetyltransferase	EC:2.3.1.78	mus00531	Glycosaminoglycan degradation	Metabolism	Glycan biosynthesis and metabolism
TRINITY_DN27306_c0_g9	mdm:103414783	78.2	1e-16	-	serine/threonine protein phosphatase 2A 55 kDa regulatory subunit B beta isoform-like	K04354	serine/threonine-protein phosphatase 2A regulatory subunit B	-	mdm03015	mRNA surveillance pathway	Genetic Information Processing	Translation
TRINITY_DN27307_c0_g1	bdi:100823403	37.8	7.2e-15	-	5'-3' exoribonuclease 4-like	K12619	5'-3' exoribonuclease 2	EC:3.1.13.-	bdi03008	Ribosome biogenesis in eukaryotes	Genetic Information Processing	Translation
TRINITY_DN27307_c0_g1	bdi:100823403	37.8	7.2e-15	-	5'-3' exoribonuclease 4-like	K12619	5'-3' exoribonuclease 2	EC:3.1.13.-	bdi03018	RNA degradation	Genetic Information Processing	Folding, sorting and degradation
TRINITY_DN27308_c0_g1	mtr:MTR_7g058700	27.2	2.8e-31	-	tyrosine/DOPA decarboxylase	K01592	tyrosine decarboxylase	EC:4.1.1.25	mtr00350	Tyrosine metabolism	Metabolism	Amino acid metabolism
TRINITY_DN27308_c0_g1	mtr:MTR_7g058700	27.2	2.8e-31	-	tyrosine/DOPA decarboxylase	K01592	tyrosine decarboxylase	EC:4.1.1.25	mtr00950	Isoquinoline alkaloid biosynthesis	Metabolism	Biosynthesis of other secondary metabolites
TRINITY_DN27309_c0_g1	egr:104425678	39.4	8e-38	-	uncharacterized CRM domain-containing protein At3g25440	K01148	poly(A)-specific ribonuclease	EC:3.1.13.4	egr03018	RNA degradation	Genetic Information Processing	Folding, sorting and degradation
TRINITY_DN27311_c0_g2	fve:101293744	88.2	2e-10	-	ATP-dependent 6-phosphofructokinase 6	K00850	6-phosphofructokinase 1	EC:2.7.1.11	fve01200	Carbon metabolism	Metabolism	Overview
TRINITY_DN27311_c0_g2	fve:101293744	88.2	2e-10	-	ATP-dependent 6-phosphofructokinase 6	K00850	6-phosphofructokinase 1	EC:2.7.1.11	fve01230	Biosynthesis of amino acids	Metabolism	Overview
TRINITY_DN27311_c0_g2	fve:101293744	88.2	2e-10	-	ATP-dependent 6-phosphofructokinase 6	K00850	6-phosphofructokinase 1	EC:2.7.1.11	fve00010	Glycolysis / Gluconeogenesis	Metabolism	Carbohydrate metabolism
TRINITY_DN27311_c0_g2	fve:101293744	88.2	2e-10	-	ATP-dependent 6-phosphofructokinase 6	K00850	6-phosphofructokinase 1	EC:2.7.1.11	fve00030	Pentose phosphate pathway	Metabolism	Carbohydrate metabolism
TRINITY_DN27311_c0_g2	fve:101293744	88.2	2e-10	-	ATP-dependent 6-phosphofructokinase 6	K00850	6-phosphofructokinase 1	EC:2.7.1.11	fve00051	Fructose and mannose metabolism	Metabolism	Carbohydrate metabolism
TRINITY_DN27311_c0_g2	fve:101293744	88.2	2e-10	-	ATP-dependent 6-phosphofructokinase 6	K00850	6-phosphofructokinase 1	EC:2.7.1.11	fve00052	Galactose metabolism	Metabolism	Carbohydrate metabolism
TRINITY_DN27311_c0_g2	fve:101293744	88.2	2e-10	-	ATP-dependent 6-phosphofructokinase 6	K00850	6-phosphofructokinase 1	EC:2.7.1.11	fve03018	RNA degradation	Genetic Information Processing	Folding, sorting and degradation
TRINITY_DN27311_c0_g3	fve:101293744	95.3	2.2e-140	-	ATP-dependent 6-phosphofructokinase 6	K00850	6-phosphofructokinase 1	EC:2.7.1.11	fve01200	Carbon metabolism	Metabolism	Overview
TRINITY_DN27311_c0_g3	fve:101293744	95.3	2.2e-140	-	ATP-dependent 6-phosphofructokinase 6	K00850	6-phosphofructokinase 1	EC:2.7.1.11	fve01230	Biosynthesis of amino acids	Metabolism	Overview
TRINITY_DN27311_c0_g3	fve:101293744	95.3	2.2e-140	-	ATP-dependent 6-phosphofructokinase 6	K00850	6-phosphofructokinase 1	EC:2.7.1.11	fve00010	Glycolysis / Gluconeogenesis	Metabolism	Carbohydrate metabolism
TRINITY_DN27311_c0_g3	fve:101293744	95.3	2.2e-140	-	ATP-dependent 6-phosphofructokinase 6	K00850	6-phosphofructokinase 1	EC:2.7.1.11	fve00030	Pentose phosphate pathway	Metabolism	Carbohydrate metabolism
TRINITY_DN27311_c0_g3	fve:101293744	95.3	2.2e-140	-	ATP-dependent 6-phosphofructokinase 6	K00850	6-phosphofructokinase 1	EC:2.7.1.11	fve00051	Fructose and mannose metabolism	Metabolism	Carbohydrate metabolism
TRINITY_DN27311_c0_g3	fve:101293744	95.3	2.2e-140	-	ATP-dependent 6-phosphofructokinase 6	K00850	6-phosphofructokinase 1	EC:2.7.1.11	fve00052	Galactose metabolism	Metabolism	Carbohydrate metabolism
TRINITY_DN27311_c0_g3	fve:101293744	95.3	2.2e-140	-	ATP-dependent 6-phosphofructokinase 6	K00850	6-phosphofructokinase 1	EC:2.7.1.11	fve03018	RNA degradation	Genetic Information Processing	Folding, sorting and degradation
TRINITY_DN27311_c0_g5	fve:101312665	99.1	6.3e-203	-	serine-threonine kinase receptor-associated protein	K13137	serine-threonine kinase receptor-associated protein	-	fve03013	RNA transport	Genetic Information Processing	Translation
TRINITY_DN27311_c1_g3	ppp:PHYPADRAFT_171827	54.8	2e-08	-	hypothetical protein	K10608	tripartite motif-containing protein 37	EC:2.3.2.27	ppp04120	Ubiquitin mediated proteolysis	Genetic Information Processing	Folding, sorting and degradation
TRINITY_DN27313_c1_g2	sbi:SORBI_01g008460	51.1	2e-16	SORBIDRAFT_01g008460	hypothetical protein	K02183	calmodulin	-	sbi04070	Phosphatidylinositol signaling system	Environmental Information Processing	Signal transduction
TRINITY_DN27313_c1_g2	sbi:SORBI_01g008460	51.1	2e-16	SORBIDRAFT_01g008460	hypothetical protein	K02183	calmodulin	-	sbi04626	Plant-pathogen interaction	Organismal Systems	Environmental adaptation
TRINITY_DN27314_c0_g1	vvi:100263785	85.1	1.5e-125	-	eukaryotic translation initiation factor 2 subunit beta	K03238	translation initiation factor 2 subunit 2	-	vvi03013	RNA transport	Genetic Information Processing	Translation
TRINITY_DN27316_c0_g1	fve:101302507	89.8	1.9e-266	-	cytochrome P450 94A1-like	K13407	fatty acid omega-hydroxylase	EC:1.14.-.-	fve00073	Cutin, suberine and wax biosynthesis	Metabolism	Lipid metabolism
TRINITY_DN27317_c0_g1	fve:101304220	96.9	4.6e-143	-	cytochrome P450 90B1	K09587	steroid 22-alpha-hydroxylase	EC:1.14.13.-	fve00905	Brassinosteroid biosynthesis	Metabolism	Metabolism of terpenoids and polyketides
TRINITY_DN27317_c0_g2	fve:101299699	60.2	2.6e-23	-	citrate synthase	K01647	citrate synthase	EC:2.3.3.1	fve01200	Carbon metabolism	Metabolism	Overview
TRINITY_DN27317_c0_g2	fve:101299699	60.2	2.6e-23	-	citrate synthase	K01647	citrate synthase	EC:2.3.3.1	fve01210	2-Oxocarboxylic acid metabolism	Metabolism	Overview
TRINITY_DN27317_c0_g2	fve:101299699	60.2	2.6e-23	-	citrate synthase	K01647	citrate synthase	EC:2.3.3.1	fve01230	Biosynthesis of amino acids	Metabolism	Overview
TRINITY_DN27317_c0_g2	fve:101299699	60.2	2.6e-23	-	citrate synthase	K01647	citrate synthase	EC:2.3.3.1	fve00020	Citrate cycle (TCA cycle)	Metabolism	Carbohydrate metabolism
TRINITY_DN27317_c0_g2	fve:101299699	60.2	2.6e-23	-	citrate synthase	K01647	citrate synthase	EC:2.3.3.1	fve00630	Glyoxylate and dicarboxylate metabolism	Metabolism	Carbohydrate metabolism
TRINITY_DN27317_c0_g4	pxb:103940831	73	4.3e-65	-	uncharacterized CRM domain-containing protein At3g25440	K01148	poly(A)-specific ribonuclease	EC:3.1.13.4	pxb03018	RNA degradation	Genetic Information Processing	Folding, sorting and degradation
TRINITY_DN27317_c0_g6	mus:103994226	55.2	5.9e-41	-	ATP-dependent RNA helicase DHX36	K14442	ATP-dependent RNA helicase DHX36	EC:3.6.4.13	mus03018	RNA degradation	Genetic Information Processing	Folding, sorting and degradation
TRINITY_DN27317_c0_g8	fve:101304220	60.7	1.3e-11	-	cytochrome P450 90B1	K09587	steroid 22-alpha-hydroxylase	EC:1.14.13.-	fve00905	Brassinosteroid biosynthesis	Metabolism	Metabolism of terpenoids and polyketides
TRINITY_DN27318_c0_g1	sbi:SORBI_04g033260	32.4	2.1e-32	SORBIDRAFT_04g033260	hypothetical protein	K11420	euchromatic histone-lysine N-methyltransferase	EC:2.1.1.43	sbi00310	Lysine degradation	Metabolism	Amino acid metabolism
TRINITY_DN27319_c1_g1	brp:103844566	47.1	2.6e-240	-	cellulose synthase-like protein D5	K00770	1,4-beta-D-xylan synthase	EC:2.4.2.24	brp00500	Starch and sucrose metabolism	Metabolism	Carbohydrate metabolism
TRINITY_DN27319_c1_g1	brp:103844566	47.1	2.6e-240	-	cellulose synthase-like protein D5	K00770	1,4-beta-D-xylan synthase	EC:2.4.2.24	brp00520	Amino sugar and nucleotide sugar metabolism	Metabolism	Carbohydrate metabolism
TRINITY_DN27319_c1_g2	pxb:103938349	71.7	6.1e-07	-	triosephosphate isomerase	K01803	triosephosphate isomerase (TIM)	EC:5.3.1.1	pxb01200	Carbon metabolism	Metabolism	Overview
TRINITY_DN27319_c1_g2	pxb:103938349	71.7	6.1e-07	-	triosephosphate isomerase	K01803	triosephosphate isomerase (TIM)	EC:5.3.1.1	pxb01230	Biosynthesis of amino acids	Metabolism	Overview
TRINITY_DN27319_c1_g2	pxb:103938349	71.7	6.1e-07	-	triosephosphate isomerase	K01803	triosephosphate isomerase (TIM)	EC:5.3.1.1	pxb00010	Glycolysis / Gluconeogenesis	Metabolism	Carbohydrate metabolism
TRINITY_DN27319_c1_g2	pxb:103938349	71.7	6.1e-07	-	triosephosphate isomerase	K01803	triosephosphate isomerase (TIM)	EC:5.3.1.1	pxb00051	Fructose and mannose metabolism	Metabolism	Carbohydrate metabolism
TRINITY_DN27319_c1_g2	pxb:103938349	71.7	6.1e-07	-	triosephosphate isomerase	K01803	triosephosphate isomerase (TIM)	EC:5.3.1.1	pxb00562	Inositol phosphate metabolism	Metabolism	Carbohydrate metabolism
TRINITY_DN27319_c1_g2	pxb:103938349	71.7	6.1e-07	-	triosephosphate isomerase	K01803	triosephosphate isomerase (TIM)	EC:5.3.1.1	pxb00710	Carbon fixation in photosynthetic organisms	Metabolism	Energy metabolism
TRINITY_DN27320_c1_g2	fve:101314040	77.6	3e-138	-	cyclic nucleotide-gated ion channel 1-like	K05391	cyclic nucleotide gated channel, other eukaryote	-	fve04626	Plant-pathogen interaction	Organismal Systems	Environmental adaptation
TRINITY_DN27320_c1_g3	fve:101314040	45.6	7.6e-60	-	cyclic nucleotide-gated ion channel 1-like	K05391	cyclic nucleotide gated channel, other eukaryote	-	fve04626	Plant-pathogen interaction	Organismal Systems	Environmental adaptation
TRINITY_DN27320_c1_g4	pper:PRUPE_ppa006192mg	40.5	1.1e-46	-	hypothetical protein	K03065	26S proteasome regulatory subunit T5	-	pper03050	Proteasome	Genetic Information Processing	Folding, sorting and degradation
TRINITY_DN27320_c1_g5	fve:101307656	92.3	1.2e-185	-	dihydroflavonol-4-reductase	K15891	farnesol dehydrogenase	EC:1.1.1.216	fve00900	Terpenoid backbone biosynthesis	Metabolism	Metabolism of terpenoids and polyketides
TRINITY_DN27320_c1_g5	fve:101307656	92.3	1.2e-185	-	dihydroflavonol-4-reductase	K15891	farnesol dehydrogenase	EC:1.1.1.216	fve00909	Sesquiterpenoid and triterpenoid biosynthesis	Metabolism	Metabolism of terpenoids and polyketides
TRINITY_DN27323_c2_g11	sita:101752872	34.4	1.5e-58	-	uncharacterized LOC101752872	K01455	formamidase	EC:3.5.1.49	sita01200	Carbon metabolism	Metabolism	Overview
TRINITY_DN27323_c2_g11	sita:101752872	34.4	1.5e-58	-	uncharacterized LOC101752872	K01455	formamidase	EC:3.5.1.49	sita00630	Glyoxylate and dicarboxylate metabolism	Metabolism	Carbohydrate metabolism
TRINITY_DN27323_c2_g11	sita:101752872	34.4	1.5e-58	-	uncharacterized LOC101752872	K01455	formamidase	EC:3.5.1.49	sita00910	Nitrogen metabolism	Metabolism	Energy metabolism
TRINITY_DN27323_c2_g11	sita:101752872	34.4	1.5e-58	-	uncharacterized LOC101752872	K01455	formamidase	EC:3.5.1.49	sita00460	Cyanoamino acid metabolism	Metabolism	Metabolism of other amino acids
TRINITY_DN27324_c0_g4	crb:CARUB_v10025757mg	29.4	8.9e-13	-	hypothetical protein	K16226	disease resistance protein RPS4	-	crb04626	Plant-pathogen interaction	Organismal Systems	Environmental adaptation
TRINITY_DN27325_c0_g1	fve:101301154	95.4	2.4e-245	-	3-ketoacyl-CoA thiolase 2	K07513	acetyl-CoA acyltransferase 1	EC:2.3.1.16	fve01212	Fatty acid metabolism	Metabolism	Overview
TRINITY_DN27325_c0_g1	fve:101301154	95.4	2.4e-245	-	3-ketoacyl-CoA thiolase 2	K07513	acetyl-CoA acyltransferase 1	EC:2.3.1.16	fve00071	Fatty acid degradation	Metabolism	Lipid metabolism
TRINITY_DN27325_c0_g1	fve:101301154	95.4	2.4e-245	-	3-ketoacyl-CoA thiolase 2	K07513	acetyl-CoA acyltransferase 1	EC:2.3.1.16	fve00592	alpha-Linolenic acid metabolism	Metabolism	Lipid metabolism
TRINITY_DN27325_c0_g1	fve:101301154	95.4	2.4e-245	-	3-ketoacyl-CoA thiolase 2	K07513	acetyl-CoA acyltransferase 1	EC:2.3.1.16	fve01040	Biosynthesis of unsaturated fatty acids	Metabolism	Lipid metabolism
TRINITY_DN27325_c0_g1	fve:101301154	95.4	2.4e-245	-	3-ketoacyl-CoA thiolase 2	K07513	acetyl-CoA acyltransferase 1	EC:2.3.1.16	fve00280	Valine, leucine and isoleucine degradation	Metabolism	Amino acid metabolism
TRINITY_DN27325_c0_g1	fve:101301154	95.4	2.4e-245	-	3-ketoacyl-CoA thiolase 2	K07513	acetyl-CoA acyltransferase 1	EC:2.3.1.16	fve04146	Peroxisome	Cellular Processes	Transport and catabolism
TRINITY_DN27329_c0_g1	csl:COCSUDRAFT_43852	34.8	2.5e-06	-	SKI-domain-containing protein	K00891	shikimate kinase	EC:2.7.1.71	csl01230	Biosynthesis of amino acids	Metabolism	Overview
TRINITY_DN27329_c0_g1	csl:COCSUDRAFT_43852	34.8	2.5e-06	-	SKI-domain-containing protein	K00891	shikimate kinase	EC:2.7.1.71	csl00400	Phenylalanine, tyrosine and tryptophan biosynthesis	Metabolism	Amino acid metabolism
TRINITY_DN27330_c0_g1	pda:103714523	77.3	4e-34	-	cell division cycle 20.2	K03363	cell division cycle 20, cofactor of APC complex	-	pda04120	Ubiquitin mediated proteolysis	Genetic Information Processing	Folding, sorting and degradation
TRINITY_DN27333_c1_g3	sita:101769255	90.2	9.8e-82	-	peroxidase 64-like	K00430	peroxidase	EC:1.11.1.7	sita00940	Phenylpropanoid biosynthesis	Metabolism	Biosynthesis of other secondary metabolites
TRINITY_DN27333_c1_g7	sita:101769255	85.4	9.5e-77	-	peroxidase 64-like	K00430	peroxidase	EC:1.11.1.7	sita00940	Phenylpropanoid biosynthesis	Metabolism	Biosynthesis of other secondary metabolites
TRINITY_DN27334_c0_g4	mdm:103439488	43.1	3.6e-07	-	soluble inorganic pyrophosphatase-like	K01507	inorganic pyrophosphatase	EC:3.6.1.1	mdm00190	Oxidative phosphorylation	Metabolism	Energy metabolism
TRINITY_DN27334_c0_g5	fve:101292190	98.1	5.7e-141	-	calcium-dependent protein kinase 2-like	K13412	calcium-dependent protein kinase	EC:2.7.11.1	fve04626	Plant-pathogen interaction	Organismal Systems	Environmental adaptation
TRINITY_DN27336_c0_g1	pper:PRUPE_ppa012628mg	98.7	4.6e-86	-	hypothetical protein	K06689	ubiquitin-conjugating enzyme E2 D/E	EC:2.3.2.23	pper04141	Protein processing in endoplasmic reticulum	Genetic Information Processing	Folding, sorting and degradation
TRINITY_DN27336_c0_g1	pper:PRUPE_ppa012628mg	98.7	4.6e-86	-	hypothetical protein	K06689	ubiquitin-conjugating enzyme E2 D/E	EC:2.3.2.23	pper04120	Ubiquitin mediated proteolysis	Genetic Information Processing	Folding, sorting and degradation
TRINITY_DN27336_c0_g2	cit:102623736	100	3.7e-85	-	ubiquitin-conjugating enzyme E2-17 kDa-like	K06689	ubiquitin-conjugating enzyme E2 D/E	EC:2.3.2.23	cit04141	Protein processing in endoplasmic reticulum	Genetic Information Processing	Folding, sorting and degradation
TRINITY_DN27336_c0_g2	cit:102623736	100	3.7e-85	-	ubiquitin-conjugating enzyme E2-17 kDa-like	K06689	ubiquitin-conjugating enzyme E2 D/E	EC:2.3.2.23	cit04120	Ubiquitin mediated proteolysis	Genetic Information Processing	Folding, sorting and degradation
TRINITY_DN27336_c0_g3	thj:104826261	100	2.9e-20	-	ubiquitin-conjugating enzyme E2-17 kDa-like	K06689	ubiquitin-conjugating enzyme E2 D/E	EC:2.3.2.23	thj04141	Protein processing in endoplasmic reticulum	Genetic Information Processing	Folding, sorting and degradation
TRINITY_DN27336_c0_g3	thj:104826261	100	2.9e-20	-	ubiquitin-conjugating enzyme E2-17 kDa-like	K06689	ubiquitin-conjugating enzyme E2 D/E	EC:2.3.2.23	thj04120	Ubiquitin mediated proteolysis	Genetic Information Processing	Folding, sorting and degradation
TRINITY_DN27336_c0_g4	cit:102611214	98.9	6.6e-48	-	ubiquitin-conjugating enzyme E2 28-like	K06689	ubiquitin-conjugating enzyme E2 D/E	EC:2.3.2.23	cit04141	Protein processing in endoplasmic reticulum	Genetic Information Processing	Folding, sorting and degradation
TRINITY_DN27336_c0_g4	cit:102611214	98.9	6.6e-48	-	ubiquitin-conjugating enzyme E2 28-like	K06689	ubiquitin-conjugating enzyme E2 D/E	EC:2.3.2.23	cit04120	Ubiquitin mediated proteolysis	Genetic Information Processing	Folding, sorting and degradation
TRINITY_DN27336_c0_g5	cit:102611214	95.7	6.1e-21	-	ubiquitin-conjugating enzyme E2 28-like	K06689	ubiquitin-conjugating enzyme E2 D/E	EC:2.3.2.23	cit04141	Protein processing in endoplasmic reticulum	Genetic Information Processing	Folding, sorting and degradation
TRINITY_DN27336_c0_g5	cit:102611214	95.7	6.1e-21	-	ubiquitin-conjugating enzyme E2 28-like	K06689	ubiquitin-conjugating enzyme E2 D/E	EC:2.3.2.23	cit04120	Ubiquitin mediated proteolysis	Genetic Information Processing	Folding, sorting and degradation
TRINITY_DN27336_c0_g6	cit:102623736	100	4.3e-85	-	ubiquitin-conjugating enzyme E2-17 kDa-like	K06689	ubiquitin-conjugating enzyme E2 D/E	EC:2.3.2.23	cit04141	Protein processing in endoplasmic reticulum	Genetic Information Processing	Folding, sorting and degradation
TRINITY_DN27336_c0_g6	cit:102623736	100	4.3e-85	-	ubiquitin-conjugating enzyme E2-17 kDa-like	K06689	ubiquitin-conjugating enzyme E2 D/E	EC:2.3.2.23	cit04120	Ubiquitin mediated proteolysis	Genetic Information Processing	Folding, sorting and degradation
TRINITY_DN27336_c0_g7	gmx:100499824	100	2.6e-85	-	uncharacterized LOC100499824	K06689	ubiquitin-conjugating enzyme E2 D/E	EC:2.3.2.23	gmx04141	Protein processing in endoplasmic reticulum	Genetic Information Processing	Folding, sorting and degradation
TRINITY_DN27336_c0_g7	gmx:100499824	100	2.6e-85	-	uncharacterized LOC100499824	K06689	ubiquitin-conjugating enzyme E2 D/E	EC:2.3.2.23	gmx04120	Ubiquitin mediated proteolysis	Genetic Information Processing	Folding, sorting and degradation
TRINITY_DN27336_c0_g8	ath:AT4G27960	100	5.1e-36	UBC9	ubiquitin conjugating enzyme 9	K06689	ubiquitin-conjugating enzyme E2 D/E	EC:2.3.2.23	ath04141	Protein processing in endoplasmic reticulum	Genetic Information Processing	Folding, sorting and degradation
TRINITY_DN27336_c0_g8	ath:AT4G27960	100	5.1e-36	UBC9	ubiquitin conjugating enzyme 9	K06689	ubiquitin-conjugating enzyme E2 D/E	EC:2.3.2.23	ath04120	Ubiquitin mediated proteolysis	Genetic Information Processing	Folding, sorting and degradation
TRINITY_DN27338_c0_g2	fve:101315138	97	2.5e-145	-	pre-mRNA-splicing factor ISY1 homolog	K12870	pre-mRNA-splicing factor ISY1	-	fve03040	Spliceosome	Genetic Information Processing	Transcription
TRINITY_DN27339_c0_g1	bdi:104583002	46.2	2.2e-06	-	uncharacterized LOC104583002	K04506	E3 ubiquitin-protein ligase SIAH1	EC:2.3.2.27	bdi04120	Ubiquitin mediated proteolysis	Genetic Information Processing	Folding, sorting and degradation
TRINITY_DN27339_c0_g2	egr:104425084	41.3	7e-51	-	cell division cycle protein 48 homolog	K13525	transitional endoplasmic reticulum ATPase	-	egr04141	Protein processing in endoplasmic reticulum	Genetic Information Processing	Folding, sorting and degradation
TRINITY_DN27340_c0_g1	fve:101302766	100	2e-76	-	40S ribosomal protein S12	K02951	small subunit ribosomal protein S12e	-	fve03010	Ribosome	Genetic Information Processing	Translation
TRINITY_DN27340_c0_g2	fve:101292561	89.5	5.6e-159	-	inositol-tetrakisphosphate 1-kinase 1-like	K00913	inositol-1,3,4-trisphosphate 5/6-kinase / inositol-tetrakisphosphate 1-kinase	EC:2.7.1.159 2.7.1.134	fve00562	Inositol phosphate metabolism	Metabolism	Carbohydrate metabolism
TRINITY_DN27340_c0_g2	fve:101292561	89.5	5.6e-159	-	inositol-tetrakisphosphate 1-kinase 1-like	K00913	inositol-1,3,4-trisphosphate 5/6-kinase / inositol-tetrakisphosphate 1-kinase	EC:2.7.1.159 2.7.1.134	fve04070	Phosphatidylinositol signaling system	Environmental Information Processing	Signal transduction
TRINITY_DN27342_c0_g2	fve:101312618	69.7	9.5e-46	-	probable LRR receptor-like serine/threonine-protein kinase At3g47570	K13420	LRR receptor-like serine/threonine-protein kinase FLS2	EC:2.7.11.1	fve04626	Plant-pathogen interaction	Organismal Systems	Environmental adaptation
TRINITY_DN27342_c0_g3	fve:101312618	70.6	7e-34	-	probable LRR receptor-like serine/threonine-protein kinase At3g47570	K13420	LRR receptor-like serine/threonine-protein kinase FLS2	EC:2.7.11.1	fve04626	Plant-pathogen interaction	Organismal Systems	Environmental adaptation
TRINITY_DN27343_c0_g10	fve:101307302	87.1	1e-07	-	uncharacterized LOC101307302	K03787	5'-nucleotidase	EC:3.1.3.5	fve00230	Purine metabolism	Metabolism	Nucleotide metabolism
TRINITY_DN27343_c0_g10	fve:101307302	87.1	1e-07	-	uncharacterized LOC101307302	K03787	5'-nucleotidase	EC:3.1.3.5	fve00240	Pyrimidine metabolism	Metabolism	Nucleotide metabolism
TRINITY_DN27343_c0_g10	fve:101307302	87.1	1e-07	-	uncharacterized LOC101307302	K03787	5'-nucleotidase	EC:3.1.3.5	fve00760	Nicotinate and nicotinamide metabolism	Metabolism	Metabolism of cofactors and vitamins
TRINITY_DN27343_c0_g4	fve:101307302	88.9	1.5e-156	-	uncharacterized LOC101307302	K03787	5'-nucleotidase	EC:3.1.3.5	fve00230	Purine metabolism	Metabolism	Nucleotide metabolism
TRINITY_DN27343_c0_g4	fve:101307302	88.9	1.5e-156	-	uncharacterized LOC101307302	K03787	5'-nucleotidase	EC:3.1.3.5	fve00240	Pyrimidine metabolism	Metabolism	Nucleotide metabolism
TRINITY_DN27343_c0_g4	fve:101307302	88.9	1.5e-156	-	uncharacterized LOC101307302	K03787	5'-nucleotidase	EC:3.1.3.5	fve00760	Nicotinate and nicotinamide metabolism	Metabolism	Metabolism of cofactors and vitamins
TRINITY_DN27345_c0_g1	aly:ARALYDRAFT_348313	55.7	1.3e-40	-	hypothetical protein	K13126	polyadenylate-binding protein	-	aly03013	RNA transport	Genetic Information Processing	Translation
TRINITY_DN27345_c0_g1	aly:ARALYDRAFT_348313	55.7	1.3e-40	-	hypothetical protein	K13126	polyadenylate-binding protein	-	aly03015	mRNA surveillance pathway	Genetic Information Processing	Translation
TRINITY_DN27345_c0_g1	aly:ARALYDRAFT_348313	55.7	1.3e-40	-	hypothetical protein	K13126	polyadenylate-binding protein	-	aly03018	RNA degradation	Genetic Information Processing	Folding, sorting and degradation
TRINITY_DN27349_c0_g1	fve:101313745	92.6	5.3e-71	-	syntaxin-112	K08486	syntaxin 1B/2/3	-	fve04130	SNARE interactions in vesicular transport	Genetic Information Processing	Folding, sorting and degradation
TRINITY_DN27350_c0_g1	mtr:MTR_0267s0070	45.6	1.9e-43	-	NB-ARC domain disease resistance protein	K12818	ATP-dependent RNA helicase DHX8/PRP22	EC:3.6.4.13	mtr03040	Spliceosome	Genetic Information Processing	Transcription
TRINITY_DN27351_c0_g2	tcc:TCM_015794	74.8	8.5e-253	-	DYNAMIN-like 1E isoform 1	K01528	dynamin GTPase	EC:3.6.5.5	tcc04144	Endocytosis	Cellular Processes	Transport and catabolism
TRINITY_DN27351_c0_g3	nnu:104601250	87.4	5.4e-144	-	chlorophyll a-b binding protein CP29.1	K08915	light-harvesting complex II chlorophyll a/b binding protein 4	-	nnu00196	Photosynthesis - antenna proteins	Metabolism	Energy metabolism
TRINITY_DN27353_c0_g7	fve:101305715	98.5	1.3e-263	-	signal recognition particle 54 kDa protein 2	K03106	signal recognition particle subunit SRP54	EC:3.6.5.4	fve03060	Protein export	Genetic Information Processing	Folding, sorting and degradation
TRINITY_DN27354_c0_g1	pmum:103339007	61.3	1.7e-256	-	lysosomal beta glucosidase-like	K05349	beta-glucosidase	EC:3.2.1.21	pmum00500	Starch and sucrose metabolism	Metabolism	Carbohydrate metabolism
TRINITY_DN27354_c0_g1	pmum:103339007	61.3	1.7e-256	-	lysosomal beta glucosidase-like	K05349	beta-glucosidase	EC:3.2.1.21	pmum00460	Cyanoamino acid metabolism	Metabolism	Metabolism of other amino acids
TRINITY_DN27354_c0_g1	pmum:103339007	61.3	1.7e-256	-	lysosomal beta glucosidase-like	K05349	beta-glucosidase	EC:3.2.1.21	pmum00940	Phenylpropanoid biosynthesis	Metabolism	Biosynthesis of other secondary metabolites
TRINITY_DN27354_c0_g2	fve:101310365	97.5	0	-	galacturonosyltransferase 8	K13648	alpha-1,4-galacturonosyltransferase	EC:2.4.1.43	fve00500	Starch and sucrose metabolism	Metabolism	Carbohydrate metabolism
TRINITY_DN27354_c0_g2	fve:101310365	97.5	0	-	galacturonosyltransferase 8	K13648	alpha-1,4-galacturonosyltransferase	EC:2.4.1.43	fve00520	Amino sugar and nucleotide sugar metabolism	Metabolism	Carbohydrate metabolism
TRINITY_DN27355_c0_g1	fve:101315454	92.9	1.2e-98	-	pectate lyase-like	K01728	pectate lyase	EC:4.2.2.2	fve00040	Pentose and glucuronate interconversions	Metabolism	Carbohydrate metabolism
TRINITY_DN27355_c0_g11	pper:PRUPE_ppa005761mg	94.6	3.7e-167	-	hypothetical protein	K01728	pectate lyase	EC:4.2.2.2	pper00040	Pentose and glucuronate interconversions	Metabolism	Carbohydrate metabolism
TRINITY_DN27355_c0_g12	cme:CYME_CMB070C	29	1.9e-11	-	ubiquitin protein ligase E3A	K10615	E3 ubiquitin-protein ligase HERC4	EC:2.3.2.26	cme04120	Ubiquitin mediated proteolysis	Genetic Information Processing	Folding, sorting and degradation
TRINITY_DN27355_c0_g3	cme:CYME_CMB070C	28.6	3.7e-13	-	ubiquitin protein ligase E3A	K10615	E3 ubiquitin-protein ligase HERC4	EC:2.3.2.26	cme04120	Ubiquitin mediated proteolysis	Genetic Information Processing	Folding, sorting and degradation
TRINITY_DN27355_c0_g4	aly:ARALYDRAFT_683517	47.3	3.3e-15	-	hypothetical protein	K16225	probable WRKY transcription factor 52	-	aly04626	Plant-pathogen interaction	Organismal Systems	Environmental adaptation
TRINITY_DN27355_c0_g6	fve:101315454	94.4	9.5e-94	-	pectate lyase-like	K01728	pectate lyase	EC:4.2.2.2	fve00040	Pentose and glucuronate interconversions	Metabolism	Carbohydrate metabolism
TRINITY_DN27357_c0_g1	jcu:105649085	100	1.7e-43	-	ubiquitin-conjugating enzyme E2-17 kDa	K06689	ubiquitin-conjugating enzyme E2 D/E	EC:2.3.2.23	jcu04141	Protein processing in endoplasmic reticulum	Genetic Information Processing	Folding, sorting and degradation
TRINITY_DN27357_c0_g1	jcu:105649085	100	1.7e-43	-	ubiquitin-conjugating enzyme E2-17 kDa	K06689	ubiquitin-conjugating enzyme E2 D/E	EC:2.3.2.23	jcu04120	Ubiquitin mediated proteolysis	Genetic Information Processing	Folding, sorting and degradation
TRINITY_DN27357_c0_g2	pop:POPTR_0016s14580g	76.2	5.1e-85	POPTRDRAFT_734368	hypothetical protein	K06689	ubiquitin-conjugating enzyme E2 D/E	EC:2.3.2.23	pop04141	Protein processing in endoplasmic reticulum	Genetic Information Processing	Folding, sorting and degradation
TRINITY_DN27357_c0_g2	pop:POPTR_0016s14580g	76.2	5.1e-85	POPTRDRAFT_734368	hypothetical protein	K06689	ubiquitin-conjugating enzyme E2 D/E	EC:2.3.2.23	pop04120	Ubiquitin mediated proteolysis	Genetic Information Processing	Folding, sorting and degradation
TRINITY_DN27357_c0_g6	fve:101309789	94.1	4.4e-172	-	probable fructokinase-4	K00847	fructokinase	EC:2.7.1.4	fve00051	Fructose and mannose metabolism	Metabolism	Carbohydrate metabolism
TRINITY_DN27357_c0_g6	fve:101309789	94.1	4.4e-172	-	probable fructokinase-4	K00847	fructokinase	EC:2.7.1.4	fve00500	Starch and sucrose metabolism	Metabolism	Carbohydrate metabolism
TRINITY_DN27357_c0_g6	fve:101309789	94.1	4.4e-172	-	probable fructokinase-4	K00847	fructokinase	EC:2.7.1.4	fve00520	Amino sugar and nucleotide sugar metabolism	Metabolism	Carbohydrate metabolism
TRINITY_DN27357_c0_g9	gmx:100802703	100	1.4e-84	-	ubiquitin-conjugating enzyme E2 28	K06689	ubiquitin-conjugating enzyme E2 D/E	EC:2.3.2.23	gmx04141	Protein processing in endoplasmic reticulum	Genetic Information Processing	Folding, sorting and degradation
TRINITY_DN27357_c0_g9	gmx:100802703	100	1.4e-84	-	ubiquitin-conjugating enzyme E2 28	K06689	ubiquitin-conjugating enzyme E2 D/E	EC:2.3.2.23	gmx04120	Ubiquitin mediated proteolysis	Genetic Information Processing	Folding, sorting and degradation
TRINITY_DN27358_c0_g1	bna:106381130	32.2	8.9e-14	-	alpha-L-fucosidase 3-like	K01206	alpha-L-fucosidase	EC:3.2.1.51	bna00511	Other glycan degradation	Metabolism	Glycan biosynthesis and metabolism
TRINITY_DN27359_c0_g4	fve:101307578	89.9	0	-	lysine--tRNA ligase-like	K04567	lysyl-tRNA synthetase, class II	EC:6.1.1.6	fve00970	Aminoacyl-tRNA biosynthesis	Genetic Information Processing	Translation
TRINITY_DN27359_c0_g5	vvi:100248565	30.2	4.8e-46	-	abscisate beta-glucosyltransferase-like	K14595	abscisate beta-glucosyltransferase	EC:2.4.1.263	vvi00906	Carotenoid biosynthesis	Metabolism	Metabolism of terpenoids and polyketides
TRINITY_DN27361_c0_g1	crb:CARUB_v10025809mg	46.8	7.1e-12	-	hypothetical protein	K00826	branched-chain amino acid aminotransferase	EC:2.6.1.42	crb01210	2-Oxocarboxylic acid metabolism	Metabolism	Overview
TRINITY_DN27361_c0_g1	crb:CARUB_v10025809mg	46.8	7.1e-12	-	hypothetical protein	K00826	branched-chain amino acid aminotransferase	EC:2.6.1.42	crb01230	Biosynthesis of amino acids	Metabolism	Overview
TRINITY_DN27361_c0_g1	crb:CARUB_v10025809mg	46.8	7.1e-12	-	hypothetical protein	K00826	branched-chain amino acid aminotransferase	EC:2.6.1.42	crb00270	Cysteine and methionine metabolism	Metabolism	Amino acid metabolism
TRINITY_DN27361_c0_g1	crb:CARUB_v10025809mg	46.8	7.1e-12	-	hypothetical protein	K00826	branched-chain amino acid aminotransferase	EC:2.6.1.42	crb00280	Valine, leucine and isoleucine degradation	Metabolism	Amino acid metabolism
TRINITY_DN27361_c0_g1	crb:CARUB_v10025809mg	46.8	7.1e-12	-	hypothetical protein	K00826	branched-chain amino acid aminotransferase	EC:2.6.1.42	crb00290	Valine, leucine and isoleucine biosynthesis	Metabolism	Amino acid metabolism
TRINITY_DN27361_c0_g1	crb:CARUB_v10025809mg	46.8	7.1e-12	-	hypothetical protein	K00826	branched-chain amino acid aminotransferase	EC:2.6.1.42	crb00770	Pantothenate and CoA biosynthesis	Metabolism	Metabolism of cofactors and vitamins
TRINITY_DN27362_c0_g1	vvi:100250285	81.2	1.3e-61	-	glucan endo-1	K19891	glucan endo-1,3-beta-glucosidase 1/2/3	EC:3.2.1.39	vvi00500	Starch and sucrose metabolism	Metabolism	Carbohydrate metabolism
TRINITY_DN27362_c0_g7	fve:101298781	93.6	3e-262	-	glucan endo-1	K19891	glucan endo-1,3-beta-glucosidase 1/2/3	EC:3.2.1.39	fve00500	Starch and sucrose metabolism	Metabolism	Carbohydrate metabolism
TRINITY_DN27364_c1_g2	sly:778199	64.8	2.8e-40	SlWRKY2	WRKY transcription factor 2	K18835	WRKY transcription factor 2	-	sly04626	Plant-pathogen interaction	Organismal Systems	Environmental adaptation
TRINITY_DN27364_c1_g5	fve:101297428	97.1	8.2e-28	-	transcription factor HY5-like	K16241	transcription factor HY5	-	fve04712	Circadian rhythm - plant	Organismal Systems	Environmental adaptation
TRINITY_DN27365_c0_g1	atr:18447024	34.7	3.8e-39	-	cinnamoyl-CoA reductase 1	K09753	cinnamoyl-CoA reductase	EC:1.2.1.44	atr00940	Phenylpropanoid biosynthesis	Metabolism	Biosynthesis of other secondary metabolites
TRINITY_DN27368_c0_g2	ppp:PHYPADRAFT_114892	30.3	1.3e-13	-	hypothetical protein	K13422	transcription factor MYC2	-	ppp04075	Plant hormone signal transduction	Environmental Information Processing	Signal transduction
TRINITY_DN27370_c1_g3	vcn:VOLCADRAFT_86296	43.2	7.8e-27	-	hypothetical protein	K19006	phosphatidylinositol phospholipase C, eta	EC:3.1.4.11	vcn00562	Inositol phosphate metabolism	Metabolism	Carbohydrate metabolism
TRINITY_DN27370_c1_g8	fve:101293874	96.1	0	-	adagio protein 3	K12116	flavin-binding kelch repeat F-box protein 1	-	fve04712	Circadian rhythm - plant	Organismal Systems	Environmental adaptation
TRINITY_DN27372_c0_g1	fve:101303274	96.9	1.8e-261	-	E3 ubiquitin protein ligase RIN2	K10636	autocrine motility factor receptor	EC:2.3.2.27	fve04141	Protein processing in endoplasmic reticulum	Genetic Information Processing	Folding, sorting and degradation
TRINITY_DN27374_c0_g1	fve:101312090	90	5.9e-167	-	peroxidase 17-like	K00430	peroxidase	EC:1.11.1.7	fve00940	Phenylpropanoid biosynthesis	Metabolism	Biosynthesis of other secondary metabolites
TRINITY_DN27374_c0_g2	fve:101313952	95.1	0	-	auxin response factor 5	K14486	auxin response factor	-	fve04075	Plant hormone signal transduction	Environmental Information Processing	Signal transduction
TRINITY_DN27374_c0_g3	pmum:103340619	62.5	6.8e-162	-	auxin response factor 7-like	K14486	auxin response factor	-	pmum04075	Plant hormone signal transduction	Environmental Information Processing	Signal transduction
TRINITY_DN27375_c1_g1	fve:101294531	97.5	8.1e-64	-	probable calcium-binding protein CML18	K13448	calcium-binding protein CML	-	fve04626	Plant-pathogen interaction	Organismal Systems	Environmental adaptation
TRINITY_DN27375_c1_g2	pop:POPTR_0013s00310g	59.7	2.8e-15	POPTRDRAFT_662518	hypothetical protein	K12126	phytochrome-interacting factor 3	-	pop04075	Plant hormone signal transduction	Environmental Information Processing	Signal transduction
TRINITY_DN27375_c1_g2	pop:POPTR_0013s00310g	59.7	2.8e-15	POPTRDRAFT_662518	hypothetical protein	K12126	phytochrome-interacting factor 3	-	pop04712	Circadian rhythm - plant	Organismal Systems	Environmental adaptation
TRINITY_DN27375_c1_g4	pda:103713843	93	4.7e-23	-	two-component response regulator ARR17-like	K14492	two-component response regulator ARR-A family	-	pda04075	Plant hormone signal transduction	Environmental Information Processing	Signal transduction
TRINITY_DN27375_c1_g5	fve:101309603	82.4	3.1e-86	-	two-component response regulator ARR8-like	K14492	two-component response regulator ARR-A family	-	fve04075	Plant hormone signal transduction	Environmental Information Processing	Signal transduction
TRINITY_DN27375_c1_g9	fve:101291489	90.8	0	-	probable alpha	K16055	trehalose 6-phosphate synthase/phosphatase	EC:2.4.1.15 3.1.3.12	fve00500	Starch and sucrose metabolism	Metabolism	Carbohydrate metabolism
TRINITY_DN27377_c0_g1	pper:PRUPE_ppa009041mg	80.5	1.6e-101	-	hypothetical protein	K03094	S-phase kinase-associated protein 1	-	pper04141	Protein processing in endoplasmic reticulum	Genetic Information Processing	Folding, sorting and degradation
TRINITY_DN27377_c0_g1	pper:PRUPE_ppa009041mg	80.5	1.6e-101	-	hypothetical protein	K03094	S-phase kinase-associated protein 1	-	pper04120	Ubiquitin mediated proteolysis	Genetic Information Processing	Folding, sorting and degradation
TRINITY_DN27379_c4_g6	cam:101497514	52	1.6e-19	-	aldehyde dehydrogenase family 3 member H1-like	K00128	aldehyde dehydrogenase (NAD+)	EC:1.2.1.3	cam00010	Glycolysis / Gluconeogenesis	Metabolism	Carbohydrate metabolism
TRINITY_DN27379_c4_g6	cam:101497514	52	1.6e-19	-	aldehyde dehydrogenase family 3 member H1-like	K00128	aldehyde dehydrogenase (NAD+)	EC:1.2.1.3	cam00040	Pentose and glucuronate interconversions	Metabolism	Carbohydrate metabolism
TRINITY_DN27379_c4_g6	cam:101497514	52	1.6e-19	-	aldehyde dehydrogenase family 3 member H1-like	K00128	aldehyde dehydrogenase (NAD+)	EC:1.2.1.3	cam00053	Ascorbate and aldarate metabolism	Metabolism	Carbohydrate metabolism
TRINITY_DN27379_c4_g6	cam:101497514	52	1.6e-19	-	aldehyde dehydrogenase family 3 member H1-like	K00128	aldehyde dehydrogenase (NAD+)	EC:1.2.1.3	cam00620	Pyruvate metabolism	Metabolism	Carbohydrate metabolism
TRINITY_DN27379_c4_g6	cam:101497514	52	1.6e-19	-	aldehyde dehydrogenase family 3 member H1-like	K00128	aldehyde dehydrogenase (NAD+)	EC:1.2.1.3	cam00071	Fatty acid degradation	Metabolism	Lipid metabolism
TRINITY_DN27379_c4_g6	cam:101497514	52	1.6e-19	-	aldehyde dehydrogenase family 3 member H1-like	K00128	aldehyde dehydrogenase (NAD+)	EC:1.2.1.3	cam00561	Glycerolipid metabolism	Metabolism	Lipid metabolism
TRINITY_DN27379_c4_g6	cam:101497514	52	1.6e-19	-	aldehyde dehydrogenase family 3 member H1-like	K00128	aldehyde dehydrogenase (NAD+)	EC:1.2.1.3	cam00280	Valine, leucine and isoleucine degradation	Metabolism	Amino acid metabolism
TRINITY_DN27379_c4_g6	cam:101497514	52	1.6e-19	-	aldehyde dehydrogenase family 3 member H1-like	K00128	aldehyde dehydrogenase (NAD+)	EC:1.2.1.3	cam00310	Lysine degradation	Metabolism	Amino acid metabolism
TRINITY_DN27379_c4_g6	cam:101497514	52	1.6e-19	-	aldehyde dehydrogenase family 3 member H1-like	K00128	aldehyde dehydrogenase (NAD+)	EC:1.2.1.3	cam00330	Arginine and proline metabolism	Metabolism	Amino acid metabolism
TRINITY_DN27379_c4_g6	cam:101497514	52	1.6e-19	-	aldehyde dehydrogenase family 3 member H1-like	K00128	aldehyde dehydrogenase (NAD+)	EC:1.2.1.3	cam00340	Histidine metabolism	Metabolism	Amino acid metabolism
TRINITY_DN27379_c4_g6	cam:101497514	52	1.6e-19	-	aldehyde dehydrogenase family 3 member H1-like	K00128	aldehyde dehydrogenase (NAD+)	EC:1.2.1.3	cam00380	Tryptophan metabolism	Metabolism	Amino acid metabolism
TRINITY_DN27379_c4_g6	cam:101497514	52	1.6e-19	-	aldehyde dehydrogenase family 3 member H1-like	K00128	aldehyde dehydrogenase (NAD+)	EC:1.2.1.3	cam00410	beta-Alanine metabolism	Metabolism	Metabolism of other amino acids
TRINITY_DN27379_c4_g6	cam:101497514	52	1.6e-19	-	aldehyde dehydrogenase family 3 member H1-like	K00128	aldehyde dehydrogenase (NAD+)	EC:1.2.1.3	cam00903	Limonene and pinene degradation	Metabolism	Metabolism of terpenoids and polyketides
TRINITY_DN27380_c1_g1	thj:104811456	70.5	1.1e-36	-	4-coumarate--CoA ligase-like 5	K10526	OPC-8:0 CoA ligase 1	EC:6.2.1.-	thj00592	alpha-Linolenic acid metabolism	Metabolism	Lipid metabolism
TRINITY_DN27381_c0_g1	mdm:103401427	41.7	2e-15	-	uncharacterized LOC103401427	K13415	protein brassinosteroid insensitive 1	EC:2.7.10.1 2.7.11.1	mdm04075	Plant hormone signal transduction	Environmental Information Processing	Signal transduction
TRINITY_DN27383_c0_g1	fve:101308287	93	2.5e-275	-	phosphomethylethanolamine N-methyltransferase-like	K05929	phosphoethanolamine N-methyltransferase	EC:2.1.1.103	fve00564	Glycerophospholipid metabolism	Metabolism	Lipid metabolism
TRINITY_DN27383_c0_g2	cam:101490773	41.7	5.7e-17	-	phosphatidylinositol-glycan biosynthesis class F protein-like	K05287	phosphatidylinositol glycan, class F	EC:2.7.-.-	cam00563	Glycosylphosphatidylinositol(GPI)-anchor biosynthesis	Metabolism	Glycan biosynthesis and metabolism
TRINITY_DN27383_c0_g3	nnu:104609969	83.5	1.6e-247	-	phosphomethylethanolamine N-methyltransferase-like	K05929	phosphoethanolamine N-methyltransferase	EC:2.1.1.103	nnu00564	Glycerophospholipid metabolism	Metabolism	Lipid metabolism
TRINITY_DN27383_c0_g4	cam:101490773	44.2	2.6e-17	-	phosphatidylinositol-glycan biosynthesis class F protein-like	K05287	phosphatidylinositol glycan, class F	EC:2.7.-.-	cam00563	Glycosylphosphatidylinositol(GPI)-anchor biosynthesis	Metabolism	Glycan biosynthesis and metabolism
TRINITY_DN27383_c0_g5	sbi:SORBI_01g035390	25.2	5.3e-15	SORBIDRAFT_01g035390	hypothetical protein	K19073	divinyl chlorophyllide a 8-vinyl-reductase	EC:1.3.1.75	sbi00860	Porphyrin and chlorophyll metabolism	Metabolism	Metabolism of cofactors and vitamins
TRINITY_DN27384_c0_g1	osa:4331523	32.3	8.9e-31	-	Os03g0133400	K13473	chitin elicitor-binding protein	-	osa04626	Plant-pathogen interaction	Organismal Systems	Environmental adaptation
TRINITY_DN27385_c0_g2	fve:101296987	48.8	1e-23	-	serine/threonine-protein kinase CDL1	K13430	serine/threonine-protein kinase PBS1	EC:2.7.11.1	fve04626	Plant-pathogen interaction	Organismal Systems	Environmental adaptation
TRINITY_DN27385_c0_g3	bdi:100824185	41.7	3.4e-59	-	pto-interacting protein 1-like	K13436	pto-interacting protein 1	EC:2.7.11.1	bdi04626	Plant-pathogen interaction	Organismal Systems	Environmental adaptation
TRINITY_DN27387_c1_g1	egr:104427562	23.6	6.2e-24	-	alpha-glucosidase-like	K01187	alpha-glucosidase	EC:3.2.1.20	egr00052	Galactose metabolism	Metabolism	Carbohydrate metabolism
TRINITY_DN27387_c1_g1	egr:104427562	23.6	6.2e-24	-	alpha-glucosidase-like	K01187	alpha-glucosidase	EC:3.2.1.20	egr00500	Starch and sucrose metabolism	Metabolism	Carbohydrate metabolism
TRINITY_DN27387_c1_g2	fve:101297853	93	0	-	prolycopene isomerase	K09835	prolycopene isomerase	EC:5.2.1.13	fve00906	Carotenoid biosynthesis	Metabolism	Metabolism of terpenoids and polyketides
TRINITY_DN27387_c1_g3	thj:104825951	71.8	0	-	cellulose synthase-like protein D5	K00770	1,4-beta-D-xylan synthase	EC:2.4.2.24	thj00500	Starch and sucrose metabolism	Metabolism	Carbohydrate metabolism
TRINITY_DN27387_c1_g3	thj:104825951	71.8	0	-	cellulose synthase-like protein D5	K00770	1,4-beta-D-xylan synthase	EC:2.4.2.24	thj00520	Amino sugar and nucleotide sugar metabolism	Metabolism	Carbohydrate metabolism
TRINITY_DN27387_c1_g4	jcu:105642579	66.8	0	-	cellulose synthase-like protein D5	K00770	1,4-beta-D-xylan synthase	EC:2.4.2.24	jcu00500	Starch and sucrose metabolism	Metabolism	Carbohydrate metabolism
TRINITY_DN27387_c1_g4	jcu:105642579	66.8	0	-	cellulose synthase-like protein D5	K00770	1,4-beta-D-xylan synthase	EC:2.4.2.24	jcu00520	Amino sugar and nucleotide sugar metabolism	Metabolism	Carbohydrate metabolism
TRINITY_DN27388_c0_g1	smo:SELMODRAFT_268342	54.9	1.5e-177	-	hypothetical protein	K05670	ATP-binding cassette, subfamily C (CFTR/MRP), member 13	-	smo02010	ABC transporters	Environmental Information Processing	Membrane transport
TRINITY_DN27388_c0_g2	vra:106773074	77.9	1e-29	-	ABC transporter C family member 8-like	K05665	ATP-binding cassette, subfamily C (CFTR/MRP), member 1	-	vra02010	ABC transporters	Environmental Information Processing	Membrane transport
TRINITY_DN27388_c0_g3	vra:106773074	81.8	6.3e-32	-	ABC transporter C family member 8-like	K05665	ATP-binding cassette, subfamily C (CFTR/MRP), member 1	-	vra02010	ABC transporters	Environmental Information Processing	Membrane transport
TRINITY_DN27388_c0_g4	vra:106773074	62.5	2e-20	-	ABC transporter C family member 8-like	K05665	ATP-binding cassette, subfamily C (CFTR/MRP), member 1	-	vra02010	ABC transporters	Environmental Information Processing	Membrane transport
TRINITY_DN27388_c0_g5	vra:106773074	59.5	2.4e-21	-	ABC transporter C family member 8-like	K05665	ATP-binding cassette, subfamily C (CFTR/MRP), member 1	-	vra02010	ABC transporters	Environmental Information Processing	Membrane transport
TRINITY_DN27389_c0_g1	crb:CARUB_v10017071mg	48.5	3.3e-130	-	hypothetical protein	K00517	-	-	crb00903	Limonene and pinene degradation	Metabolism	Metabolism of terpenoids and polyketides
TRINITY_DN27389_c0_g1	crb:CARUB_v10017071mg	48.5	3.3e-130	-	hypothetical protein	K00517	-	-	crb00945	Stilbenoid, diarylheptanoid and gingerol biosynthesis	Metabolism	Biosynthesis of other secondary metabolites
TRINITY_DN27390_c0_g1	fve:101292717	96.8	2.4e-194	-	ethanolamine-phosphate cytidylyltransferase	K00967	ethanolamine-phosphate cytidylyltransferase	EC:2.7.7.14	fve00564	Glycerophospholipid metabolism	Metabolism	Lipid metabolism
TRINITY_DN27391_c0_g1	sbi:SORBI_06g014310	42.6	6.2e-47	SORBIDRAFT_06g014310	hypothetical protein	K13430	serine/threonine-protein kinase PBS1	EC:2.7.11.1	sbi04626	Plant-pathogen interaction	Organismal Systems	Environmental adaptation
TRINITY_DN27394_c0_g1	fve:101312618	70.5	7.9e-22	-	probable LRR receptor-like serine/threonine-protein kinase At3g47570	K13420	LRR receptor-like serine/threonine-protein kinase FLS2	EC:2.7.11.1	fve04626	Plant-pathogen interaction	Organismal Systems	Environmental adaptation
TRINITY_DN27394_c0_g2	fve:101312618	80.6	6e-27	-	probable LRR receptor-like serine/threonine-protein kinase At3g47570	K13420	LRR receptor-like serine/threonine-protein kinase FLS2	EC:2.7.11.1	fve04626	Plant-pathogen interaction	Organismal Systems	Environmental adaptation
TRINITY_DN27394_c0_g3	pmum:103324996	74.2	2.9e-23	-	putative receptor-like protein kinase At3g47110	K13420	LRR receptor-like serine/threonine-protein kinase FLS2	EC:2.7.11.1	pmum04626	Plant-pathogen interaction	Organismal Systems	Environmental adaptation
TRINITY_DN27394_c0_g4	pxb:103963906	43.7	7.6e-06	-	probable LRR receptor-like serine/threonine-protein kinase At3g47570	K13420	LRR receptor-like serine/threonine-protein kinase FLS2	EC:2.7.11.1	pxb04626	Plant-pathogen interaction	Organismal Systems	Environmental adaptation
TRINITY_DN27395_c0_g1	pmum:103341229	74.2	1.4e-44	-	cysteine-rich receptor-like protein kinase 19	K01183	chitinase	EC:3.2.1.14	pmum00520	Amino sugar and nucleotide sugar metabolism	Metabolism	Carbohydrate metabolism
TRINITY_DN27395_c0_g2	pmum:103341229	71.4	2.4e-22	-	cysteine-rich receptor-like protein kinase 19	K01183	chitinase	EC:3.2.1.14	pmum00520	Amino sugar and nucleotide sugar metabolism	Metabolism	Carbohydrate metabolism
TRINITY_DN27395_c0_g4	pmum:103341229	87.1	6e-39	-	cysteine-rich receptor-like protein kinase 19	K01183	chitinase	EC:3.2.1.14	pmum00520	Amino sugar and nucleotide sugar metabolism	Metabolism	Carbohydrate metabolism
TRINITY_DN27395_c0_g5	pmum:103341229	79.5	7.2e-32	-	cysteine-rich receptor-like protein kinase 19	K01183	chitinase	EC:3.2.1.14	pmum00520	Amino sugar and nucleotide sugar metabolism	Metabolism	Carbohydrate metabolism
TRINITY_DN27395_c1_g1	gmx:100794508	38	4.4e-41	-	G-type lectin S-receptor-like serine/threonine-protein kinase CES101	K01183	chitinase	EC:3.2.1.14	gmx00520	Amino sugar and nucleotide sugar metabolism	Metabolism	Carbohydrate metabolism
TRINITY_DN27397_c0_g2	nnu:104610815	82.5	1.9e-255	-	tyrosine/DOPA decarboxylase 2-like	K01592	tyrosine decarboxylase	EC:4.1.1.25	nnu00350	Tyrosine metabolism	Metabolism	Amino acid metabolism
TRINITY_DN27397_c0_g2	nnu:104610815	82.5	1.9e-255	-	tyrosine/DOPA decarboxylase 2-like	K01592	tyrosine decarboxylase	EC:4.1.1.25	nnu00950	Isoquinoline alkaloid biosynthesis	Metabolism	Biosynthesis of other secondary metabolites
TRINITY_DN27398_c0_g1	pmum:103344134	88.6	1e-33	-	O-glucosyltransferase rumi homolog	K13667	protein glucosyltransferase	EC:2.4.1.-	pmum00514	Other types of O-glycan biosynthesis	Metabolism	Glycan biosynthesis and metabolism
TRINITY_DN27398_c1_g1	pmum:103343024	68.4	4.3e-33	-	O-glucosyltransferase rumi homolog	K13667	protein glucosyltransferase	EC:2.4.1.-	pmum00514	Other types of O-glycan biosynthesis	Metabolism	Glycan biosynthesis and metabolism
TRINITY_DN27398_c1_g3	pper:PRUPE_ppa004159mg	59.9	2e-190	-	hypothetical protein	K13667	protein glucosyltransferase	EC:2.4.1.-	pper00514	Other types of O-glycan biosynthesis	Metabolism	Glycan biosynthesis and metabolism
TRINITY_DN27399_c0_g1	osa:4334472	54.6	1.1e-68	-	Os03g0803000	K08515	vesicle-associated membrane protein 7	-	osa04130	SNARE interactions in vesicular transport	Genetic Information Processing	Folding, sorting and degradation
TRINITY_DN27399_c0_g2	osa:4334472	66	2.2e-15	-	Os03g0803000	K08515	vesicle-associated membrane protein 7	-	osa04130	SNARE interactions in vesicular transport	Genetic Information Processing	Folding, sorting and degradation
TRINITY_DN27400_c0_g2	ath:AT3G28910	90.9	9.8e-18	MYB30	myb domain protein 30	K09422	myb proto-oncogene protein, plant	-	ath04626	Plant-pathogen interaction	Organismal Systems	Environmental adaptation
TRINITY_DN27400_c0_g3	ath:AT3G28910	59.1	5e-75	MYB30	myb domain protein 30	K09422	myb proto-oncogene protein, plant	-	ath04626	Plant-pathogen interaction	Organismal Systems	Environmental adaptation
TRINITY_DN27400_c0_g4	bvg:104901418	31.1	2.6e-13	-	probable ADP-ribosylation factor GTPase-activating protein AGD15	K12486	stromal membrane-associated protein	-	bvg04144	Endocytosis	Cellular Processes	Transport and catabolism
TRINITY_DN27400_c0_g5	ath:AT3G28910	50.5	1.6e-78	MYB30	myb domain protein 30	K09422	myb proto-oncogene protein, plant	-	ath04626	Plant-pathogen interaction	Organismal Systems	Environmental adaptation
TRINITY_DN27400_c0_g6	tcc:TCM_005697	39.5	1.3e-60	-	Pentatricopeptide repeat superfamily protein isoform 1	K01074	palmitoyl-protein thioesterase	EC:3.1.2.22	tcc01212	Fatty acid metabolism	Metabolism	Overview
TRINITY_DN27400_c0_g6	tcc:TCM_005697	39.5	1.3e-60	-	Pentatricopeptide repeat superfamily protein isoform 1	K01074	palmitoyl-protein thioesterase	EC:3.1.2.22	tcc00062	Fatty acid elongation	Metabolism	Lipid metabolism
TRINITY_DN27402_c0_g2	mdm:103415247	37.5	3.3e-07	-	uncharacterized LOC103415247	K18875	enhanced disease susceptibility 1 protein	-	mdm04626	Plant-pathogen interaction	Organismal Systems	Environmental adaptation
TRINITY_DN27403_c0_g1	fve:101302510	94.1	2.6e-242	-	endoglucanase 24-like	K01179	endoglucanase	EC:3.2.1.4	fve00500	Starch and sucrose metabolism	Metabolism	Carbohydrate metabolism
TRINITY_DN27403_c0_g2	fve:101302510	91.5	8e-33	-	endoglucanase 24-like	K01179	endoglucanase	EC:3.2.1.4	fve00500	Starch and sucrose metabolism	Metabolism	Carbohydrate metabolism
TRINITY_DN27407_c0_g1	pmum:103326203	75	8.4e-06	-	superoxide dismutase [Cu-Zn]	K04565	superoxide dismutase, Cu-Zn family	EC:1.15.1.1	pmum04146	Peroxisome	Cellular Processes	Transport and catabolism
TRINITY_DN27407_c0_g2	nnu:104587340	79.1	5.7e-86	-	superoxide dismutase [Cu-Zn]	K04565	superoxide dismutase, Cu-Zn family	EC:1.15.1.1	nnu04146	Peroxisome	Cellular Processes	Transport and catabolism
TRINITY_DN27407_c0_g3	mdm:103428743	96.1	1.9e-68	-	superoxide dismutase [Cu-Zn]	K04565	superoxide dismutase, Cu-Zn family	EC:1.15.1.1	mdm04146	Peroxisome	Cellular Processes	Transport and catabolism
TRINITY_DN27409_c0_g1	bdi:104584507	43.1	6.1e-12	-	disease resistance protein RPM1-like	K13457	disease resistance protein RPM1	-	bdi04626	Plant-pathogen interaction	Organismal Systems	Environmental adaptation
TRINITY_DN27411_c0_g1	fve:101291088	96.5	0	-	brefeldin A-inhibited guanine nucleotide-exchange protein 2-like	K18442	brefeldin A-inhibited guanine nucleotide-exchange protein	-	fve04144	Endocytosis	Cellular Processes	Transport and catabolism
TRINITY_DN27411_c0_g2	fve:101312921	99.8	6.1e-266	-	eukaryotic translation initiation factor 2 subunit gamma-like	K03242	translation initiation factor 2 subunit 3	-	fve03013	RNA transport	Genetic Information Processing	Translation
TRINITY_DN27411_c0_g3	mus:103985802	88.5	9.1e-35	-	brefeldin A-inhibited guanine nucleotide-exchange protein 2-like	K18442	brefeldin A-inhibited guanine nucleotide-exchange protein	-	mus04144	Endocytosis	Cellular Processes	Transport and catabolism
TRINITY_DN27411_c0_g4	nnu:104611051	95.7	5.2e-33	-	brefeldin A-inhibited guanine nucleotide-exchange protein 2-like	K18442	brefeldin A-inhibited guanine nucleotide-exchange protein	-	nnu04144	Endocytosis	Cellular Processes	Transport and catabolism
TRINITY_DN27411_c0_g5	fve:101291088	95.5	0	-	brefeldin A-inhibited guanine nucleotide-exchange protein 2-like	K18442	brefeldin A-inhibited guanine nucleotide-exchange protein	-	fve04144	Endocytosis	Cellular Processes	Transport and catabolism
TRINITY_DN27414_c0_g1	zma:103652355	71	1.1e-33	-	thioredoxin domain-containing protein 9 homolog	K02995	small subunit ribosomal protein S8e	-	zma03010	Ribosome	Genetic Information Processing	Translation
TRINITY_DN27414_c0_g4	ath:AT5G47220	70.8	7.6e-24	ERF2	ethylene-responsive transcription factor 2	K14517	ethylene-responsive transcription factor 2	-	ath04075	Plant hormone signal transduction	Environmental Information Processing	Signal transduction
TRINITY_DN27414_c0_g5	eus:EUTSA_v10004655mg	73.8	3.4e-13	-	hypothetical protein	K16222	Dof zinc finger protein DOF5.5	-	eus04712	Circadian rhythm - plant	Organismal Systems	Environmental adaptation
TRINITY_DN27414_c0_g7	bna:106345734	31.9	1.9e-07	-	polyadenylate-binding protein 6-like	K13126	polyadenylate-binding protein	-	bna03013	RNA transport	Genetic Information Processing	Translation
TRINITY_DN27414_c0_g7	bna:106345734	31.9	1.9e-07	-	polyadenylate-binding protein 6-like	K13126	polyadenylate-binding protein	-	bna03015	mRNA surveillance pathway	Genetic Information Processing	Translation
TRINITY_DN27414_c0_g7	bna:106345734	31.9	1.9e-07	-	polyadenylate-binding protein 6-like	K13126	polyadenylate-binding protein	-	bna03018	RNA degradation	Genetic Information Processing	Folding, sorting and degradation
TRINITY_DN27414_c1_g2	tcc:TCM_028922	30.9	5.6e-12	-	Poly(A) binding protein 6	K13126	polyadenylate-binding protein	-	tcc03013	RNA transport	Genetic Information Processing	Translation
TRINITY_DN27414_c1_g2	tcc:TCM_028922	30.9	5.6e-12	-	Poly(A) binding protein 6	K13126	polyadenylate-binding protein	-	tcc03015	mRNA surveillance pathway	Genetic Information Processing	Translation
TRINITY_DN27414_c1_g2	tcc:TCM_028922	30.9	5.6e-12	-	Poly(A) binding protein 6	K13126	polyadenylate-binding protein	-	tcc03018	RNA degradation	Genetic Information Processing	Folding, sorting and degradation
TRINITY_DN27414_c1_g3	fve:101302395	64	1.7e-08	-	splicing factor 3A subunit 3-like	K12827	splicing factor 3A subunit 3	-	fve03040	Spliceosome	Genetic Information Processing	Transcription
TRINITY_DN27414_c1_g4	eus:EUTSA_v10004655mg	41.2	5.8e-55	-	hypothetical protein	K16222	Dof zinc finger protein DOF5.5	-	eus04712	Circadian rhythm - plant	Organismal Systems	Environmental adaptation
TRINITY_DN27414_c1_g5	pper:PRUPE_ppa001357mg	67.7	9.8e-116	-	hypothetical protein	K01930	folylpolyglutamate synthase	EC:6.3.2.17	pper00790	Folate biosynthesis	Metabolism	Metabolism of cofactors and vitamins
TRINITY_DN27414_c1_g8	eus:EUTSA_v10004655mg	39.4	3.5e-55	-	hypothetical protein	K16222	Dof zinc finger protein DOF5.5	-	eus04712	Circadian rhythm - plant	Organismal Systems	Environmental adaptation
TRINITY_DN27415_c2_g3	mtr:MTR_2g040220	66.7	1.5e-09	-	HSPA4 nucleotide-binding domain protein	K03283	heat shock 70kDa protein 1/8	-	mtr03040	Spliceosome	Genetic Information Processing	Transcription
TRINITY_DN27415_c2_g3	mtr:MTR_2g040220	66.7	1.5e-09	-	HSPA4 nucleotide-binding domain protein	K03283	heat shock 70kDa protein 1/8	-	mtr04141	Protein processing in endoplasmic reticulum	Genetic Information Processing	Folding, sorting and degradation
TRINITY_DN27415_c2_g3	mtr:MTR_2g040220	66.7	1.5e-09	-	HSPA4 nucleotide-binding domain protein	K03283	heat shock 70kDa protein 1/8	-	mtr04144	Endocytosis	Cellular Processes	Transport and catabolism
TRINITY_DN27417_c0_g1	cic:CICLE_v10001881mg	68.8	1.1e-62	-	hypothetical protein	K08726	soluble epoxide hydrolase / lipid-phosphate phosphatase	EC:3.3.2.10 3.1.3.76	cic00590	Arachidonic acid metabolism	Metabolism	Lipid metabolism
TRINITY_DN27417_c0_g1	cic:CICLE_v10001881mg	68.8	1.1e-62	-	hypothetical protein	K08726	soluble epoxide hydrolase / lipid-phosphate phosphatase	EC:3.3.2.10 3.1.3.76	cic04146	Peroxisome	Cellular Processes	Transport and catabolism
TRINITY_DN27417_c0_g3	cic:CICLE_v10001881mg	69.4	5.6e-62	-	hypothetical protein	K08726	soluble epoxide hydrolase / lipid-phosphate phosphatase	EC:3.3.2.10 3.1.3.76	cic00590	Arachidonic acid metabolism	Metabolism	Lipid metabolism
TRINITY_DN27417_c0_g3	cic:CICLE_v10001881mg	69.4	5.6e-62	-	hypothetical protein	K08726	soluble epoxide hydrolase / lipid-phosphate phosphatase	EC:3.3.2.10 3.1.3.76	cic04146	Peroxisome	Cellular Processes	Transport and catabolism
TRINITY_DN27418_c0_g1	cit:102618529	33.3	2.1e-06	-	LRR receptor-like serine/threonine-protein kinase FLS2-like	K13420	LRR receptor-like serine/threonine-protein kinase FLS2	EC:2.7.11.1	cit04626	Plant-pathogen interaction	Organismal Systems	Environmental adaptation
TRINITY_DN27418_c1_g4	brp:103844018	45.5	6.4e-22	-	PTI1-like tyrosine-protein kinase 1	K13436	pto-interacting protein 1	EC:2.7.11.1	brp04626	Plant-pathogen interaction	Organismal Systems	Environmental adaptation
TRINITY_DN27419_c1_g1	mtr:MTR_1g052530	37	1.4e-43	-	calmodulin-domain kinase CDPK protein	K13412	calcium-dependent protein kinase	EC:2.7.11.1	mtr04626	Plant-pathogen interaction	Organismal Systems	Environmental adaptation
TRINITY_DN27419_c1_g6	ath:AT5G62430	48.8	4.5e-18	CDF1	cycling DOF factor 1	K16222	Dof zinc finger protein DOF5.5	-	ath04712	Circadian rhythm - plant	Organismal Systems	Environmental adaptation
TRINITY_DN27419_c1_g7	mtr:MTR_1g052530	36.1	3.5e-42	-	calmodulin-domain kinase CDPK protein	K13412	calcium-dependent protein kinase	EC:2.7.11.1	mtr04626	Plant-pathogen interaction	Organismal Systems	Environmental adaptation
TRINITY_DN2741_c0_g1	brp:103849660	46.6	1.8e-29	-	O-acyltransferase WSD1-like	K15406	wax-ester synthase / diacylglycerol O-acyltransferase	EC:2.3.1.75 2.3.1.20	brp00073	Cutin, suberine and wax biosynthesis	Metabolism	Lipid metabolism
TRINITY_DN27420_c0_g10	cvr:CHLNCDRAFT_134704	50.7	2.7e-14	-	hypothetical protein	K10684	ubiquitin-like 1-activating enzyme E1 A	EC:6.2.1.45	cvr04120	Ubiquitin mediated proteolysis	Genetic Information Processing	Folding, sorting and degradation
TRINITY_DN27420_c0_g2	cvr:CHLNCDRAFT_134704	55.6	1.5e-17	-	hypothetical protein	K10684	ubiquitin-like 1-activating enzyme E1 A	EC:6.2.1.45	cvr04120	Ubiquitin mediated proteolysis	Genetic Information Processing	Folding, sorting and degradation
TRINITY_DN27420_c0_g8	cvr:CHLNCDRAFT_134704	50	6.3e-15	-	hypothetical protein	K10684	ubiquitin-like 1-activating enzyme E1 A	EC:6.2.1.45	cvr04120	Ubiquitin mediated proteolysis	Genetic Information Processing	Folding, sorting and degradation
TRINITY_DN27421_c0_g2	nnu:104612846	35.8	6.7e-56	-	kinesin-1-like protein PSS1	K10396	kinesin family member 5	-	nnu04144	Endocytosis	Cellular Processes	Transport and catabolism
TRINITY_DN27421_c0_g5	brp:103835094	55.6	2.2e-12	-	splicing factor U2af large subunit B-like	K12837	splicing factor U2AF 65 kDa subunit	-	brp03040	Spliceosome	Genetic Information Processing	Transcription
TRINITY_DN27422_c0_g1	pvu:PHAVU_003G047200g	46.3	4.1e-76	-	hypothetical protein	K14595	abscisate beta-glucosyltransferase	EC:2.4.1.263	pvu00906	Carotenoid biosynthesis	Metabolism	Metabolism of terpenoids and polyketides
TRINITY_DN27422_c1_g1	ath:AT2G36750	39.1	7.6e-46	UGT73C1	UDP-glucosyl transferase 73C1	K13496	UDP-glucosyl transferase 73C	EC:2.4.1.-	ath00908	Zeatin biosynthesis	Metabolism	Metabolism of terpenoids and polyketides
TRINITY_DN27422_c1_g2	vvi:100248565	40.9	8e-49	-	abscisate beta-glucosyltransferase-like	K14595	abscisate beta-glucosyltransferase	EC:2.4.1.263	vvi00906	Carotenoid biosynthesis	Metabolism	Metabolism of terpenoids and polyketides
TRINITY_DN27422_c1_g3	vvi:100248565	35.9	9.8e-35	-	abscisate beta-glucosyltransferase-like	K14595	abscisate beta-glucosyltransferase	EC:2.4.1.263	vvi00906	Carotenoid biosynthesis	Metabolism	Metabolism of terpenoids and polyketides
TRINITY_DN27427_c0_g1	mtr:MTR_2g040370	40.9	2.2e-117	-	animal HSPA9 nucleotide-binding domain protein	K03283	heat shock 70kDa protein 1/8	-	mtr03040	Spliceosome	Genetic Information Processing	Transcription
TRINITY_DN27427_c0_g1	mtr:MTR_2g040370	40.9	2.2e-117	-	animal HSPA9 nucleotide-binding domain protein	K03283	heat shock 70kDa protein 1/8	-	mtr04141	Protein processing in endoplasmic reticulum	Genetic Information Processing	Folding, sorting and degradation
TRINITY_DN27427_c0_g1	mtr:MTR_2g040370	40.9	2.2e-117	-	animal HSPA9 nucleotide-binding domain protein	K03283	heat shock 70kDa protein 1/8	-	mtr04144	Endocytosis	Cellular Processes	Transport and catabolism
TRINITY_DN27427_c0_g2	fve:101301923	95.2	2.9e-278	-	serine decarboxylase	K01590	histidine decarboxylase	EC:4.1.1.22	fve00340	Histidine metabolism	Metabolism	Amino acid metabolism
TRINITY_DN27427_c0_g8	nnu:104609601	30.3	7.4e-78	-	pentatricopeptide repeat-containing protein At2g04860	K01176	alpha-amylase	EC:3.2.1.1	nnu00500	Starch and sucrose metabolism	Metabolism	Carbohydrate metabolism
TRINITY_DN27428_c1_g11	sly:101254423	41.8	4.8e-06	-	uncharacterized LOC101254423	K00276	primary-amine oxidase	EC:1.4.3.21	sly00260	Glycine, serine and threonine metabolism	Metabolism	Amino acid metabolism
TRINITY_DN27428_c1_g11	sly:101254423	41.8	4.8e-06	-	uncharacterized LOC101254423	K00276	primary-amine oxidase	EC:1.4.3.21	sly00350	Tyrosine metabolism	Metabolism	Amino acid metabolism
TRINITY_DN27428_c1_g11	sly:101254423	41.8	4.8e-06	-	uncharacterized LOC101254423	K00276	primary-amine oxidase	EC:1.4.3.21	sly00360	Phenylalanine metabolism	Metabolism	Amino acid metabolism
TRINITY_DN27428_c1_g11	sly:101254423	41.8	4.8e-06	-	uncharacterized LOC101254423	K00276	primary-amine oxidase	EC:1.4.3.21	sly00410	beta-Alanine metabolism	Metabolism	Metabolism of other amino acids
TRINITY_DN27428_c1_g11	sly:101254423	41.8	4.8e-06	-	uncharacterized LOC101254423	K00276	primary-amine oxidase	EC:1.4.3.21	sly00950	Isoquinoline alkaloid biosynthesis	Metabolism	Biosynthesis of other secondary metabolites
TRINITY_DN27428_c1_g11	sly:101254423	41.8	4.8e-06	-	uncharacterized LOC101254423	K00276	primary-amine oxidase	EC:1.4.3.21	sly00960	Tropane, piperidine and pyridine alkaloid biosynthesis	Metabolism	Biosynthesis of other secondary metabolites
TRINITY_DN27428_c1_g3	bna:106399005	63.1	3.6e-18	-	uncharacterized LOC106399005	K01054	acylglycerol lipase	EC:3.1.1.23	bna00561	Glycerolipid metabolism	Metabolism	Lipid metabolism
TRINITY_DN27428_c1_g6	mdm:103407548	33.9	2.4e-09	-	G-type lectin S-receptor-like serine/threonine-protein kinase At4g27290	K04382	serine/threonine-protein phosphatase 2A catalytic subunit	EC:3.1.3.16	mdm03015	mRNA surveillance pathway	Genetic Information Processing	Translation
TRINITY_DN27428_c1_g7	mdm:103407548	37.6	4.3e-26	-	G-type lectin S-receptor-like serine/threonine-protein kinase At4g27290	K04382	serine/threonine-protein phosphatase 2A catalytic subunit	EC:3.1.3.16	mdm03015	mRNA surveillance pathway	Genetic Information Processing	Translation
TRINITY_DN27429_c0_g1	pda:103717866	65.3	1.1e-62	-	uncharacterized LOC103717866	K14313	nuclear pore complex protein Nup53	-	pda03013	RNA transport	Genetic Information Processing	Translation
TRINITY_DN27431_c0_g1	fve:101306607	100	5.4e-10	-	L-ascorbate peroxidase	K00434	L-ascorbate peroxidase	EC:1.11.1.11	fve00053	Ascorbate and aldarate metabolism	Metabolism	Carbohydrate metabolism
TRINITY_DN27431_c0_g1	fve:101306607	100	5.4e-10	-	L-ascorbate peroxidase	K00434	L-ascorbate peroxidase	EC:1.11.1.11	fve00480	Glutathione metabolism	Metabolism	Metabolism of other amino acids
TRINITY_DN27432_c1_g1	gmx:547790	45.3	3e-37	SPK-1	protein kinase	K14498	serine/threonine-protein kinase SRK2	EC:2.7.11.1	gmx04075	Plant hormone signal transduction	Environmental Information Processing	Signal transduction
TRINITY_DN27432_c1_g2	pper:PRUPE_ppa008251mg	42.4	2.4e-50	-	hypothetical protein	K14498	serine/threonine-protein kinase SRK2	EC:2.7.11.1	pper04075	Plant hormone signal transduction	Environmental Information Processing	Signal transduction
TRINITY_DN27432_c1_g3	nnu:104601938	39.7	1.7e-14	-	serine/threonine-protein kinase SAPK10-like	K14498	serine/threonine-protein kinase SRK2	EC:2.7.11.1	nnu04075	Plant hormone signal transduction	Environmental Information Processing	Signal transduction
TRINITY_DN27434_c0_g1	cic:CICLE_v10012214mg	65.1	1.3e-118	-	hypothetical protein	K00011	aldehyde reductase	EC:1.1.1.21	cic00040	Pentose and glucuronate interconversions	Metabolism	Carbohydrate metabolism
TRINITY_DN27434_c0_g1	cic:CICLE_v10012214mg	65.1	1.3e-118	-	hypothetical protein	K00011	aldehyde reductase	EC:1.1.1.21	cic00051	Fructose and mannose metabolism	Metabolism	Carbohydrate metabolism
TRINITY_DN27434_c0_g1	cic:CICLE_v10012214mg	65.1	1.3e-118	-	hypothetical protein	K00011	aldehyde reductase	EC:1.1.1.21	cic00052	Galactose metabolism	Metabolism	Carbohydrate metabolism
TRINITY_DN27434_c0_g1	cic:CICLE_v10012214mg	65.1	1.3e-118	-	hypothetical protein	K00011	aldehyde reductase	EC:1.1.1.21	cic00561	Glycerolipid metabolism	Metabolism	Lipid metabolism
TRINITY_DN27434_c0_g2	atr:18436294	69	1.8e-06	-	aldo-keto reductase family 4 member C9	K00011	aldehyde reductase	EC:1.1.1.21	atr00040	Pentose and glucuronate interconversions	Metabolism	Carbohydrate metabolism
TRINITY_DN27434_c0_g2	atr:18436294	69	1.8e-06	-	aldo-keto reductase family 4 member C9	K00011	aldehyde reductase	EC:1.1.1.21	atr00051	Fructose and mannose metabolism	Metabolism	Carbohydrate metabolism
TRINITY_DN27434_c0_g2	atr:18436294	69	1.8e-06	-	aldo-keto reductase family 4 member C9	K00011	aldehyde reductase	EC:1.1.1.21	atr00052	Galactose metabolism	Metabolism	Carbohydrate metabolism
TRINITY_DN27434_c0_g2	atr:18436294	69	1.8e-06	-	aldo-keto reductase family 4 member C9	K00011	aldehyde reductase	EC:1.1.1.21	atr00561	Glycerolipid metabolism	Metabolism	Lipid metabolism
TRINITY_DN27434_c0_g3	thj:104806544	84.7	2.5e-37	-	aldo-keto reductase family 4 member C9-like	K00011	aldehyde reductase	EC:1.1.1.21	thj00040	Pentose and glucuronate interconversions	Metabolism	Carbohydrate metabolism
TRINITY_DN27434_c0_g3	thj:104806544	84.7	2.5e-37	-	aldo-keto reductase family 4 member C9-like	K00011	aldehyde reductase	EC:1.1.1.21	thj00051	Fructose and mannose metabolism	Metabolism	Carbohydrate metabolism
TRINITY_DN27434_c0_g3	thj:104806544	84.7	2.5e-37	-	aldo-keto reductase family 4 member C9-like	K00011	aldehyde reductase	EC:1.1.1.21	thj00052	Galactose metabolism	Metabolism	Carbohydrate metabolism
TRINITY_DN27434_c0_g3	thj:104806544	84.7	2.5e-37	-	aldo-keto reductase family 4 member C9-like	K00011	aldehyde reductase	EC:1.1.1.21	thj00561	Glycerolipid metabolism	Metabolism	Lipid metabolism
TRINITY_DN27434_c0_g5	thj:104806544	68.7	3.3e-22	-	aldo-keto reductase family 4 member C9-like	K00011	aldehyde reductase	EC:1.1.1.21	thj00040	Pentose and glucuronate interconversions	Metabolism	Carbohydrate metabolism
TRINITY_DN27434_c0_g5	thj:104806544	68.7	3.3e-22	-	aldo-keto reductase family 4 member C9-like	K00011	aldehyde reductase	EC:1.1.1.21	thj00051	Fructose and mannose metabolism	Metabolism	Carbohydrate metabolism
TRINITY_DN27434_c0_g5	thj:104806544	68.7	3.3e-22	-	aldo-keto reductase family 4 member C9-like	K00011	aldehyde reductase	EC:1.1.1.21	thj00052	Galactose metabolism	Metabolism	Carbohydrate metabolism
TRINITY_DN27434_c0_g5	thj:104806544	68.7	3.3e-22	-	aldo-keto reductase family 4 member C9-like	K00011	aldehyde reductase	EC:1.1.1.21	thj00561	Glycerolipid metabolism	Metabolism	Lipid metabolism
TRINITY_DN27436_c0_g1	fve:101308181	89.8	2.8e-274	-	phospho-2-dehydro-3-deoxyheptonate aldolase 1	K01626	3-deoxy-7-phosphoheptulonate synthase	EC:2.5.1.54	fve01230	Biosynthesis of amino acids	Metabolism	Overview
TRINITY_DN27436_c0_g1	fve:101308181	89.8	2.8e-274	-	phospho-2-dehydro-3-deoxyheptonate aldolase 1	K01626	3-deoxy-7-phosphoheptulonate synthase	EC:2.5.1.54	fve00400	Phenylalanine, tyrosine and tryptophan biosynthesis	Metabolism	Amino acid metabolism
TRINITY_DN27437_c0_g1	nnu:104597703	100	5.6e-66	-	general negative regulator of transcription subunit 3-like	K12580	CCR4-NOT transcription complex subunit 3	-	nnu03018	RNA degradation	Genetic Information Processing	Folding, sorting and degradation
TRINITY_DN27437_c1_g2	cit:102613279	85.1	3.2e-36	-	CCR4-NOT transcription complex subunit 3-like	K12580	CCR4-NOT transcription complex subunit 3	-	cit03018	RNA degradation	Genetic Information Processing	Folding, sorting and degradation
TRINITY_DN27437_c1_g4	pper:PRUPE_ppa022105mg	93.7	3.2e-63	-	hypothetical protein	K03113	translation initiation factor 1	-	pper03013	RNA transport	Genetic Information Processing	Translation
TRINITY_DN27437_c1_g7	mdm:103426165	37.5	5.2e-14	-	beta-amyrin synthase-like	K15813	beta-amyrin synthase	EC:5.4.99.39	mdm00909	Sesquiterpenoid and triterpenoid biosynthesis	Metabolism	Metabolism of terpenoids and polyketides
TRINITY_DN27439_c0_g1	fve:101290860	93.9	1.8e-96	-	ribulose bisphosphate carboxylase small chain 1	K01602	ribulose-bisphosphate carboxylase small chain	EC:4.1.1.39	fve01200	Carbon metabolism	Metabolism	Overview
TRINITY_DN27439_c0_g1	fve:101290860	93.9	1.8e-96	-	ribulose bisphosphate carboxylase small chain 1	K01602	ribulose-bisphosphate carboxylase small chain	EC:4.1.1.39	fve00630	Glyoxylate and dicarboxylate metabolism	Metabolism	Carbohydrate metabolism
TRINITY_DN27439_c0_g1	fve:101290860	93.9	1.8e-96	-	ribulose bisphosphate carboxylase small chain 1	K01602	ribulose-bisphosphate carboxylase small chain	EC:4.1.1.39	fve00710	Carbon fixation in photosynthetic organisms	Metabolism	Energy metabolism
TRINITY_DN27439_c0_g3	fve:101315253	90.1	2.9e-91	-	ribulose bisphosphate carboxylase small chain	K01602	ribulose-bisphosphate carboxylase small chain	EC:4.1.1.39	fve01200	Carbon metabolism	Metabolism	Overview
TRINITY_DN27439_c0_g3	fve:101315253	90.1	2.9e-91	-	ribulose bisphosphate carboxylase small chain	K01602	ribulose-bisphosphate carboxylase small chain	EC:4.1.1.39	fve00630	Glyoxylate and dicarboxylate metabolism	Metabolism	Carbohydrate metabolism
TRINITY_DN27439_c0_g3	fve:101315253	90.1	2.9e-91	-	ribulose bisphosphate carboxylase small chain	K01602	ribulose-bisphosphate carboxylase small chain	EC:4.1.1.39	fve00710	Carbon fixation in photosynthetic organisms	Metabolism	Energy metabolism
TRINITY_DN27441_c0_g1	fve:101310742	86.5	3.5e-183	-	probable choline kinase 2	K14156	choline/ethanolamine kinase	EC:2.7.1.32 2.7.1.82	fve00564	Glycerophospholipid metabolism	Metabolism	Lipid metabolism
TRINITY_DN27442_c3_g2	fve:101295862	99.5	9.2e-115	-	pre-mRNA cleavage factor Im 25 kDa subunit 2	K14397	cleavage and polyadenylation specificity factor subunit 5	-	fve03015	mRNA surveillance pathway	Genetic Information Processing	Translation
TRINITY_DN27443_c0_g1	brp:103827721	42.6	1.2e-96	-	AP-2 complex subunit mu-like	K11826	AP-2 complex subunit mu-1	-	brp04144	Endocytosis	Cellular Processes	Transport and catabolism
TRINITY_DN27443_c0_g2	mpp:MICPUCDRAFT_29751	42.3	1.4e-48	-	hypothetical protein	K11826	AP-2 complex subunit mu-1	-	mpp04144	Endocytosis	Cellular Processes	Transport and catabolism
TRINITY_DN27444_c0_g1	pxb:103944109	64.6	3.4e-123	-	zingipain-1-like	K01365	cathepsin L	EC:3.4.22.15	pxb04145	Phagosome	Cellular Processes	Transport and catabolism
TRINITY_DN27447_c0_g1	apro:F751_3184	38.6	2e-50	-	Vacuolar protein sorting-associated protein 45-like protein	K12479	vacuolar protein sorting-associated protein 45	-	apro04144	Endocytosis	Cellular Processes	Transport and catabolism
TRINITY_DN27448_c2_g6	atr:18443587	37.3	2.1e-26	-	protein HOTHEAD	K15403	fatty acid omega-hydroxy dehydrogenase	EC:1.1.-.-	atr00073	Cutin, suberine and wax biosynthesis	Metabolism	Lipid metabolism
TRINITY_DN27450_c1_g1	pvu:PHAVU_003G204000g	59.2	4.8e-155	-	hypothetical protein	K00276	primary-amine oxidase	EC:1.4.3.21	pvu00260	Glycine, serine and threonine metabolism	Metabolism	Amino acid metabolism
TRINITY_DN27450_c1_g1	pvu:PHAVU_003G204000g	59.2	4.8e-155	-	hypothetical protein	K00276	primary-amine oxidase	EC:1.4.3.21	pvu00350	Tyrosine metabolism	Metabolism	Amino acid metabolism
TRINITY_DN27450_c1_g1	pvu:PHAVU_003G204000g	59.2	4.8e-155	-	hypothetical protein	K00276	primary-amine oxidase	EC:1.4.3.21	pvu00360	Phenylalanine metabolism	Metabolism	Amino acid metabolism
TRINITY_DN27450_c1_g1	pvu:PHAVU_003G204000g	59.2	4.8e-155	-	hypothetical protein	K00276	primary-amine oxidase	EC:1.4.3.21	pvu00410	beta-Alanine metabolism	Metabolism	Metabolism of other amino acids
TRINITY_DN27450_c1_g1	pvu:PHAVU_003G204000g	59.2	4.8e-155	-	hypothetical protein	K00276	primary-amine oxidase	EC:1.4.3.21	pvu00950	Isoquinoline alkaloid biosynthesis	Metabolism	Biosynthesis of other secondary metabolites
TRINITY_DN27450_c1_g1	pvu:PHAVU_003G204000g	59.2	4.8e-155	-	hypothetical protein	K00276	primary-amine oxidase	EC:1.4.3.21	pvu00960	Tropane, piperidine and pyridine alkaloid biosynthesis	Metabolism	Biosynthesis of other secondary metabolites
TRINITY_DN27450_c1_g2	pvu:PHAVU_003G204000g	51.8	1.1e-17	-	hypothetical protein	K00276	primary-amine oxidase	EC:1.4.3.21	pvu00260	Glycine, serine and threonine metabolism	Metabolism	Amino acid metabolism
TRINITY_DN27450_c1_g2	pvu:PHAVU_003G204000g	51.8	1.1e-17	-	hypothetical protein	K00276	primary-amine oxidase	EC:1.4.3.21	pvu00350	Tyrosine metabolism	Metabolism	Amino acid metabolism
TRINITY_DN27450_c1_g2	pvu:PHAVU_003G204000g	51.8	1.1e-17	-	hypothetical protein	K00276	primary-amine oxidase	EC:1.4.3.21	pvu00360	Phenylalanine metabolism	Metabolism	Amino acid metabolism
TRINITY_DN27450_c1_g2	pvu:PHAVU_003G204000g	51.8	1.1e-17	-	hypothetical protein	K00276	primary-amine oxidase	EC:1.4.3.21	pvu00410	beta-Alanine metabolism	Metabolism	Metabolism of other amino acids
TRINITY_DN27450_c1_g2	pvu:PHAVU_003G204000g	51.8	1.1e-17	-	hypothetical protein	K00276	primary-amine oxidase	EC:1.4.3.21	pvu00950	Isoquinoline alkaloid biosynthesis	Metabolism	Biosynthesis of other secondary metabolites
TRINITY_DN27450_c1_g2	pvu:PHAVU_003G204000g	51.8	1.1e-17	-	hypothetical protein	K00276	primary-amine oxidase	EC:1.4.3.21	pvu00960	Tropane, piperidine and pyridine alkaloid biosynthesis	Metabolism	Biosynthesis of other secondary metabolites
TRINITY_DN27450_c1_g7	pvu:PHAVU_003G204000g	58.2	1.4e-11	-	hypothetical protein	K00276	primary-amine oxidase	EC:1.4.3.21	pvu00260	Glycine, serine and threonine metabolism	Metabolism	Amino acid metabolism
TRINITY_DN27450_c1_g7	pvu:PHAVU_003G204000g	58.2	1.4e-11	-	hypothetical protein	K00276	primary-amine oxidase	EC:1.4.3.21	pvu00350	Tyrosine metabolism	Metabolism	Amino acid metabolism
TRINITY_DN27450_c1_g7	pvu:PHAVU_003G204000g	58.2	1.4e-11	-	hypothetical protein	K00276	primary-amine oxidase	EC:1.4.3.21	pvu00360	Phenylalanine metabolism	Metabolism	Amino acid metabolism
TRINITY_DN27450_c1_g7	pvu:PHAVU_003G204000g	58.2	1.4e-11	-	hypothetical protein	K00276	primary-amine oxidase	EC:1.4.3.21	pvu00410	beta-Alanine metabolism	Metabolism	Metabolism of other amino acids
TRINITY_DN27450_c1_g7	pvu:PHAVU_003G204000g	58.2	1.4e-11	-	hypothetical protein	K00276	primary-amine oxidase	EC:1.4.3.21	pvu00950	Isoquinoline alkaloid biosynthesis	Metabolism	Biosynthesis of other secondary metabolites
TRINITY_DN27450_c1_g7	pvu:PHAVU_003G204000g	58.2	1.4e-11	-	hypothetical protein	K00276	primary-amine oxidase	EC:1.4.3.21	pvu00960	Tropane, piperidine and pyridine alkaloid biosynthesis	Metabolism	Biosynthesis of other secondary metabolites
TRINITY_DN27451_c0_g1	fve:101295967	97.3	1.8e-76	-	caffeoyl-CoA O-methyltransferase	K00588	caffeoyl-CoA O-methyltransferase	EC:2.1.1.104	fve00360	Phenylalanine metabolism	Metabolism	Amino acid metabolism
TRINITY_DN27451_c0_g1	fve:101295967	97.3	1.8e-76	-	caffeoyl-CoA O-methyltransferase	K00588	caffeoyl-CoA O-methyltransferase	EC:2.1.1.104	fve00940	Phenylpropanoid biosynthesis	Metabolism	Biosynthesis of other secondary metabolites
TRINITY_DN27451_c0_g1	fve:101295967	97.3	1.8e-76	-	caffeoyl-CoA O-methyltransferase	K00588	caffeoyl-CoA O-methyltransferase	EC:2.1.1.104	fve00945	Stilbenoid, diarylheptanoid and gingerol biosynthesis	Metabolism	Biosynthesis of other secondary metabolites
TRINITY_DN27451_c0_g1	fve:101295967	97.3	1.8e-76	-	caffeoyl-CoA O-methyltransferase	K00588	caffeoyl-CoA O-methyltransferase	EC:2.1.1.104	fve00941	Flavonoid biosynthesis	Metabolism	Biosynthesis of other secondary metabolites
TRINITY_DN27452_c0_g1	fve:101306316	92.7	1.2e-264	-	glucan endo-1	K19892	glucan endo-1,3-beta-glucosidase 4	EC:3.2.1.39	fve00500	Starch and sucrose metabolism	Metabolism	Carbohydrate metabolism
TRINITY_DN27452_c0_g3	gmx:100795987	84.4	9e-50	-	probable F-actin-capping protein subunit beta	K10365	capping protein (actin filament) muscle Z-line, beta	-	gmx04144	Endocytosis	Cellular Processes	Transport and catabolism
TRINITY_DN27452_c0_g4	pmum:103336177	94.4	6.6e-138	-	probable F-actin-capping protein subunit beta	K10365	capping protein (actin filament) muscle Z-line, beta	-	pmum04144	Endocytosis	Cellular Processes	Transport and catabolism
TRINITY_DN27452_c0_g5	egr:104449567	90.1	8.2e-78	-	probable F-actin-capping protein subunit beta	K10365	capping protein (actin filament) muscle Z-line, beta	-	egr04144	Endocytosis	Cellular Processes	Transport and catabolism
TRINITY_DN27452_c0_g6	fve:101294550	97.2	6.4e-162	-	ribonucleoside-diphosphate reductase small chain A	K10808	ribonucleoside-diphosphate reductase subunit M2	EC:1.17.4.1	fve00230	Purine metabolism	Metabolism	Nucleotide metabolism
TRINITY_DN27452_c0_g6	fve:101294550	97.2	6.4e-162	-	ribonucleoside-diphosphate reductase small chain A	K10808	ribonucleoside-diphosphate reductase subunit M2	EC:1.17.4.1	fve00240	Pyrimidine metabolism	Metabolism	Nucleotide metabolism
TRINITY_DN27452_c0_g6	fve:101294550	97.2	6.4e-162	-	ribonucleoside-diphosphate reductase small chain A	K10808	ribonucleoside-diphosphate reductase subunit M2	EC:1.17.4.1	fve00480	Glutathione metabolism	Metabolism	Metabolism of other amino acids
TRINITY_DN27453_c0_g2	fve:101295117	81.6	9.2e-196	-	inositol 3-kinase	K19517	1D-myo-inositol 3-kinase	EC:2.7.1.64	fve00562	Inositol phosphate metabolism	Metabolism	Carbohydrate metabolism
TRINITY_DN27454_c0_g1	mdm:103403496	86.5	2.7e-10	-	E3 ubiquitin-protein ligase UPL6-like	K10589	ubiquitin-protein ligase E3 C	EC:2.3.2.26	mdm04120	Ubiquitin mediated proteolysis	Genetic Information Processing	Folding, sorting and degradation
TRINITY_DN27455_c0_g1	sbi:SORBI_05g024440	27.5	9.9e-40	SORBIDRAFT_05g024440	hypothetical protein	K08249	hydroxymandelonitrile lyase	EC:4.1.2.11	sbi00460	Cyanoamino acid metabolism	Metabolism	Metabolism of other amino acids
TRINITY_DN27455_c0_g2	sita:101776721	28	1.6e-39	-	P-(S)-hydroxymandelonitrile lyase-like	K08249	hydroxymandelonitrile lyase	EC:4.1.2.11	sita00460	Cyanoamino acid metabolism	Metabolism	Metabolism of other amino acids
TRINITY_DN27455_c0_g3	fve:101301106	89.5	3.9e-234	-	peroxisomal membrane protein PEX14	K13343	peroxin-14	-	fve04146	Peroxisome	Cellular Processes	Transport and catabolism
TRINITY_DN27455_c0_g4	tcc:TCM_042148	65.2	1.5e-29	-	Alpha-L-fucosidase 1	K01206	alpha-L-fucosidase	EC:3.2.1.51	tcc00511	Other glycan degradation	Metabolism	Glycan biosynthesis and metabolism
TRINITY_DN27456_c0_g1	fve:101303359	99.1	1.1e-203	-	GDP-mannose 4	K01711	GDPmannose 4,6-dehydratase	EC:4.2.1.47	fve00051	Fructose and mannose metabolism	Metabolism	Carbohydrate metabolism
TRINITY_DN27456_c0_g1	fve:101303359	99.1	1.1e-203	-	GDP-mannose 4	K01711	GDPmannose 4,6-dehydratase	EC:4.2.1.47	fve00520	Amino sugar and nucleotide sugar metabolism	Metabolism	Carbohydrate metabolism
TRINITY_DN27456_c0_g3	bna:106359921	91.4	1e-31	-	GDP-mannose 4	K01711	GDPmannose 4,6-dehydratase	EC:4.2.1.47	bna00051	Fructose and mannose metabolism	Metabolism	Carbohydrate metabolism
TRINITY_DN27456_c0_g3	bna:106359921	91.4	1e-31	-	GDP-mannose 4	K01711	GDPmannose 4,6-dehydratase	EC:4.2.1.47	bna00520	Amino sugar and nucleotide sugar metabolism	Metabolism	Carbohydrate metabolism
TRINITY_DN27456_c1_g1	egu:105061087	85.7	0	-	heat shock protein 83-like	K09487	heat shock protein 90kDa beta	-	egu04141	Protein processing in endoplasmic reticulum	Genetic Information Processing	Folding, sorting and degradation
TRINITY_DN27456_c1_g1	egu:105061087	85.7	0	-	heat shock protein 83-like	K09487	heat shock protein 90kDa beta	-	egu04626	Plant-pathogen interaction	Organismal Systems	Environmental adaptation
TRINITY_DN27456_c1_g5	fve:101295509	95	1.1e-198	-	heat shock protein 83	K09487	heat shock protein 90kDa beta	-	fve04141	Protein processing in endoplasmic reticulum	Genetic Information Processing	Folding, sorting and degradation
TRINITY_DN27456_c1_g5	fve:101295509	95	1.1e-198	-	heat shock protein 83	K09487	heat shock protein 90kDa beta	-	fve04626	Plant-pathogen interaction	Organismal Systems	Environmental adaptation
TRINITY_DN27456_c1_g6	cit:102613014	95.8	1.2e-105	-	GDP-mannose 4	K01711	GDPmannose 4,6-dehydratase	EC:4.2.1.47	cit00051	Fructose and mannose metabolism	Metabolism	Carbohydrate metabolism
TRINITY_DN27456_c1_g6	cit:102613014	95.8	1.2e-105	-	GDP-mannose 4	K01711	GDPmannose 4,6-dehydratase	EC:4.2.1.47	cit00520	Amino sugar and nucleotide sugar metabolism	Metabolism	Carbohydrate metabolism
TRINITY_DN27456_c1_g9	csv:101208005	94.7	8e-35	-	GDP-mannose 4	K01711	GDPmannose 4,6-dehydratase	EC:4.2.1.47	csv00051	Fructose and mannose metabolism	Metabolism	Carbohydrate metabolism
TRINITY_DN27456_c1_g9	csv:101208005	94.7	8e-35	-	GDP-mannose 4	K01711	GDPmannose 4,6-dehydratase	EC:4.2.1.47	csv00520	Amino sugar and nucleotide sugar metabolism	Metabolism	Carbohydrate metabolism
TRINITY_DN27457_c2_g2	crb:CARUB_v10017892mg	39.4	8.7e-32	-	hypothetical protein	K13126	polyadenylate-binding protein	-	crb03013	RNA transport	Genetic Information Processing	Translation
TRINITY_DN27457_c2_g2	crb:CARUB_v10017892mg	39.4	8.7e-32	-	hypothetical protein	K13126	polyadenylate-binding protein	-	crb03015	mRNA surveillance pathway	Genetic Information Processing	Translation
TRINITY_DN27457_c2_g2	crb:CARUB_v10017892mg	39.4	8.7e-32	-	hypothetical protein	K13126	polyadenylate-binding protein	-	crb03018	RNA degradation	Genetic Information Processing	Folding, sorting and degradation
TRINITY_DN27457_c2_g3	egu:105043648	27.6	2.1e-14	-	non-canonical poly(A) RNA polymerase PAPD5-like	K03514	non-canonical poly(A) RNA polymerase PAPD5/7	EC:2.7.7.19	egu03018	RNA degradation	Genetic Information Processing	Folding, sorting and degradation
TRINITY_DN27458_c0_g2	gra:105774566	86	8.2e-118	-	long chain acyl-CoA synthetase 6	K01897	long-chain acyl-CoA synthetase	EC:6.2.1.3	gra01212	Fatty acid metabolism	Metabolism	Overview
TRINITY_DN27458_c0_g2	gra:105774566	86	8.2e-118	-	long chain acyl-CoA synthetase 6	K01897	long-chain acyl-CoA synthetase	EC:6.2.1.3	gra00061	Fatty acid biosynthesis	Metabolism	Lipid metabolism
TRINITY_DN27458_c0_g2	gra:105774566	86	8.2e-118	-	long chain acyl-CoA synthetase 6	K01897	long-chain acyl-CoA synthetase	EC:6.2.1.3	gra00071	Fatty acid degradation	Metabolism	Lipid metabolism
TRINITY_DN27458_c0_g2	gra:105774566	86	8.2e-118	-	long chain acyl-CoA synthetase 6	K01897	long-chain acyl-CoA synthetase	EC:6.2.1.3	gra04146	Peroxisome	Cellular Processes	Transport and catabolism
TRINITY_DN27458_c0_g3	fve:101294580	74	2.8e-262	-	long chain acyl-CoA synthetase 6	K01897	long-chain acyl-CoA synthetase	EC:6.2.1.3	fve01212	Fatty acid metabolism	Metabolism	Overview
TRINITY_DN27458_c0_g3	fve:101294580	74	2.8e-262	-	long chain acyl-CoA synthetase 6	K01897	long-chain acyl-CoA synthetase	EC:6.2.1.3	fve00061	Fatty acid biosynthesis	Metabolism	Lipid metabolism
TRINITY_DN27458_c0_g3	fve:101294580	74	2.8e-262	-	long chain acyl-CoA synthetase 6	K01897	long-chain acyl-CoA synthetase	EC:6.2.1.3	fve00071	Fatty acid degradation	Metabolism	Lipid metabolism
TRINITY_DN27458_c0_g3	fve:101294580	74	2.8e-262	-	long chain acyl-CoA synthetase 6	K01897	long-chain acyl-CoA synthetase	EC:6.2.1.3	fve04146	Peroxisome	Cellular Processes	Transport and catabolism
TRINITY_DN27459_c0_g3	fve:101297473	77.8	0	-	ATP-dependent RNA helicase DHX36	K14442	ATP-dependent RNA helicase DHX36	EC:3.6.4.13	fve03018	RNA degradation	Genetic Information Processing	Folding, sorting and degradation
TRINITY_DN27460_c1_g3	pxb:103926625	94.3	1.8e-11	-	zinc finger CCCH domain-containing protein 40-like	K12872	pre-mRNA-splicing factor RBM22/SLT11	-	pxb03040	Spliceosome	Genetic Information Processing	Transcription
TRINITY_DN27461_c1_g1	fve:101293898	98.1	3.3e-113	-	60S ribosomal protein L10a-2	K02865	large subunit ribosomal protein L10Ae	-	fve03010	Ribosome	Genetic Information Processing	Translation
TRINITY_DN27461_c1_g2	fve:101309699	98.6	2.5e-115	-	60S ribosomal protein L10a-1	K02865	large subunit ribosomal protein L10Ae	-	fve03010	Ribosome	Genetic Information Processing	Translation
TRINITY_DN27461_c1_g3	mus:103981132	95.8	1.9e-114	-	60S ribosomal protein L10a-1-like	K02865	large subunit ribosomal protein L10Ae	-	mus03010	Ribosome	Genetic Information Processing	Translation
TRINITY_DN27461_c1_g4	vvi:100266487	94.9	2.7e-113	-	60S ribosomal protein L10a-1	K02865	large subunit ribosomal protein L10Ae	-	vvi03010	Ribosome	Genetic Information Processing	Translation
TRINITY_DN27462_c0_g1	nnu:104604801	86.6	1.3e-111	-	uncharacterized LOC104604801	K00940	nucleoside-diphosphate kinase	EC:2.7.4.6	nnu00230	Purine metabolism	Metabolism	Nucleotide metabolism
TRINITY_DN27462_c0_g1	nnu:104604801	86.6	1.3e-111	-	uncharacterized LOC104604801	K00940	nucleoside-diphosphate kinase	EC:2.7.4.6	nnu00240	Pyrimidine metabolism	Metabolism	Nucleotide metabolism
TRINITY_DN27463_c0_g1	fve:101306510	97.6	0	-	adagio protein 1	K12115	clock-associated PAS protein ZTL	-	fve04712	Circadian rhythm - plant	Organismal Systems	Environmental adaptation
TRINITY_DN27464_c0_g2	fve:101315146	95.5	2.5e-292	-	ATP synthase subunit beta	K02133	F-type H+-transporting ATPase subunit beta	EC:3.6.3.14	fve00190	Oxidative phosphorylation	Metabolism	Energy metabolism
TRINITY_DN27466_c0_g1	nnu:104600806	94.3	1.5e-159	-	uncharacterized LOC104600806	K03257	translation initiation factor 4A	-	nnu03013	RNA transport	Genetic Information Processing	Translation
TRINITY_DN27466_c0_g2	nnu:104600806	97.8	9.9e-231	-	uncharacterized LOC104600806	K03257	translation initiation factor 4A	-	nnu03013	RNA transport	Genetic Information Processing	Translation
TRINITY_DN27466_c0_g3	fve:101291689	99.6	1.6e-157	-	eukaryotic initiation factor 4A-2	K03257	translation initiation factor 4A	-	fve03013	RNA transport	Genetic Information Processing	Translation
TRINITY_DN27466_c0_g4	pvu:PHAVU_009G079100g	100	1.7e-66	-	hypothetical protein	K03257	translation initiation factor 4A	-	pvu03013	RNA transport	Genetic Information Processing	Translation
TRINITY_DN27466_c0_g5	egr:104449590	92.8	3.2e-217	-	60S ribosomal protein L3	K02925	large subunit ribosomal protein L3e	-	egr03010	Ribosome	Genetic Information Processing	Translation
TRINITY_DN27467_c0_g2	fve:101315210	91.5	0	-	9-cis-epoxycarotenoid dioxygenase NCED1	K09840	9-cis-epoxycarotenoid dioxygenase	EC:1.13.11.51	fve00906	Carotenoid biosynthesis	Metabolism	Metabolism of terpenoids and polyketides
TRINITY_DN27467_c0_g7	mus:103980779	68.4	8.2e-72	-	uncharacterized protein LOC103980779	K10532	heparan-alpha-glucosaminide N-acetyltransferase	EC:2.3.1.78	mus00531	Glycosaminoglycan degradation	Metabolism	Glycan biosynthesis and metabolism
TRINITY_DN27467_c0_g9	rcu:RCOM_0864470	32	9.1e-13	-	Transcription factor AtMYC2	K13422	transcription factor MYC2	-	rcu04075	Plant hormone signal transduction	Environmental Information Processing	Signal transduction
TRINITY_DN27468_c0_g1	nnu:104596229	36.6	3.4e-51	-	leucoanthocyanidin dioxygenase-like	K05277	leucoanthocyanidin dioxygenase	EC:1.14.11.19	nnu00941	Flavonoid biosynthesis	Metabolism	Biosynthesis of other secondary metabolites
TRINITY_DN27469_c0_g1	pda:103716263	94.9	4.3e-64	-	non-lysosomal glucosylceramidase-like	K17108	non-lysosomal glucosylceramidase	EC:3.2.1.45	pda00600	Sphingolipid metabolism	Metabolism	Lipid metabolism
TRINITY_DN27469_c0_g1	pda:103716263	94.9	4.3e-64	-	non-lysosomal glucosylceramidase-like	K17108	non-lysosomal glucosylceramidase	EC:3.2.1.45	pda00511	Other glycan degradation	Metabolism	Glycan biosynthesis and metabolism
TRINITY_DN27469_c0_g2	pda:103716263	75	2.6e-44	-	non-lysosomal glucosylceramidase-like	K17108	non-lysosomal glucosylceramidase	EC:3.2.1.45	pda00600	Sphingolipid metabolism	Metabolism	Lipid metabolism
TRINITY_DN27469_c0_g2	pda:103716263	75	2.6e-44	-	non-lysosomal glucosylceramidase-like	K17108	non-lysosomal glucosylceramidase	EC:3.2.1.45	pda00511	Other glycan degradation	Metabolism	Glycan biosynthesis and metabolism
TRINITY_DN27469_c0_g4	pda:103716263	92.8	6.2e-41	-	non-lysosomal glucosylceramidase-like	K17108	non-lysosomal glucosylceramidase	EC:3.2.1.45	pda00600	Sphingolipid metabolism	Metabolism	Lipid metabolism
TRINITY_DN27469_c0_g4	pda:103716263	92.8	6.2e-41	-	non-lysosomal glucosylceramidase-like	K17108	non-lysosomal glucosylceramidase	EC:3.2.1.45	pda00511	Other glycan degradation	Metabolism	Glycan biosynthesis and metabolism
TRINITY_DN27469_c1_g1	fve:101298441	88.4	1.6e-44	-	probable calcium-binding protein CML36	K13448	calcium-binding protein CML	-	fve04626	Plant-pathogen interaction	Organismal Systems	Environmental adaptation
TRINITY_DN27469_c1_g2	pmum:103319382	52.9	7e-164	-	cyclic nucleotide-gated ion channel 1-like	K05391	cyclic nucleotide gated channel, other eukaryote	-	pmum04626	Plant-pathogen interaction	Organismal Systems	Environmental adaptation
TRINITY_DN27469_c1_g3	pper:PRUPE_ppb013914mg	50	1.9e-60	-	hypothetical protein	K05391	cyclic nucleotide gated channel, other eukaryote	-	pper04626	Plant-pathogen interaction	Organismal Systems	Environmental adaptation
TRINITY_DN27469_c1_g4	pper:PRUPE_ppa010940mg	51.7	4e-31	-	hypothetical protein	K13448	calcium-binding protein CML	-	pper04626	Plant-pathogen interaction	Organismal Systems	Environmental adaptation
TRINITY_DN27469_c1_g5	fve:101298441	88.5	1.5e-14	-	probable calcium-binding protein CML36	K13448	calcium-binding protein CML	-	fve04626	Plant-pathogen interaction	Organismal Systems	Environmental adaptation
TRINITY_DN27469_c1_g8	eus:EUTSA_v10023115mg	40.2	5.7e-43	-	hypothetical protein	K16224	senescence-induced receptor-like serine/threonine-protein kinase	-	eus04626	Plant-pathogen interaction	Organismal Systems	Environmental adaptation
TRINITY_DN27470_c0_g1	fve:101308429	93.6	0	-	dynamin-2A-like	K01528	dynamin GTPase	EC:3.6.5.5	fve04144	Endocytosis	Cellular Processes	Transport and catabolism
TRINITY_DN27470_c0_g2	egu:105050077	88.2	1.2e-25	-	dynamin-2A-like	K01528	dynamin GTPase	EC:3.6.5.5	egu04144	Endocytosis	Cellular Processes	Transport and catabolism
TRINITY_DN27470_c0_g4	fve:101310494	89.2	2.4e-231	-	dol-P-Man:Man(5)GlcNAc(2)-PP-Dol alpha-1	K03845	alpha-1,3-mannosyltransferase	EC:2.4.1.258	fve00510	N-Glycan biosynthesis	Metabolism	Glycan biosynthesis and metabolism
TRINITY_DN27470_c0_g5	pda:103699261	89.9	2.6e-33	-	dynamin-2A-like	K01528	dynamin GTPase	EC:3.6.5.5	pda04144	Endocytosis	Cellular Processes	Transport and catabolism
TRINITY_DN27474_c0_g1	csl:COCSUDRAFT_23114	28.3	1e-08	-	WD40 repeat-like protein	K10260	F-box and WD-40 domain protein 7	-	csl04120	Ubiquitin mediated proteolysis	Genetic Information Processing	Folding, sorting and degradation
TRINITY_DN27475_c0_g1	mdm:103448456	61.9	1.3e-08	-	ent-copalyl diphosphate synthase	K04120	ent-copalyl diphosphate synthase	EC:5.5.1.13	mdm00904	Diterpenoid biosynthesis	Metabolism	Metabolism of terpenoids and polyketides
TRINITY_DN27476_c0_g2	mus:103974743	44.7	8.8e-31	-	gibberellin 20 oxidase 1-D-like	K05282	gibberellin 20-oxidase	EC:1.14.11.12	mus00904	Diterpenoid biosynthesis	Metabolism	Metabolism of terpenoids and polyketides
TRINITY_DN27476_c0_g3	vra:106763888	38	1.7e-56	-	flavonol synthase/flavanone 3-hydroxylase	K05278	flavonol synthase	EC:1.14.11.23	vra00941	Flavonoid biosynthesis	Metabolism	Biosynthesis of other secondary metabolites
TRINITY_DN27476_c0_g5	sbi:SORBI_07g008510	30.3	2.3e-27	SORBIDRAFT_07g008510	hypothetical protein	K00901	diacylglycerol kinase (ATP)	EC:2.7.1.107	sbi00561	Glycerolipid metabolism	Metabolism	Lipid metabolism
TRINITY_DN27476_c0_g5	sbi:SORBI_07g008510	30.3	2.3e-27	SORBIDRAFT_07g008510	hypothetical protein	K00901	diacylglycerol kinase (ATP)	EC:2.7.1.107	sbi00564	Glycerophospholipid metabolism	Metabolism	Lipid metabolism
TRINITY_DN27476_c0_g5	sbi:SORBI_07g008510	30.3	2.3e-27	SORBIDRAFT_07g008510	hypothetical protein	K00901	diacylglycerol kinase (ATP)	EC:2.7.1.107	sbi04070	Phosphatidylinositol signaling system	Environmental Information Processing	Signal transduction
TRINITY_DN27478_c1_g1	fve:101302671	66.7	7.8e-11	-	U4/U6 small nuclear ribonucleoprotein PRP4-like protein	K12662	U4/U6 small nuclear ribonucleoprotein PRP4	-	fve03040	Spliceosome	Genetic Information Processing	Transcription
TRINITY_DN27478_c1_g3	ota:Ot08g02650	46.4	1.3e-19	-	putative glutamate/ornithine acetyltransferase (ISS)	K00620	glutamate N-acetyltransferase / amino-acid N-acetyltransferase	EC:2.3.1.35 2.3.1.1	ota01210	2-Oxocarboxylic acid metabolism	Metabolism	Overview
TRINITY_DN27478_c1_g3	ota:Ot08g02650	46.4	1.3e-19	-	putative glutamate/ornithine acetyltransferase (ISS)	K00620	glutamate N-acetyltransferase / amino-acid N-acetyltransferase	EC:2.3.1.35 2.3.1.1	ota01230	Biosynthesis of amino acids	Metabolism	Overview
TRINITY_DN27478_c1_g3	ota:Ot08g02650	46.4	1.3e-19	-	putative glutamate/ornithine acetyltransferase (ISS)	K00620	glutamate N-acetyltransferase / amino-acid N-acetyltransferase	EC:2.3.1.35 2.3.1.1	ota00220	Arginine biosynthesis	Metabolism	Amino acid metabolism
TRINITY_DN27481_c0_g1	aly:ARALYDRAFT_685229	60.8	1.1e-46	-	hypothetical protein	K02259	cytochrome c oxidase assembly protein subunit 15	-	aly00190	Oxidative phosphorylation	Metabolism	Energy metabolism
TRINITY_DN27481_c0_g1	aly:ARALYDRAFT_685229	60.8	1.1e-46	-	hypothetical protein	K02259	cytochrome c oxidase assembly protein subunit 15	-	aly00860	Porphyrin and chlorophyll metabolism	Metabolism	Metabolism of cofactors and vitamins
TRINITY_DN27481_c1_g1	ath:AT3G28910	66.2	3.1e-25	MYB30	myb domain protein 30	K09422	myb proto-oncogene protein, plant	-	ath04626	Plant-pathogen interaction	Organismal Systems	Environmental adaptation
TRINITY_DN27481_c3_g2	bdi:100826718	34.7	3.6e-39	-	omega-hydroxypalmitate O-feruloyl transferase-like	K15400	omega-hydroxypalmitate O-feruloyl transferase	EC:2.3.1.188	bdi00073	Cutin, suberine and wax biosynthesis	Metabolism	Lipid metabolism
TRINITY_DN27482_c0_g1	fve:101303786	90.9	3.6e-69	-	17.8 kDa class I heat shock protein-like	K13993	HSP20 family protein	-	fve04141	Protein processing in endoplasmic reticulum	Genetic Information Processing	Folding, sorting and degradation
TRINITY_DN27485_c0_g1	atr:18429240	80.7	1.1e-39	-	probable ADP-ribosylation factor GTPase-activating protein AGD8	K12493	ADP-ribosylation factor GTPase-activating protein 2/3	-	atr04144	Endocytosis	Cellular Processes	Transport and catabolism
TRINITY_DN27485_c0_g2	egu:105053849	76.8	1e-23	-	probable ADP-ribosylation factor GTPase-activating protein AGD8	K12493	ADP-ribosylation factor GTPase-activating protein 2/3	-	egu04144	Endocytosis	Cellular Processes	Transport and catabolism
TRINITY_DN27485_c0_g3	vra:106768846	97.5	5.3e-42	-	probable ADP-ribosylation factor GTPase-activating protein AGD8	K12493	ADP-ribosylation factor GTPase-activating protein 2/3	-	vra04144	Endocytosis	Cellular Processes	Transport and catabolism
TRINITY_DN27485_c1_g1	fve:101307890	92.1	3.1e-189	-	probable ADP-ribosylation factor GTPase-activating protein AGD8	K12493	ADP-ribosylation factor GTPase-activating protein 2/3	-	fve04144	Endocytosis	Cellular Processes	Transport and catabolism
TRINITY_DN27485_c1_g4	mdm:103429954	84.8	4.5e-08	-	anthranilate synthase alpha subunit 2	K01657	anthranilate synthase component I	EC:4.1.3.27	mdm01230	Biosynthesis of amino acids	Metabolism	Overview
TRINITY_DN27485_c1_g4	mdm:103429954	84.8	4.5e-08	-	anthranilate synthase alpha subunit 2	K01657	anthranilate synthase component I	EC:4.1.3.27	mdm00400	Phenylalanine, tyrosine and tryptophan biosynthesis	Metabolism	Amino acid metabolism
TRINITY_DN27485_c1_g5	fve:101292691	89.9	4e-177	-	adenylate isopentenyltransferase 5	K10760	adenylate isopentenyltransferase (cytokinin synthase)	-	fve00908	Zeatin biosynthesis	Metabolism	Metabolism of terpenoids and polyketides
TRINITY_DN27485_c1_g7	vvi:100854648	49.9	7.7e-155	-	L-ascorbate oxidase homolog	K00423	L-ascorbate oxidase	EC:1.10.3.3	vvi00053	Ascorbate and aldarate metabolism	Metabolism	Carbohydrate metabolism
TRINITY_DN27485_c1_g9	mtr:MTR_4g083190	49.4	1.2e-16	-	L-ascorbate oxidase-like protein	K00423	L-ascorbate oxidase	EC:1.10.3.3	mtr00053	Ascorbate and aldarate metabolism	Metabolism	Carbohydrate metabolism
TRINITY_DN27488_c0_g1	mdm:103426788	42.4	3.3e-50	-	serine/threonine-protein kinase/endoribonuclease IRE1a-like	K08852	serine/threonine-protein kinase/endoribonuclease IRE1	EC:2.7.11.1 3.1.26.-	mdm04141	Protein processing in endoplasmic reticulum	Genetic Information Processing	Folding, sorting and degradation
TRINITY_DN27488_c0_g3	mtr:MTR_6g478030	51.6	2.6e-13	-	sucrose synthase	K00695	sucrose synthase	EC:2.4.1.13	mtr00500	Starch and sucrose metabolism	Metabolism	Carbohydrate metabolism
TRINITY_DN27488_c0_g4	mtr:MTR_0267s0070	29.2	7.8e-62	-	NB-ARC domain disease resistance protein	K12818	ATP-dependent RNA helicase DHX8/PRP22	EC:3.6.4.13	mtr03040	Spliceosome	Genetic Information Processing	Transcription
TRINITY_DN27489_c0_g1	atr:18422110	66.3	3e-27	-	acetyl-CoA carboxylase 1	K11262	acetyl-CoA carboxylase / biotin carboxylase 1	EC:6.4.1.2 6.3.4.14	atr01212	Fatty acid metabolism	Metabolism	Overview
TRINITY_DN27489_c0_g1	atr:18422110	66.3	3e-27	-	acetyl-CoA carboxylase 1	K11262	acetyl-CoA carboxylase / biotin carboxylase 1	EC:6.4.1.2 6.3.4.14	atr00620	Pyruvate metabolism	Metabolism	Carbohydrate metabolism
TRINITY_DN27489_c0_g1	atr:18422110	66.3	3e-27	-	acetyl-CoA carboxylase 1	K11262	acetyl-CoA carboxylase / biotin carboxylase 1	EC:6.4.1.2 6.3.4.14	atr00640	Propanoate metabolism	Metabolism	Carbohydrate metabolism
TRINITY_DN27489_c0_g1	atr:18422110	66.3	3e-27	-	acetyl-CoA carboxylase 1	K11262	acetyl-CoA carboxylase / biotin carboxylase 1	EC:6.4.1.2 6.3.4.14	atr00061	Fatty acid biosynthesis	Metabolism	Lipid metabolism
TRINITY_DN27489_c0_g1	atr:18422110	66.3	3e-27	-	acetyl-CoA carboxylase 1	K11262	acetyl-CoA carboxylase / biotin carboxylase 1	EC:6.4.1.2 6.3.4.14	atr00254	Aflatoxin biosynthesis	Metabolism	Biosynthesis of other secondary metabolites
TRINITY_DN27489_c0_g2	fve:101304097	96.6	0	-	acetyl-CoA carboxylase 1-like	K11262	acetyl-CoA carboxylase / biotin carboxylase 1	EC:6.4.1.2 6.3.4.14	fve01212	Fatty acid metabolism	Metabolism	Overview
TRINITY_DN27489_c0_g2	fve:101304097	96.6	0	-	acetyl-CoA carboxylase 1-like	K11262	acetyl-CoA carboxylase / biotin carboxylase 1	EC:6.4.1.2 6.3.4.14	fve00620	Pyruvate metabolism	Metabolism	Carbohydrate metabolism
TRINITY_DN27489_c0_g2	fve:101304097	96.6	0	-	acetyl-CoA carboxylase 1-like	K11262	acetyl-CoA carboxylase / biotin carboxylase 1	EC:6.4.1.2 6.3.4.14	fve00640	Propanoate metabolism	Metabolism	Carbohydrate metabolism
TRINITY_DN27489_c0_g2	fve:101304097	96.6	0	-	acetyl-CoA carboxylase 1-like	K11262	acetyl-CoA carboxylase / biotin carboxylase 1	EC:6.4.1.2 6.3.4.14	fve00061	Fatty acid biosynthesis	Metabolism	Lipid metabolism
TRINITY_DN27489_c0_g2	fve:101304097	96.6	0	-	acetyl-CoA carboxylase 1-like	K11262	acetyl-CoA carboxylase / biotin carboxylase 1	EC:6.4.1.2 6.3.4.14	fve00254	Aflatoxin biosynthesis	Metabolism	Biosynthesis of other secondary metabolites
TRINITY_DN27491_c2_g1	mdm:103427975	24.6	2.8e-10	-	uncharacterized LOC103427975	K12819	pre-mRNA-processing factor SLU7	-	mdm03040	Spliceosome	Genetic Information Processing	Transcription
TRINITY_DN27491_c2_g5	sbi:SORBI_06g024940	46.8	6.8e-07	SORBIDRAFT_06g024940	hypothetical protein	K12662	U4/U6 small nuclear ribonucleoprotein PRP4	-	sbi03040	Spliceosome	Genetic Information Processing	Transcription
TRINITY_DN27495_c0_g2	pxb:103955172	38.5	4.5e-33	-	serine/threonine-protein kinase CTR1-like	K14510	serine/threonine-protein kinase CTR1	EC:2.7.11.1	pxb04075	Plant hormone signal transduction	Environmental Information Processing	Signal transduction
TRINITY_DN27496_c0_g1	mdm:103447654	62.2	3.7e-69	-	anthranilate synthase alpha subunit 1	K01657	anthranilate synthase component I	EC:4.1.3.27	mdm01230	Biosynthesis of amino acids	Metabolism	Overview
TRINITY_DN27496_c0_g1	mdm:103447654	62.2	3.7e-69	-	anthranilate synthase alpha subunit 1	K01657	anthranilate synthase component I	EC:4.1.3.27	mdm00400	Phenylalanine, tyrosine and tryptophan biosynthesis	Metabolism	Amino acid metabolism
TRINITY_DN27497_c0_g1	ppp:PHYPADRAFT_164358	77.4	1.9e-22	-	hypothetical protein	K02942	large subunit ribosomal protein LP1	-	ppp03010	Ribosome	Genetic Information Processing	Translation
TRINITY_DN27498_c0_g1	fve:101315018	66.9	5.2e-37	-	photosystem I subunit O	K14332	photosystem I subunit PsaO	-	fve00195	Photosynthesis	Metabolism	Energy metabolism
TRINITY_DN27499_c1_g4	cam:101511398	68.7	8.1e-23	-	geraniol 8-hydroxylase-like	K07409	cytochrome P450, family 1, subfamily A, polypeptide 2	EC:1.14.14.1	cam00591	Linoleic acid metabolism	Metabolism	Lipid metabolism
TRINITY_DN27499_c1_g4	cam:101511398	68.7	8.1e-23	-	geraniol 8-hydroxylase-like	K07409	cytochrome P450, family 1, subfamily A, polypeptide 2	EC:1.14.14.1	cam00380	Tryptophan metabolism	Metabolism	Amino acid metabolism
TRINITY_DN27499_c1_g4	cam:101511398	68.7	8.1e-23	-	geraniol 8-hydroxylase-like	K07409	cytochrome P450, family 1, subfamily A, polypeptide 2	EC:1.14.14.1	cam00232	Caffeine metabolism	Metabolism	Biosynthesis of other secondary metabolites
TRINITY_DN27499_c1_g5	fve:101304833	85.8	0	-	mannosyl-oligosaccharide glucosidase GCS1	K01228	mannosyl-oligosaccharide glucosidase	EC:3.2.1.106	fve00510	N-Glycan biosynthesis	Metabolism	Glycan biosynthesis and metabolism
TRINITY_DN27499_c1_g5	fve:101304833	85.8	0	-	mannosyl-oligosaccharide glucosidase GCS1	K01228	mannosyl-oligosaccharide glucosidase	EC:3.2.1.106	fve04141	Protein processing in endoplasmic reticulum	Genetic Information Processing	Folding, sorting and degradation
TRINITY_DN27499_c1_g6	gmx:100798291	58.7	7.4e-164	-	geraniol 8-hydroxylase-like	K07409	cytochrome P450, family 1, subfamily A, polypeptide 2	EC:1.14.14.1	gmx00591	Linoleic acid metabolism	Metabolism	Lipid metabolism
TRINITY_DN27499_c1_g6	gmx:100798291	58.7	7.4e-164	-	geraniol 8-hydroxylase-like	K07409	cytochrome P450, family 1, subfamily A, polypeptide 2	EC:1.14.14.1	gmx00380	Tryptophan metabolism	Metabolism	Amino acid metabolism
TRINITY_DN27499_c1_g6	gmx:100798291	58.7	7.4e-164	-	geraniol 8-hydroxylase-like	K07409	cytochrome P450, family 1, subfamily A, polypeptide 2	EC:1.14.14.1	gmx00232	Caffeine metabolism	Metabolism	Biosynthesis of other secondary metabolites
TRINITY_DN27499_c1_g8	fve:101304833	95	2.1e-100	-	mannosyl-oligosaccharide glucosidase GCS1	K01228	mannosyl-oligosaccharide glucosidase	EC:3.2.1.106	fve00510	N-Glycan biosynthesis	Metabolism	Glycan biosynthesis and metabolism
TRINITY_DN27499_c1_g8	fve:101304833	95	2.1e-100	-	mannosyl-oligosaccharide glucosidase GCS1	K01228	mannosyl-oligosaccharide glucosidase	EC:3.2.1.106	fve04141	Protein processing in endoplasmic reticulum	Genetic Information Processing	Folding, sorting and degradation
TRINITY_DN27500_c0_g2	fve:101292606	89.3	3.6e-81	-	probable calcium-binding protein CML41	K13448	calcium-binding protein CML	-	fve04626	Plant-pathogen interaction	Organismal Systems	Environmental adaptation
TRINITY_DN27500_c0_g4	nnu:104595554	92.9	2.4e-173	-	serine hydroxymethyltransferase	K00600	glycine hydroxymethyltransferase	EC:2.1.2.1	nnu01200	Carbon metabolism	Metabolism	Overview
TRINITY_DN27500_c0_g4	nnu:104595554	92.9	2.4e-173	-	serine hydroxymethyltransferase	K00600	glycine hydroxymethyltransferase	EC:2.1.2.1	nnu01230	Biosynthesis of amino acids	Metabolism	Overview
TRINITY_DN27500_c0_g4	nnu:104595554	92.9	2.4e-173	-	serine hydroxymethyltransferase	K00600	glycine hydroxymethyltransferase	EC:2.1.2.1	nnu00630	Glyoxylate and dicarboxylate metabolism	Metabolism	Carbohydrate metabolism
TRINITY_DN27500_c0_g4	nnu:104595554	92.9	2.4e-173	-	serine hydroxymethyltransferase	K00600	glycine hydroxymethyltransferase	EC:2.1.2.1	nnu00260	Glycine, serine and threonine metabolism	Metabolism	Amino acid metabolism
TRINITY_DN27500_c0_g4	nnu:104595554	92.9	2.4e-173	-	serine hydroxymethyltransferase	K00600	glycine hydroxymethyltransferase	EC:2.1.2.1	nnu00460	Cyanoamino acid metabolism	Metabolism	Metabolism of other amino acids
TRINITY_DN27500_c0_g4	nnu:104595554	92.9	2.4e-173	-	serine hydroxymethyltransferase	K00600	glycine hydroxymethyltransferase	EC:2.1.2.1	nnu00670	One carbon pool by folate	Metabolism	Metabolism of cofactors and vitamins
TRINITY_DN27500_c0_g5	pvu:PHAVU_003G286600g	100	1.7e-69	-	hypothetical protein	K00600	glycine hydroxymethyltransferase	EC:2.1.2.1	pvu01200	Carbon metabolism	Metabolism	Overview
TRINITY_DN27500_c0_g5	pvu:PHAVU_003G286600g	100	1.7e-69	-	hypothetical protein	K00600	glycine hydroxymethyltransferase	EC:2.1.2.1	pvu01230	Biosynthesis of amino acids	Metabolism	Overview
TRINITY_DN27500_c0_g5	pvu:PHAVU_003G286600g	100	1.7e-69	-	hypothetical protein	K00600	glycine hydroxymethyltransferase	EC:2.1.2.1	pvu00630	Glyoxylate and dicarboxylate metabolism	Metabolism	Carbohydrate metabolism
TRINITY_DN27500_c0_g5	pvu:PHAVU_003G286600g	100	1.7e-69	-	hypothetical protein	K00600	glycine hydroxymethyltransferase	EC:2.1.2.1	pvu00260	Glycine, serine and threonine metabolism	Metabolism	Amino acid metabolism
TRINITY_DN27500_c0_g5	pvu:PHAVU_003G286600g	100	1.7e-69	-	hypothetical protein	K00600	glycine hydroxymethyltransferase	EC:2.1.2.1	pvu00460	Cyanoamino acid metabolism	Metabolism	Metabolism of other amino acids
TRINITY_DN27500_c0_g5	pvu:PHAVU_003G286600g	100	1.7e-69	-	hypothetical protein	K00600	glycine hydroxymethyltransferase	EC:2.1.2.1	pvu00670	One carbon pool by folate	Metabolism	Metabolism of cofactors and vitamins
TRINITY_DN27501_c0_g1	gmx:102666238	88.2	1.1e-33	-	adenylate kinase 1	K00939	adenylate kinase	EC:2.7.4.3	gmx00230	Purine metabolism	Metabolism	Nucleotide metabolism
TRINITY_DN27501_c0_g2	fve:101312094	92.1	4.5e-150	-	probable adenylate kinase 6	K00939	adenylate kinase	EC:2.7.4.3	fve00230	Purine metabolism	Metabolism	Nucleotide metabolism
TRINITY_DN27501_c0_g3	pxb:103966669	97.5	1.6e-13	-	adenylate kinase-like	K00939	adenylate kinase	EC:2.7.4.3	pxb00230	Purine metabolism	Metabolism	Nucleotide metabolism
TRINITY_DN27501_c0_g4	nnu:104594720	95.8	3.2e-07	-	probable adenylate kinase 1	K00939	adenylate kinase	EC:2.7.4.3	nnu00230	Purine metabolism	Metabolism	Nucleotide metabolism
TRINITY_DN27501_c0_g5	gmx:102666238	89.1	7.8e-45	-	adenylate kinase 1	K00939	adenylate kinase	EC:2.7.4.3	gmx00230	Purine metabolism	Metabolism	Nucleotide metabolism
TRINITY_DN27502_c0_g1	fve:101306058	92.8	0	-	protein LUTEIN DEFICIENT 5	K15747	beta-ring hydroxylase	EC:1.14.-.-	fve00906	Carotenoid biosynthesis	Metabolism	Metabolism of terpenoids and polyketides
TRINITY_DN27502_c0_g3	fve:101306058	82.1	5.4e-09	-	protein LUTEIN DEFICIENT 5	K15747	beta-ring hydroxylase	EC:1.14.-.-	fve00906	Carotenoid biosynthesis	Metabolism	Metabolism of terpenoids and polyketides
TRINITY_DN27502_c0_g4	gmx:100780770	88.6	7.4e-59	CYP97C10	protein LUTEIN DEFICIENT 5, chloroplastic	K15747	beta-ring hydroxylase	EC:1.14.-.-	gmx00906	Carotenoid biosynthesis	Metabolism	Metabolism of terpenoids and polyketides
TRINITY_DN27503_c0_g5	mdm:103427975	53	1.9e-128	-	uncharacterized LOC103427975	K12819	pre-mRNA-processing factor SLU7	-	mdm03040	Spliceosome	Genetic Information Processing	Transcription
TRINITY_DN27505_c0_g7	nnu:104607638	97.5	1.8e-36	-	ubiquitin-60S ribosomal protein L40-like	K02927	large subunit ribosomal protein L40e	-	nnu03010	Ribosome	Genetic Information Processing	Translation
TRINITY_DN27506_c0_g1	fve:101306275	81.2	0	-	eukaryotic translation initiation factor 4G	K03260	translation initiation factor 4G	-	fve03013	RNA transport	Genetic Information Processing	Translation
TRINITY_DN27508_c0_g1	fve:101307597	94.2	0	MLH1	mutL homolog 1	K08734	DNA mismatch repair protein MLH1	-	fve03430	Mismatch repair	Genetic Information Processing	Replication and repair
TRINITY_DN27508_c0_g9	fve:101299472	73	3.6e-283	-	DEAD-box ATP-dependent RNA helicase 40	K12823	ATP-dependent RNA helicase DDX5/DBP2	EC:3.6.4.13	fve03040	Spliceosome	Genetic Information Processing	Transcription
TRINITY_DN2750_c0_g1	vvi:100266951	56.1	2e-06	-	uncharacterized protein At4g04980-like	K05747	Wiskott-Aldrich syndrome protein	-	vvi04144	Endocytosis	Cellular Processes	Transport and catabolism
TRINITY_DN27512_c0_g1	vvi:100250067	89.4	3.9e-137	-	60S acidic ribosomal protein P0	K02941	large subunit ribosomal protein LP0	-	vvi03010	Ribosome	Genetic Information Processing	Translation
TRINITY_DN27512_c0_g2	mtr:MTR_7g058700	43.8	5.2e-10	-	tyrosine/DOPA decarboxylase	K01592	tyrosine decarboxylase	EC:4.1.1.25	mtr00350	Tyrosine metabolism	Metabolism	Amino acid metabolism
TRINITY_DN27512_c0_g2	mtr:MTR_7g058700	43.8	5.2e-10	-	tyrosine/DOPA decarboxylase	K01592	tyrosine decarboxylase	EC:4.1.1.25	mtr00950	Isoquinoline alkaloid biosynthesis	Metabolism	Biosynthesis of other secondary metabolites
TRINITY_DN27512_c0_g3	mtr:MTR_7g058700	40.6	2.2e-06	-	tyrosine/DOPA decarboxylase	K01592	tyrosine decarboxylase	EC:4.1.1.25	mtr00350	Tyrosine metabolism	Metabolism	Amino acid metabolism
TRINITY_DN27512_c0_g3	mtr:MTR_7g058700	40.6	2.2e-06	-	tyrosine/DOPA decarboxylase	K01592	tyrosine decarboxylase	EC:4.1.1.25	mtr00950	Isoquinoline alkaloid biosynthesis	Metabolism	Biosynthesis of other secondary metabolites
TRINITY_DN27513_c0_g1	fve:101296641	91.5	6e-260	-	regulator of nonsense transcripts UPF3	K14328	regulator of nonsense transcripts 3	-	fve03013	RNA transport	Genetic Information Processing	Translation
TRINITY_DN27513_c0_g1	fve:101296641	91.5	6e-260	-	regulator of nonsense transcripts UPF3	K14328	regulator of nonsense transcripts 3	-	fve03015	mRNA surveillance pathway	Genetic Information Processing	Translation
TRINITY_DN27514_c0_g1	pper:PRUPE_ppa023201mg	27.1	2.8e-17	-	hypothetical protein	K13126	polyadenylate-binding protein	-	pper03013	RNA transport	Genetic Information Processing	Translation
TRINITY_DN27514_c0_g1	pper:PRUPE_ppa023201mg	27.1	2.8e-17	-	hypothetical protein	K13126	polyadenylate-binding protein	-	pper03015	mRNA surveillance pathway	Genetic Information Processing	Translation
TRINITY_DN27514_c0_g1	pper:PRUPE_ppa023201mg	27.1	2.8e-17	-	hypothetical protein	K13126	polyadenylate-binding protein	-	pper03018	RNA degradation	Genetic Information Processing	Folding, sorting and degradation
TRINITY_DN27514_c0_g2	pda:103698655	32.3	1e-15	-	small nuclear ribonucleoprotein-associated protein B-like	K11086	small nuclear ribonucleoprotein B and B'	-	pda03040	Spliceosome	Genetic Information Processing	Transcription
TRINITY_DN27514_c0_g3	gra:105786431	97.4	4.8e-86	-	elongation factor 1-alpha-like	K03231	elongation factor 1-alpha	-	gra03013	RNA transport	Genetic Information Processing	Translation
TRINITY_DN27514_c0_g4	aly:ARALYDRAFT_685229	64.1	6.1e-50	-	hypothetical protein	K02259	cytochrome c oxidase assembly protein subunit 15	-	aly00190	Oxidative phosphorylation	Metabolism	Energy metabolism
TRINITY_DN27514_c0_g4	aly:ARALYDRAFT_685229	64.1	6.1e-50	-	hypothetical protein	K02259	cytochrome c oxidase assembly protein subunit 15	-	aly00860	Porphyrin and chlorophyll metabolism	Metabolism	Metabolism of cofactors and vitamins
TRINITY_DN27514_c0_g5	jcu:105642186	98.4	2.9e-259	-	elongation factor 1-alpha	K03231	elongation factor 1-alpha	-	jcu03013	RNA transport	Genetic Information Processing	Translation
TRINITY_DN27516_c0_g1	ath:AT3G48360	62.1	1.5e-95	BT2	TAC1-mediated telomerase activation pathway protein BT2	K00517	-	-	ath00903	Limonene and pinene degradation	Metabolism	Metabolism of terpenoids and polyketides
TRINITY_DN27516_c0_g1	ath:AT3G48360	62.1	1.5e-95	BT2	TAC1-mediated telomerase activation pathway protein BT2	K00517	-	-	ath00945	Stilbenoid, diarylheptanoid and gingerol biosynthesis	Metabolism	Biosynthesis of other secondary metabolites
TRINITY_DN27517_c0_g1	fve:101304989	83.3	1.1e-251	-	ALBINO3-like protein 2	K03217	YidC/Oxa1 family membrane protein insertase	-	fve03060	Protein export	Genetic Information Processing	Folding, sorting and degradation
TRINITY_DN27517_c0_g2	vvi:100266508	89.5	1.5e-104	-	pre-mRNA-splicing factor 38	K12849	pre-mRNA-splicing factor 38A	-	vvi03040	Spliceosome	Genetic Information Processing	Transcription
TRINITY_DN27517_c0_g3	bna:106406031	33.3	6.8e-35	-	ATP-dependent DNA helicase RecG	K03655	ATP-dependent DNA helicase RecG	EC:3.6.4.12	bna03440	Homologous recombination	Genetic Information Processing	Replication and repair
TRINITY_DN27518_c0_g1	mdm:103437977	73	1.6e-220	-	cytochrome P450 94A2-like	K00517	-	-	mdm00903	Limonene and pinene degradation	Metabolism	Metabolism of terpenoids and polyketides
TRINITY_DN27518_c0_g1	mdm:103437977	73	1.6e-220	-	cytochrome P450 94A2-like	K00517	-	-	mdm00945	Stilbenoid, diarylheptanoid and gingerol biosynthesis	Metabolism	Biosynthesis of other secondary metabolites
TRINITY_DN27521_c1_g1	fve:101296736	88.5	4e-58	-	oxygen-evolving enhancer protein 3-2	K08901	photosystem II oxygen-evolving enhancer protein 3	-	fve00195	Photosynthesis	Metabolism	Energy metabolism
TRINITY_DN27521_c1_g2	cit:102624793	35.7	4.9e-70	-	topless-related protein 4-like	K14558	periodic tryptophan protein 2	-	cit03008	Ribosome biogenesis in eukaryotes	Genetic Information Processing	Translation
TRINITY_DN27521_c1_g3	fve:101301393	94.4	1e-70	-	ferredoxin-1-like	K02639	ferredoxin	-	fve00195	Photosynthesis	Metabolism	Energy metabolism
TRINITY_DN27521_c1_g4	cit:102624793	38.1	2.6e-30	-	topless-related protein 4-like	K14558	periodic tryptophan protein 2	-	cit03008	Ribosome biogenesis in eukaryotes	Genetic Information Processing	Translation
TRINITY_DN27523_c0_g1	mtr:MTR_3g040300	23.4	1.3e-07	-	transcription initiation factor IIB	K03124	transcription initiation factor TFIIB	-	mtr03022	Basal transcription factors	Genetic Information Processing	Transcription
TRINITY_DN27525_c0_g1	fve:101312341	93	8.7e-67	-	serine/arginine-rich splicing factor RSZ21	K12896	splicing factor, arginine/serine-rich 7	-	fve03040	Spliceosome	Genetic Information Processing	Transcription
TRINITY_DN27527_c1_g1	fve:101293715	92.9	5.9e-236	-	3-dehydroquinate synthase	K01735	3-dehydroquinate synthase	EC:4.2.3.4	fve01230	Biosynthesis of amino acids	Metabolism	Overview
TRINITY_DN27527_c1_g1	fve:101293715	92.9	5.9e-236	-	3-dehydroquinate synthase	K01735	3-dehydroquinate synthase	EC:4.2.3.4	fve00400	Phenylalanine, tyrosine and tryptophan biosynthesis	Metabolism	Amino acid metabolism
TRINITY_DN27527_c1_g10	olu:OSTLU_14434	56.3	4.5e-17	-	hypothetical protein	K10598	peptidyl-prolyl cis-trans isomerase-like 2	EC:5.2.1.8	olu04120	Ubiquitin mediated proteolysis	Genetic Information Processing	Folding, sorting and degradation
TRINITY_DN27527_c1_g3	nnu:104595172	68.6	1.9e-44	-	30S ribosomal protein S17	K02961	small subunit ribosomal protein S17	-	nnu03010	Ribosome	Genetic Information Processing	Translation
TRINITY_DN27527_c1_g8	egu:105059639	86.5	6e-195	-	3-dehydroquinate synthase	K01735	3-dehydroquinate synthase	EC:4.2.3.4	egu01230	Biosynthesis of amino acids	Metabolism	Overview
TRINITY_DN27527_c1_g8	egu:105059639	86.5	6e-195	-	3-dehydroquinate synthase	K01735	3-dehydroquinate synthase	EC:4.2.3.4	egu00400	Phenylalanine, tyrosine and tryptophan biosynthesis	Metabolism	Amino acid metabolism
TRINITY_DN27527_c1_g9	pper:PRUPE_ppa004784mg	52.7	5.8e-19	-	hypothetical protein	K01735	3-dehydroquinate synthase	EC:4.2.3.4	pper01230	Biosynthesis of amino acids	Metabolism	Overview
TRINITY_DN27527_c1_g9	pper:PRUPE_ppa004784mg	52.7	5.8e-19	-	hypothetical protein	K01735	3-dehydroquinate synthase	EC:4.2.3.4	pper00400	Phenylalanine, tyrosine and tryptophan biosynthesis	Metabolism	Amino acid metabolism
TRINITY_DN27528_c0_g1	brp:103843500	41.9	1.9e-60	-	PTI1-like tyrosine-protein kinase 1	K13436	pto-interacting protein 1	EC:2.7.11.1	brp04626	Plant-pathogen interaction	Organismal Systems	Environmental adaptation
TRINITY_DN27528_c1_g12	bna:106355529	45.3	3.8e-06	-	ubiquitin carboxyl-terminal hydrolase 10-like	K11839	ubiquitin carboxyl-terminal hydrolase 8	EC:3.4.19.12	bna04144	Endocytosis	Cellular Processes	Transport and catabolism
TRINITY_DN27528_c1_g2	fve:101291028	82	4.6e-124	-	30S ribosomal protein S5	K02988	small subunit ribosomal protein S5	-	fve03010	Ribosome	Genetic Information Processing	Translation
TRINITY_DN27530_c0_g3	fve:101304512	96.1	7.8e-201	-	serine/threonine-protein kinase SRK2I	K14498	serine/threonine-protein kinase SRK2	EC:2.7.11.1	fve04075	Plant hormone signal transduction	Environmental Information Processing	Signal transduction
TRINITY_DN27530_c0_g6	pvu:PHAVU_009G157800g	90.6	1.9e-10	-	hypothetical protein	K14498	serine/threonine-protein kinase SRK2	EC:2.7.11.1	pvu04075	Plant hormone signal transduction	Environmental Information Processing	Signal transduction
TRINITY_DN27531_c0_g1	pmum:103326339	88.9	1.2e-06	-	beta-glucosidase 18-like	K05350	beta-glucosidase	EC:3.2.1.21	pmum00500	Starch and sucrose metabolism	Metabolism	Carbohydrate metabolism
TRINITY_DN27531_c0_g1	pmum:103326339	88.9	1.2e-06	-	beta-glucosidase 18-like	K05350	beta-glucosidase	EC:3.2.1.21	pmum00460	Cyanoamino acid metabolism	Metabolism	Metabolism of other amino acids
TRINITY_DN27531_c0_g1	pmum:103326339	88.9	1.2e-06	-	beta-glucosidase 18-like	K05350	beta-glucosidase	EC:3.2.1.21	pmum00940	Phenylpropanoid biosynthesis	Metabolism	Biosynthesis of other secondary metabolites
TRINITY_DN27531_c0_g2	pvu:PhvuCp07	97.2	8.8e-274	atpB	ATP synthase CF1 beta subunit	K02112	F-type H+-transporting ATPase subunit beta	EC:3.6.3.14	pvu00190	Oxidative phosphorylation	Metabolism	Energy metabolism
TRINITY_DN27531_c0_g2	pvu:PhvuCp07	97.2	8.8e-274	atpB	ATP synthase CF1 beta subunit	K02112	F-type H+-transporting ATPase subunit beta	EC:3.6.3.14	pvu00195	Photosynthesis	Metabolism	Energy metabolism
TRINITY_DN27531_c0_g3	pvu:PhvuCp07	100	4.2e-49	atpB	ATP synthase CF1 beta subunit	K02112	F-type H+-transporting ATPase subunit beta	EC:3.6.3.14	pvu00190	Oxidative phosphorylation	Metabolism	Energy metabolism
TRINITY_DN27531_c0_g3	pvu:PhvuCp07	100	4.2e-49	atpB	ATP synthase CF1 beta subunit	K02112	F-type H+-transporting ATPase subunit beta	EC:3.6.3.14	pvu00195	Photosynthesis	Metabolism	Energy metabolism
TRINITY_DN27532_c0_g1	gra:105777197	83.7	2.8e-229	-	beta-amylase 1	K01177	beta-amylase	EC:3.2.1.2	gra00500	Starch and sucrose metabolism	Metabolism	Carbohydrate metabolism
TRINITY_DN27537_c0_g1	pda:103706747	84.8	2.3e-33	-	uncharacterized LOC103706747	K02919	large subunit ribosomal protein L36	-	pda03010	Ribosome	Genetic Information Processing	Translation
TRINITY_DN27539_c0_g1	mtr:MTR_7g116350	50.7	1e-147	-	class III chitinase	K01183	chitinase	EC:3.2.1.14	mtr00520	Amino sugar and nucleotide sugar metabolism	Metabolism	Carbohydrate metabolism
TRINITY_DN27539_c0_g3	fve:101303680	97	0	-	probable alpha	K16055	trehalose 6-phosphate synthase/phosphatase	EC:2.4.1.15 3.1.3.12	fve00500	Starch and sucrose metabolism	Metabolism	Carbohydrate metabolism
TRINITY_DN27540_c0_g1	mtr:MTR_4g063720	100	5.3e-56	-	heat shock cognate 70 kDa protein	K03283	heat shock 70kDa protein 1/8	-	mtr03040	Spliceosome	Genetic Information Processing	Transcription
TRINITY_DN27540_c0_g1	mtr:MTR_4g063720	100	5.3e-56	-	heat shock cognate 70 kDa protein	K03283	heat shock 70kDa protein 1/8	-	mtr04141	Protein processing in endoplasmic reticulum	Genetic Information Processing	Folding, sorting and degradation
TRINITY_DN27540_c0_g1	mtr:MTR_4g063720	100	5.3e-56	-	heat shock cognate 70 kDa protein	K03283	heat shock 70kDa protein 1/8	-	mtr04144	Endocytosis	Cellular Processes	Transport and catabolism
TRINITY_DN27540_c1_g1	osa:4351875	86.6	2.6e-203	-	Os12g0244100	K03283	heat shock 70kDa protein 1/8	-	osa03040	Spliceosome	Genetic Information Processing	Transcription
TRINITY_DN27540_c1_g1	osa:4351875	86.6	2.6e-203	-	Os12g0244100	K03283	heat shock 70kDa protein 1/8	-	osa04141	Protein processing in endoplasmic reticulum	Genetic Information Processing	Folding, sorting and degradation
TRINITY_DN27540_c1_g1	osa:4351875	86.6	2.6e-203	-	Os12g0244100	K03283	heat shock 70kDa protein 1/8	-	osa04144	Endocytosis	Cellular Processes	Transport and catabolism
TRINITY_DN27540_c1_g3	osa:4351875	93.8	7.2e-78	-	Os12g0244100	K03283	heat shock 70kDa protein 1/8	-	osa03040	Spliceosome	Genetic Information Processing	Transcription
TRINITY_DN27540_c1_g3	osa:4351875	93.8	7.2e-78	-	Os12g0244100	K03283	heat shock 70kDa protein 1/8	-	osa04141	Protein processing in endoplasmic reticulum	Genetic Information Processing	Folding, sorting and degradation
TRINITY_DN27540_c1_g3	osa:4351875	93.8	7.2e-78	-	Os12g0244100	K03283	heat shock 70kDa protein 1/8	-	osa04144	Endocytosis	Cellular Processes	Transport and catabolism
TRINITY_DN27540_c1_g4	eus:EUTSA_v10012864mg	94.1	2.2e-41	-	hypothetical protein	K03283	heat shock 70kDa protein 1/8	-	eus03040	Spliceosome	Genetic Information Processing	Transcription
TRINITY_DN27540_c1_g4	eus:EUTSA_v10012864mg	94.1	2.2e-41	-	hypothetical protein	K03283	heat shock 70kDa protein 1/8	-	eus04141	Protein processing in endoplasmic reticulum	Genetic Information Processing	Folding, sorting and degradation
TRINITY_DN27540_c1_g4	eus:EUTSA_v10012864mg	94.1	2.2e-41	-	hypothetical protein	K03283	heat shock 70kDa protein 1/8	-	eus04144	Endocytosis	Cellular Processes	Transport and catabolism
TRINITY_DN27540_c1_g5	jcu:105645631	77.7	1.4e-106	-	luminal-binding protein 5-like	K09490	heat shock 70kDa protein 5	-	jcu03060	Protein export	Genetic Information Processing	Folding, sorting and degradation
TRINITY_DN27540_c1_g5	jcu:105645631	77.7	1.4e-106	-	luminal-binding protein 5-like	K09490	heat shock 70kDa protein 5	-	jcu04141	Protein processing in endoplasmic reticulum	Genetic Information Processing	Folding, sorting and degradation
TRINITY_DN27541_c0_g3	fve:101293659	81.5	2.9e-105	-	probable inactive heme oxygenase 2	K00510	heme oxygenase (biliverdin-producing)	EC:1.14.14.18	fve00860	Porphyrin and chlorophyll metabolism	Metabolism	Metabolism of cofactors and vitamins
TRINITY_DN27541_c0_g6	zma:103646289	61.2	7.9e-21	-	uncharacterized LOC103646289	K02883	large subunit ribosomal protein L18e	-	zma03010	Ribosome	Genetic Information Processing	Translation
TRINITY_DN27542_c0_g1	obr:102702858	55.9	1.3e-10	-	polygalacturonase At1g48100-like	K01184	polygalacturonase	EC:3.2.1.15	obr00040	Pentose and glucuronate interconversions	Metabolism	Carbohydrate metabolism
TRINITY_DN27542_c0_g1	obr:102702858	55.9	1.3e-10	-	polygalacturonase At1g48100-like	K01184	polygalacturonase	EC:3.2.1.15	obr00500	Starch and sucrose metabolism	Metabolism	Carbohydrate metabolism
TRINITY_DN27545_c0_g1	pda:103703465	83.9	6.6e-160	-	very-long-chain enoyl-CoA reductase-like	K10258	very-long-chain enoyl-CoA reductase	EC:1.3.1.93	pda01212	Fatty acid metabolism	Metabolism	Overview
TRINITY_DN27545_c0_g1	pda:103703465	83.9	6.6e-160	-	very-long-chain enoyl-CoA reductase-like	K10258	very-long-chain enoyl-CoA reductase	EC:1.3.1.93	pda00062	Fatty acid elongation	Metabolism	Lipid metabolism
TRINITY_DN27545_c0_g1	pda:103703465	83.9	6.6e-160	-	very-long-chain enoyl-CoA reductase-like	K10258	very-long-chain enoyl-CoA reductase	EC:1.3.1.93	pda01040	Biosynthesis of unsaturated fatty acids	Metabolism	Lipid metabolism
TRINITY_DN27546_c0_g1	fve:101299755	92.3	0	CRY2	cryptochrome 2 (photolyase-like)	K12119	cryptochrome 2	-	fve04712	Circadian rhythm - plant	Organismal Systems	Environmental adaptation
TRINITY_DN27547_c1_g2	fve:101309154	74.7	4.4e-32	-	coiled-coil domain-containing protein 12	K12871	coiled-coil domain-containing protein 12	-	fve03040	Spliceosome	Genetic Information Processing	Transcription
TRINITY_DN27548_c0_g1	gra:105794028	33.2	2.1e-31	-	mitogen-activated protein kinase kinase 2-like	K04368	mitogen-activated protein kinase kinase 1	EC:2.7.12.2	gra04626	Plant-pathogen interaction	Organismal Systems	Environmental adaptation
TRINITY_DN27549_c1_g1	fve:101311193	99.4	2.2e-258	-	luminal-binding protein	K09490	heat shock 70kDa protein 5	-	fve03060	Protein export	Genetic Information Processing	Folding, sorting and degradation
TRINITY_DN27549_c1_g1	fve:101311193	99.4	2.2e-258	-	luminal-binding protein	K09490	heat shock 70kDa protein 5	-	fve04141	Protein processing in endoplasmic reticulum	Genetic Information Processing	Folding, sorting and degradation
TRINITY_DN27549_c2_g1	eus:EUTSA_v10024591mg	86.6	1.6e-110	-	hypothetical protein	K04043	molecular chaperone DnaK	-	eus03018	RNA degradation	Genetic Information Processing	Folding, sorting and degradation
TRINITY_DN27549_c2_g4	bna:106382934	56	1.4e-14	-	heat shock 70 kDa protein 10	K03283	heat shock 70kDa protein 1/8	-	bna03040	Spliceosome	Genetic Information Processing	Transcription
TRINITY_DN27549_c2_g4	bna:106382934	56	1.4e-14	-	heat shock 70 kDa protein 10	K03283	heat shock 70kDa protein 1/8	-	bna04141	Protein processing in endoplasmic reticulum	Genetic Information Processing	Folding, sorting and degradation
TRINITY_DN27549_c2_g4	bna:106382934	56	1.4e-14	-	heat shock 70 kDa protein 10	K03283	heat shock 70kDa protein 1/8	-	bna04144	Endocytosis	Cellular Processes	Transport and catabolism
TRINITY_DN27549_c2_g5	brp:103850369	93.2	3.4e-74	-	heat shock 70 kDa protein 10	K03283	heat shock 70kDa protein 1/8	-	brp03040	Spliceosome	Genetic Information Processing	Transcription
TRINITY_DN27549_c2_g5	brp:103850369	93.2	3.4e-74	-	heat shock 70 kDa protein 10	K03283	heat shock 70kDa protein 1/8	-	brp04141	Protein processing in endoplasmic reticulum	Genetic Information Processing	Folding, sorting and degradation
TRINITY_DN27549_c2_g5	brp:103850369	93.2	3.4e-74	-	heat shock 70 kDa protein 10	K03283	heat shock 70kDa protein 1/8	-	brp04144	Endocytosis	Cellular Processes	Transport and catabolism
TRINITY_DN27549_c2_g6	ath:AT5G09590	91.9	1.3e-85	MTHSC70-2	mitochondrial HSO70 2	K03283	heat shock 70kDa protein 1/8	-	ath03040	Spliceosome	Genetic Information Processing	Transcription
TRINITY_DN27549_c2_g6	ath:AT5G09590	91.9	1.3e-85	MTHSC70-2	mitochondrial HSO70 2	K03283	heat shock 70kDa protein 1/8	-	ath04141	Protein processing in endoplasmic reticulum	Genetic Information Processing	Folding, sorting and degradation
TRINITY_DN27549_c2_g6	ath:AT5G09590	91.9	1.3e-85	MTHSC70-2	mitochondrial HSO70 2	K03283	heat shock 70kDa protein 1/8	-	ath04144	Endocytosis	Cellular Processes	Transport and catabolism
TRINITY_DN27551_c0_g1	mus:103984394	35.6	4.2e-08	-	uncharacterized protein LOC103984394	K14317	nuclear pore complex protein Nup214	-	mus03013	RNA transport	Genetic Information Processing	Translation
TRINITY_DN27554_c0_g2	fve:101310202	98.2	1e-56	-	protein translation factor SUI1 homolog	K03113	translation initiation factor 1	-	fve03013	RNA transport	Genetic Information Processing	Translation
TRINITY_DN27554_c0_g5	bvg:809503	96.8	1.8e-26	nad4	NADH dehydrogenase subunit 4	K03881	NADH-ubiquinone oxidoreductase chain 4	EC:1.6.5.3	bvg00190	Oxidative phosphorylation	Metabolism	Energy metabolism
TRINITY_DN27555_c0_g1	sbi:SORBI_01g008460	51.6	1.4e-16	SORBIDRAFT_01g008460	hypothetical protein	K02183	calmodulin	-	sbi04070	Phosphatidylinositol signaling system	Environmental Information Processing	Signal transduction
TRINITY_DN27555_c0_g1	sbi:SORBI_01g008460	51.6	1.4e-16	SORBIDRAFT_01g008460	hypothetical protein	K02183	calmodulin	-	sbi04626	Plant-pathogen interaction	Organismal Systems	Environmental adaptation
TRINITY_DN27555_c0_g10	sbi:SORBI_01g008460	48.8	2.7e-17	SORBIDRAFT_01g008460	hypothetical protein	K02183	calmodulin	-	sbi04070	Phosphatidylinositol signaling system	Environmental Information Processing	Signal transduction
TRINITY_DN27555_c0_g10	sbi:SORBI_01g008460	48.8	2.7e-17	SORBIDRAFT_01g008460	hypothetical protein	K02183	calmodulin	-	sbi04626	Plant-pathogen interaction	Organismal Systems	Environmental adaptation
TRINITY_DN27555_c0_g2	fve:101314646	96.1	1.2e-209	-	mannose-1-phosphate guanyltransferase alpha	K00966	mannose-1-phosphate guanylyltransferase	EC:2.7.7.13	fve00051	Fructose and mannose metabolism	Metabolism	Carbohydrate metabolism
TRINITY_DN27555_c0_g2	fve:101314646	96.1	1.2e-209	-	mannose-1-phosphate guanyltransferase alpha	K00966	mannose-1-phosphate guanylyltransferase	EC:2.7.7.13	fve00520	Amino sugar and nucleotide sugar metabolism	Metabolism	Carbohydrate metabolism
TRINITY_DN27555_c0_g4	fve:101314646	48.9	1.2e-14	-	mannose-1-phosphate guanyltransferase alpha	K00966	mannose-1-phosphate guanylyltransferase	EC:2.7.7.13	fve00051	Fructose and mannose metabolism	Metabolism	Carbohydrate metabolism
TRINITY_DN27555_c0_g4	fve:101314646	48.9	1.2e-14	-	mannose-1-phosphate guanyltransferase alpha	K00966	mannose-1-phosphate guanylyltransferase	EC:2.7.7.13	fve00520	Amino sugar and nucleotide sugar metabolism	Metabolism	Carbohydrate metabolism
TRINITY_DN27555_c0_g6	sbi:SORBI_01g008460	51.6	8.6e-16	SORBIDRAFT_01g008460	hypothetical protein	K02183	calmodulin	-	sbi04070	Phosphatidylinositol signaling system	Environmental Information Processing	Signal transduction
TRINITY_DN27555_c0_g6	sbi:SORBI_01g008460	51.6	8.6e-16	SORBIDRAFT_01g008460	hypothetical protein	K02183	calmodulin	-	sbi04626	Plant-pathogen interaction	Organismal Systems	Environmental adaptation
TRINITY_DN27555_c0_g7	sbi:SORBI_01g008460	52.9	2.2e-16	SORBIDRAFT_01g008460	hypothetical protein	K02183	calmodulin	-	sbi04070	Phosphatidylinositol signaling system	Environmental Information Processing	Signal transduction
TRINITY_DN27555_c0_g7	sbi:SORBI_01g008460	52.9	2.2e-16	SORBIDRAFT_01g008460	hypothetical protein	K02183	calmodulin	-	sbi04626	Plant-pathogen interaction	Organismal Systems	Environmental adaptation
TRINITY_DN27557_c0_g1	fve:101296868	90.4	1.8e-119	-	palmitoyl-protein thioesterase 1-like	K01074	palmitoyl-protein thioesterase	EC:3.1.2.22	fve01212	Fatty acid metabolism	Metabolism	Overview
TRINITY_DN27557_c0_g1	fve:101296868	90.4	1.8e-119	-	palmitoyl-protein thioesterase 1-like	K01074	palmitoyl-protein thioesterase	EC:3.1.2.22	fve00062	Fatty acid elongation	Metabolism	Lipid metabolism
TRINITY_DN27557_c0_g2	nnu:104602841	48.7	8e-260	-	uncharacterized LOC104602841	K13024	inositol-hexakisphosphate/diphosphoinositol-pentakisphosphate 1-kinase	EC:2.7.4.24	nnu04070	Phosphatidylinositol signaling system	Environmental Information Processing	Signal transduction
TRINITY_DN27557_c0_g3	zma:100273527	47.6	4.2e-56	GRMZM2G047255	pherophorin like protein	K05747	Wiskott-Aldrich syndrome protein	-	zma04144	Endocytosis	Cellular Processes	Transport and catabolism
TRINITY_DN27557_c0_g5	fve:101295525	70.1	1.4e-45	-	RNA-binding protein NOB1	K11883	RNA-binding protein NOB1	-	fve03008	Ribosome biogenesis in eukaryotes	Genetic Information Processing	Translation
TRINITY_DN27559_c0_g6	eus:EUTSA_v10015486mg	51.8	1.8e-06	-	hypothetical protein	K12135	zinc finger protein CONSTANS	-	eus04712	Circadian rhythm - plant	Organismal Systems	Environmental adaptation
TRINITY_DN27560_c0_g1	mus:103984394	57.1	1.8e-20	-	uncharacterized protein LOC103984394	K14317	nuclear pore complex protein Nup214	-	mus03013	RNA transport	Genetic Information Processing	Translation
TRINITY_DN27561_c0_g6	pop:POPTR_0008s12000g	91.1	3.3e-77	POPTRDRAFT_766070	hypothetical protein	K02876	large subunit ribosomal protein L15	-	pop03010	Ribosome	Genetic Information Processing	Translation
TRINITY_DN27563_c1_g1	bvg:104897507	63.4	1.5e-59	-	serine/threonine-protein kinase PBS1	K13430	serine/threonine-protein kinase PBS1	EC:2.7.11.1	bvg04626	Plant-pathogen interaction	Organismal Systems	Environmental adaptation
TRINITY_DN27563_c1_g3	sind:105170370	92.6	9.4e-119	-	proliferating cell nuclear antigen	K04802	proliferating cell nuclear antigen	-	sind03030	DNA replication	Genetic Information Processing	Replication and repair
TRINITY_DN27563_c1_g3	sind:105170370	92.6	9.4e-119	-	proliferating cell nuclear antigen	K04802	proliferating cell nuclear antigen	-	sind03410	Base excision repair	Genetic Information Processing	Replication and repair
TRINITY_DN27563_c1_g3	sind:105170370	92.6	9.4e-119	-	proliferating cell nuclear antigen	K04802	proliferating cell nuclear antigen	-	sind03420	Nucleotide excision repair	Genetic Information Processing	Replication and repair
TRINITY_DN27563_c1_g3	sind:105170370	92.6	9.4e-119	-	proliferating cell nuclear antigen	K04802	proliferating cell nuclear antigen	-	sind03430	Mismatch repair	Genetic Information Processing	Replication and repair
TRINITY_DN27563_c1_g4	tcc:TCM_041691	98.9	2e-45	-	Proliferating cell nuclear antigen	K04802	proliferating cell nuclear antigen	-	tcc03030	DNA replication	Genetic Information Processing	Replication and repair
TRINITY_DN27563_c1_g4	tcc:TCM_041691	98.9	2e-45	-	Proliferating cell nuclear antigen	K04802	proliferating cell nuclear antigen	-	tcc03410	Base excision repair	Genetic Information Processing	Replication and repair
TRINITY_DN27563_c1_g4	tcc:TCM_041691	98.9	2e-45	-	Proliferating cell nuclear antigen	K04802	proliferating cell nuclear antigen	-	tcc03420	Nucleotide excision repair	Genetic Information Processing	Replication and repair
TRINITY_DN27563_c1_g4	tcc:TCM_041691	98.9	2e-45	-	Proliferating cell nuclear antigen	K04802	proliferating cell nuclear antigen	-	tcc03430	Mismatch repair	Genetic Information Processing	Replication and repair
TRINITY_DN27564_c0_g1	fve:101303112	95.1	1.1e-179	-	putative GDP-L-fucose synthase 2	K02377	GDP-L-fucose synthase	EC:1.1.1.271	fve00051	Fructose and mannose metabolism	Metabolism	Carbohydrate metabolism
TRINITY_DN27564_c0_g1	fve:101303112	95.1	1.1e-179	-	putative GDP-L-fucose synthase 2	K02377	GDP-L-fucose synthase	EC:1.1.1.271	fve00520	Amino sugar and nucleotide sugar metabolism	Metabolism	Carbohydrate metabolism
TRINITY_DN27565_c2_g1	nnu:104610645	96.9	1.8e-30	-	eukaryotic translation initiation factor 2 subunit gamma-like	K03242	translation initiation factor 2 subunit 3	-	nnu03013	RNA transport	Genetic Information Processing	Translation
TRINITY_DN27565_c2_g2	mus:103994959	98.5	4.6e-70	-	eukaryotic translation initiation factor 2 subunit gamma-like	K03242	translation initiation factor 2 subunit 3	-	mus03013	RNA transport	Genetic Information Processing	Translation
TRINITY_DN27565_c2_g4	obr:102721129	36.8	2.8e-09	-	2-hydroxyacyl-CoA lyase-like	K12261	2-hydroxyacyl-CoA lyase 1	EC:4.1.-.-	obr04146	Peroxisome	Cellular Processes	Transport and catabolism
TRINITY_DN27565_c2_g5	atr:18445961	96.2	3.3e-55	-	eukaryotic translation initiation factor 2 subunit 3	K03242	translation initiation factor 2 subunit 3	-	atr03013	RNA transport	Genetic Information Processing	Translation
TRINITY_DN27565_c2_g6	mus:103994959	95.5	9.4e-232	-	eukaryotic translation initiation factor 2 subunit gamma-like	K03242	translation initiation factor 2 subunit 3	-	mus03013	RNA transport	Genetic Information Processing	Translation
TRINITY_DN27565_c2_g7	pda:103708589	97.3	6.4e-57	-	eukaryotic translation initiation factor 2 subunit 3-like	K03242	translation initiation factor 2 subunit 3	-	pda03013	RNA transport	Genetic Information Processing	Translation
TRINITY_DN27566_c0_g2	fve:101292991	92.6	3.5e-194	-	aspartate-semialdehyde dehydrogenase	K00133	aspartate-semialdehyde dehydrogenase	EC:1.2.1.11	fve01210	2-Oxocarboxylic acid metabolism	Metabolism	Overview
TRINITY_DN27566_c0_g2	fve:101292991	92.6	3.5e-194	-	aspartate-semialdehyde dehydrogenase	K00133	aspartate-semialdehyde dehydrogenase	EC:1.2.1.11	fve01230	Biosynthesis of amino acids	Metabolism	Overview
TRINITY_DN27566_c0_g2	fve:101292991	92.6	3.5e-194	-	aspartate-semialdehyde dehydrogenase	K00133	aspartate-semialdehyde dehydrogenase	EC:1.2.1.11	fve00260	Glycine, serine and threonine metabolism	Metabolism	Amino acid metabolism
TRINITY_DN27566_c0_g2	fve:101292991	92.6	3.5e-194	-	aspartate-semialdehyde dehydrogenase	K00133	aspartate-semialdehyde dehydrogenase	EC:1.2.1.11	fve00270	Cysteine and methionine metabolism	Metabolism	Amino acid metabolism
TRINITY_DN27566_c0_g2	fve:101292991	92.6	3.5e-194	-	aspartate-semialdehyde dehydrogenase	K00133	aspartate-semialdehyde dehydrogenase	EC:1.2.1.11	fve00300	Lysine biosynthesis	Metabolism	Amino acid metabolism
TRINITY_DN27566_c0_g2	fve:101292991	92.6	3.5e-194	-	aspartate-semialdehyde dehydrogenase	K00133	aspartate-semialdehyde dehydrogenase	EC:1.2.1.11	fve00261	Monobactam biosynthesis	Metabolism	Biosynthesis of other secondary metabolites
TRINITY_DN27566_c0_g5	vra:106774344	47.2	6.8e-10	-	RPM1-interacting protein 4-like	K13456	RPM1-interacting protein 4	-	vra04626	Plant-pathogen interaction	Organismal Systems	Environmental adaptation
TRINITY_DN27566_c0_g7	aly:ARALYDRAFT_312479	55.5	5.4e-78	-	F10B6.22	K00133	aspartate-semialdehyde dehydrogenase	EC:1.2.1.11	aly01210	2-Oxocarboxylic acid metabolism	Metabolism	Overview
TRINITY_DN27566_c0_g7	aly:ARALYDRAFT_312479	55.5	5.4e-78	-	F10B6.22	K00133	aspartate-semialdehyde dehydrogenase	EC:1.2.1.11	aly01230	Biosynthesis of amino acids	Metabolism	Overview
TRINITY_DN27566_c0_g7	aly:ARALYDRAFT_312479	55.5	5.4e-78	-	F10B6.22	K00133	aspartate-semialdehyde dehydrogenase	EC:1.2.1.11	aly00260	Glycine, serine and threonine metabolism	Metabolism	Amino acid metabolism
TRINITY_DN27566_c0_g7	aly:ARALYDRAFT_312479	55.5	5.4e-78	-	F10B6.22	K00133	aspartate-semialdehyde dehydrogenase	EC:1.2.1.11	aly00270	Cysteine and methionine metabolism	Metabolism	Amino acid metabolism
TRINITY_DN27566_c0_g7	aly:ARALYDRAFT_312479	55.5	5.4e-78	-	F10B6.22	K00133	aspartate-semialdehyde dehydrogenase	EC:1.2.1.11	aly00300	Lysine biosynthesis	Metabolism	Amino acid metabolism
TRINITY_DN27566_c0_g7	aly:ARALYDRAFT_312479	55.5	5.4e-78	-	F10B6.22	K00133	aspartate-semialdehyde dehydrogenase	EC:1.2.1.11	aly00261	Monobactam biosynthesis	Metabolism	Biosynthesis of other secondary metabolites
TRINITY_DN27569_c0_g1	bpg:Bathy18g00460	45.2	1.5e-09	-	phosphopantothenoylcysteine decarboxylase	K01598	phosphopantothenoylcysteine decarboxylase	EC:4.1.1.36	bpg00770	Pantothenate and CoA biosynthesis	Metabolism	Metabolism of cofactors and vitamins
TRINITY_DN27571_c1_g2	fve:101300760	95.9	3.3e-85	-	chlorophyll a-b binding protein CP29.3	K08915	light-harvesting complex II chlorophyll a/b binding protein 4	-	fve00196	Photosynthesis - antenna proteins	Metabolism	Energy metabolism
TRINITY_DN27571_c1_g9	csv:101217830	35.3	7.9e-20	-	3-epi-6-deoxocathasterone 23-monooxygenase-like	K12638	3-epi-6-deoxocathasterone 23-monooxygenase	EC:1.14.13.112	csv00905	Brassinosteroid biosynthesis	Metabolism	Metabolism of terpenoids and polyketides
TRINITY_DN27572_c0_g1	pper:PRUPE_ppa003401mg	35.2	8.1e-10	-	hypothetical protein	K01756	adenylosuccinate lyase	EC:4.3.2.2	pper00230	Purine metabolism	Metabolism	Nucleotide metabolism
TRINITY_DN27572_c0_g1	pper:PRUPE_ppa003401mg	35.2	8.1e-10	-	hypothetical protein	K01756	adenylosuccinate lyase	EC:4.3.2.2	pper00250	Alanine, aspartate and glutamate metabolism	Metabolism	Amino acid metabolism
TRINITY_DN27573_c0_g1	fve:101300616	90	2.3e-183	-	serine/threonine-protein phosphatase PP2A catalytic subunit	K04382	serine/threonine-protein phosphatase 2A catalytic subunit	EC:3.1.3.16	fve03015	mRNA surveillance pathway	Genetic Information Processing	Translation
TRINITY_DN27573_c0_g2	atr:18432994	93.8	9.3e-30	-	serine/threonine-protein phosphatase PP2A-1 catalytic subunit	K04382	serine/threonine-protein phosphatase 2A catalytic subunit	EC:3.1.3.16	atr03015	mRNA surveillance pathway	Genetic Information Processing	Translation
TRINITY_DN27574_c0_g1	fve:101291943	97.2	2.9e-213	-	enoyl-[acyl-carrier-protein] reductase [NADH] 1	K00208	enoyl-[acyl-carrier protein] reductase I	EC:1.3.1.9 1.3.1.10	fve01212	Fatty acid metabolism	Metabolism	Overview
TRINITY_DN27574_c0_g1	fve:101291943	97.2	2.9e-213	-	enoyl-[acyl-carrier-protein] reductase [NADH] 1	K00208	enoyl-[acyl-carrier protein] reductase I	EC:1.3.1.9 1.3.1.10	fve00061	Fatty acid biosynthesis	Metabolism	Lipid metabolism
TRINITY_DN27574_c0_g1	fve:101291943	97.2	2.9e-213	-	enoyl-[acyl-carrier-protein] reductase [NADH] 1	K00208	enoyl-[acyl-carrier protein] reductase I	EC:1.3.1.9 1.3.1.10	fve00780	Biotin metabolism	Metabolism	Metabolism of cofactors and vitamins
TRINITY_DN27574_c1_g2	tcc:TCM_040401	54.1	5.7e-10	-	NAD(P)-binding Rossmann-fold superfamily protein isoform 1	K00208	enoyl-[acyl-carrier protein] reductase I	EC:1.3.1.9 1.3.1.10	tcc01212	Fatty acid metabolism	Metabolism	Overview
TRINITY_DN27574_c1_g2	tcc:TCM_040401	54.1	5.7e-10	-	NAD(P)-binding Rossmann-fold superfamily protein isoform 1	K00208	enoyl-[acyl-carrier protein] reductase I	EC:1.3.1.9 1.3.1.10	tcc00061	Fatty acid biosynthesis	Metabolism	Lipid metabolism
TRINITY_DN27574_c1_g2	tcc:TCM_040401	54.1	5.7e-10	-	NAD(P)-binding Rossmann-fold superfamily protein isoform 1	K00208	enoyl-[acyl-carrier protein] reductase I	EC:1.3.1.9 1.3.1.10	tcc00780	Biotin metabolism	Metabolism	Metabolism of cofactors and vitamins
TRINITY_DN27575_c0_g1	smo:SELMODRAFT_130409	35.8	3.4e-13	-	hypothetical protein	K09903	uridylate kinase	EC:2.7.4.22	smo00240	Pyrimidine metabolism	Metabolism	Nucleotide metabolism
TRINITY_DN27575_c0_g10	bna:106442849	73.2	1.1e-38	-	ubiquitin-like modifier-activating enzyme ATG7	K10686	ubiquitin-activating enzyme E1 C	EC:6.2.1.45	bna04120	Ubiquitin mediated proteolysis	Genetic Information Processing	Folding, sorting and degradation
TRINITY_DN27575_c0_g3	thj:104825639	38.3	7.8e-49	-	serine/threonine-protein kinase PBS1	K13430	serine/threonine-protein kinase PBS1	EC:2.7.11.1	thj04626	Plant-pathogen interaction	Organismal Systems	Environmental adaptation
TRINITY_DN27575_c0_g8	bna:106442849	67.6	5.5e-36	-	ubiquitin-like modifier-activating enzyme ATG7	K10686	ubiquitin-activating enzyme E1 C	EC:6.2.1.45	bna04120	Ubiquitin mediated proteolysis	Genetic Information Processing	Folding, sorting and degradation
TRINITY_DN27575_c1_g1	sbi:SORBI_07g025790	43.6	1e-16	SORBIDRAFT_07g025790	hypothetical protein	K13429	chitin elicitor receptor kinase 1	-	sbi04626	Plant-pathogen interaction	Organismal Systems	Environmental adaptation
TRINITY_DN27576_c0_g2	pvu:PHAVU_003G204000g	51.3	1.1e-159	-	hypothetical protein	K00276	primary-amine oxidase	EC:1.4.3.21	pvu00260	Glycine, serine and threonine metabolism	Metabolism	Amino acid metabolism
TRINITY_DN27576_c0_g2	pvu:PHAVU_003G204000g	51.3	1.1e-159	-	hypothetical protein	K00276	primary-amine oxidase	EC:1.4.3.21	pvu00350	Tyrosine metabolism	Metabolism	Amino acid metabolism
TRINITY_DN27576_c0_g2	pvu:PHAVU_003G204000g	51.3	1.1e-159	-	hypothetical protein	K00276	primary-amine oxidase	EC:1.4.3.21	pvu00360	Phenylalanine metabolism	Metabolism	Amino acid metabolism
TRINITY_DN27576_c0_g2	pvu:PHAVU_003G204000g	51.3	1.1e-159	-	hypothetical protein	K00276	primary-amine oxidase	EC:1.4.3.21	pvu00410	beta-Alanine metabolism	Metabolism	Metabolism of other amino acids
TRINITY_DN27576_c0_g2	pvu:PHAVU_003G204000g	51.3	1.1e-159	-	hypothetical protein	K00276	primary-amine oxidase	EC:1.4.3.21	pvu00950	Isoquinoline alkaloid biosynthesis	Metabolism	Biosynthesis of other secondary metabolites
TRINITY_DN27576_c0_g2	pvu:PHAVU_003G204000g	51.3	1.1e-159	-	hypothetical protein	K00276	primary-amine oxidase	EC:1.4.3.21	pvu00960	Tropane, piperidine and pyridine alkaloid biosynthesis	Metabolism	Biosynthesis of other secondary metabolites
TRINITY_DN27577_c1_g5	fve:101310143	94.6	2e-49	-	V-type proton ATPase subunit G	K02152	V-type H+-transporting ATPase subunit G	-	fve00190	Oxidative phosphorylation	Metabolism	Energy metabolism
TRINITY_DN27577_c1_g5	fve:101310143	94.6	2e-49	-	V-type proton ATPase subunit G	K02152	V-type H+-transporting ATPase subunit G	-	fve04145	Phagosome	Cellular Processes	Transport and catabolism
TRINITY_DN27577_c1_g6	nnu:104598897	49.8	1.1e-141	-	pectinesterase-like	K01051	pectinesterase	EC:3.1.1.11	nnu00040	Pentose and glucuronate interconversions	Metabolism	Carbohydrate metabolism
TRINITY_DN27577_c1_g6	nnu:104598897	49.8	1.1e-141	-	pectinesterase-like	K01051	pectinesterase	EC:3.1.1.11	nnu00500	Starch and sucrose metabolism	Metabolism	Carbohydrate metabolism
TRINITY_DN27579_c0_g1	brp:103835926	27.6	3.5e-13	-	cyclin-dependent kinase D-3	K02202	cyclin-dependent kinase 7	EC:2.7.11.22 2.7.11.23	brp03022	Basal transcription factors	Genetic Information Processing	Transcription
TRINITY_DN27579_c0_g1	brp:103835926	27.6	3.5e-13	-	cyclin-dependent kinase D-3	K02202	cyclin-dependent kinase 7	EC:2.7.11.22 2.7.11.23	brp03420	Nucleotide excision repair	Genetic Information Processing	Replication and repair
TRINITY_DN2757_c0_g1	gmx:100788180	98.1	4.3e-52	-	lycopene epsilon cyclase	K06444	lycopene epsilon-cyclase	EC:5.5.1.18	gmx00906	Carotenoid biosynthesis	Metabolism	Metabolism of terpenoids and polyketides
TRINITY_DN27580_c0_g10	gsl:Gasu_40610	56.9	3.5e-28	-	[pt] F-type H+-transporting ATPase subunit a	K02108	F-type H+-transporting ATPase subunit a	-	gsl00190	Oxidative phosphorylation	Metabolism	Energy metabolism
TRINITY_DN27580_c0_g10	gsl:Gasu_40610	56.9	3.5e-28	-	[pt] F-type H+-transporting ATPase subunit a	K02108	F-type H+-transporting ATPase subunit a	-	gsl00195	Photosynthesis	Metabolism	Energy metabolism
TRINITY_DN27580_c0_g11	fve:10251485	95.1	6.4e-24	psbK	photosystem II protein K	K02712	photosystem II PsbK protein	-	fve00195	Photosynthesis	Metabolism	Energy metabolism
TRINITY_DN27580_c0_g4	gsl:Gasu_40610	55.1	2.9e-47	-	[pt] F-type H+-transporting ATPase subunit a	K02108	F-type H+-transporting ATPase subunit a	-	gsl00190	Oxidative phosphorylation	Metabolism	Energy metabolism
TRINITY_DN27580_c0_g4	gsl:Gasu_40610	55.1	2.9e-47	-	[pt] F-type H+-transporting ATPase subunit a	K02108	F-type H+-transporting ATPase subunit a	-	gsl00195	Photosynthesis	Metabolism	Energy metabolism
TRINITY_DN27581_c0_g1	fve:101308034	91.7	3.2e-77	-	calmodulin-5/6/7/8-like	K02183	calmodulin	-	fve04070	Phosphatidylinositol signaling system	Environmental Information Processing	Signal transduction
TRINITY_DN27581_c0_g1	fve:101308034	91.7	3.2e-77	-	calmodulin-5/6/7/8-like	K02183	calmodulin	-	fve04626	Plant-pathogen interaction	Organismal Systems	Environmental adaptation
TRINITY_DN27581_c0_g10	sbi:SORBI_02g043510	91.9	3.1e-53	SORBIDRAFT_02g043510	hypothetical protein	K02183	calmodulin	-	sbi04070	Phosphatidylinositol signaling system	Environmental Information Processing	Signal transduction
TRINITY_DN27581_c0_g10	sbi:SORBI_02g043510	91.9	3.1e-53	SORBIDRAFT_02g043510	hypothetical protein	K02183	calmodulin	-	sbi04626	Plant-pathogen interaction	Organismal Systems	Environmental adaptation
TRINITY_DN27581_c0_g11	mtr:MTR_7g087610	96.4	1e-07	-	EF hand calcium-binding family protein	K02183	calmodulin	-	mtr04070	Phosphatidylinositol signaling system	Environmental Information Processing	Signal transduction
TRINITY_DN27581_c0_g11	mtr:MTR_7g087610	96.4	1e-07	-	EF hand calcium-binding family protein	K02183	calmodulin	-	mtr04626	Plant-pathogen interaction	Organismal Systems	Environmental adaptation
TRINITY_DN27581_c0_g2	gra:105790042	85.2	6.9e-40	-	calmodulin-like	K02183	calmodulin	-	gra04070	Phosphatidylinositol signaling system	Environmental Information Processing	Signal transduction
TRINITY_DN27581_c0_g2	gra:105790042	85.2	6.9e-40	-	calmodulin-like	K02183	calmodulin	-	gra04626	Plant-pathogen interaction	Organismal Systems	Environmental adaptation
TRINITY_DN27581_c0_g3	obr:102721003	93.3	3.4e-48	-	UPF0483 protein AGAP003155-like	K02183	calmodulin	-	obr04070	Phosphatidylinositol signaling system	Environmental Information Processing	Signal transduction
TRINITY_DN27581_c0_g3	obr:102721003	93.3	3.4e-48	-	UPF0483 protein AGAP003155-like	K02183	calmodulin	-	obr04626	Plant-pathogen interaction	Organismal Systems	Environmental adaptation
TRINITY_DN27581_c0_g6	fve:101308330	53.6	3.8e-19	-	calmodulin-like	K02183	calmodulin	-	fve04070	Phosphatidylinositol signaling system	Environmental Information Processing	Signal transduction
TRINITY_DN27581_c0_g6	fve:101308330	53.6	3.8e-19	-	calmodulin-like	K02183	calmodulin	-	fve04626	Plant-pathogen interaction	Organismal Systems	Environmental adaptation
TRINITY_DN27581_c0_g9	pper:PRUPE_ppa012070mg	99.3	1.6e-54	-	hypothetical protein	K02183	calmodulin	-	pper04070	Phosphatidylinositol signaling system	Environmental Information Processing	Signal transduction
TRINITY_DN27581_c0_g9	pper:PRUPE_ppa012070mg	99.3	1.6e-54	-	hypothetical protein	K02183	calmodulin	-	pper04626	Plant-pathogen interaction	Organismal Systems	Environmental adaptation
TRINITY_DN27582_c1_g12	fve:101312728	94.1	5.7e-230	-	uncharacterized LOC101312728	K00737	beta-1,4-mannosyl-glycoprotein beta-1,4-N-acetylglucosaminyltransferase	EC:2.4.1.144	fve00510	N-Glycan biosynthesis	Metabolism	Glycan biosynthesis and metabolism
TRINITY_DN27583_c0_g2	sind:105166581	43.3	1.8e-23	-	uncharacterized LOC105166581	K00655	1-acyl-sn-glycerol-3-phosphate acyltransferase	EC:2.3.1.51	sind00561	Glycerolipid metabolism	Metabolism	Lipid metabolism
TRINITY_DN27583_c0_g2	sind:105166581	43.3	1.8e-23	-	uncharacterized LOC105166581	K00655	1-acyl-sn-glycerol-3-phosphate acyltransferase	EC:2.3.1.51	sind00564	Glycerophospholipid metabolism	Metabolism	Lipid metabolism
TRINITY_DN27583_c0_g6	mdm:103449447	32.3	2.2e-40	-	uncharacterized LOC103449447	K14400	pre-mRNA cleavage complex 2 protein Pcf11	-	mdm03015	mRNA surveillance pathway	Genetic Information Processing	Translation
TRINITY_DN27583_c0_g8	pmum:103327405	95.7	1.9e-15	-	60S ribosomal protein L7-2	K02937	large subunit ribosomal protein L7e	-	pmum03010	Ribosome	Genetic Information Processing	Translation
TRINITY_DN27583_c0_g9	thj:104808371	34.6	6.5e-85	-	uncharacterized LOC104808371	K12447	UDP-sugar pyrophosphorylase	EC:2.7.7.64	thj00040	Pentose and glucuronate interconversions	Metabolism	Carbohydrate metabolism
TRINITY_DN27583_c0_g9	thj:104808371	34.6	6.5e-85	-	uncharacterized LOC104808371	K12447	UDP-sugar pyrophosphorylase	EC:2.7.7.64	thj00052	Galactose metabolism	Metabolism	Carbohydrate metabolism
TRINITY_DN27583_c0_g9	thj:104808371	34.6	6.5e-85	-	uncharacterized LOC104808371	K12447	UDP-sugar pyrophosphorylase	EC:2.7.7.64	thj00053	Ascorbate and aldarate metabolism	Metabolism	Carbohydrate metabolism
TRINITY_DN27583_c0_g9	thj:104808371	34.6	6.5e-85	-	uncharacterized LOC104808371	K12447	UDP-sugar pyrophosphorylase	EC:2.7.7.64	thj00520	Amino sugar and nucleotide sugar metabolism	Metabolism	Carbohydrate metabolism
TRINITY_DN27586_c0_g2	brp:103847542	34.8	3e-34	-	clathrin interactor EPSIN 1	K12471	epsin	-	brp04144	Endocytosis	Cellular Processes	Transport and catabolism
TRINITY_DN27587_c0_g1	jcu:105649658	32.5	4.4e-23	-	uncharacterized LOC105649658	K01365	cathepsin L	EC:3.4.22.15	jcu04145	Phagosome	Cellular Processes	Transport and catabolism
TRINITY_DN27587_c0_g2	tcc:TCM_029716	37.2	2.8e-09	-	Maternal effect embryo arrest 18	K01365	cathepsin L	EC:3.4.22.15	tcc04145	Phagosome	Cellular Processes	Transport and catabolism
TRINITY_DN27587_c0_g3	jcu:105649658	65.3	7.5e-90	-	uncharacterized LOC105649658	K01365	cathepsin L	EC:3.4.22.15	jcu04145	Phagosome	Cellular Processes	Transport and catabolism
TRINITY_DN27587_c0_g4	sly:101251741	57.7	1.2e-102	-	uncharacterized LOC101251741	K01365	cathepsin L	EC:3.4.22.15	sly04145	Phagosome	Cellular Processes	Transport and catabolism
TRINITY_DN27588_c0_g2	sita:101776988	46.9	3.8e-11	-	pectinesterase QRT1	K01051	pectinesterase	EC:3.1.1.11	sita00040	Pentose and glucuronate interconversions	Metabolism	Carbohydrate metabolism
TRINITY_DN27588_c0_g2	sita:101776988	46.9	3.8e-11	-	pectinesterase QRT1	K01051	pectinesterase	EC:3.1.1.11	sita00500	Starch and sucrose metabolism	Metabolism	Carbohydrate metabolism
TRINITY_DN27588_c0_g6	ath:AT1G16780	84.4	4.2e-39	VHP2;2	type II H+-Ppase VHP2;2	K01507	inorganic pyrophosphatase	EC:3.6.1.1	ath00190	Oxidative phosphorylation	Metabolism	Energy metabolism
TRINITY_DN27590_c2_g1	tcc:TCM_042683	44	9.9e-114	-	Disease resistance protein RPP8	K01930	folylpolyglutamate synthase	EC:6.3.2.17	tcc00790	Folate biosynthesis	Metabolism	Metabolism of cofactors and vitamins
TRINITY_DN27590_c2_g3	gra:105787506	35.7	6.7e-134	-	putative disease resistance protein At1g50180	K13457	disease resistance protein RPM1	-	gra04626	Plant-pathogen interaction	Organismal Systems	Environmental adaptation
TRINITY_DN27590_c2_g5	tcc:TCM_042683	40.3	4.7e-102	-	Disease resistance protein RPP8	K01930	folylpolyglutamate synthase	EC:6.3.2.17	tcc00790	Folate biosynthesis	Metabolism	Metabolism of cofactors and vitamins
TRINITY_DN27590_c2_g6	tcc:TCM_047010	40.3	1.8e-24	-	Disease resistance protein family	K13457	disease resistance protein RPM1	-	tcc04626	Plant-pathogen interaction	Organismal Systems	Environmental adaptation
TRINITY_DN27591_c0_g1	fve:101307868	94.2	6.1e-102	-	ubiquitin thioesterase OTU1	K13719	ubiquitin thioesterase OTU1	EC:3.1.2.-	fve04141	Protein processing in endoplasmic reticulum	Genetic Information Processing	Folding, sorting and degradation
TRINITY_DN27591_c0_g3	pop:POPTR_0001s42650g	87.5	1.6e-106	POPTRDRAFT_829919	OTU-like cysteine protease family protein	K13719	ubiquitin thioesterase OTU1	EC:3.1.2.-	pop04141	Protein processing in endoplasmic reticulum	Genetic Information Processing	Folding, sorting and degradation
TRINITY_DN27592_c0_g1	rcu:RCOM_1211520	48.9	2.3e-79	-	A/G-specific adenine glycosylase muty	K03575	A/G-specific adenine glycosylase	EC:3.2.2.-	rcu03410	Base excision repair	Genetic Information Processing	Replication and repair
TRINITY_DN27592_c0_g2	rcu:RCOM_1211520	47.4	1.2e-53	-	A/G-specific adenine glycosylase muty	K03575	A/G-specific adenine glycosylase	EC:3.2.2.-	rcu03410	Base excision repair	Genetic Information Processing	Replication and repair
TRINITY_DN27592_c0_g3	rcu:RCOM_1211520	50	4.9e-12	-	A/G-specific adenine glycosylase muty	K03575	A/G-specific adenine glycosylase	EC:3.2.2.-	rcu03410	Base excision repair	Genetic Information Processing	Replication and repair
TRINITY_DN27592_c0_g4	rcu:RCOM_1211520	51.6	1.3e-85	-	A/G-specific adenine glycosylase muty	K03575	A/G-specific adenine glycosylase	EC:3.2.2.-	rcu03410	Base excision repair	Genetic Information Processing	Replication and repair
TRINITY_DN27593_c1_g1	sly:101253806	70	1.5e-06	-	uncharacterized LOC101253806	K01652	acetolactate synthase I/II/III large subunit	EC:2.2.1.6	sly01210	2-Oxocarboxylic acid metabolism	Metabolism	Overview
TRINITY_DN27593_c1_g1	sly:101253806	70	1.5e-06	-	uncharacterized LOC101253806	K01652	acetolactate synthase I/II/III large subunit	EC:2.2.1.6	sly01230	Biosynthesis of amino acids	Metabolism	Overview
TRINITY_DN27593_c1_g1	sly:101253806	70	1.5e-06	-	uncharacterized LOC101253806	K01652	acetolactate synthase I/II/III large subunit	EC:2.2.1.6	sly00650	Butanoate metabolism	Metabolism	Carbohydrate metabolism
TRINITY_DN27593_c1_g1	sly:101253806	70	1.5e-06	-	uncharacterized LOC101253806	K01652	acetolactate synthase I/II/III large subunit	EC:2.2.1.6	sly00660	C5-Branched dibasic acid metabolism	Metabolism	Carbohydrate metabolism
TRINITY_DN27593_c1_g1	sly:101253806	70	1.5e-06	-	uncharacterized LOC101253806	K01652	acetolactate synthase I/II/III large subunit	EC:2.2.1.6	sly00290	Valine, leucine and isoleucine biosynthesis	Metabolism	Amino acid metabolism
TRINITY_DN27593_c1_g1	sly:101253806	70	1.5e-06	-	uncharacterized LOC101253806	K01652	acetolactate synthase I/II/III large subunit	EC:2.2.1.6	sly00770	Pantothenate and CoA biosynthesis	Metabolism	Metabolism of cofactors and vitamins
TRINITY_DN27596_c0_g1	fve:101292567	85.4	8.4e-33	-	glutamyl-tRNA(Gln) amidotransferase subunit C	K02435	aspartyl-tRNA(Asn)/glutamyl-tRNA(Gln) amidotransferase subunit C	EC:6.3.5.6 6.3.5.7	fve00970	Aminoacyl-tRNA biosynthesis	Genetic Information Processing	Translation
TRINITY_DN27596_c0_g3	mdm:103410768	54.2	7e-21	-	syntaxin-112-like	K08486	syntaxin 1B/2/3	-	mdm04130	SNARE interactions in vesicular transport	Genetic Information Processing	Folding, sorting and degradation
TRINITY_DN27596_c0_g5	nnu:104609601	33.1	1.1e-46	-	pentatricopeptide repeat-containing protein At2g04860	K01176	alpha-amylase	EC:3.2.1.1	nnu00500	Starch and sucrose metabolism	Metabolism	Carbohydrate metabolism
TRINITY_DN27599_c0_g1	cit:102616036	79.2	4.3e-52	-	phosphoenolpyruvate carboxylase 4-like	K01595	phosphoenolpyruvate carboxylase	EC:4.1.1.31	cit01200	Carbon metabolism	Metabolism	Overview
TRINITY_DN27599_c0_g1	cit:102616036	79.2	4.3e-52	-	phosphoenolpyruvate carboxylase 4-like	K01595	phosphoenolpyruvate carboxylase	EC:4.1.1.31	cit00620	Pyruvate metabolism	Metabolism	Carbohydrate metabolism
TRINITY_DN27599_c0_g1	cit:102616036	79.2	4.3e-52	-	phosphoenolpyruvate carboxylase 4-like	K01595	phosphoenolpyruvate carboxylase	EC:4.1.1.31	cit00710	Carbon fixation in photosynthetic organisms	Metabolism	Energy metabolism
TRINITY_DN27601_c0_g2	fve:101298400	91.4	3.9e-104	-	12-oxophytodienoate reductase 2-like	K05894	12-oxophytodienoic acid reductase	EC:1.3.1.42	fve00592	alpha-Linolenic acid metabolism	Metabolism	Lipid metabolism
TRINITY_DN27603_c0_g1	gsl:Gasu_13240	29.6	5.8e-34	-	molecular chaperone DnaJ	K09503	DnaJ homolog subfamily A member 2	-	gsl04141	Protein processing in endoplasmic reticulum	Genetic Information Processing	Folding, sorting and degradation
TRINITY_DN27604_c0_g1	nnu:104593048	48.1	2.4e-56	-	cytochrome P450 71A1	K07409	cytochrome P450, family 1, subfamily A, polypeptide 2	EC:1.14.14.1	nnu00591	Linoleic acid metabolism	Metabolism	Lipid metabolism
TRINITY_DN27604_c0_g1	nnu:104593048	48.1	2.4e-56	-	cytochrome P450 71A1	K07409	cytochrome P450, family 1, subfamily A, polypeptide 2	EC:1.14.14.1	nnu00380	Tryptophan metabolism	Metabolism	Amino acid metabolism
TRINITY_DN27604_c0_g1	nnu:104593048	48.1	2.4e-56	-	cytochrome P450 71A1	K07409	cytochrome P450, family 1, subfamily A, polypeptide 2	EC:1.14.14.1	nnu00232	Caffeine metabolism	Metabolism	Biosynthesis of other secondary metabolites
TRINITY_DN27604_c0_g2	crb:CARUB_v10019287mg	62.5	1.4e-14	-	hypothetical protein	K00517	-	-	crb00903	Limonene and pinene degradation	Metabolism	Metabolism of terpenoids and polyketides
TRINITY_DN27604_c0_g2	crb:CARUB_v10019287mg	62.5	1.4e-14	-	hypothetical protein	K00517	-	-	crb00945	Stilbenoid, diarylheptanoid and gingerol biosynthesis	Metabolism	Biosynthesis of other secondary metabolites
TRINITY_DN27605_c1_g3	ath:AT1G80660	24.5	1.3e-34	HA9	H(+)-ATPase 9	K01535	H+-transporting ATPase	EC:3.6.3.6	ath00190	Oxidative phosphorylation	Metabolism	Energy metabolism
TRINITY_DN27605_c1_g4	ppp:PHYPADRAFT_61331	59.4	1.4e-18	-	hypothetical protein	K01099	phosphatidylinositol-bisphosphatase	EC:3.1.3.36	ppp00562	Inositol phosphate metabolism	Metabolism	Carbohydrate metabolism
TRINITY_DN27605_c1_g4	ppp:PHYPADRAFT_61331	59.4	1.4e-18	-	hypothetical protein	K01099	phosphatidylinositol-bisphosphatase	EC:3.1.3.36	ppp04070	Phosphatidylinositol signaling system	Environmental Information Processing	Signal transduction
TRINITY_DN27605_c1_g6	fve:101308891	62.2	7.6e-23	-	cyclin-D3-1	K14505	cyclin D3, plant	-	fve04075	Plant hormone signal transduction	Environmental Information Processing	Signal transduction
TRINITY_DN27606_c0_g1	cic:CICLE_v10024228mg	68.5	2e-174	-	hypothetical protein	K13412	calcium-dependent protein kinase	EC:2.7.11.1	cic04626	Plant-pathogen interaction	Organismal Systems	Environmental adaptation
TRINITY_DN27610_c0_g1	fve:101292602	96	0	-	diacylglycerol kinase 1	K00901	diacylglycerol kinase (ATP)	EC:2.7.1.107	fve00561	Glycerolipid metabolism	Metabolism	Lipid metabolism
TRINITY_DN27610_c0_g1	fve:101292602	96	0	-	diacylglycerol kinase 1	K00901	diacylglycerol kinase (ATP)	EC:2.7.1.107	fve00564	Glycerophospholipid metabolism	Metabolism	Lipid metabolism
TRINITY_DN27610_c0_g1	fve:101292602	96	0	-	diacylglycerol kinase 1	K00901	diacylglycerol kinase (ATP)	EC:2.7.1.107	fve04070	Phosphatidylinositol signaling system	Environmental Information Processing	Signal transduction
TRINITY_DN27610_c0_g2	eus:EUTSA_v10027481mg	36.4	4.5e-19	-	hypothetical protein	K09518	DnaJ homolog subfamily B member 12	-	eus04141	Protein processing in endoplasmic reticulum	Genetic Information Processing	Folding, sorting and degradation
TRINITY_DN27612_c1_g1	fve:101298602	61.7	1e-07	-	ubiquinone biosynthesis monooxygenase COQ6	K06126	ubiquinone biosynthesis monooxygenase Coq6	EC:1.14.13.-	fve00130	Ubiquinone and other terpenoid-quinone biosynthesis	Metabolism	Metabolism of cofactors and vitamins
TRINITY_DN27612_c2_g6	obr:102714965	40	4.7e-46	-	systemin receptor SR160-like	K13415	protein brassinosteroid insensitive 1	EC:2.7.10.1 2.7.11.1	obr04075	Plant hormone signal transduction	Environmental Information Processing	Signal transduction
TRINITY_DN27613_c1_g2	nnu:104588305	78.5	4.3e-26	-	B-cell receptor-associated protein 31-like	K14009	B-cell receptor-associated protein 31	-	nnu04141	Protein processing in endoplasmic reticulum	Genetic Information Processing	Folding, sorting and degradation
TRINITY_DN27613_c2_g1	vvi:100256951	63.6	1.8e-11	-	ribonucleoside-diphosphate reductase small chain A-like	K10808	ribonucleoside-diphosphate reductase subunit M2	EC:1.17.4.1	vvi00230	Purine metabolism	Metabolism	Nucleotide metabolism
TRINITY_DN27613_c2_g1	vvi:100256951	63.6	1.8e-11	-	ribonucleoside-diphosphate reductase small chain A-like	K10808	ribonucleoside-diphosphate reductase subunit M2	EC:1.17.4.1	vvi00240	Pyrimidine metabolism	Metabolism	Nucleotide metabolism
TRINITY_DN27613_c2_g1	vvi:100256951	63.6	1.8e-11	-	ribonucleoside-diphosphate reductase small chain A-like	K10808	ribonucleoside-diphosphate reductase subunit M2	EC:1.17.4.1	vvi00480	Glutathione metabolism	Metabolism	Metabolism of other amino acids
TRINITY_DN27613_c2_g3	ppp:PHYPADRAFT_187409	40.3	4.1e-36	-	hypothetical protein	K08332	vacuolar protein 8	-	ppp04140	Regulation of autophagy	Cellular Processes	Transport and catabolism
TRINITY_DN27614_c0_g1	smo:SELMODRAFT_270047	38.3	1.6e-45	GID1b-2	hypothetical protein	K14493	gibberellin receptor GID1	EC:3.-.-.-	smo04075	Plant hormone signal transduction	Environmental Information Processing	Signal transduction
TRINITY_DN27614_c0_g3	fve:101312551	93.3	1.8e-214	-	probable pectate lyase 4	K01728	pectate lyase	EC:4.2.2.2	fve00040	Pentose and glucuronate interconversions	Metabolism	Carbohydrate metabolism
TRINITY_DN27615_c0_g1	csl:COCSUDRAFT_47298	37.6	7e-51	-	hypothetical protein	K14552	NET1-associated nuclear protein 1 (U3 small nucleolar RNA-associated protein 17)	-	csl03008	Ribosome biogenesis in eukaryotes	Genetic Information Processing	Translation
TRINITY_DN27616_c0_g2	cam:101504750	32.2	7e-06	-	serine/threonine-protein kinase ULK3	K08269	serine/threonine-protein kinase ULK/ATG1	EC:2.7.11.1	cam04140	Regulation of autophagy	Cellular Processes	Transport and catabolism
TRINITY_DN27616_c1_g1	atr:18441414	30.6	4.4e-26	-	serine/threonine-protein kinase CTR1	K14510	serine/threonine-protein kinase CTR1	EC:2.7.11.1	atr04075	Plant hormone signal transduction	Environmental Information Processing	Signal transduction
TRINITY_DN27616_c1_g4	smo:SELMODRAFT_10499	50.6	3.2e-15	CTR1L1-1	hypothetical protein	K14510	serine/threonine-protein kinase CTR1	EC:2.7.11.1	smo04075	Plant hormone signal transduction	Environmental Information Processing	Signal transduction
TRINITY_DN27617_c1_g1	gsl:Gasu_60230	28.8	2.1e-53	-	5' nucleotidase family protein	K01081	5'-nucleotidase	EC:3.1.3.5	gsl00230	Purine metabolism	Metabolism	Nucleotide metabolism
TRINITY_DN27617_c1_g1	gsl:Gasu_60230	28.8	2.1e-53	-	5' nucleotidase family protein	K01081	5'-nucleotidase	EC:3.1.3.5	gsl00240	Pyrimidine metabolism	Metabolism	Nucleotide metabolism
TRINITY_DN27617_c1_g1	gsl:Gasu_60230	28.8	2.1e-53	-	5' nucleotidase family protein	K01081	5'-nucleotidase	EC:3.1.3.5	gsl00760	Nicotinate and nicotinamide metabolism	Metabolism	Metabolism of cofactors and vitamins
TRINITY_DN27618_c0_g1	vvi:104877814	56	1.6e-12	-	A/G-specific adenine DNA glycosylase-like	K03575	A/G-specific adenine glycosylase	EC:3.2.2.-	vvi03410	Base excision repair	Genetic Information Processing	Replication and repair
TRINITY_DN27619_c0_g3	nnu:104596714	33.3	4.6e-38	-	flavonol synthase/flavanone 3-hydroxylase-like	K05278	flavonol synthase	EC:1.14.11.23	nnu00941	Flavonoid biosynthesis	Metabolism	Biosynthesis of other secondary metabolites
TRINITY_DN27620_c0_g1	thj:104808371	48.6	1.4e-36	-	uncharacterized LOC104808371	K12447	UDP-sugar pyrophosphorylase	EC:2.7.7.64	thj00040	Pentose and glucuronate interconversions	Metabolism	Carbohydrate metabolism
TRINITY_DN27620_c0_g1	thj:104808371	48.6	1.4e-36	-	uncharacterized LOC104808371	K12447	UDP-sugar pyrophosphorylase	EC:2.7.7.64	thj00052	Galactose metabolism	Metabolism	Carbohydrate metabolism
TRINITY_DN27620_c0_g1	thj:104808371	48.6	1.4e-36	-	uncharacterized LOC104808371	K12447	UDP-sugar pyrophosphorylase	EC:2.7.7.64	thj00053	Ascorbate and aldarate metabolism	Metabolism	Carbohydrate metabolism
TRINITY_DN27620_c0_g1	thj:104808371	48.6	1.4e-36	-	uncharacterized LOC104808371	K12447	UDP-sugar pyrophosphorylase	EC:2.7.7.64	thj00520	Amino sugar and nucleotide sugar metabolism	Metabolism	Carbohydrate metabolism
TRINITY_DN27620_c0_g2	thj:104808371	50.7	9.7e-33	-	uncharacterized LOC104808371	K12447	UDP-sugar pyrophosphorylase	EC:2.7.7.64	thj00040	Pentose and glucuronate interconversions	Metabolism	Carbohydrate metabolism
TRINITY_DN27620_c0_g2	thj:104808371	50.7	9.7e-33	-	uncharacterized LOC104808371	K12447	UDP-sugar pyrophosphorylase	EC:2.7.7.64	thj00052	Galactose metabolism	Metabolism	Carbohydrate metabolism
TRINITY_DN27620_c0_g2	thj:104808371	50.7	9.7e-33	-	uncharacterized LOC104808371	K12447	UDP-sugar pyrophosphorylase	EC:2.7.7.64	thj00053	Ascorbate and aldarate metabolism	Metabolism	Carbohydrate metabolism
TRINITY_DN27620_c0_g2	thj:104808371	50.7	9.7e-33	-	uncharacterized LOC104808371	K12447	UDP-sugar pyrophosphorylase	EC:2.7.7.64	thj00520	Amino sugar and nucleotide sugar metabolism	Metabolism	Carbohydrate metabolism
TRINITY_DN27622_c0_g1	nnu:104587944	85.2	4.4e-43	-	V-type proton ATPase subunit G 1-like	K02152	V-type H+-transporting ATPase subunit G	-	nnu00190	Oxidative phosphorylation	Metabolism	Energy metabolism
TRINITY_DN27622_c0_g1	nnu:104587944	85.2	4.4e-43	-	V-type proton ATPase subunit G 1-like	K02152	V-type H+-transporting ATPase subunit G	-	nnu04145	Phagosome	Cellular Processes	Transport and catabolism
TRINITY_DN27623_c0_g2	fve:101304283	90.1	1.2e-131	-	radical S-adenosyl methionine domain-containing protein 1	K02495	oxygen-independent coproporphyrinogen III oxidase	EC:1.3.99.22	fve00860	Porphyrin and chlorophyll metabolism	Metabolism	Metabolism of cofactors and vitamins
TRINITY_DN27624_c1_g1	pmum:103320333	44.6	1.4e-39	-	pentatricopeptide repeat-containing protein At2g04860	K01176	alpha-amylase	EC:3.2.1.1	pmum00500	Starch and sucrose metabolism	Metabolism	Carbohydrate metabolism
TRINITY_DN27624_c1_g2	fve:101291060	61.9	2.8e-14	-	nuclear pore complex protein NUP96	K14297	nuclear pore complex protein Nup98-Nup96	-	fve03013	RNA transport	Genetic Information Processing	Translation
TRINITY_DN27624_c1_g9	tcc:TCM_005697	35.5	1.3e-06	-	Pentatricopeptide repeat superfamily protein isoform 1	K01074	palmitoyl-protein thioesterase	EC:3.1.2.22	tcc01212	Fatty acid metabolism	Metabolism	Overview
TRINITY_DN27624_c1_g9	tcc:TCM_005697	35.5	1.3e-06	-	Pentatricopeptide repeat superfamily protein isoform 1	K01074	palmitoyl-protein thioesterase	EC:3.1.2.22	tcc00062	Fatty acid elongation	Metabolism	Lipid metabolism
TRINITY_DN27625_c0_g1	tcc:TCM_015486	68.3	1.4e-16	-	NAD(P)-linked oxidoreductase superfamily protein	K05275	pyridoxine 4-dehydrogenase	EC:1.1.1.65	tcc00750	Vitamin B6 metabolism	Metabolism	Metabolism of cofactors and vitamins
TRINITY_DN27625_c0_g2	fve:101313018	97.3	7.3e-58	-	small nuclear ribonucleoprotein-associated protein B'	K11086	small nuclear ribonucleoprotein B and B'	-	fve03040	Spliceosome	Genetic Information Processing	Transcription
TRINITY_DN27625_c0_g4	tcc:TCM_015486	35.4	2.4e-15	-	NAD(P)-linked oxidoreductase superfamily protein	K05275	pyridoxine 4-dehydrogenase	EC:1.1.1.65	tcc00750	Vitamin B6 metabolism	Metabolism	Metabolism of cofactors and vitamins
TRINITY_DN27625_c0_g5	cit:102630807	84.6	5.6e-56	-	small nuclear ribonucleoprotein-associated protein B'-like	K11086	small nuclear ribonucleoprotein B and B'	-	cit03040	Spliceosome	Genetic Information Processing	Transcription
TRINITY_DN27625_c0_g6	tcc:TCM_015486	68.3	4e-16	-	NAD(P)-linked oxidoreductase superfamily protein	K05275	pyridoxine 4-dehydrogenase	EC:1.1.1.65	tcc00750	Vitamin B6 metabolism	Metabolism	Metabolism of cofactors and vitamins
TRINITY_DN27626_c0_g4	mus:103981499	25.8	2.6e-19	-	shaggy-related protein kinase eta-like	K14502	protein brassinosteroid insensitive 2	EC:2.7.11.1	mus04075	Plant hormone signal transduction	Environmental Information Processing	Signal transduction
TRINITY_DN27627_c0_g1	pop:POPTR_0005s02690g	32.6	3.9e-25	-	PWWP domain-containing family protein	K17398	DNA (cytosine-5)-methyltransferase 3A	EC:2.1.1.37	pop00270	Cysteine and methionine metabolism	Metabolism	Amino acid metabolism
TRINITY_DN27628_c0_g1	osa:4334472	69.4	1.7e-32	-	Os03g0803000	K08515	vesicle-associated membrane protein 7	-	osa04130	SNARE interactions in vesicular transport	Genetic Information Processing	Folding, sorting and degradation
TRINITY_DN27628_c0_g2	osa:4334472	54.7	2.8e-09	-	Os03g0803000	K08515	vesicle-associated membrane protein 7	-	osa04130	SNARE interactions in vesicular transport	Genetic Information Processing	Folding, sorting and degradation
TRINITY_DN27628_c1_g2	fve:101310702	82	4.5e-50	-	DEAD-box ATP-dependent RNA helicase 20	K12823	ATP-dependent RNA helicase DDX5/DBP2	EC:3.6.4.13	fve03040	Spliceosome	Genetic Information Processing	Transcription
TRINITY_DN27628_c1_g3	fve:101297138	97.8	2.3e-229	-	DEAD-box ATP-dependent RNA helicase 20	K12823	ATP-dependent RNA helicase DDX5/DBP2	EC:3.6.4.13	fve03040	Spliceosome	Genetic Information Processing	Transcription
TRINITY_DN27628_c1_g5	fve:101310702	95.2	2.8e-135	-	DEAD-box ATP-dependent RNA helicase 20	K12823	ATP-dependent RNA helicase DDX5/DBP2	EC:3.6.4.13	fve03040	Spliceosome	Genetic Information Processing	Transcription
TRINITY_DN27628_c1_g6	smo:SELMODRAFT_430375	89.5	2.3e-22	-	hypothetical protein	K03021	DNA-directed RNA polymerase III subunit RPC2	EC:2.7.7.6	smo00230	Purine metabolism	Metabolism	Nucleotide metabolism
TRINITY_DN27628_c1_g6	smo:SELMODRAFT_430375	89.5	2.3e-22	-	hypothetical protein	K03021	DNA-directed RNA polymerase III subunit RPC2	EC:2.7.7.6	smo00240	Pyrimidine metabolism	Metabolism	Nucleotide metabolism
TRINITY_DN27628_c1_g6	smo:SELMODRAFT_430375	89.5	2.3e-22	-	hypothetical protein	K03021	DNA-directed RNA polymerase III subunit RPC2	EC:2.7.7.6	smo03020	RNA polymerase	Genetic Information Processing	Transcription
TRINITY_DN27633_c0_g3	mdm:103407923	78.4	9e-80	-	UTP--glucose-1-phosphate uridylyltransferase-like	K00963	UTP--glucose-1-phosphate uridylyltransferase	EC:2.7.7.9	mdm00040	Pentose and glucuronate interconversions	Metabolism	Carbohydrate metabolism
TRINITY_DN27633_c0_g3	mdm:103407923	78.4	9e-80	-	UTP--glucose-1-phosphate uridylyltransferase-like	K00963	UTP--glucose-1-phosphate uridylyltransferase	EC:2.7.7.9	mdm00052	Galactose metabolism	Metabolism	Carbohydrate metabolism
TRINITY_DN27633_c0_g3	mdm:103407923	78.4	9e-80	-	UTP--glucose-1-phosphate uridylyltransferase-like	K00963	UTP--glucose-1-phosphate uridylyltransferase	EC:2.7.7.9	mdm00500	Starch and sucrose metabolism	Metabolism	Carbohydrate metabolism
TRINITY_DN27633_c0_g3	mdm:103407923	78.4	9e-80	-	UTP--glucose-1-phosphate uridylyltransferase-like	K00963	UTP--glucose-1-phosphate uridylyltransferase	EC:2.7.7.9	mdm00520	Amino sugar and nucleotide sugar metabolism	Metabolism	Carbohydrate metabolism
TRINITY_DN27633_c0_g4	fve:101292634	90.7	4.7e-228	-	UTP--glucose-1-phosphate uridylyltransferase	K00963	UTP--glucose-1-phosphate uridylyltransferase	EC:2.7.7.9	fve00040	Pentose and glucuronate interconversions	Metabolism	Carbohydrate metabolism
TRINITY_DN27633_c0_g4	fve:101292634	90.7	4.7e-228	-	UTP--glucose-1-phosphate uridylyltransferase	K00963	UTP--glucose-1-phosphate uridylyltransferase	EC:2.7.7.9	fve00052	Galactose metabolism	Metabolism	Carbohydrate metabolism
TRINITY_DN27633_c0_g4	fve:101292634	90.7	4.7e-228	-	UTP--glucose-1-phosphate uridylyltransferase	K00963	UTP--glucose-1-phosphate uridylyltransferase	EC:2.7.7.9	fve00500	Starch and sucrose metabolism	Metabolism	Carbohydrate metabolism
TRINITY_DN27633_c0_g4	fve:101292634	90.7	4.7e-228	-	UTP--glucose-1-phosphate uridylyltransferase	K00963	UTP--glucose-1-phosphate uridylyltransferase	EC:2.7.7.9	fve00520	Amino sugar and nucleotide sugar metabolism	Metabolism	Carbohydrate metabolism
TRINITY_DN27635_c0_g1	fve:101297413	99.2	2e-150	-	60S ribosomal protein L8-3	K02938	large subunit ribosomal protein L8e	-	fve03010	Ribosome	Genetic Information Processing	Translation
TRINITY_DN27635_c0_g2	pvu:PHAVU_002G109700g	100	7.1e-42	-	hypothetical protein	K02938	large subunit ribosomal protein L8e	-	pvu03010	Ribosome	Genetic Information Processing	Translation
TRINITY_DN27639_c0_g2	fve:101298098	94.4	2e-222	-	uroporphyrinogen decarboxylase 1	K01599	uroporphyrinogen decarboxylase	EC:4.1.1.37	fve00860	Porphyrin and chlorophyll metabolism	Metabolism	Metabolism of cofactors and vitamins
TRINITY_DN27639_c0_g4	pda:103718538	72.9	8e-11	-	uroporphyrinogen decarboxylase 1	K01599	uroporphyrinogen decarboxylase	EC:4.1.1.37	pda00860	Porphyrin and chlorophyll metabolism	Metabolism	Metabolism of cofactors and vitamins
TRINITY_DN27640_c0_g2	pop:POPTR_0002s19540g	42.4	1.5e-39	POPTRDRAFT_552542	DEAD/DEAH box helicase family protein	K12835	ATP-dependent RNA helicase DDX42	EC:3.6.4.13	pop03040	Spliceosome	Genetic Information Processing	Transcription
TRINITY_DN27640_c0_g3	mtr:MTR_4g134170	35.9	6.7e-20	-	DEAD-box ATP-dependent RNA helicase	K12858	ATP-dependent RNA helicase DDX23/PRP28	EC:3.6.4.13	mtr03040	Spliceosome	Genetic Information Processing	Transcription
TRINITY_DN27640_c0_g4	ota:Ot09g00780	40	7.4e-10	-	DEAD-box protein abstrakt (ISS)	K12811	ATP-dependent RNA helicase DDX46/PRP5	EC:3.6.4.13	ota03040	Spliceosome	Genetic Information Processing	Transcription
TRINITY_DN27642_c0_g11	cam:101497514	53.5	4.2e-22	-	aldehyde dehydrogenase family 3 member H1-like	K00128	aldehyde dehydrogenase (NAD+)	EC:1.2.1.3	cam00010	Glycolysis / Gluconeogenesis	Metabolism	Carbohydrate metabolism
TRINITY_DN27642_c0_g11	cam:101497514	53.5	4.2e-22	-	aldehyde dehydrogenase family 3 member H1-like	K00128	aldehyde dehydrogenase (NAD+)	EC:1.2.1.3	cam00040	Pentose and glucuronate interconversions	Metabolism	Carbohydrate metabolism
TRINITY_DN27642_c0_g11	cam:101497514	53.5	4.2e-22	-	aldehyde dehydrogenase family 3 member H1-like	K00128	aldehyde dehydrogenase (NAD+)	EC:1.2.1.3	cam00053	Ascorbate and aldarate metabolism	Metabolism	Carbohydrate metabolism
TRINITY_DN27642_c0_g11	cam:101497514	53.5	4.2e-22	-	aldehyde dehydrogenase family 3 member H1-like	K00128	aldehyde dehydrogenase (NAD+)	EC:1.2.1.3	cam00620	Pyruvate metabolism	Metabolism	Carbohydrate metabolism
TRINITY_DN27642_c0_g11	cam:101497514	53.5	4.2e-22	-	aldehyde dehydrogenase family 3 member H1-like	K00128	aldehyde dehydrogenase (NAD+)	EC:1.2.1.3	cam00071	Fatty acid degradation	Metabolism	Lipid metabolism
TRINITY_DN27642_c0_g11	cam:101497514	53.5	4.2e-22	-	aldehyde dehydrogenase family 3 member H1-like	K00128	aldehyde dehydrogenase (NAD+)	EC:1.2.1.3	cam00561	Glycerolipid metabolism	Metabolism	Lipid metabolism
TRINITY_DN27642_c0_g11	cam:101497514	53.5	4.2e-22	-	aldehyde dehydrogenase family 3 member H1-like	K00128	aldehyde dehydrogenase (NAD+)	EC:1.2.1.3	cam00280	Valine, leucine and isoleucine degradation	Metabolism	Amino acid metabolism
TRINITY_DN27642_c0_g11	cam:101497514	53.5	4.2e-22	-	aldehyde dehydrogenase family 3 member H1-like	K00128	aldehyde dehydrogenase (NAD+)	EC:1.2.1.3	cam00310	Lysine degradation	Metabolism	Amino acid metabolism
TRINITY_DN27642_c0_g11	cam:101497514	53.5	4.2e-22	-	aldehyde dehydrogenase family 3 member H1-like	K00128	aldehyde dehydrogenase (NAD+)	EC:1.2.1.3	cam00330	Arginine and proline metabolism	Metabolism	Amino acid metabolism
TRINITY_DN27642_c0_g11	cam:101497514	53.5	4.2e-22	-	aldehyde dehydrogenase family 3 member H1-like	K00128	aldehyde dehydrogenase (NAD+)	EC:1.2.1.3	cam00340	Histidine metabolism	Metabolism	Amino acid metabolism
TRINITY_DN27642_c0_g11	cam:101497514	53.5	4.2e-22	-	aldehyde dehydrogenase family 3 member H1-like	K00128	aldehyde dehydrogenase (NAD+)	EC:1.2.1.3	cam00380	Tryptophan metabolism	Metabolism	Amino acid metabolism
TRINITY_DN27642_c0_g11	cam:101497514	53.5	4.2e-22	-	aldehyde dehydrogenase family 3 member H1-like	K00128	aldehyde dehydrogenase (NAD+)	EC:1.2.1.3	cam00410	beta-Alanine metabolism	Metabolism	Metabolism of other amino acids
TRINITY_DN27642_c0_g11	cam:101497514	53.5	4.2e-22	-	aldehyde dehydrogenase family 3 member H1-like	K00128	aldehyde dehydrogenase (NAD+)	EC:1.2.1.3	cam00903	Limonene and pinene degradation	Metabolism	Metabolism of terpenoids and polyketides
TRINITY_DN27642_c0_g4	fve:101300848	87.1	5.1e-45	-	auxin-induced protein X15-like	K14488	SAUR family protein	-	fve04075	Plant hormone signal transduction	Environmental Information Processing	Signal transduction
TRINITY_DN27642_c0_g5	fve:101294114	84.7	1.2e-34	-	auxin-induced protein 10A5-like	K14488	SAUR family protein	-	fve04075	Plant hormone signal transduction	Environmental Information Processing	Signal transduction
TRINITY_DN27642_c0_g8	tcc:TCM_015486	51.7	4.2e-08	-	NAD(P)-linked oxidoreductase superfamily protein	K05275	pyridoxine 4-dehydrogenase	EC:1.1.1.65	tcc00750	Vitamin B6 metabolism	Metabolism	Metabolism of cofactors and vitamins
TRINITY_DN27643_c3_g2	pmum:103336235	36.5	1.1e-18	-	histone-lysine N-methyltransferase ASHH1	K11423	histone-lysine N-methyltransferase SETD2	EC:2.1.1.43	pmum00310	Lysine degradation	Metabolism	Amino acid metabolism
TRINITY_DN27644_c0_g1	obr:102715770	43.1	2e-91	-	116 kDa U5 small nuclear ribonucleoprotein component-like	K12852	116 kDa U5 small nuclear ribonucleoprotein component	-	obr03040	Spliceosome	Genetic Information Processing	Transcription
TRINITY_DN27646_c0_g2	brp:103868062	32.4	1.9e-50	-	O-acyltransferase WSD1	K15406	wax-ester synthase / diacylglycerol O-acyltransferase	EC:2.3.1.75 2.3.1.20	brp00073	Cutin, suberine and wax biosynthesis	Metabolism	Lipid metabolism
TRINITY_DN27647_c0_g1	nnu:104609601	37.3	2.9e-67	-	pentatricopeptide repeat-containing protein At2g04860	K01176	alpha-amylase	EC:3.2.1.1	nnu00500	Starch and sucrose metabolism	Metabolism	Carbohydrate metabolism
TRINITY_DN27648_c1_g3	fve:101314636	95.8	0	-	pyruvate decarboxylase 1	K01568	pyruvate decarboxylase	EC:4.1.1.1	fve00010	Glycolysis / Gluconeogenesis	Metabolism	Carbohydrate metabolism
TRINITY_DN27650_c1_g1	fve:101298350	96	3.2e-52	-	phosphatidylinositol N-acetylglucosaminyltransferase gpi3 subunit-like	K03857	phosphatidylinositol glycan, class A	EC:2.4.1.198	fve00563	Glycosylphosphatidylinositol(GPI)-anchor biosynthesis	Metabolism	Glycan biosynthesis and metabolism
TRINITY_DN27650_c2_g1	fve:101308555	98.4	2.7e-205	-	phosphatidylinositol N-acetylglucosaminyltransferase gpi3 subunit-like	K03857	phosphatidylinositol glycan, class A	EC:2.4.1.198	fve00563	Glycosylphosphatidylinositol(GPI)-anchor biosynthesis	Metabolism	Glycan biosynthesis and metabolism
TRINITY_DN27651_c2_g13	cit:102624793	41	4.4e-35	-	topless-related protein 4-like	K14558	periodic tryptophan protein 2	-	cit03008	Ribosome biogenesis in eukaryotes	Genetic Information Processing	Translation
TRINITY_DN27651_c2_g3	gmx:100792815	74.7	1.6e-34	-	uncharacterized LOC100792815	K03868	RING-box protein 1	-	gmx04141	Protein processing in endoplasmic reticulum	Genetic Information Processing	Folding, sorting and degradation
TRINITY_DN27651_c2_g3	gmx:100792815	74.7	1.6e-34	-	uncharacterized LOC100792815	K03868	RING-box protein 1	-	gmx04120	Ubiquitin mediated proteolysis	Genetic Information Processing	Folding, sorting and degradation
TRINITY_DN27651_c2_g3	gmx:100792815	74.7	1.6e-34	-	uncharacterized LOC100792815	K03868	RING-box protein 1	-	gmx03420	Nucleotide excision repair	Genetic Information Processing	Replication and repair
TRINITY_DN27651_c2_g8	atr:18447024	47.5	6.9e-77	-	cinnamoyl-CoA reductase 1	K09753	cinnamoyl-CoA reductase	EC:1.2.1.44	atr00940	Phenylpropanoid biosynthesis	Metabolism	Biosynthesis of other secondary metabolites
TRINITY_DN27652_c0_g2	mtr:MTR_1g025060	80	1.1e-15	-	uridine 5-monophosphate synthase-like protein	K13421	uridine monophosphate synthetase	EC:2.4.2.10 4.1.1.23	mtr00240	Pyrimidine metabolism	Metabolism	Nucleotide metabolism
TRINITY_DN27652_c0_g3	fve:101310257	96.9	1.8e-232	-	uridine 5'-monophosphate synthase	K13421	uridine monophosphate synthetase	EC:2.4.2.10 4.1.1.23	fve00240	Pyrimidine metabolism	Metabolism	Nucleotide metabolism
TRINITY_DN27652_c0_g4	fve:101310257	66.7	1.3e-38	-	uridine 5'-monophosphate synthase	K13421	uridine monophosphate synthetase	EC:2.4.2.10 4.1.1.23	fve00240	Pyrimidine metabolism	Metabolism	Nucleotide metabolism
TRINITY_DN27653_c0_g1	mtr:MTR_0267s0070	42.1	5.5e-25	-	NB-ARC domain disease resistance protein	K12818	ATP-dependent RNA helicase DHX8/PRP22	EC:3.6.4.13	mtr03040	Spliceosome	Genetic Information Processing	Transcription
TRINITY_DN27653_c0_g2	sbi:SORBI_05g002510	38.6	1e-08	SORBIDRAFT_05g002510	hypothetical protein	K13457	disease resistance protein RPM1	-	sbi04626	Plant-pathogen interaction	Organismal Systems	Environmental adaptation
TRINITY_DN27654_c0_g10	fve:101293144	80.9	4.5e-24	-	elongation factor Tu GTP-binding domain-containing protein 1	K14536	ribosome assembly protein 1	EC:3.6.5.-	fve03008	Ribosome biogenesis in eukaryotes	Genetic Information Processing	Translation
TRINITY_DN27654_c0_g11	gmx:100777369	33	1.6e-07	-	pentatricopeptide repeat-containing protein At4g25270	K13800	UMP-CMP kinase	EC:2.7.4.- 2.7.4.14	gmx00240	Pyrimidine metabolism	Metabolism	Nucleotide metabolism
TRINITY_DN27654_c0_g3	nnu:104609601	41.4	6.5e-10	-	pentatricopeptide repeat-containing protein At2g04860	K01176	alpha-amylase	EC:3.2.1.1	nnu00500	Starch and sucrose metabolism	Metabolism	Carbohydrate metabolism
TRINITY_DN27654_c0_g5	mdm:103440925	33.5	6.2e-20	-	pentatricopeptide repeat-containing protein At4g25270	K13800	UMP-CMP kinase	EC:2.7.4.- 2.7.4.14	mdm00240	Pyrimidine metabolism	Metabolism	Nucleotide metabolism
TRINITY_DN27654_c0_g7	cit:102622554	31.7	8.4e-27	-	pentatricopeptide repeat-containing protein At4g16470-like	K00857	thymidine kinase	EC:2.7.1.21	cit00240	Pyrimidine metabolism	Metabolism	Nucleotide metabolism
TRINITY_DN27656_c0_g1	nnu:104609601	32.3	2e-58	-	pentatricopeptide repeat-containing protein At2g04860	K01176	alpha-amylase	EC:3.2.1.1	nnu00500	Starch and sucrose metabolism	Metabolism	Carbohydrate metabolism
TRINITY_DN27656_c0_g3	jcu:105633892	33.1	2.2e-19	-	pentatricopeptide repeat-containing protein At2g04860	K01176	alpha-amylase	EC:3.2.1.1	jcu00500	Starch and sucrose metabolism	Metabolism	Carbohydrate metabolism
TRINITY_DN27656_c0_g4	rcu:RCOM_1590660	34.1	2.5e-61	-	pentatricopeptide repeat-containing protein	K01176	alpha-amylase	EC:3.2.1.1	rcu00500	Starch and sucrose metabolism	Metabolism	Carbohydrate metabolism
TRINITY_DN27658_c0_g1	mus:103969281	60.4	3.2e-112	-	lipid phosphate phosphatase 2-like	K18693	diacylglycerol diphosphate phosphatase / phosphatidate phosphatase	EC:3.1.3.81 3.1.3.4	mus00561	Glycerolipid metabolism	Metabolism	Lipid metabolism
TRINITY_DN27658_c0_g1	mus:103969281	60.4	3.2e-112	-	lipid phosphate phosphatase 2-like	K18693	diacylglycerol diphosphate phosphatase / phosphatidate phosphatase	EC:3.1.3.81 3.1.3.4	mus00564	Glycerophospholipid metabolism	Metabolism	Lipid metabolism
TRINITY_DN27660_c0_g1	csv:101208440	86	9.3e-26	-	vacuolar protein sorting-associated protein 2 homolog 2	K12191	charged multivesicular body protein 2A	-	csv04144	Endocytosis	Cellular Processes	Transport and catabolism
TRINITY_DN27662_c0_g1	jcu:105650214	51.1	1.1e-30	-	uncharacterized LOC105650214	K13407	fatty acid omega-hydroxylase	EC:1.14.-.-	jcu00073	Cutin, suberine and wax biosynthesis	Metabolism	Lipid metabolism
TRINITY_DN27662_c0_g3	jcu:105650214	50.4	6.1e-23	-	uncharacterized LOC105650214	K13407	fatty acid omega-hydroxylase	EC:1.14.-.-	jcu00073	Cutin, suberine and wax biosynthesis	Metabolism	Lipid metabolism
TRINITY_DN27663_c0_g4	fve:101295370	81.3	1.1e-226	-	acetolactate synthase small subunit 2	K01653	acetolactate synthase I/III small subunit	EC:2.2.1.6	fve01210	2-Oxocarboxylic acid metabolism	Metabolism	Overview
TRINITY_DN27663_c0_g4	fve:101295370	81.3	1.1e-226	-	acetolactate synthase small subunit 2	K01653	acetolactate synthase I/III small subunit	EC:2.2.1.6	fve01230	Biosynthesis of amino acids	Metabolism	Overview
TRINITY_DN27663_c0_g4	fve:101295370	81.3	1.1e-226	-	acetolactate synthase small subunit 2	K01653	acetolactate synthase I/III small subunit	EC:2.2.1.6	fve00650	Butanoate metabolism	Metabolism	Carbohydrate metabolism
TRINITY_DN27663_c0_g4	fve:101295370	81.3	1.1e-226	-	acetolactate synthase small subunit 2	K01653	acetolactate synthase I/III small subunit	EC:2.2.1.6	fve00660	C5-Branched dibasic acid metabolism	Metabolism	Carbohydrate metabolism
TRINITY_DN27663_c0_g4	fve:101295370	81.3	1.1e-226	-	acetolactate synthase small subunit 2	K01653	acetolactate synthase I/III small subunit	EC:2.2.1.6	fve00290	Valine, leucine and isoleucine biosynthesis	Metabolism	Amino acid metabolism
TRINITY_DN27663_c0_g4	fve:101295370	81.3	1.1e-226	-	acetolactate synthase small subunit 2	K01653	acetolactate synthase I/III small subunit	EC:2.2.1.6	fve00770	Pantothenate and CoA biosynthesis	Metabolism	Metabolism of cofactors and vitamins
TRINITY_DN27664_c0_g1	vvi:100233127	60.7	3.2e-159	TIR1	protein TRANSPORT INHIBITOR RESPONSE 1	K14485	transport inhibitor response 1	-	vvi04075	Plant hormone signal transduction	Environmental Information Processing	Signal transduction
TRINITY_DN27664_c0_g12	pvu:PHAVU_001G202600g	92.3	3.2e-06	-	hypothetical protein	K14485	transport inhibitor response 1	-	pvu04075	Plant hormone signal transduction	Environmental Information Processing	Signal transduction
TRINITY_DN27664_c0_g13	egr:104426725	64.4	7.9e-160	-	protein TRANSPORT INHIBITOR RESPONSE 1	K14485	transport inhibitor response 1	-	egr04075	Plant hormone signal transduction	Environmental Information Processing	Signal transduction
TRINITY_DN27664_c0_g2	nnu:104588936	71.2	1.9e-58	-	protein TRANSPORT INHIBITOR RESPONSE 1-like	K14485	transport inhibitor response 1	-	nnu04075	Plant hormone signal transduction	Environmental Information Processing	Signal transduction
TRINITY_DN27664_c0_g3	sind:105163185	78.9	2.5e-28	-	protein TRANSPORT INHIBITOR RESPONSE 1-like	K14485	transport inhibitor response 1	-	sind04075	Plant hormone signal transduction	Environmental Information Processing	Signal transduction
TRINITY_DN27664_c0_g5	sind:105165245	84.1	8e-137	-	protein TRANSPORT INHIBITOR RESPONSE 1-like	K14485	transport inhibitor response 1	-	sind04075	Plant hormone signal transduction	Environmental Information Processing	Signal transduction
TRINITY_DN27664_c0_g6	nnu:104588936	81.7	1.8e-54	-	protein TRANSPORT INHIBITOR RESPONSE 1-like	K14485	transport inhibitor response 1	-	nnu04075	Plant hormone signal transduction	Environmental Information Processing	Signal transduction
TRINITY_DN27665_c0_g1	mtr:MTR_0267s0070	33.5	1.4e-62	-	NB-ARC domain disease resistance protein	K12818	ATP-dependent RNA helicase DHX8/PRP22	EC:3.6.4.13	mtr03040	Spliceosome	Genetic Information Processing	Transcription
TRINITY_DN27666_c0_g1	fve:101305768	97.1	3.6e-116	-	ferrochelatase-2	K01772	ferrochelatase	EC:4.99.1.1	fve00860	Porphyrin and chlorophyll metabolism	Metabolism	Metabolism of cofactors and vitamins
TRINITY_DN27666_c0_g3	pvu:PHAVU_002G278100g	100	4.7e-34	-	hypothetical protein	K01772	ferrochelatase	EC:4.99.1.1	pvu00860	Porphyrin and chlorophyll metabolism	Metabolism	Metabolism of cofactors and vitamins
TRINITY_DN27666_c0_g8	fve:101301836	94.6	1.4e-142	-	sphinganine C(4)-monooxygenase 1-like	K04713	sphinganine C4-monooxygenase	EC:1.14.18.5	fve00600	Sphingolipid metabolism	Metabolism	Lipid metabolism
TRINITY_DN27667_c0_g1	fve:101298651	94.1	5.2e-225	-	DNA repair protein recA homolog 1	K03553	recombination protein RecA	-	fve03440	Homologous recombination	Genetic Information Processing	Replication and repair
TRINITY_DN27668_c0_g2	thj:104824416	84.4	4.4e-08	-	uncharacterized LOC104824416	K14404	cleavage and polyadenylation specificity factor subunit 4	-	thj03015	mRNA surveillance pathway	Genetic Information Processing	Translation
TRINITY_DN27668_c0_g3	thj:104824416	84.4	2.7e-09	-	uncharacterized LOC104824416	K14404	cleavage and polyadenylation specificity factor subunit 4	-	thj03015	mRNA surveillance pathway	Genetic Information Processing	Translation
TRINITY_DN27670_c2_g1	fve:101297349	96.9	1.1e-48	-	putative 3	K00863	triose/dihydroxyacetone kinase / FAD-AMP lyase (cyclizing)	EC:2.7.1.28 2.7.1.29 4.6.1.15	fve01200	Carbon metabolism	Metabolism	Overview
TRINITY_DN27670_c2_g1	fve:101297349	96.9	1.1e-48	-	putative 3	K00863	triose/dihydroxyacetone kinase / FAD-AMP lyase (cyclizing)	EC:2.7.1.28 2.7.1.29 4.6.1.15	fve00051	Fructose and mannose metabolism	Metabolism	Carbohydrate metabolism
TRINITY_DN27670_c2_g1	fve:101297349	96.9	1.1e-48	-	putative 3	K00863	triose/dihydroxyacetone kinase / FAD-AMP lyase (cyclizing)	EC:2.7.1.28 2.7.1.29 4.6.1.15	fve00561	Glycerolipid metabolism	Metabolism	Lipid metabolism
TRINITY_DN27670_c2_g2	fve:101312822	89.6	8.4e-93	-	D-galacturonate reductase	K19642	D-galacturonate reductase	EC:1.1.1.365	fve00053	Ascorbate and aldarate metabolism	Metabolism	Carbohydrate metabolism
TRINITY_DN27670_c2_g3	nnu:104595939	70.5	1.1e-09	-	luminal-binding protein 8-like	K09490	heat shock 70kDa protein 5	-	nnu03060	Protein export	Genetic Information Processing	Folding, sorting and degradation
TRINITY_DN27670_c2_g3	nnu:104595939	70.5	1.1e-09	-	luminal-binding protein 8-like	K09490	heat shock 70kDa protein 5	-	nnu04141	Protein processing in endoplasmic reticulum	Genetic Information Processing	Folding, sorting and degradation
TRINITY_DN27670_c2_g7	fve:101312822	79	4.1e-136	-	D-galacturonate reductase	K19642	D-galacturonate reductase	EC:1.1.1.365	fve00053	Ascorbate and aldarate metabolism	Metabolism	Carbohydrate metabolism
TRINITY_DN27672_c0_g12	eus:EUTSA_v10027481mg	54.1	1.5e-11	-	hypothetical protein	K09518	DnaJ homolog subfamily B member 12	-	eus04141	Protein processing in endoplasmic reticulum	Genetic Information Processing	Folding, sorting and degradation
TRINITY_DN27673_c0_g1	aly:ARALYDRAFT_340891	79.3	2.8e-61	-	hypothetical protein	K00770	1,4-beta-D-xylan synthase	EC:2.4.2.24	aly00500	Starch and sucrose metabolism	Metabolism	Carbohydrate metabolism
TRINITY_DN27673_c0_g1	aly:ARALYDRAFT_340891	79.3	2.8e-61	-	hypothetical protein	K00770	1,4-beta-D-xylan synthase	EC:2.4.2.24	aly00520	Amino sugar and nucleotide sugar metabolism	Metabolism	Carbohydrate metabolism
TRINITY_DN27673_c0_g3	gra:105785273	77.5	9.5e-30	-	oxysterol-binding protein-related protein 3A-like	K04354	serine/threonine-protein phosphatase 2A regulatory subunit B	-	gra03015	mRNA surveillance pathway	Genetic Information Processing	Translation
TRINITY_DN27674_c0_g1	pxb:103956598	70.1	2.1e-150	-	disease resistance protein RPM1-like	K13457	disease resistance protein RPM1	-	pxb04626	Plant-pathogen interaction	Organismal Systems	Environmental adaptation
TRINITY_DN27675_c0_g1	fve:101305015	94.2	3.3e-201	-	sorbitol dehydrogenase	K00008	L-iditol 2-dehydrogenase	EC:1.1.1.14	fve00040	Pentose and glucuronate interconversions	Metabolism	Carbohydrate metabolism
TRINITY_DN27675_c0_g1	fve:101305015	94.2	3.3e-201	-	sorbitol dehydrogenase	K00008	L-iditol 2-dehydrogenase	EC:1.1.1.14	fve00051	Fructose and mannose metabolism	Metabolism	Carbohydrate metabolism
TRINITY_DN27675_c0_g2	pvu:PHAVU_004G122700g	100	2.4e-48	-	hypothetical protein	K00008	L-iditol 2-dehydrogenase	EC:1.1.1.14	pvu00040	Pentose and glucuronate interconversions	Metabolism	Carbohydrate metabolism
TRINITY_DN27675_c0_g2	pvu:PHAVU_004G122700g	100	2.4e-48	-	hypothetical protein	K00008	L-iditol 2-dehydrogenase	EC:1.1.1.14	pvu00051	Fructose and mannose metabolism	Metabolism	Carbohydrate metabolism
TRINITY_DN27677_c0_g1	fve:101313352	68.9	4e-66	-	putative ABC transporter C family member 15	K05665	ATP-binding cassette, subfamily C (CFTR/MRP), member 1	-	fve02010	ABC transporters	Environmental Information Processing	Membrane transport
TRINITY_DN27677_c0_g2	fve:101299745	81.7	2.3e-32	-	histone-lysine N-methyltransferase SUVR3-like	K11433	histone-lysine N-methyltransferase SETMAR	EC:2.1.1.43	fve00310	Lysine degradation	Metabolism	Amino acid metabolism
TRINITY_DN27677_c0_g3	fve:101295388	81.1	1.1e-160	-	histone-lysine N-methyltransferase SUVR3-like	K11433	histone-lysine N-methyltransferase SETMAR	EC:2.1.1.43	fve00310	Lysine degradation	Metabolism	Amino acid metabolism
TRINITY_DN27678_c1_g1	mdm:103449447	29.6	1.8e-41	-	uncharacterized LOC103449447	K14400	pre-mRNA cleavage complex 2 protein Pcf11	-	mdm03015	mRNA surveillance pathway	Genetic Information Processing	Translation
TRINITY_DN27678_c1_g2	fve:101297355	87.3	1.3e-169	-	uncharacterized LOC101297355	K03354	anaphase-promoting complex subunit 7	-	fve04120	Ubiquitin mediated proteolysis	Genetic Information Processing	Folding, sorting and degradation
TRINITY_DN27678_c1_g4	mdm:103449447	31.2	1.3e-40	-	uncharacterized LOC103449447	K14400	pre-mRNA cleavage complex 2 protein Pcf11	-	mdm03015	mRNA surveillance pathway	Genetic Information Processing	Translation
TRINITY_DN27678_c1_g6	mdm:103424335	47.4	2.3e-123	-	uncharacterized LOC103424335	K01623	fructose-bisphosphate aldolase, class I	EC:4.1.2.13	mdm01200	Carbon metabolism	Metabolism	Overview
TRINITY_DN27678_c1_g6	mdm:103424335	47.4	2.3e-123	-	uncharacterized LOC103424335	K01623	fructose-bisphosphate aldolase, class I	EC:4.1.2.13	mdm01230	Biosynthesis of amino acids	Metabolism	Overview
TRINITY_DN27678_c1_g6	mdm:103424335	47.4	2.3e-123	-	uncharacterized LOC103424335	K01623	fructose-bisphosphate aldolase, class I	EC:4.1.2.13	mdm00010	Glycolysis / Gluconeogenesis	Metabolism	Carbohydrate metabolism
TRINITY_DN27678_c1_g6	mdm:103424335	47.4	2.3e-123	-	uncharacterized LOC103424335	K01623	fructose-bisphosphate aldolase, class I	EC:4.1.2.13	mdm00030	Pentose phosphate pathway	Metabolism	Carbohydrate metabolism
TRINITY_DN27678_c1_g6	mdm:103424335	47.4	2.3e-123	-	uncharacterized LOC103424335	K01623	fructose-bisphosphate aldolase, class I	EC:4.1.2.13	mdm00051	Fructose and mannose metabolism	Metabolism	Carbohydrate metabolism
TRINITY_DN27678_c1_g6	mdm:103424335	47.4	2.3e-123	-	uncharacterized LOC103424335	K01623	fructose-bisphosphate aldolase, class I	EC:4.1.2.13	mdm00710	Carbon fixation in photosynthetic organisms	Metabolism	Energy metabolism
TRINITY_DN27678_c1_g8	mdm:103417009	32.9	1.8e-15	-	uncharacterized LOC103417009	K00654	serine palmitoyltransferase	EC:2.3.1.50	mdm00600	Sphingolipid metabolism	Metabolism	Lipid metabolism
TRINITY_DN27679_c0_g2	bna:106395436	43.3	3.8e-06	-	U-box domain-containing protein 2-like	K08332	vacuolar protein 8	-	bna04140	Regulation of autophagy	Cellular Processes	Transport and catabolism
TRINITY_DN27680_c0_g1	fve:101303100	95.8	6.2e-112	-	ras-related protein RABA1d	K07904	Ras-related protein Rab-11A	-	fve04144	Endocytosis	Cellular Processes	Transport and catabolism
TRINITY_DN27680_c0_g2	fve:101305035	97.7	5.4e-114	-	ras-related protein Rab11C	K07904	Ras-related protein Rab-11A	-	fve04144	Endocytosis	Cellular Processes	Transport and catabolism
TRINITY_DN27680_c0_g3	gmx:100527366	85.2	4.3e-17	-	uncharacterized LOC100527366	K07904	Ras-related protein Rab-11A	-	gmx04144	Endocytosis	Cellular Processes	Transport and catabolism
TRINITY_DN27680_c0_g7	pmum:103325089	99.5	1.5e-118	-	ras-related protein RABA1f	K07904	Ras-related protein Rab-11A	-	pmum04144	Endocytosis	Cellular Processes	Transport and catabolism
TRINITY_DN27680_c0_g8	mdm:103426352	93.4	2.3e-92	-	ras-related protein RABF1	K07889	Ras-related protein Rab-5C	-	mdm04144	Endocytosis	Cellular Processes	Transport and catabolism
TRINITY_DN27680_c0_g8	mdm:103426352	93.4	2.3e-92	-	ras-related protein RABF1	K07889	Ras-related protein Rab-5C	-	mdm04145	Phagosome	Cellular Processes	Transport and catabolism
TRINITY_DN27680_c0_g9	fve:101302335	99.5	1.8e-118	-	ras-related protein Rab11D	K07904	Ras-related protein Rab-11A	-	fve04144	Endocytosis	Cellular Processes	Transport and catabolism
TRINITY_DN27682_c0_g1	fve:101315259	96.6	0	-	phenylalanine ammonia-lyase 1	K10775	phenylalanine ammonia-lyase	EC:4.3.1.24	fve00360	Phenylalanine metabolism	Metabolism	Amino acid metabolism
TRINITY_DN27682_c0_g1	fve:101315259	96.6	0	-	phenylalanine ammonia-lyase 1	K10775	phenylalanine ammonia-lyase	EC:4.3.1.24	fve00940	Phenylpropanoid biosynthesis	Metabolism	Biosynthesis of other secondary metabolites
TRINITY_DN27682_c0_g2	fve:101297727	97.8	1.8e-204	-	calcium-dependent protein kinase 3	K13412	calcium-dependent protein kinase	EC:2.7.11.1	fve04626	Plant-pathogen interaction	Organismal Systems	Environmental adaptation
TRINITY_DN27682_c0_g6	pop:POPTR_0012s11900g	82.7	2.4e-61	-	hypothetical protein	K14508	regulatory protein NPR1	-	pop04075	Plant hormone signal transduction	Environmental Information Processing	Signal transduction
TRINITY_DN27682_c0_g7	nnu:104610927	89.2	1.3e-42	-	calcium-dependent protein kinase 2-like	K13412	calcium-dependent protein kinase	EC:2.7.11.1	nnu04626	Plant-pathogen interaction	Organismal Systems	Environmental adaptation
TRINITY_DN27683_c0_g1	fve:101297570	89.1	2.8e-243	-	uncharacterized LOC101297570	K09903	uridylate kinase	EC:2.7.4.22	fve00240	Pyrimidine metabolism	Metabolism	Nucleotide metabolism
TRINITY_DN27684_c0_g1	mdm:103441481	92.2	2.7e-109	-	vesicle-associated membrane protein 711	K08515	vesicle-associated membrane protein 7	-	mdm04130	SNARE interactions in vesicular transport	Genetic Information Processing	Folding, sorting and degradation
TRINITY_DN27685_c0_g1	mdm:103447654	52.9	1.1e-48	-	anthranilate synthase alpha subunit 1	K01657	anthranilate synthase component I	EC:4.1.3.27	mdm01230	Biosynthesis of amino acids	Metabolism	Overview
TRINITY_DN27685_c0_g1	mdm:103447654	52.9	1.1e-48	-	anthranilate synthase alpha subunit 1	K01657	anthranilate synthase component I	EC:4.1.3.27	mdm00400	Phenylalanine, tyrosine and tryptophan biosynthesis	Metabolism	Amino acid metabolism
TRINITY_DN27685_c0_g2	mdm:103447654	53.4	7.4e-49	-	anthranilate synthase alpha subunit 1	K01657	anthranilate synthase component I	EC:4.1.3.27	mdm01230	Biosynthesis of amino acids	Metabolism	Overview
TRINITY_DN27685_c0_g2	mdm:103447654	53.4	7.4e-49	-	anthranilate synthase alpha subunit 1	K01657	anthranilate synthase component I	EC:4.1.3.27	mdm00400	Phenylalanine, tyrosine and tryptophan biosynthesis	Metabolism	Amino acid metabolism
TRINITY_DN27685_c0_g3	mtr:MTR_2g040160	48.4	1.7e-09	-	animal HSPA9 nucleotide-binding domain protein	K03283	heat shock 70kDa protein 1/8	-	mtr03040	Spliceosome	Genetic Information Processing	Transcription
TRINITY_DN27685_c0_g3	mtr:MTR_2g040160	48.4	1.7e-09	-	animal HSPA9 nucleotide-binding domain protein	K03283	heat shock 70kDa protein 1/8	-	mtr04141	Protein processing in endoplasmic reticulum	Genetic Information Processing	Folding, sorting and degradation
TRINITY_DN27685_c0_g3	mtr:MTR_2g040160	48.4	1.7e-09	-	animal HSPA9 nucleotide-binding domain protein	K03283	heat shock 70kDa protein 1/8	-	mtr04144	Endocytosis	Cellular Processes	Transport and catabolism
TRINITY_DN27686_c0_g1	fve:101304824	94.2	9e-159	-	soluble inorganic pyrophosphatase 6	K01507	inorganic pyrophosphatase	EC:3.6.1.1	fve00190	Oxidative phosphorylation	Metabolism	Energy metabolism
TRINITY_DN27687_c0_g1	ath:AT3G13300	50.5	3e-43	VCS	mRNA decapping complex VCS	K12616	enhancer of mRNA-decapping protein 4	-	ath03018	RNA degradation	Genetic Information Processing	Folding, sorting and degradation
TRINITY_DN27688_c0_g1	fve:101309997	88.8	5.2e-229	-	heparan-alpha-glucosaminide N-acetyltransferase-like	K10532	heparan-alpha-glucosaminide N-acetyltransferase	EC:2.3.1.78	fve00531	Glycosaminoglycan degradation	Metabolism	Glycan biosynthesis and metabolism
TRINITY_DN27689_c0_g1	fve:101303857	68.4	6.1e-138	-	protein SGT1 homolog	K12795	suppressor of G2 allele of SKP1	-	fve04626	Plant-pathogen interaction	Organismal Systems	Environmental adaptation
TRINITY_DN27690_c0_g2	fve:101304470	95.1	0	-	long chain acyl-CoA synthetase 6	K01897	long-chain acyl-CoA synthetase	EC:6.2.1.3	fve01212	Fatty acid metabolism	Metabolism	Overview
TRINITY_DN27690_c0_g2	fve:101304470	95.1	0	-	long chain acyl-CoA synthetase 6	K01897	long-chain acyl-CoA synthetase	EC:6.2.1.3	fve00061	Fatty acid biosynthesis	Metabolism	Lipid metabolism
TRINITY_DN27690_c0_g2	fve:101304470	95.1	0	-	long chain acyl-CoA synthetase 6	K01897	long-chain acyl-CoA synthetase	EC:6.2.1.3	fve00071	Fatty acid degradation	Metabolism	Lipid metabolism
TRINITY_DN27690_c0_g2	fve:101304470	95.1	0	-	long chain acyl-CoA synthetase 6	K01897	long-chain acyl-CoA synthetase	EC:6.2.1.3	fve04146	Peroxisome	Cellular Processes	Transport and catabolism
TRINITY_DN27691_c2_g1	mdm:103431505	84.9	9e-57	-	dCTP pyrophosphatase 1-like	K16904	dCTP diphosphatase	EC:3.6.1.12	mdm00240	Pyrimidine metabolism	Metabolism	Nucleotide metabolism
TRINITY_DN27691_c2_g10	brp:103855006	75.5	3.5e-20	-	cyclic dof factor 1-like	K16222	Dof zinc finger protein DOF5.5	-	brp04712	Circadian rhythm - plant	Organismal Systems	Environmental adaptation
TRINITY_DN27691_c2_g2	fve:101305026	90.1	5.9e-125	-	methylmalonate-semialdehyde dehydrogenase [acylating]	K00140	malonate-semialdehyde dehydrogenase (acetylating) / methylmalonate-semialdehyde dehydrogenase	EC:1.2.1.18 1.2.1.27	fve01200	Carbon metabolism	Metabolism	Overview
TRINITY_DN27691_c2_g2	fve:101305026	90.1	5.9e-125	-	methylmalonate-semialdehyde dehydrogenase [acylating]	K00140	malonate-semialdehyde dehydrogenase (acetylating) / methylmalonate-semialdehyde dehydrogenase	EC:1.2.1.18 1.2.1.27	fve00640	Propanoate metabolism	Metabolism	Carbohydrate metabolism
TRINITY_DN27691_c2_g2	fve:101305026	90.1	5.9e-125	-	methylmalonate-semialdehyde dehydrogenase [acylating]	K00140	malonate-semialdehyde dehydrogenase (acetylating) / methylmalonate-semialdehyde dehydrogenase	EC:1.2.1.18 1.2.1.27	fve00562	Inositol phosphate metabolism	Metabolism	Carbohydrate metabolism
TRINITY_DN27691_c2_g2	fve:101305026	90.1	5.9e-125	-	methylmalonate-semialdehyde dehydrogenase [acylating]	K00140	malonate-semialdehyde dehydrogenase (acetylating) / methylmalonate-semialdehyde dehydrogenase	EC:1.2.1.18 1.2.1.27	fve00280	Valine, leucine and isoleucine degradation	Metabolism	Amino acid metabolism
TRINITY_DN27691_c2_g2	fve:101305026	90.1	5.9e-125	-	methylmalonate-semialdehyde dehydrogenase [acylating]	K00140	malonate-semialdehyde dehydrogenase (acetylating) / methylmalonate-semialdehyde dehydrogenase	EC:1.2.1.18 1.2.1.27	fve00410	beta-Alanine metabolism	Metabolism	Metabolism of other amino acids
TRINITY_DN27691_c2_g3	brp:103855006	74.1	1.3e-20	-	cyclic dof factor 1-like	K16222	Dof zinc finger protein DOF5.5	-	brp04712	Circadian rhythm - plant	Organismal Systems	Environmental adaptation
TRINITY_DN27691_c2_g5	brp:103855006	71.4	5e-14	-	cyclic dof factor 1-like	K16222	Dof zinc finger protein DOF5.5	-	brp04712	Circadian rhythm - plant	Organismal Systems	Environmental adaptation
TRINITY_DN27691_c2_g6	eus:EUTSA_v10004655mg	44.1	2.3e-19	-	hypothetical protein	K16222	Dof zinc finger protein DOF5.5	-	eus04712	Circadian rhythm - plant	Organismal Systems	Environmental adaptation
TRINITY_DN27691_c2_g9	brp:103855006	72.2	6.7e-20	-	cyclic dof factor 1-like	K16222	Dof zinc finger protein DOF5.5	-	brp04712	Circadian rhythm - plant	Organismal Systems	Environmental adaptation
TRINITY_DN27693_c0_g1	fve:101314008	90.9	0	-	anaphase-promoting complex subunit 5	K03352	anaphase-promoting complex subunit 5	-	fve04120	Ubiquitin mediated proteolysis	Genetic Information Processing	Folding, sorting and degradation
TRINITY_DN27695_c2_g1	obr:102715163	58.6	9e-42	-	protein BRASSINOSTEROID INSENSITIVE 1-like	K13415	protein brassinosteroid insensitive 1	EC:2.7.10.1 2.7.11.1	obr04075	Plant hormone signal transduction	Environmental Information Processing	Signal transduction
TRINITY_DN27695_c2_g2	obr:102715163	40.5	1.3e-14	-	protein BRASSINOSTEROID INSENSITIVE 1-like	K13415	protein brassinosteroid insensitive 1	EC:2.7.10.1 2.7.11.1	obr04075	Plant hormone signal transduction	Environmental Information Processing	Signal transduction
TRINITY_DN27695_c2_g3	obr:102715163	51.1	6e-52	-	protein BRASSINOSTEROID INSENSITIVE 1-like	K13415	protein brassinosteroid insensitive 1	EC:2.7.10.1 2.7.11.1	obr04075	Plant hormone signal transduction	Environmental Information Processing	Signal transduction
TRINITY_DN27695_c2_g4	obr:102715163	49.1	3.8e-39	-	protein BRASSINOSTEROID INSENSITIVE 1-like	K13415	protein brassinosteroid insensitive 1	EC:2.7.10.1 2.7.11.1	obr04075	Plant hormone signal transduction	Environmental Information Processing	Signal transduction
TRINITY_DN27697_c0_g1	pda:103711699	84.2	2.1e-145	-	S-formylglutathione hydrolase	K01070	S-formylglutathione hydrolase	EC:3.1.2.12	pda01200	Carbon metabolism	Metabolism	Overview
TRINITY_DN27697_c0_g2	bna:106405110	44.7	1.3e-64	-	cyclin-dependent kinase D-1-like	K02202	cyclin-dependent kinase 7	EC:2.7.11.22 2.7.11.23	bna03022	Basal transcription factors	Genetic Information Processing	Transcription
TRINITY_DN27697_c0_g2	bna:106405110	44.7	1.3e-64	-	cyclin-dependent kinase D-1-like	K02202	cyclin-dependent kinase 7	EC:2.7.11.22 2.7.11.23	bna03420	Nucleotide excision repair	Genetic Information Processing	Replication and repair
TRINITY_DN27697_c0_g3	vra:106776973	47.5	2.6e-85	-	2-hydroxyisoflavanone dehydratase-like	K13258	2-hydroxyisoflavanone dehydratase	EC:4.2.1.105	vra00943	Isoflavonoid biosynthesis	Metabolism	Biosynthesis of other secondary metabolites
TRINITY_DN27697_c0_g4	bna:106405110	45.5	4.6e-68	-	cyclin-dependent kinase D-1-like	K02202	cyclin-dependent kinase 7	EC:2.7.11.22 2.7.11.23	bna03022	Basal transcription factors	Genetic Information Processing	Transcription
TRINITY_DN27697_c0_g4	bna:106405110	45.5	4.6e-68	-	cyclin-dependent kinase D-1-like	K02202	cyclin-dependent kinase 7	EC:2.7.11.22 2.7.11.23	bna03420	Nucleotide excision repair	Genetic Information Processing	Replication and repair
TRINITY_DN27699_c0_g2	fve:101306379	97	1.3e-175	-	glycerol-3-phosphate dehydrogenase [NAD(+)] 2	K00006	glycerol-3-phosphate dehydrogenase (NAD+)	EC:1.1.1.8	fve00564	Glycerophospholipid metabolism	Metabolism	Lipid metabolism
TRINITY_DN27699_c0_g7	vcn:VOLCADRAFT_104207	28.6	4e-22	-	hypothetical protein	K03103	multiple inositol-polyphosphate phosphatase / 2,3-bisphosphoglycerate 3-phosphatase	EC:3.1.3.62 3.1.3.80	vcn00010	Glycolysis / Gluconeogenesis	Metabolism	Carbohydrate metabolism
TRINITY_DN27699_c0_g7	vcn:VOLCADRAFT_104207	28.6	4e-22	-	hypothetical protein	K03103	multiple inositol-polyphosphate phosphatase / 2,3-bisphosphoglycerate 3-phosphatase	EC:3.1.3.62 3.1.3.80	vcn00562	Inositol phosphate metabolism	Metabolism	Carbohydrate metabolism
TRINITY_DN27699_c0_g8	fve:101306379	81.7	4.5e-17	-	glycerol-3-phosphate dehydrogenase [NAD(+)] 2	K00006	glycerol-3-phosphate dehydrogenase (NAD+)	EC:1.1.1.8	fve00564	Glycerophospholipid metabolism	Metabolism	Lipid metabolism
TRINITY_DN27700_c0_g5	gra:105788061	90.4	3.3e-204	-	alpha-1	K13379	reversibly glycosylated polypeptide / UDP-arabinopyranose mutase	EC:2.4.1.- 5.4.99.30	gra00520	Amino sugar and nucleotide sugar metabolism	Metabolism	Carbohydrate metabolism
TRINITY_DN27700_c0_g7	tcc:TCM_014329	87.9	1.8e-43	-	Reversibly glycosylated polypeptide 3	K13379	reversibly glycosylated polypeptide / UDP-arabinopyranose mutase	EC:2.4.1.- 5.4.99.30	tcc00520	Amino sugar and nucleotide sugar metabolism	Metabolism	Carbohydrate metabolism
TRINITY_DN27704_c0_g13	egr:9829714	98.6	1.1e-33	ndhF	NADH-plastoquinone oxidoreductase subunit 5	K05577	NAD(P)H-quinone oxidoreductase subunit 5	EC:1.6.5.3	egr00190	Oxidative phosphorylation	Metabolism	Energy metabolism
TRINITY_DN27704_c0_g14	fve:10251579	97	9.8e-179	ndhF	NADH-plastoquinone oxidoreductase subunit 5	K05577	NAD(P)H-quinone oxidoreductase subunit 5	EC:1.6.5.3	fve00190	Oxidative phosphorylation	Metabolism	Energy metabolism
TRINITY_DN27704_c0_g15	fve:10251579	98.4	1.3e-63	ndhF	NADH-plastoquinone oxidoreductase subunit 5	K05577	NAD(P)H-quinone oxidoreductase subunit 5	EC:1.6.5.3	fve00190	Oxidative phosphorylation	Metabolism	Energy metabolism
TRINITY_DN27704_c0_g16	fve:10251579	50	3.6e-08	ndhF	NADH-plastoquinone oxidoreductase subunit 5	K05577	NAD(P)H-quinone oxidoreductase subunit 5	EC:1.6.5.3	fve00190	Oxidative phosphorylation	Metabolism	Energy metabolism
TRINITY_DN27704_c0_g2	egr:104440434	56.2	4.3e-26	-	uncharacterized LOC104440434	K01876	aspartyl-tRNA synthetase	EC:6.1.1.12	egr00970	Aminoacyl-tRNA biosynthesis	Genetic Information Processing	Translation
TRINITY_DN27704_c0_g3	fve:10251580	98.1	6.2e-21	rpl32	ribosomal protein L32	K02911	large subunit ribosomal protein L32	-	fve03010	Ribosome	Genetic Information Processing	Translation
TRINITY_DN27704_c0_g4	obr:102719869	56.6	8.6e-66	-	lipoyl synthase 2	K03644	lipoyl synthase	EC:2.8.1.8	obr00785	Lipoic acid metabolism	Metabolism	Metabolism of cofactors and vitamins
TRINITY_DN27704_c0_g9	fve:10251579	94.4	1.4e-173	ndhF	NADH-plastoquinone oxidoreductase subunit 5	K05577	NAD(P)H-quinone oxidoreductase subunit 5	EC:1.6.5.3	fve00190	Oxidative phosphorylation	Metabolism	Energy metabolism
TRINITY_DN27706_c0_g11	sita:101752872	33.7	4.2e-09	-	uncharacterized LOC101752872	K01455	formamidase	EC:3.5.1.49	sita01200	Carbon metabolism	Metabolism	Overview
TRINITY_DN27706_c0_g11	sita:101752872	33.7	4.2e-09	-	uncharacterized LOC101752872	K01455	formamidase	EC:3.5.1.49	sita00630	Glyoxylate and dicarboxylate metabolism	Metabolism	Carbohydrate metabolism
TRINITY_DN27706_c0_g11	sita:101752872	33.7	4.2e-09	-	uncharacterized LOC101752872	K01455	formamidase	EC:3.5.1.49	sita00910	Nitrogen metabolism	Metabolism	Energy metabolism
TRINITY_DN27706_c0_g11	sita:101752872	33.7	4.2e-09	-	uncharacterized LOC101752872	K01455	formamidase	EC:3.5.1.49	sita00460	Cyanoamino acid metabolism	Metabolism	Metabolism of other amino acids
TRINITY_DN27708_c0_g1	fve:101306568	93.9	1.2e-259	-	GDP-Man:Man(3)GlcNAc(2)-PP-Dol alpha-1	K03844	alpha-1,2-mannosyltransferase	EC:2.4.1.131	fve00510	N-Glycan biosynthesis	Metabolism	Glycan biosynthesis and metabolism
TRINITY_DN27709_c0_g2	fve:101309417	92.6	2e-06	-	dnaJ protein homolog	K09503	DnaJ homolog subfamily A member 2	-	fve04141	Protein processing in endoplasmic reticulum	Genetic Information Processing	Folding, sorting and degradation
TRINITY_DN27710_c0_g2	brp:103855161	36.8	9.4e-65	-	DELLA protein RGL2	K14494	DELLA protein	-	brp04075	Plant hormone signal transduction	Environmental Information Processing	Signal transduction
TRINITY_DN27710_c0_g4	cit:102609257	40.2	2.3e-11	-	protein disulfide isomerase-like 2-3-like	K09584	protein disulfide-isomerase A6	EC:5.3.4.1	cit04141	Protein processing in endoplasmic reticulum	Genetic Information Processing	Folding, sorting and degradation
TRINITY_DN27717_c2_g4	fve:101299440	95.6	0	-	diacylglycerol kinase 2	K00901	diacylglycerol kinase (ATP)	EC:2.7.1.107	fve00561	Glycerolipid metabolism	Metabolism	Lipid metabolism
TRINITY_DN27717_c2_g4	fve:101299440	95.6	0	-	diacylglycerol kinase 2	K00901	diacylglycerol kinase (ATP)	EC:2.7.1.107	fve00564	Glycerophospholipid metabolism	Metabolism	Lipid metabolism
TRINITY_DN27717_c2_g4	fve:101299440	95.6	0	-	diacylglycerol kinase 2	K00901	diacylglycerol kinase (ATP)	EC:2.7.1.107	fve04070	Phosphatidylinositol signaling system	Environmental Information Processing	Signal transduction
TRINITY_DN27718_c0_g1	fve:101313585	93.5	0	-	lysosomal beta glucosidase-like	K05349	beta-glucosidase	EC:3.2.1.21	fve00500	Starch and sucrose metabolism	Metabolism	Carbohydrate metabolism
TRINITY_DN27718_c0_g1	fve:101313585	93.5	0	-	lysosomal beta glucosidase-like	K05349	beta-glucosidase	EC:3.2.1.21	fve00460	Cyanoamino acid metabolism	Metabolism	Metabolism of other amino acids
TRINITY_DN27718_c0_g1	fve:101313585	93.5	0	-	lysosomal beta glucosidase-like	K05349	beta-glucosidase	EC:3.2.1.21	fve00940	Phenylpropanoid biosynthesis	Metabolism	Biosynthesis of other secondary metabolites
TRINITY_DN27719_c1_g3	rcu:RCOM_1616660	52.7	1.9e-09	-	WRKY transcription factor	K13425	WRKY transcription factor 22	-	rcu04626	Plant-pathogen interaction	Organismal Systems	Environmental adaptation
TRINITY_DN27721_c0_g1	nnu:104612218	89	1.3e-203	-	putative proline--tRNA ligase C19C7.06	K01881	prolyl-tRNA synthetase	EC:6.1.1.15	nnu00970	Aminoacyl-tRNA biosynthesis	Genetic Information Processing	Translation
TRINITY_DN27721_c0_g2	cmo:103503756	93.7	7e-51	-	putative proline--tRNA ligase C19C7.06	K01881	prolyl-tRNA synthetase	EC:6.1.1.15	cmo00970	Aminoacyl-tRNA biosynthesis	Genetic Information Processing	Translation
TRINITY_DN27721_c0_g3	fve:101305457	95.6	3.5e-280	-	putative proline--tRNA ligase C19C7.06	K01881	prolyl-tRNA synthetase	EC:6.1.1.15	fve00970	Aminoacyl-tRNA biosynthesis	Genetic Information Processing	Translation
TRINITY_DN27722_c0_g1	vvi:100266256	89.6	7.7e-273	-	3-ketoacyl-CoA synthase 11-like	K15397	3-ketoacyl-CoA synthase	EC:2.3.1.199	vvi00062	Fatty acid elongation	Metabolism	Lipid metabolism
TRINITY_DN27723_c0_g3	bna:106394339	47	4.9e-16	-	uncharacterized LOC106394339	K01188	beta-glucosidase	EC:3.2.1.21	bna00500	Starch and sucrose metabolism	Metabolism	Carbohydrate metabolism
TRINITY_DN27723_c0_g3	bna:106394339	47	4.9e-16	-	uncharacterized LOC106394339	K01188	beta-glucosidase	EC:3.2.1.21	bna00460	Cyanoamino acid metabolism	Metabolism	Metabolism of other amino acids
TRINITY_DN27723_c0_g3	bna:106394339	47	4.9e-16	-	uncharacterized LOC106394339	K01188	beta-glucosidase	EC:3.2.1.21	bna00940	Phenylpropanoid biosynthesis	Metabolism	Biosynthesis of other secondary metabolites
TRINITY_DN27724_c0_g2	gmx:100803042	32.9	6.8e-33	-	chitin elicitor receptor kinase 1-like	K13429	chitin elicitor receptor kinase 1	-	gmx04626	Plant-pathogen interaction	Organismal Systems	Environmental adaptation
TRINITY_DN27725_c0_g1	gmx:100794508	51.2	1e-16	-	G-type lectin S-receptor-like serine/threonine-protein kinase CES101	K01183	chitinase	EC:3.2.1.14	gmx00520	Amino sugar and nucleotide sugar metabolism	Metabolism	Carbohydrate metabolism
TRINITY_DN27725_c1_g1	gmx:100794508	44.7	8.1e-110	-	G-type lectin S-receptor-like serine/threonine-protein kinase CES101	K01183	chitinase	EC:3.2.1.14	gmx00520	Amino sugar and nucleotide sugar metabolism	Metabolism	Carbohydrate metabolism
TRINITY_DN27725_c1_g3	gmx:100794508	53.8	3.2e-96	-	G-type lectin S-receptor-like serine/threonine-protein kinase CES101	K01183	chitinase	EC:3.2.1.14	gmx00520	Amino sugar and nucleotide sugar metabolism	Metabolism	Carbohydrate metabolism
TRINITY_DN27727_c1_g2	fve:101305627	97.7	2.3e-281	cyp51	obtusifoliol 14-alpha demethylase	K05917	sterol 14-demethylase	EC:1.14.13.70	fve00100	Steroid biosynthesis	Metabolism	Lipid metabolism
TRINITY_DN27727_c1_g3	fve:101299500	93.1	1.5e-88	-	transcription initiation factor TFIID subunit 9	K03133	transcription initiation factor TFIID subunit 9B	-	fve03022	Basal transcription factors	Genetic Information Processing	Transcription
TRINITY_DN27729_c0_g1	crb:CARUB_v10015606mg	39.9	3.6e-66	-	hypothetical protein	K01599	uroporphyrinogen decarboxylase	EC:4.1.1.37	crb00860	Porphyrin and chlorophyll metabolism	Metabolism	Metabolism of cofactors and vitamins
TRINITY_DN27729_c0_g2	eus:EUTSA_v10022319mg	39.8	6.6e-72	-	hypothetical protein	K01599	uroporphyrinogen decarboxylase	EC:4.1.1.37	eus00860	Porphyrin and chlorophyll metabolism	Metabolism	Metabolism of cofactors and vitamins
TRINITY_DN27729_c0_g3	eus:EUTSA_v10022319mg	34.1	6.8e-86	-	hypothetical protein	K01599	uroporphyrinogen decarboxylase	EC:4.1.1.37	eus00860	Porphyrin and chlorophyll metabolism	Metabolism	Metabolism of cofactors and vitamins
TRINITY_DN27730_c0_g1	fve:101303737	94.1	0	-	gamma-glutamyltranspeptidase 3	K18592	gamma-glutamyltranspeptidase / glutathione hydrolase / leukotriene-C4 hydrolase	EC:2.3.2.2 3.4.19.13 3.4.19.14	fve00590	Arachidonic acid metabolism	Metabolism	Lipid metabolism
TRINITY_DN27730_c0_g1	fve:101303737	94.1	0	-	gamma-glutamyltranspeptidase 3	K18592	gamma-glutamyltranspeptidase / glutathione hydrolase / leukotriene-C4 hydrolase	EC:2.3.2.2 3.4.19.13 3.4.19.14	fve00430	Taurine and hypotaurine metabolism	Metabolism	Metabolism of other amino acids
TRINITY_DN27730_c0_g1	fve:101303737	94.1	0	-	gamma-glutamyltranspeptidase 3	K18592	gamma-glutamyltranspeptidase / glutathione hydrolase / leukotriene-C4 hydrolase	EC:2.3.2.2 3.4.19.13 3.4.19.14	fve00460	Cyanoamino acid metabolism	Metabolism	Metabolism of other amino acids
TRINITY_DN27730_c0_g1	fve:101303737	94.1	0	-	gamma-glutamyltranspeptidase 3	K18592	gamma-glutamyltranspeptidase / glutathione hydrolase / leukotriene-C4 hydrolase	EC:2.3.2.2 3.4.19.13 3.4.19.14	fve00480	Glutathione metabolism	Metabolism	Metabolism of other amino acids
TRINITY_DN27730_c0_g2	nnu:104602326	63.8	6.4e-68	-	small heat shock protein	K13993	HSP20 family protein	-	nnu04141	Protein processing in endoplasmic reticulum	Genetic Information Processing	Folding, sorting and degradation
TRINITY_DN27730_c0_g4	sot:102601941	88.7	2.5e-30	calmodulin	calmodulin-2/4-like	K02183	calmodulin	-	sot04070	Phosphatidylinositol signaling system	Environmental Information Processing	Signal transduction
TRINITY_DN27730_c0_g4	sot:102601941	88.7	2.5e-30	calmodulin	calmodulin-2/4-like	K02183	calmodulin	-	sot04626	Plant-pathogen interaction	Organismal Systems	Environmental adaptation
TRINITY_DN27731_c0_g1	fve:101293604	81	6.3e-256	-	dol-P-Glc:Glc(2)Man(9)GlcNAc(2)-PP-Dol alpha-1	K03850	alpha-1,2-glucosyltransferase	EC:2.4.1.256	fve00510	N-Glycan biosynthesis	Metabolism	Glycan biosynthesis and metabolism
TRINITY_DN27734_c1_g4	sita:101769517	52.2	2.7e-15	-	glucan endo-1	K19893	glucan endo-1,3-beta-glucosidase 5/6	EC:3.2.1.39	sita00500	Starch and sucrose metabolism	Metabolism	Carbohydrate metabolism
TRINITY_DN27734_c1_g9	cam:101496323	52.4	8.5e-119	-	glucan endo-1	K19893	glucan endo-1,3-beta-glucosidase 5/6	EC:3.2.1.39	cam00500	Starch and sucrose metabolism	Metabolism	Carbohydrate metabolism
TRINITY_DN27735_c0_g1	fve:101301625	94.7	2.6e-215	-	NADH dehydrogenase [ubiquinone] 1 alpha subcomplex subunit 9	K03953	NADH dehydrogenase (ubiquinone) 1 alpha subcomplex subunit 9	-	fve00190	Oxidative phosphorylation	Metabolism	Energy metabolism
TRINITY_DN27737_c1_g4	atr:18429709	28.7	7.9e-07	-	protein HOMOLOG OF MAMMALIAN LYST-INTERACTING PROTEIN 5	K12199	vacuolar protein sorting-associated protein VTA1	-	atr04144	Endocytosis	Cellular Processes	Transport and catabolism
TRINITY_DN27738_c0_g1	eus:EUTSA_v10022319mg	60.9	5.5e-132	-	hypothetical protein	K01599	uroporphyrinogen decarboxylase	EC:4.1.1.37	eus00860	Porphyrin and chlorophyll metabolism	Metabolism	Metabolism of cofactors and vitamins
TRINITY_DN27738_c0_g2	eus:EUTSA_v10022319mg	58.3	3.7e-42	-	hypothetical protein	K01599	uroporphyrinogen decarboxylase	EC:4.1.1.37	eus00860	Porphyrin and chlorophyll metabolism	Metabolism	Metabolism of cofactors and vitamins
TRINITY_DN27741_c0_g3	pper:PRUPE_ppa007912mg	99.2	1.1e-141	-	hypothetical protein	K02146	V-type H+-transporting ATPase subunit d	-	pper00190	Oxidative phosphorylation	Metabolism	Energy metabolism
TRINITY_DN27741_c0_g3	pper:PRUPE_ppa007912mg	99.2	1.1e-141	-	hypothetical protein	K02146	V-type H+-transporting ATPase subunit d	-	pper04145	Phagosome	Cellular Processes	Transport and catabolism
TRINITY_DN27741_c0_g4	gra:105798263	96.6	1.9e-200	-	V-type proton ATPase subunit d2	K02146	V-type H+-transporting ATPase subunit d	-	gra00190	Oxidative phosphorylation	Metabolism	Energy metabolism
TRINITY_DN27741_c0_g4	gra:105798263	96.6	1.9e-200	-	V-type proton ATPase subunit d2	K02146	V-type H+-transporting ATPase subunit d	-	gra04145	Phagosome	Cellular Processes	Transport and catabolism
TRINITY_DN27742_c0_g1	zma:541977	39.3	2.2e-74	bx6	benzoxazin 6	K13229	2,4-dihydroxy-1,4-benzoxazin-3-one-glucoside dioxygenase	EC:1.14.20.2	zma00402	Benzoxazinoid biosynthesis	Metabolism	Biosynthesis of other secondary metabolites
TRINITY_DN27744_c1_g5	fve:101303481	63.2	1.8e-11	-	inactive beta-amylase 4	K01177	beta-amylase	EC:3.2.1.2	fve00500	Starch and sucrose metabolism	Metabolism	Carbohydrate metabolism
TRINITY_DN27745_c1_g1	fve:101299375	94.6	0	-	beta-galactosidase 17	K12309	beta-galactosidase	EC:3.2.1.23	fve00052	Galactose metabolism	Metabolism	Carbohydrate metabolism
TRINITY_DN27745_c1_g1	fve:101299375	94.6	0	-	beta-galactosidase 17	K12309	beta-galactosidase	EC:3.2.1.23	fve00600	Sphingolipid metabolism	Metabolism	Lipid metabolism
TRINITY_DN27745_c1_g1	fve:101299375	94.6	0	-	beta-galactosidase 17	K12309	beta-galactosidase	EC:3.2.1.23	fve00531	Glycosaminoglycan degradation	Metabolism	Glycan biosynthesis and metabolism
TRINITY_DN27745_c1_g1	fve:101299375	94.6	0	-	beta-galactosidase 17	K12309	beta-galactosidase	EC:3.2.1.23	fve00604	Glycosphingolipid biosynthesis - ganglio series	Metabolism	Glycan biosynthesis and metabolism
TRINITY_DN27745_c1_g1	fve:101299375	94.6	0	-	beta-galactosidase 17	K12309	beta-galactosidase	EC:3.2.1.23	fve00511	Other glycan degradation	Metabolism	Glycan biosynthesis and metabolism
TRINITY_DN27747_c0_g1	fve:101303829	88.9	0	-	histone-lysine N-methyltransferase	K11420	euchromatic histone-lysine N-methyltransferase	EC:2.1.1.43	fve00310	Lysine degradation	Metabolism	Amino acid metabolism
TRINITY_DN27747_c0_g3	fve:101300548	81.1	6.8e-131	-	2-aminoethanethiol dioxygenase-like	K10712	cysteamine dioxygenase	EC:1.13.11.19	fve00430	Taurine and hypotaurine metabolism	Metabolism	Metabolism of other amino acids
TRINITY_DN27748_c0_g3	vvi:100243389	80.3	2.5e-280	-	cycloartenol Synthase	K01853	cycloartenol synthase	EC:5.4.99.8	vvi00100	Steroid biosynthesis	Metabolism	Lipid metabolism
TRINITY_DN27748_c0_g5	sita:101760718	50.3	9.5e-36	-	triosephosphate isomerase	K01803	triosephosphate isomerase (TIM)	EC:5.3.1.1	sita01200	Carbon metabolism	Metabolism	Overview
TRINITY_DN27748_c0_g5	sita:101760718	50.3	9.5e-36	-	triosephosphate isomerase	K01803	triosephosphate isomerase (TIM)	EC:5.3.1.1	sita01230	Biosynthesis of amino acids	Metabolism	Overview
TRINITY_DN27748_c0_g5	sita:101760718	50.3	9.5e-36	-	triosephosphate isomerase	K01803	triosephosphate isomerase (TIM)	EC:5.3.1.1	sita00010	Glycolysis / Gluconeogenesis	Metabolism	Carbohydrate metabolism
TRINITY_DN27748_c0_g5	sita:101760718	50.3	9.5e-36	-	triosephosphate isomerase	K01803	triosephosphate isomerase (TIM)	EC:5.3.1.1	sita00051	Fructose and mannose metabolism	Metabolism	Carbohydrate metabolism
TRINITY_DN27748_c0_g5	sita:101760718	50.3	9.5e-36	-	triosephosphate isomerase	K01803	triosephosphate isomerase (TIM)	EC:5.3.1.1	sita00562	Inositol phosphate metabolism	Metabolism	Carbohydrate metabolism
TRINITY_DN27748_c0_g5	sita:101760718	50.3	9.5e-36	-	triosephosphate isomerase	K01803	triosephosphate isomerase (TIM)	EC:5.3.1.1	sita00710	Carbon fixation in photosynthetic organisms	Metabolism	Energy metabolism
TRINITY_DN27748_c0_g6	nnu:104588379	81.6	6.8e-88	-	cycloartenol synthase 2	K01853	cycloartenol synthase	EC:5.4.99.8	nnu00100	Steroid biosynthesis	Metabolism	Lipid metabolism
TRINITY_DN27749_c0_g6	egr:104427204	39.7	2.6e-09	-	acyl carrier protein 2	K03955	NADH dehydrogenase (ubiquinone) 1 alpha/beta subcomplex 1	-	egr00190	Oxidative phosphorylation	Metabolism	Energy metabolism
TRINITY_DN27750_c1_g1	mdm:103455132	57.7	1.5e-39	-	uncharacterized LOC103455132	K01940	argininosuccinate synthase	EC:6.3.4.5	mdm01230	Biosynthesis of amino acids	Metabolism	Overview
TRINITY_DN27750_c1_g1	mdm:103455132	57.7	1.5e-39	-	uncharacterized LOC103455132	K01940	argininosuccinate synthase	EC:6.3.4.5	mdm00250	Alanine, aspartate and glutamate metabolism	Metabolism	Amino acid metabolism
TRINITY_DN27750_c1_g1	mdm:103455132	57.7	1.5e-39	-	uncharacterized LOC103455132	K01940	argininosuccinate synthase	EC:6.3.4.5	mdm00220	Arginine biosynthesis	Metabolism	Amino acid metabolism
TRINITY_DN27751_c0_g1	mtr:MTR_0267s0070	40.1	6.2e-31	-	NB-ARC domain disease resistance protein	K12818	ATP-dependent RNA helicase DHX8/PRP22	EC:3.6.4.13	mtr03040	Spliceosome	Genetic Information Processing	Transcription
TRINITY_DN27751_c0_g2	mdm:103447654	58.9	3.2e-55	-	anthranilate synthase alpha subunit 1	K01657	anthranilate synthase component I	EC:4.1.3.27	mdm01230	Biosynthesis of amino acids	Metabolism	Overview
TRINITY_DN27751_c0_g2	mdm:103447654	58.9	3.2e-55	-	anthranilate synthase alpha subunit 1	K01657	anthranilate synthase component I	EC:4.1.3.27	mdm00400	Phenylalanine, tyrosine and tryptophan biosynthesis	Metabolism	Amino acid metabolism
TRINITY_DN27751_c0_g3	mdm:103447654	68.8	2.4e-39	-	anthranilate synthase alpha subunit 1	K01657	anthranilate synthase component I	EC:4.1.3.27	mdm01230	Biosynthesis of amino acids	Metabolism	Overview
TRINITY_DN27751_c0_g3	mdm:103447654	68.8	2.4e-39	-	anthranilate synthase alpha subunit 1	K01657	anthranilate synthase component I	EC:4.1.3.27	mdm00400	Phenylalanine, tyrosine and tryptophan biosynthesis	Metabolism	Amino acid metabolism
TRINITY_DN27751_c0_g5	mtr:MTR_0267s0070	42.2	9.6e-16	-	NB-ARC domain disease resistance protein	K12818	ATP-dependent RNA helicase DHX8/PRP22	EC:3.6.4.13	mtr03040	Spliceosome	Genetic Information Processing	Transcription
TRINITY_DN27752_c0_g1	fve:101302508	78.1	1.7e-123	-	auxin-responsive protein IAA11-like	K14484	auxin-responsive protein IAA	-	fve04075	Plant hormone signal transduction	Environmental Information Processing	Signal transduction
TRINITY_DN27753_c0_g1	bvg:104885815	93.3	2.7e-104	-	actin-85C	K05692	actin beta/gamma 1	-	bvg04145	Phagosome	Cellular Processes	Transport and catabolism
TRINITY_DN27753_c0_g2	pda:103700236	87.5	1.9e-128	-	actin	K05692	actin beta/gamma 1	-	pda04145	Phagosome	Cellular Processes	Transport and catabolism
TRINITY_DN27753_c0_g3	bvg:104885815	91.5	3e-68	-	actin-85C	K05692	actin beta/gamma 1	-	bvg04145	Phagosome	Cellular Processes	Transport and catabolism
TRINITY_DN27753_c0_g4	bvg:104885815	91.4	1.1e-71	-	actin-85C	K05692	actin beta/gamma 1	-	bvg04145	Phagosome	Cellular Processes	Transport and catabolism
TRINITY_DN27753_c0_g5	gsl:Gasu_17630	83.3	1.6e-182	-	actin	K05692	actin beta/gamma 1	-	gsl04145	Phagosome	Cellular Processes	Transport and catabolism
TRINITY_DN27754_c0_g1	mdm:103446271	41.7	2.7e-30	-	uncharacterized LOC103446271	K13506	glycerol-3-phosphate O-acyltransferase 3/4	EC:2.3.1.15	mdm00561	Glycerolipid metabolism	Metabolism	Lipid metabolism
TRINITY_DN27754_c0_g1	mdm:103446271	41.7	2.7e-30	-	uncharacterized LOC103446271	K13506	glycerol-3-phosphate O-acyltransferase 3/4	EC:2.3.1.15	mdm00564	Glycerophospholipid metabolism	Metabolism	Lipid metabolism
TRINITY_DN27755_c1_g3	pper:PRUPE_ppa000541mg	51.5	4.1e-11	-	hypothetical protein	K11420	euchromatic histone-lysine N-methyltransferase	EC:2.1.1.43	pper00310	Lysine degradation	Metabolism	Amino acid metabolism
TRINITY_DN27757_c0_g1	gmx:100779584	91.5	8.9e-17	-	UDP-glucuronic acid decarboxylase 1-like	K08678	UDP-glucuronate decarboxylase	EC:4.1.1.35	gmx00500	Starch and sucrose metabolism	Metabolism	Carbohydrate metabolism
TRINITY_DN27757_c0_g1	gmx:100779584	91.5	8.9e-17	-	UDP-glucuronic acid decarboxylase 1-like	K08678	UDP-glucuronate decarboxylase	EC:4.1.1.35	gmx00520	Amino sugar and nucleotide sugar metabolism	Metabolism	Carbohydrate metabolism
TRINITY_DN27760_c0_g1	fve:101314634	90.9	6.9e-40	-	40S ribosomal protein S14	K02955	small subunit ribosomal protein S14e	-	fve03010	Ribosome	Genetic Information Processing	Translation
TRINITY_DN27760_c0_g2	egu:105038176	100	1.2e-48	-	small nuclear ribonucleoprotein Sm D1-like	K11087	small nuclear ribonucleoprotein D1	-	egu03040	Spliceosome	Genetic Information Processing	Transcription
TRINITY_DN27760_c0_g3	pper:PRUPE_ppa013592mg	96.4	4.1e-38	-	hypothetical protein	K11087	small nuclear ribonucleoprotein D1	-	pper03040	Spliceosome	Genetic Information Processing	Transcription
TRINITY_DN27760_c0_g4	pper:PRUPE_ppa013592mg	99	8.9e-49	-	hypothetical protein	K11087	small nuclear ribonucleoprotein D1	-	pper03040	Spliceosome	Genetic Information Processing	Transcription
TRINITY_DN27760_c0_g7	fve:105350241	88.6	1.3e-35	-	cytochrome P450 710A1-like	K09832	sterol 22-desaturase	EC:1.14.19.41	fve00100	Steroid biosynthesis	Metabolism	Lipid metabolism
TRINITY_DN27762_c0_g1	mtr:MTR_4g021520	36.1	1.9e-84	-	1-O-acylglucose:anthocyanin acyltransferase	K09756	serine carboxypeptidase-like 19	EC:3.4.16.- 2.3.1.91	mtr00940	Phenylpropanoid biosynthesis	Metabolism	Biosynthesis of other secondary metabolites
TRINITY_DN27769_c0_g3	fve:101293303	87.2	1e-142	-	2-C-methyl-D-erythritol 4-phosphate cytidylyltransferase	K00991	2-C-methyl-D-erythritol 4-phosphate cytidylyltransferase	EC:2.7.7.60	fve00900	Terpenoid backbone biosynthesis	Metabolism	Metabolism of terpenoids and polyketides
TRINITY_DN27769_c0_g4	fve:101304039	95.1	1.5e-25	-	TATA-box-binding protein 1	K03120	transcription initiation factor TFIID TATA-box-binding protein	-	fve03022	Basal transcription factors	Genetic Information Processing	Transcription
TRINITY_DN27769_c0_g5	pper:PRUPE_ppa011711mg	97	4.6e-105	-	hypothetical protein	K03120	transcription initiation factor TFIID TATA-box-binding protein	-	pper03022	Basal transcription factors	Genetic Information Processing	Transcription
TRINITY_DN27770_c0_g1	vvi:100250174	91.7	3.3e-96	-	DNA repair helicase XPB1	K10843	DNA excision repair protein ERCC-3	EC:3.6.4.12	vvi03022	Basal transcription factors	Genetic Information Processing	Transcription
TRINITY_DN27770_c0_g1	vvi:100250174	91.7	3.3e-96	-	DNA repair helicase XPB1	K10843	DNA excision repair protein ERCC-3	EC:3.6.4.12	vvi03420	Nucleotide excision repair	Genetic Information Processing	Replication and repair
TRINITY_DN27770_c0_g3	nnu:104610652	99.3	2e-76	-	DNA repair helicase XPB1	K10843	DNA excision repair protein ERCC-3	EC:3.6.4.12	nnu03022	Basal transcription factors	Genetic Information Processing	Transcription
TRINITY_DN27770_c0_g3	nnu:104610652	99.3	2e-76	-	DNA repair helicase XPB1	K10843	DNA excision repair protein ERCC-3	EC:3.6.4.12	nnu03420	Nucleotide excision repair	Genetic Information Processing	Replication and repair
TRINITY_DN27770_c0_g5	fve:101312439	97.9	0	-	DNA repair helicase XPB1-like	K10843	DNA excision repair protein ERCC-3	EC:3.6.4.12	fve03022	Basal transcription factors	Genetic Information Processing	Transcription
TRINITY_DN27770_c0_g5	fve:101312439	97.9	0	-	DNA repair helicase XPB1-like	K10843	DNA excision repair protein ERCC-3	EC:3.6.4.12	fve03420	Nucleotide excision repair	Genetic Information Processing	Replication and repair
TRINITY_DN27771_c0_g1	cmo:103484538	72.5	2.5e-55	-	bifunctional epoxide hydrolase 2-like	K08726	soluble epoxide hydrolase / lipid-phosphate phosphatase	EC:3.3.2.10 3.1.3.76	cmo00590	Arachidonic acid metabolism	Metabolism	Lipid metabolism
TRINITY_DN27771_c0_g1	cmo:103484538	72.5	2.5e-55	-	bifunctional epoxide hydrolase 2-like	K08726	soluble epoxide hydrolase / lipid-phosphate phosphatase	EC:3.3.2.10 3.1.3.76	cmo04146	Peroxisome	Cellular Processes	Transport and catabolism
TRINITY_DN27771_c0_g2	cmo:103484538	69.3	2.4e-132	-	bifunctional epoxide hydrolase 2-like	K08726	soluble epoxide hydrolase / lipid-phosphate phosphatase	EC:3.3.2.10 3.1.3.76	cmo00590	Arachidonic acid metabolism	Metabolism	Lipid metabolism
TRINITY_DN27771_c0_g2	cmo:103484538	69.3	2.4e-132	-	bifunctional epoxide hydrolase 2-like	K08726	soluble epoxide hydrolase / lipid-phosphate phosphatase	EC:3.3.2.10 3.1.3.76	cmo04146	Peroxisome	Cellular Processes	Transport and catabolism
TRINITY_DN27771_c0_g3	cmo:103484538	82.5	2.3e-13	-	bifunctional epoxide hydrolase 2-like	K08726	soluble epoxide hydrolase / lipid-phosphate phosphatase	EC:3.3.2.10 3.1.3.76	cmo00590	Arachidonic acid metabolism	Metabolism	Lipid metabolism
TRINITY_DN27771_c0_g3	cmo:103484538	82.5	2.3e-13	-	bifunctional epoxide hydrolase 2-like	K08726	soluble epoxide hydrolase / lipid-phosphate phosphatase	EC:3.3.2.10 3.1.3.76	cmo04146	Peroxisome	Cellular Processes	Transport and catabolism
TRINITY_DN27771_c0_g4	cmo:103484538	64.9	2.9e-123	-	bifunctional epoxide hydrolase 2-like	K08726	soluble epoxide hydrolase / lipid-phosphate phosphatase	EC:3.3.2.10 3.1.3.76	cmo00590	Arachidonic acid metabolism	Metabolism	Lipid metabolism
TRINITY_DN27771_c0_g4	cmo:103484538	64.9	2.9e-123	-	bifunctional epoxide hydrolase 2-like	K08726	soluble epoxide hydrolase / lipid-phosphate phosphatase	EC:3.3.2.10 3.1.3.76	cmo04146	Peroxisome	Cellular Processes	Transport and catabolism
TRINITY_DN27772_c0_g1	fve:101307925	93.8	1.2e-150	-	putative formamidase C869.04	K01455	formamidase	EC:3.5.1.49	fve01200	Carbon metabolism	Metabolism	Overview
TRINITY_DN27772_c0_g1	fve:101307925	93.8	1.2e-150	-	putative formamidase C869.04	K01455	formamidase	EC:3.5.1.49	fve00630	Glyoxylate and dicarboxylate metabolism	Metabolism	Carbohydrate metabolism
TRINITY_DN27772_c0_g1	fve:101307925	93.8	1.2e-150	-	putative formamidase C869.04	K01455	formamidase	EC:3.5.1.49	fve00910	Nitrogen metabolism	Metabolism	Energy metabolism
TRINITY_DN27772_c0_g1	fve:101307925	93.8	1.2e-150	-	putative formamidase C869.04	K01455	formamidase	EC:3.5.1.49	fve00460	Cyanoamino acid metabolism	Metabolism	Metabolism of other amino acids
TRINITY_DN27773_c1_g1	cre:CHLREDRAFT_195448	48.9	8.9e-31	AP2S2	Sigma2-Adaptin	K11827	AP-2 complex subunit sigma-1	-	cre04144	Endocytosis	Cellular Processes	Transport and catabolism
TRINITY_DN27773_c3_g2	fve:101294226	78.6	1.6e-124	-	putative E3 ubiquitin-protein ligase SINA-like 6	K04506	E3 ubiquitin-protein ligase SIAH1	EC:2.3.2.27	fve04120	Ubiquitin mediated proteolysis	Genetic Information Processing	Folding, sorting and degradation
TRINITY_DN27773_c3_g3	fve:101313707	74.3	5e-08	-	quinolinate synthase	K03517	quinolinate synthase	EC:2.5.1.72	fve00760	Nicotinate and nicotinamide metabolism	Metabolism	Metabolism of cofactors and vitamins
TRINITY_DN27773_c3_g8	fve:101313707	53.8	5.6e-14	-	quinolinate synthase	K03517	quinolinate synthase	EC:2.5.1.72	fve00760	Nicotinate and nicotinamide metabolism	Metabolism	Metabolism of cofactors and vitamins
TRINITY_DN27775_c0_g5	cvr:CHLNCDRAFT_25365	53.7	1.2e-45	-	hypothetical protein	K11422	histone-lysine N-methyltransferase SETD1	EC:2.1.1.43	cvr00310	Lysine degradation	Metabolism	Amino acid metabolism
TRINITY_DN27776_c0_g1	brp:103833404	55.9	1.4e-09	-	mitochondrial inner membrane protein OXA1-like	K03217	YidC/Oxa1 family membrane protein insertase	-	brp03060	Protein export	Genetic Information Processing	Folding, sorting and degradation
TRINITY_DN27777_c0_g1	mis:MICPUN_88269	34.3	7.1e-103	-	hypothetical protein	K14006	protein transport protein SEC23	-	mis04141	Protein processing in endoplasmic reticulum	Genetic Information Processing	Folding, sorting and degradation
TRINITY_DN27777_c0_g2	mis:MICPUN_88269	47.2	2.6e-53	-	hypothetical protein	K14006	protein transport protein SEC23	-	mis04141	Protein processing in endoplasmic reticulum	Genetic Information Processing	Folding, sorting and degradation
TRINITY_DN27777_c0_g4	mis:MICPUN_88269	35.1	2.2e-06	-	hypothetical protein	K14006	protein transport protein SEC23	-	mis04141	Protein processing in endoplasmic reticulum	Genetic Information Processing	Folding, sorting and degradation
TRINITY_DN27780_c0_g2	cvr:CHLNCDRAFT_58991	36.9	2.3e-46	-	hypothetical protein	K01687	dihydroxy-acid dehydratase	EC:4.2.1.9	cvr01210	2-Oxocarboxylic acid metabolism	Metabolism	Overview
TRINITY_DN27780_c0_g2	cvr:CHLNCDRAFT_58991	36.9	2.3e-46	-	hypothetical protein	K01687	dihydroxy-acid dehydratase	EC:4.2.1.9	cvr01230	Biosynthesis of amino acids	Metabolism	Overview
TRINITY_DN27780_c0_g2	cvr:CHLNCDRAFT_58991	36.9	2.3e-46	-	hypothetical protein	K01687	dihydroxy-acid dehydratase	EC:4.2.1.9	cvr00290	Valine, leucine and isoleucine biosynthesis	Metabolism	Amino acid metabolism
TRINITY_DN27780_c0_g2	cvr:CHLNCDRAFT_58991	36.9	2.3e-46	-	hypothetical protein	K01687	dihydroxy-acid dehydratase	EC:4.2.1.9	cvr00770	Pantothenate and CoA biosynthesis	Metabolism	Metabolism of cofactors and vitamins
TRINITY_DN27780_c0_g3	cvr:CHLNCDRAFT_58991	36.7	1e-45	-	hypothetical protein	K01687	dihydroxy-acid dehydratase	EC:4.2.1.9	cvr01210	2-Oxocarboxylic acid metabolism	Metabolism	Overview
TRINITY_DN27780_c0_g3	cvr:CHLNCDRAFT_58991	36.7	1e-45	-	hypothetical protein	K01687	dihydroxy-acid dehydratase	EC:4.2.1.9	cvr01230	Biosynthesis of amino acids	Metabolism	Overview
TRINITY_DN27780_c0_g3	cvr:CHLNCDRAFT_58991	36.7	1e-45	-	hypothetical protein	K01687	dihydroxy-acid dehydratase	EC:4.2.1.9	cvr00290	Valine, leucine and isoleucine biosynthesis	Metabolism	Amino acid metabolism
TRINITY_DN27780_c0_g3	cvr:CHLNCDRAFT_58991	36.7	1e-45	-	hypothetical protein	K01687	dihydroxy-acid dehydratase	EC:4.2.1.9	cvr00770	Pantothenate and CoA biosynthesis	Metabolism	Metabolism of cofactors and vitamins
[truncated: 24,280 more rows]
