# Supplementary material for: Transcriptome and De Novo Analysis of Rosa xanthina f. spontanea&nbsp;in Response to Cold Stress
Source: Research Square preprint supplement (doi:10.21203/rs.3.rs-199455/v1), 2021-02-16
Supplement: Supplementary file 2 [file 346f8aa4d4e01e7f5e2c35cc.xlsx]

## Sheet: PGR5
Temperature	Cq value	Cq SD	Cq value	Cq SD	RQ	RQ CV	RQ	RQ CV	Expression	Expression SD
23℃	13.74	0.2	25.89	0.27	1	0.138629	1	0.18715	1	0.232902
4℃	12.17	0.17	29.22	0.37	2.96905	0.117835	0.0994421	0.256464	0.0334929	0.00945302
-20℃	19.1	0.14	28.95	0.26	0.0243489	0.0970406	0.119908	0.180218	4.92458	1.00798

## Sheet: CHLH
Temperature	Cq value	Cq SD	Cq value	Cq SD	RQ	RQ CV	RQ	RQ CV	Expression	Expression SD
23℃	13.74	0.2	26.7	0.32	1	0.138629	1	0.221807	1	0.261565
4℃	12.17	0.17	24.19	0.18	2.96905	0.117835	5.6962	0.124766	1.91853	0.329249
-20℃	19.1	0.14	29.76	0.35	0.0243489	0.0970406	0.119908	0.242602	4.92458	1.28674

## Sheet: BBX24
Temperature	Cq value	Cq SD	Cq value	Cq SD	RQ	RQ CV	RQ	RQ CV	Expression	Expression SD
23℃	13.74	0.2	22.38	0.16	1	0.138629	1	0.110904	1	0.177532
4℃	12.17	0.17	22.12	0.07	2.96905	0.117835	1.19748	0.0485203	0.403321	0.0513966
-20℃	19.1	0.14	27.36	0.06	0.0243489	0.0970406	0.0316862	0.0415888	1.30134	0.137392

## Sheet: STN7
Temperature	Cq value	Cq SD	Cq value	Cq SD	RQ	RQ CV	RQ	RQ CV	Expression	Expression SD
23℃	13.74	0.2	24.37	0.08	1	0.138629	1	0.0554518	1	0.149308
4℃	12.17	0.17	23.31	0.07	2.96905	0.117835	2.08493	0.0485203	0.702222	0.0894867
-20℃	19.1	0.14	28.18	0.4	0.0243489	0.0970406	0.0712977	0.277259	2.92817	0.860152

## Sheet: EXPA8
Temperature	Cq value	Cq SD	Cq value	Cq SD	RQ	RQ CV	RQ	RQ CV	Expression	Expression SD
23℃	13.74	0.2	27.74	0.28	1	0.138629	1	0.194081	1	0.238507
4℃	12.17	0.17	28.44	0.22	2.96905	0.117835	0.615572	0.152492	0.20733	0.0399556
-20℃	19.1	0.14	27.12	0.03	0.0243489	0.0970406	1.53688	0.0207944	63.1189	6.26414

## Sheet: LRR_RLK
Temperature	Cq value	Cq SD	Cq value	Cq SD	RQ	RQ CV	RQ	RQ CV	Expression	Expression SD
23℃	13.74	0.2	24.34	0.06	1	0.138629	1	0.0415888	1	0.144733
4℃	12.17	0.17	24.7	0.26	2.96905	0.117835	0.779165	0.180218	0.262429	0.0565069
-20℃	19.1	0.14	26.04	0.22	0.0243489	0.0970406	0.307786	0.152492	12.6407	2.28481

## Sheet: CIPK12
Temperature	Cq value	Cq SD	Cq value	Cq SD	RQ	RQ CV	RQ	RQ CV	Expression	Expression SD
23℃	13.74	0.2	21.02	0.46	1	0.138629	1	0.318848	1	0.347681
4℃	12.17	0.17	22.48	0.41	2.96905	0.117835	0.363493	0.28419	0.122428	0.037665
-20℃	19.1	0.14	20.4	0.33	0.0243489	0.0970406	1.53688	0.228739	63.1189	15.6833

## Sheet: bzip
Temperature	Cq value	Cq SD	Cq value	Cq SD	RQ	RQ CV	RQ	RQ CV	Expression	Expression SD
23℃	13.74	0.2	21.93	0.01	1	0.138629	1	0.00693147	1	0.138803
4℃	12.17	0.17	22.39	0.18	2.96905	0.117835	0.726986	0.124766	0.244855	0.0420208
-20℃	19.1	0.14	30.01	0.38	0.0243489	0.0970406	0.00369554	0.263396	0.151774	0.0426036
